# Supplementary material for: Identification and expression analysis of the GDSL esterase/lipase family genes, and the characterization of SaGLIP8 in Sedum alfredii Hance under cadmium stress
Source: PeerJ. 2019 Apr 16;7:e6741. doi: 10.7717/peerj.6741 (PMC6474334; doi:10.7717/peerj.6741)
Supplement: Supplemental Information 4 — The direction of genomic sequences is from 5′to 3′. Sa, Sedum alfredii. [file peerj-07-6741-s004.xlsx]

## Sheet: Sheet1
Table S4 Genomic sequences of SaGELPs
No.	Name	sequence
1	Sa0F.11	ATGTCTCCCATTACATTATTGATGATTGTCTTCATTTCCATTTCCATGCTCATTTCACTGACTAAAGTCGAAGCTTTAACAAAGAGGAATCCATCAGTGCCAGCAGTTTTCGTGTTTGGTGACTCCACTGTCGATCCAGGTAATAATAACTTCATTGGTACAACTTTCAGGAGTGACTTCCCACCTTACGGTCAGGACTTGCCTGACCATATGCCCACTGGCCGATTCTCCGACGGCCGCCTCGTCACCGATTTCGTAGGTAAATGTAAATAACATTACACAATAATTTTTTAAAAAAAACTAAGTGATCGCTTTTGGTTCATAATGTTTTATTTTGGTTTTTTTGTTTTGTTTTGAAAGCTTCTTACGCTGGTGTCAAAGATTTCATACCACCTTATT…
2	Sa0F.223	ATGAGAAGCTTTTGTGCATATCTATGTGTGTTGGTGCTCGCATTGTTGTTCCTAGGAGGACGACTAACCGAATCCAAATGCCAATTCAAAGCCATTTTCAACTTCGGAGATTCGAATTCCGACACGGGCGGATTTTGGGCTGCGTTCCCCGCTCAGTCCGGCCCTTTTGGTATGACTTACTTTAAGCGACCCGTCGGACGCGCTACCGATGGACGCCTTATGGTCGATTTCTTAGGTAACATGAGTTTAACATTGTCTCAAAATTGATCATATATGACGTCATAAAAGTTAGTATTATTTGTTAACGTGCATGTTGAATAAAATTGAAAAATAATGTGTACAGCTCAAGCGTTTGGGATACCATACCTGAGCCCGTATTTGCAATCAATCGGGTCGGAT…
3	Sa0F.262	ATGAGAATTTTATTTTGCTTATGGATGTTCTCTACGAACCTCTTACTGATGCGGAATGTTCAAGCAAGTGGTAAAGTTCCAGCGGTGATTGTTTTTGGAGACTCTTCGGTAGATTCAGGCAACAACAATCATATCTCCACTATGCTGAGGAGTAATTTTGAACCATATGGACGTGACTTTAAGGGTGGTAAGCCTACAGGTAGATTTTCCAATGGGAAAATTCCGACAGACTTCATTTCTCAGGCGTTTGGTATTAAGCCTACTGTGCCTGCTTACTTGGATCCTGCGTATAACATATCACATTTTGCTGATGGAGTTAGCTTTGCTTCGGCTGGAACTGGTTATGATAACGCCACATCCAACGTTCTCGTAAGTTCATCAAATTACACTGTTTATCAC…
4	Sa0F.41	ATGAGCCTCGATGCTTCAAATTCACTCATTATTGTGATCCTAACAACGTTGTTCCTCTCTTCATTCTCCGTCGTCGCTGTTCTTAAGCCAAGTGCACCAGCATTGTATGTCTTCGGGGATTCGTTGTTCGACAGTGGAAACAACAATTTACTTCCAACTCTAGCTAGGGCAAACTTCCCTCCTTACGGTGTTGATTTTGTGAACGGTGCTACCGGAAGATTCTCTGATGGAAAAACCGTAGCTGATTTCATCGGTAAGCTAACCATTACAGCTCCATTCTTGCATTTCATTTTCACTACACATATTGTATAAGCTTCATCCAAGTTATGTGACATGTACTACGTAAAATATGACCAAAATACCCTCGTATTTCACCAATTGACGAGGGTAAAACAGTAA…
5	Sa0F.898	ATGTTCACACAGCATATATTTATCAAACATTCAACCATTTGTAGGCAGTCAAGGGATTCATCTAGTGCAACAATGTCATTACTACTGTACCTGTCATACATGTTTCTGACACTTGTGTCAGAAACTCAAGCCAGAGTGCCTGCCGTGATAGTGTTCGGAGATTCGTCGGTGGATTCGGGCAATAATAATTGGTACCCAACTCCTTTAAAGAGCAACTTTGAGCCTTATGGCAGAGATTTCAGTGGTGGAAAAGCTACTGGCAGGTTTTGTAATGGTAGACTTGGACCTGATTTTATATCTGAAGGTTTTGGACTTAAGCCAGTTGTGCCTGCTTATTTAGATCCCAGCTATACCATTGCGGATTTCGCTACAGGTGTAAATTTTGCCTCTGCTGGCACT…
6	Sa105F.31	ATGAAACTCTCTTCCTACCTCATTACCATTTTCTTGATTCTTGTACCATTCTTGTTGTCGCATGAAGCTGGTCTGGTTCTGGCAACAGAAAAACACGGTCGGTACAAGAAGGCATTGTTTGTGTTTGGTGACTCATTGTTTGATCCTGGTAATAATCAGTATTTAAATAGCAGCAGCAGCTCTCAACTTGGAACTGCTACTACTTGGCCTTATGGTGTTAATTACTTTCGCCGCCCCACCGGTCGCCTTTCCGATGGCCGCATTGTCCCTGACTTCCTCGGTATATATTTACCCTACTTCAATTTTGTTAATAATTAACTAGTTAATTACTCGTGAGATTGATCATACTTACCGTTCTACAACTAGTATTTTTTTTTAACTTGATATTTAATAAATATA…
7	Sa10F.217	ATGACATCAACAAAAACAACACCATTTCAAACACATGCAGCTCAAGCTCAGCTGTTACTCATCTCCATATCTCTGATGATATTCCATTTAGCTGATGTTAGTAGTAGTAGTAGTAGTAGTAATAAGGTTCCGGCGATTGTTGTATTCGGAGACTCATCAGTTGACGCTGGTAACAACAATCAAATCTCAACTGTTCTCAAAAGTAACTTTGAGCCTTATGGAAGGGATTTTATAGGAAGCAAACCAACTGGAAGATTCTCTAATGGAAGAATTCCTCCTGACTTCATATCCGAAGCTTTCGGTCTTAAACCCATTGTCCCTGCTTACTTGGATCCAAGCTATAACATTGCTGATTTCGCTACTGGTGTTTGTTTTGCATCAGCTGGCACTGGCTTCGAC…
8	Sa10F.441	ATGAAGATTTTATTTATCTCATGCATGTTTTTATTGAACCTGTTACTGATGCAGAGTGTGGAAGCTAGTGGAAAAGTTCCGGCAGTGATTGTTTTTGGAGATTCTTCGGTTGATTCAGGGAATAACAACCATATCTCCACGATGCTGAGAAGTAATTTCGAGCCGTATGGGCGTGATTTTCAAGGTGGTAAAGCTACAGGAAGATTTTCCAATGGAAAAATTCCAACAGATTTCATTTCTCAAGCTTTTGGAATTAAGCCTACTGTGCCTGCTTACTTGGATCCTGCATATAACATCTCACATTTCGCTGATGGAGTTTGCTTTGCTTCCGCCGGAACTGGTTATGATAACGCAACTTCCAACGTCCTCGTAAGTTCCCCAAATTCCACTGTCTGTCAG…
9	Sa110F.22	ATGGGGAACTTGAGTGCATTTGTGTGCAGAGTTGTGATATTTAACTTTCTGGTTTCTTTAACTCTGAAAAGTACTGATGCTGAAGATTTGCTTCCAGTTTTCGTATTTGGCGATTCGACTGCAGATGTTGGGACTAATGATTTTCTACCAGAATGTCAAGTTAGGGCTGATGTTCTTTACAATGGGATAGATTACCCTTTGCAAGTCCCAACTGGAAGATATAGTAATGGCTATAATACACTAGATTTTATTGGTGAGTGACAACGAATTTATTCGTATAATTGATTGTAATAAATTAATAATTACAAATGAGAACAACGAAACGTAAATTGTTTTAGTAGTTCAGGAAATGTAAACTCACAGTGTTTTTTTCTTGTTTGGTGTTTCAGCAATGCTTTT…
10	Sa116F.110	ATGGCCGCCCCAAGCTCCCCCACTCACATCCTCTTCCTCCTATTTGCATTTGTTTCAGTATGCATTCACAATGTCATATGTTACGACTTTAGCCATCCAGCCATTTTCAACTTTGGTGACTCTAATTCTGATACAGGTAACCTTGTTGCTGGAATTGGTGCTCATCTTTATCCACCCAATGGTCAATCTTACTTCAAGATTCCTTCCGGGCGCTTCTCCGATGGCCGTTTAATCATTGATTTTTTGGGTAAGTAAGTTACTAACTTTTTTATAATTTTATATACCCTTTTTCAATGGTATATGACATTTTGAGTTCTTGACAATGTTTTGTTTAATTATGTTTTTGACAGCTGATGCTATGGACCTGCCATTTTTAAATGCTTATTTGGAAGCAGTTGG…
11	Sa116F.65	ATGCTCATCGTCACGGGACAGTTTGATTGGTATTGGATTTATCTGGCAGATTTCAAATACCCAGAAAAATCCTCAAAGAGAGAGTTTTTGCAGGTATCTCTTTTTTCTCTACTTTGTTGCTTGCTACTTTTCAGTACTAGTGACAAGTGAGTAGTAACATCTCTATCTTTATCTACATCAAAGTACTAAATAAATGCATACATGCACACTCCCCTTCCTTTTTCACTCATCATTTTTTTCTCTTCTTTTCAGATTTTCATCACTCCATTTCAGCACCATCTTGCTACCTTCCCCATTCTCCTCAAGCTAGTAAGTCCTTTGTTTTCTTGCCTCCTTCAGTCTCTGAATCTGATAATGCATGATGCTTATGTTATACATGAAGAAACTGTAACTGCATAT…
12	Sa121F.27	ATGGTGTCTGATCCTGTGTTTGTGCTGTGTTTGGTGCTCACTTTAGGTTTTGGTGTAGTGTTTGCTGACCCACAAGTCCCTGGCTACTTCATTTTTGGTGACTCTTTAGTAGACAATGGAAACAACAATAACATTGCATCTTTAGCTATGGCCAATTACTTACCTTATGGTATTGATTTCCCTCGTGGACCGACCGGCAGATTCTGCAATGGAAAAACCACCGTTGATGTCATCGGTAAATCACTAATTAAAATATCACACATGATTACATGACCTCTCTCTAGCTTGACCTATATGTACATTTTTGATTATTTACTAATAACTTTTCTTTCAGCTGAGCTTCTTGGCTTCTCCGATTACACACCGCCTTTCGCTAGCGCTAGGGGCAGAGCTGTGCTC…
13	Sa129F.2	ATGGCGACACAATCCATCCTCACTACATTTCTGATCATTTTATCAATCTCAACTTGCAGCATCAGAAGTGTTCTTAGCCAAGAAGCTTTGCCCGGAACCAATAAAGCCTTGTTCATCTTCGGAGATTCTTTATACGACGCCGGAAACAATGTCTACGAGCCTAACAACAGTCATATTAATTACCACCCTTATGGCAGAACATACTTCAATAACACTCCCACCGGACGTGTTTGCGACGGACGCATCATACCTGATTTCATAGGTACGTTAAACAAGTCCCGTTACGGAAAATCAATCTTATGTTTCGACTTTTTGTGAAAGTACCTATATATTTCTTTTTTTTCTTTTTTTGGGAGTATGACTCTATATATTTTTTCCATTCATACAGGATCACCTTTT…
14	Sa12F.49	ATGGCCATGAATGCTCTTGCAATTGCATCCATTGTCGTCTGCTCGTTCTTCATTGCTTTCTTCACCAATGCTGCACTTGCCGATCCTCAAGTCCCATGCTATTTCGTGTTTGGTGACTCCCTAGCTGATCCTGGCAACAACAACAACCTTAAAACCATCGCTAAAGCTAACTACGCACCTTATGGAGTCGACTTTCCTGGTGGTGCGAATCCTACCGGAAGGTTTACAAATGGCCGAACTTACGCTGACTTCATCGGTGATCATCTTGAAGCATTGTTGCATGTTTTAATGCATGAATGTTGATGTTCTGAGTTTCTGACTCTTTTTTTGTGTGTGTATAACATTGCAGCTCAGTCGCTTGGTTTCACTTCCTTTGTACCGTCGATTGCCAATGCTGCT…
15	Sa136F.34	ATGGATGGCAGTGTCAGCCACCTCCTCCTCATGTTCAATCTCTCTGCTATCTTGCTACTGTTATCGTCGACGTTTTACAGACCGTGTAATGGCCGAGAACATCAGAAGCCTAAAGCAACTGCTTTCTTCATTTTTGGAGACTCTACAGTTGATCCAGGCAACAACAATTACATAACCTCAAACCCAGAGAACAGAGCTAATTACAAGCCTTATGGTCGAAATGGTTTCTTTGCTTACCCAACCGGCCGCTTCTCCGACGGCCGCATTTCTGTCGATTTCATCGGTATGTCTGCAAATGTTTTCTACGAAATTGCAAGTTCTAATAATATCATCATTTTTGGTAAACACATTATATTTAAACTGCACAAAGATACTATTTGTATTACACAAATAAATGTT…
16	Sa13F.102	ATGGTGTGGTCTAACCTTGTGTTTGTGCTAGGGTTGGTACTCACTTTGAGTTTTGAGCTAGTGTTTGCTGACCCACAAGTCCCTGGCTTCTTCATTTTCGGCGACTCATTAGTAGACAATGGGAACAACAATAACCAACCATCTTTAGCTATGGCCAATTACTTACCCTATGGGATTGATTTCCGGCCTCCCGGACCAACAGGGAGGTTCTCCAATGGAAAGACCACCATTGATGTCACATGTAAGTACACTACTACACTACAATCTCATTATTTACTAACTAGGTCATTCTCTTTCTTAAACTGTACTATACCTTGCAGCTGAGCTTCTAGGGTTCTCTGATTACATTCCTCCTTTCGTTACGGCCAGGGGCAGAGCTGTGCTCAAAGGAGTCAACTA…
17	Sa13F.118	ATGAGAGCTATGGTTATTTATCTATTAGGAATTGTCAGTGCTGTATGTTGTTCCTTGATTGCAGATCATGGGTCTGCAACTTCTCCATGGCTCACTTATCAAGCTATTTTTAACTTCGGTGATTCATTATCCGACACTGGAAATCTCATTCTATCCGGCACTGGTACATTTCCAGCTGCGGCTGCTAAGCTTCCCTATGGTGAAACTTTCTTCAAACAACCAACTGGACGTTTCTCAGATGGTCGTCTAATGGTAGATTTCTTTGGTAAATTGCTTCTCTCTCCTTATACAAATATTTTATTACACCATCATTTAACTCAGAAACTTGTTGCGATTATATAATCAGAATATACTGAATATTCTTTTTTAAGTGAACATACTACACTTGCGAAACTCACT…
18	Sa14F.252.1	ATGTGCAAGCTTTTATACTCATGTTGGTTAGCTCTGACAGTTTACTGTGTTTCAGATATTTGCTTGGCCAGTGAAGTTCTTCCTGCTATGTTTATATTCGGAGATTCGATTCTTGAAGTTGGGAATAACAATTATATTCCTTCGTTATCTAAAGCTAATTTTGTACCCAATGGTATTGATTTTGGCGGACCAACTGGAAGATTCACAAATGGTAGAACAATCATCGACATCTTAGGTAATTTTTTTTTCGCTGTTTTGTTGTGGTTTCATGTTTAAACTTTCACGCTTGTCTCCATTTTTCTTGGATTGAGTTTAGTCGAAATATTTCCAGGCCAGCAGATCGGCGTTGATGGGTTCATTCCACCTTACCTTGCTCCAACTACAACAGGACCTGTGATT…
19	Sa184F.22	ATGAGATTGTATATTAGTTATTGTGCTGTGCTGTTGGTTCTGGCTTTGAGCTTCTTTACGCTTTTGGCTGAACCTCAAGTCCCGTGCTACTTTATCTTTGGTGACTCATTGGTTGATAATGGGAACAACAATGCTATTGCATCTTTAGCTAGAGCAAATTATTTTCCGTATGGGATTGATTTCCAATATGGGCCAACGGGAAGATTCAGCAATGGCTTGACTACTGTTGATGTAATCTGTGAGTCTATCTATGTTCAACTTTGTTTACCATTTAGAACTGTTTATGATGATGGTGTTCTACTAACAGGTTTTTTATTGACTCTGTGCAGCGAGGCTGTTGGGTTTTGAAAATTACATCCCGCCGTTTGCAAGTGCTGGTGGCGAAGAAATCTTGAGAGG…
20	Sa18F.151	ATGGCGGCTCTACGGACATTTCTCGTCCCACTTTTGCTACTCTTCTACTGCTGCATTTCAGCCAGCCTGAATGCGCAGTACCAGAGAAGCAGACAAACTAAAACATGCAAATTTCCAGCCATTTTTAACTTTGGTGATTCTAATTCAGACACTGGAGGGATCTCTGCTGTGTTTTATCCGATTGTCGCGCCTTACGGACAGACATTCTTTAAGAAAGCTGTGGGTCGAGCTTCCGATGGTCGACTCATGGTCGACTTCTTTGGTACGCTCACATAGTGATGAATTCCACAAGGACTCCCGGTTACTTTTTTTATGTCTTTTCTTTTTTTTAAAAAAAAAAATTTATACCTACATCGTCTGAGGACAAGACATCCACCGACTCAAAGCGAAAATGTGTCC…
21	Sa1F.117	ATGGCAGGTACGTGGAAGTTGATGGAAGAAGCTGATCATTTCTTGAGCTCCATCGATGTTTGTTTAGCTGTTTAATGTTTTATACATTATTATCTTCTATTTTCAGCGTGGAACGTGGTCAAAGGAGCAACTGTAAAATCCGGTCGGAAACAACATAGTTCCTTGAAGCTTTTTGTTTTCGGGGATTCTTATGCGGATACTGGTAATTGGGGTGAAAATGATGCACCGTCTTGGAAGCAGCCTTATGGCATAAGTTTCCCTGGCAAACCATCCGGCAGGTTTTCTGATGGTCGCGTCTTAACTGATTACATTGGTATGAATGGCAATGTACTAATTGTTGAATTTGGAGCACATCAGATCTTGAGCTTTTTGAGTCATGGTTTTTTTCATTCATGTGTC…
22	Sa207F.22	ATGGTGAAAATGAAGTTTGAGGTCACTCTGGTGGTGATGTTACTTGGTTTATTTACAGAGGCGGACGAATGTGAAGGTAAAGTTGTGCAGTTCATCTTCGGAGATTCGTTATCTGAAGTTGGTAACAACTTGAGACTACCCAAGAGCTTAGCTAAAGCCAGCTTACCTTGGTATGGCATTGATTTTGGAAATGGAGTTCCTACCGGAAGGTTTTGTAACGGCCGCACCGTTGCGGACATTTTAGGTACCATGCAAATTCCTATGGTTTATTTTCAGTTGTTCCAGTCACTAACTTCAGTGTCTATGAATTGTGATTTTAGGCGATGAAATGGGATTCCCTAGACCACCGCCGCTTCTAGACCCAGACATTACTGAGGATGCTATAATCAAAAACGGATT…
23	Sa20F.120	ATGGGATCTGTATCCTTTCGTAAGGGTTCAAATTCTAAAACATGCGCAAAATCATGTTTGTGTGACACTCGGTCGTGTTGCGTATTTTGTGTGACACTCATTTGGCATGATACCTCTTTAGTCAAGTATGTGCTACTTAGAAAGACAATAACACAGCATAGAAAAACCATGTTCAGATTTCCAAAAATCTTGTTTCAAGTTGCAGCATTTAATCTTCTTATCAGCTATGTCCATCCACTTTTGAAGCTACCAGAAAATGTAACCATTCCTGCTGTTTTCATCTTCGGTGACTCCATCGTCGATACCGGTAACAATAACCGCCTCAACACCATCGTGAAAGCCAACTTCAAACCATATGGAAGAGATTTCAAAGATGGAAAATCTACTGGCAGATTTAGC…
24	Sa217F.43	ATGAGGTTGTATTTGAGTTTTTATGCTGTGGTGTTGGTTCTGCCTTTTAGCTTTTTCAAGCTTCTGGCCAAACCTCAAGTCCCGTGCTACTTTATCTTTGGTGACTCGTTGGTTGATAATGGGAATAACAACGCTATTGCATCTTTAGCTAGAGCAAATTATTTTCCCTATGGAATTGATTTTCAAGATGGGCCAACAGGAAGATTCAGCAATGGCTTGACCACTGTTGATGTTATCTGTGAGTCTATGTTCAACTTTGTTTAGCTTTTATAACTGTTTACCTTAATGTTGTGCTAACGTTTTGATTGACTCTATGCAGCGAGGCTATTGGGTTTTGAAGATTACATACCACCATTTGCGAGTGCTGGTGGCGAAGAGATCTTGAGAGGTGTCAATTTT…
25	Sa248F.34	ATGGCTTCAGTTCATTATCATTTTGCTATTTTTGTGATTTTGATCTTGGCATGCAGTTTTGCTAATGCACAAGACTCGACCACATTGGTATCAGCTATCATCACTTTTGGCGATTCAGCTGCTGATGTTGGTAACAATGACTACCTTTACACTATCTTTAAAGCTAACTATCCTCCTTATGGCCGTGACTTCGCTGGCCATAAGGCTACCGGTCGCTTTTGCAACGGCAAGTTGGCCACCGACATCACCGGTAAGTTTCACTTTCCATCATTTCACTCGACTCGTCGAAGAAAACATGCAACTAGTAACTTGGGTGTGTTTTTTTTCAACTCAAAAAGACTTCAATCGAACTGGACTTAAAAACTCGAAAATCGTGCAGCTGAGACTTTGGGGTTCACG…
26	Sa24F.223	ATGGACGCATTGTCCATCGCACTATTTCTCATACTCATACATTCCCCGTTGACCATCAAAGTCAACGCCAATCACCACCTCCAACTGATCTCACCACCCTTCCCTACCATTCTAGTCTTCGGCGACTCCACCGTCGACACCGGCACCAACAACCACATTCCCACCGTCTTCCGCAGCAATCACTTACCCTACGGCCGAGACTTCCCTAACTCAATCCCAACCGGTCGTTTCTCCAATGGCAGACTCTCTGTCGACATGATCGCAACTTCACTAAAAATCAAAACTTTTGTCCCTCCTTTCCTTGACCCGCATTTATCCACTTTAGATCTGATCACCGGCGTCAGCTTCGCATCCGGCGGATGCGGATTTGATAACACTACTGGCCTTCTTGTTTCAGTC…
27	Sa24F.262	ATGGCGGAGAAGTTTGGAGTTGTGATTGTTACAATGTTGGTGATTTTAGCAGCAATGGAGACCGGAACAATGGCGGTCGGGTCGTCCAAAACTGTAACCTTTGTGTTCGGTGACTCGCTTACTGAAGTTGGGAACAACAATTATTTGCAGTACTCATTGGCGAAATCAAACTTTCCATGGTATGGGATTGATTATCCCGGCGGAAAGGCCACTGGAAGATTTACTAACGGAAGAACCATCGGAGACATCATATGTATGTAAATACCTTAATCAATAATTATATACTTGGATGTTATAAATGTTGAACTTAACTGAATTTGTGTGCAGCTGAGAAGCTTGGGATTGTCTCTCCGCCGCCGTATCTTTCCCTGTCCGCTACCGACGATAAAATGCTTGGAG…
28	Sa258F.41	ATGGCATCTGACATTCTTTATCGTCTTCATACTCCGGTTGCTATTTTTATGTTACTCATATTTACAAACGCAGCCATTCGTAACACACACAATAATCGCTCGAAACTACGAGCAGCTTTCGTGTTCGGAGACTCGACGGTGGACTCAGGGAACAACAATTTCCTACTGACGGATTTTAGAAGTAATTTTCCACCTTATGGACATGATTTTGCTGGAAGTGAACCTACTGGAAGGTTTACAGATGGCCGACTTGTCACTGATTTTATAGGTTGTGATCTGTTCCTCCTCTCCTCGTACTTTTGTTCTTAGTATTGTTCGAATTTCATACTAAAATGTTTTTTAAACAACAATGCAGCATCATACGTCGGCATCAAAGATTACATACCTCCTTATTTAGAT…
29	Sa26F.146	ATGGAGTTTTCTAGTATCATTTTCTTCATCTTCTTCTTCTTTAGTGCCACTGTTACATTTGCTGCACCAGTGTCACAACAGCAGCCGTATGAGTCCATTTTCAACTTTGGTGACTCACTCTCTGATGTTGGAAACTTGATTCTAGCTAACCCTAAGGCCTTTGCTGTTGTGGGCAAGCTTCCTTATGGCCAAACCTTCTTTGGTCGTCCTACTGGCCGCTGCTCCGATGGCCGTCTCATTGTTGATTTTCTTGGTACCACCACTTTCAAGTTTCAACACCTTTTTTGACAAATTAGAGTTTTAATGTAACATCAACTCACTGGCTTCTCATTCTTGTTTGTGACGTGTAGCTGAGGCTTATGGGTTGCCATTCATGCCACCTTATTTGAACATTTCAAA…
30	Sa26F.158	ATGGAGTTGCATGCGAGTTATTACTGTGCTGTGATGCTTGGTTTGTGTTTGAGTTTTTGCAATGTTTTGGCTGAGCCTCAGGTTCCTTGTTACTTTATTTTTGGTGATTCGCTGGTTGACAATGGGAACAACAACGGCATTGCGTCTCTTGCTAGAGCTAATTATTTCCCATATGGGATTGATTTTCAAAATGGACCGACTGGAAGGTTCAGTAATGGCTTGACTACTGTTGATGTCATCTGTAAGTTTCCTTTCAGTTTCTGTCAGTGTCTACTTATAATGTTTATACCTTGTACGTACTGATGGGATTTGGATTCTCTGATTGCAGCTAAGTTGTTGGGTTTTGAAGATTACATTCCATCGTACGCCAGTGCGAGTGGCCAACAGATTCTGAGAGGT…
31	Sa27F.42	ATGGGTGCTTTCAGGATTACCTTCTCTGGGTTTGTCATTTTCATTTTCTACGTTGCAATTTCTGTAGCTGATGCGGTGGATTCCGTATGTAACTTTCCAGCCATTTATAACTTCGGCGACTCCAATTCCGACACCGGAGCAATATCTGCCGCTTTTCTTCCCATCCCGGCTCCTTATGGTGAGTTGTTTTTCAAGAAACCAGCTGGGAGGGACTGTGATGGCCGCCTTGTAATTGATTTCATAGGTAATCCATCTTTCATTAAAATTGTGCTTACCAACTGTTTGACGAAATGCTTCAAAGAAAATTTTAATTAGTTTTCGCATTCTTTTGATGCAGCTGAGCGGTTGAAGCTGCCTTATTTGAGTGCTTACTTAGACTCAATCGGAACAAATTATAGA…
32	Sa28F.36	ATGGAGTTGCACCACCACTTTTCTCTCTCTAATAATTCTTCATGTATTGGAACCCTACTAGTTTGTTTTAGTGTTCTCTTATGTTGTGTTGGAGTGCAATCAGTACTAGTACTTGATATCCCTGAAAGTCAGAGGTTTCCGGCCTTGTTGGTATTCGGAGACTCGATCGTTGATCCTGGAAACAACAATCATATGGCTACACCATCAAGAGCTGATTACCCTCCTTATGGCCAAGATTTCCTAGGAGGTAAAGTTACTGGAAGATTTTCTAATGGCAAACTCGCAACTGATTTTATCGGTACGTTAATTAAAACCCTACACATTCTCTCTCTCTCTGCTAGTCATATACAAAACATATTAAGGTAACATTATTATTTGTCGCAGCTCAAGAACTCTCCA…
33	Sa28F.37	ATGTATACTCATACAATTCAGTGTGAAGTTCTAAAAAGCATACAATCTAGGGCTTCCTTAATTAGCAAATTGTGGCTTGTATTATTTTGCACTGGATTGCTCTTGAGCTTCTCTCATGTTCAATCCAAACTTCCGTTACCTAAAGATATTAAGTTTTCAGCATTGTTAGTATTTGGAGATTCGATTGTCGATCCAGGCAATAACAATAATGTCCATACACCATCTAAGGCAAACCATCGTCCTTATGGAAAGGATTTCATCGGAGGAGTACCCACCGGCAGGTTTTGCGATGGAATGGTTCCTTCCGATTTCATAGGTGATCAGAATTTCATACCTACACATGCATGCATTGCTAGGCTATGCAGCTTTTATTTGGATTCAAATCTGGTGCAGCCGGTC…
34	Sa28F.38	ATGGATCCGATGTTTTTCAAAAACTCCGGAATCCGGTCACTTAATCGTTACACAAATGCACCATTGCTAGCTTTTTACTGTGTTTTTTTCTTGTGTAACGATTGCATAGAGTCACGTTTAGATAAACAATTTCCAGCATTGCTAATGTTTGGTGACTCAATCGCTGATCCCGGCAACAACAACAATTTGTTGACGGTGTCTAAGGCTGACTATCCGCCGTACGGTAGAGATCTTAAAGCCGGAGTCCCGCTTGGGAGGTTCTCTAATGGAAAATGCTCCGGTGACTTTATAGGTTTGTTCTCTCAAATGTCAAAACCTTGTTAAAAAATGCCTAAATTTTTTGCGGACAAATTTTTAGTCTAACAGTTACACTCTTGATAACGTTCAAATGACCTGATT…
35	Sa28F.39	ATGGAATTCGGTTCTACCAAAAACTCCGGATTTGCAGCAGTGCTTGTGATGGTCATGGTTTTCTCAAAGTGGACTTGTGTGGAATCGGTTATTAGCATACCTGAGGATAAAAGGTTCCCTGCTTTGGTACTATTTGGTGACTCTATCGCCGATCCCGGAAATAATAACAATATGTTAACCACCGCAAAGGCGGATTTTCCACCGTATGGTAAGGATTTCAAGGGTGGTGTTTCATCTGGGAGATTCTCTAACGGAAAGATTCCGGGGGACTTCATAGGTGAGTATTTAGTATTCTCCTTATTAACTAACGACGTCGTTTTGGTACTTTCCGCATTTTGGTATTTATGCTTGAAAAGTTCTGGTTTGAGTAACAGCTAGTGAACTATCGATCAAGGAGTA…
36	Sa29F.188.1	ATGGGCTCAGTTCATCATTTTGTCATTGCTGTGACATTAGTATTAGCATGTACATCTGCTTATGCACAAGACTCGACCACATTGGTATCTGCTATCATCACTTTCGGTGATTCAGCAGCTGATGTTGGTAACAATGACTACCTTTACACTATCTTCAAAGCTAACTATCCACCTTACGGCCGTGACTTCGCCGGACATAAGGCTACTGGTCGCTTTTGTAACGGCAAGTTGGCCACTGATATCACTGGTACGTAACTTCCATATACACGTTGCGTGAATGAGGCGAATATGAATATGACTTACTTATGGACGACTGTATTTTACGTGTAGCTGAGACATTGGGGTTCACAAGCTACGCGCCGCCGTACCTGAGCGGACCGTCCGGGAAGTCACTTCTCT…
37	Sa29F.343	ATGGGATTAAGCGTCAGGTCATATTTGCTCTTCTTCTTGCCATGTATCTTACTGTTACTGATACAAAGCGTGGAAAGTGAAGTCAAAAAAATCCCAGCATTGATAGTTTTTGGAGACTCTTCCGTGGATTCTGGCAATAATAACTGGTACCCAACTCCACTCAAGAGTAACTTTGAGCCTTATGGCCGAGACTTCATCGGTGGAAAGCCTACTGGAAGGTTTAGCAATGGCCGTGTAGCTCCTGATTTAATGTCTGAGGCATTTGGTCTTAAGCCCCTTGTTCCTGCTTATTTGGATCCTAGTTGTACCATTGCGGATTTCGCTACTGGCGTCAACTTTGCCTCTGCAGGCACTGGTTTCGACGAAGCCACCTCTCAAGTACTCGTAAGCCTGAGATTT…
38	Sa2F.358	ATGTCGACACCAGTCCTCTGCCGCACCGTCTTCCTCCTTTTCCTGTCCTTTGCAGGTCATCATCAATCCTCATCATAATCATCAACACTAACTCTCTAACCGTCTCTTCAGTTGTCCTCATTTTTTCCTGGTGCTCTGTAGGAAATGGTGCAAGTGTAGTAGAAGCTCGTCAACACAGATTTCAAACCCCGAGTAAGCTATTCGTGTTCGGAGACTCTTATGCCGACACTGGAAACACCAACAAATCCCTAACCAGTGCCTGGAAAGTCCCTTATGGAATCACATTTCCTGGTGTACCTTCCGGACGTTACTCCGACGGCCGTGTTCTCACTGACTACATCGGTACCTTTTTCTCTAATGGATATTTAAGCGTTCACTTTAGACTTTACCGCTCTCTCG…
39	Sa314F.6	ATGGCTTGTTGTGATCTTATGAAAATAATGTTGGTTTGTGTGTTGGGAGTGATTTTTGCCTTAAGTTTTGAGGTATTGGCTCAAGCTCAACCAGCTCAAGTGCCAGGCTACTTCGTCTTTGGTGACTCTTTGGTTGACAATGGGAACAACAATAACATTGCATCCTTGGCTATGGCCAATTACTTTCCTTATGGAATTGATTTCGTACCTCGGGGACCGACCGGAAGGTTCTCTAATGGCAAGACCACTGTCGATGTCATCTGTAAGCAATCATGCATCTTCTCTACATATATATAGTCACGTCGACATGTTTCTCATGTCCTTAATTAAGCGATTAGACTTGATATATATATATATACGTACATCTCTGATGTATAATGCATTTTTCTATTAGCTTGA…
40	Sa32F.165	ATGTATTCTAGAATGCTTAGTGTTTTTGTAATGTTGTGTTTACTTATGCACATTGTGCCAAGGTCGGCGGACTGTGCGCCTGAAGTACCTTGTTACTTTATTTTCGGTGACTCGATGTTCGACGTTGGGAATAACAATTACCTTCTGTCACAAGCTAAAGCAAACTACCTACCTTACGGCATTGATTTTCCTAAAGGACCTACTGGACGCTTCACTAATGGCAAAACAATTGGCGACTTCATTTGTAAAAATTCCTTAAAAATATCACACCATGTTTTTTTGACATTGTACTGAGAGCTTATTTGTCTTCAATGTTTCTCTAACTGCAGCTTCTTATCTTGGTTTCACTGATTTCATCCCACCTTACATGGCGGCGACCGGTCGTAGAATCCTCAAAGG…
41	Sa33F.119	ATGCTATTAGAGAGCACCTTATCATATCTCCAAAAGGCTTCAAAAATGGTGCTAGGGTTTTCAAAATCCTCATCTCACTTCACATTGAAACCTTTCCATAACACATTAGTACTTTCCTTGCCAACTCTAGTTTTCACTCTTCTTATTTGGAGAGACACGTTCCTCGCATCAGCAGTAGATATACCTGAAGATCAAAGGTTTCCGGCGTTACTTGCGTTTGGTGATTCGATCGTTGATCCTGGAAATAATAACGGGTTAAAAACCCTAATCAAGGCGAACTTTCCTCCCTATGGACAGAATTTTAAAGATGGACCAACTGGAAGGTTTTGTAATGGGAAGGTTCCTACTGACTTAATAGGTGACAATTCTAATAAACTCATATGGAGTACATTTTATACT…
42	Sa36F.86	ATGAAATCAACGAATAAGTCTCTGGTGATGGTATTAATGATAGCGGCGCTGACCATAGGTTGCGAGTGTAAAGTGGTACAGTTTATTTTTGGTGACTCGCTTTCGGATGTTGGGAATAATGATAAGTTGCCTAAGAGTCTAGCTAAGGCTAATGTGCCGTGGTACGGTATCGATTATGGTAATGGTATGCCTAATGGAAGGTTCTGCAATGGCCGAACTGTGGCTGACATTATTGGTAAGACTTAAAAGATTCACGTCAAAGTTTATTGAACTTCGACTAGTTCATAAACGGATTTGGTTCAATCTCGACTCAAAAGCTTAAATTTCTGTATATAAGTTCATCATTTTCTTTTTACATTCTCGATAAGTGACATTTCTTCAATTGTATTTCTCAACAAA…
43	Sa39F.196	ATGCGTTATTTTCAGTGTTATATTTTCATTTCCATGATTACCCTTTTCCTACTCTCACACACACTCTCCTCAGCCGCAGCTCCAAGCCCCAAGCTCCAAACCCAACCCTTCTCGAGGATACTCGCCTTTGGCGATTCCTTTACCGACACCGGCAACACTCGCTCCTCCACGGGTCCAACCGGCTTCCAACATGTCTCCAGCCCGCCATACGGTGTCACATTCTTTCACAAACCCACCAACAGATATTCAGATGGCCGTTTAGTGATTGATTTTGTAGCTGCTTATCTCAACCTCACATTCATCCCACCTTATTTAAACAAGAAAGCCGACAAGTCACACGGTGTAAACTTTGCGGTTGCCGGAGCTACAGCTTCAAGCTTTGAGTTCTTCAAGAGAAAC…
44	Sa39F.291	ATGTCACCGGCGGCAGCCAGTTTCATCGCCGTAATCCTCATCCTCGCCAGCGCAATTCTCCGGCGAACAAATGCCATGCAACCATCCACATTCAGCCAGAACACTACAACCTCCGTCAACTGCACAAACAGTACTGGTAATCCCTACTTAGCGCCTCCCACACAAACCCTAAATCCTCCGCCTCCCCTTGTTCCCGCTTTTTTCGTCATCGGTGACTCATCAGTCGATTGCGGCACCAATAACTTCCTCGGAACTTTCGCTCGCGCCGATCGACCTCCGTATGGTGTCGATTTTGATACTCATCGTCCTACTGGAAGATTCAGTAATGGTAGAATTCCGGTTGATTATCTCGGTATACATCTCTTTCCTCCTTAATCTCTGTTATCTATTATGAAACCG…
45	Sa3F.277	ATGGGAAGTGGAAGTGGTGGATTAGTACTTGTCGTTCTCATACTCATCTGTGCCGGGTTGAGCAATGCTGTGTTTGGGAAATCCTATGAATTTCCAGCAATGTTTGTGATAGGAGATTCATTAGTTGACAATGGAAACAACAATTATCTGAACTCATTTGCGAAATCAAATTATTACCCGTATGGGATCGATTACCCTCAAGGCCCTTCCGGCAGATTCAACAATGGGAAAACCATAGTTGATTTCCTTGGTAAGAAAAGCCATTCACTCAACTCTCTTCATTTTTTTTCTTCGGAAAATAAATGTTTCTAACAAAATCTTCTGACAATTTCCAGGGGAGTTGATAGGGATTTCATCAATTCCAGCTTTTGCAGATCCTCTTATCCGTCAGAAAGGTAT…
46	Sa3F.554	ATGTTGGCAATGAGATTATTGAAGTTTGTCTCCGTGAGCATCTTTCTATCAGTGATAATTTCAACAAGCAATGTTATTGAAGGTGGTGTTGGCCGGAGTAGGCAAAAGCCAGCAGTCACAGCTGTATTCGTGTTCGGAGACTCCACTGTTGATCCCGGAAACAATAACTTCATTGGAACACCTTTTACTAGTAACTTCCCACCTTATGGCCAAGACCTTCCTAATCATCAGCCTACCGGTCGATTCTCTAATGGCCGCCTTGTCTCTGACTTCATGTGTACGTAATGTGACGTCACAACTCCCTCATCTTTTCTAAAACATACACACAATGATTTTAGTCTTTATATAAAACTGTGTCGTTTTGTTCGATATGTTGGCTCAGCTGAGTATGCAGGTCTC…
47	Sa42F.134	ATGGCAATGAGGATGAGAGTTTCAGTTATGGTGATACTAAGAATTTTTGGAGCTTTATTAGTTGAAGTTATGTCAGCAGCCGCGGCCGCAGAGGCTCCAAAACCTGTTACATTCGTGTTTGGTGATTCGCTTACTGAAGTTGGAAACAATAACTTTCTGCAATACTCATTGGCAAAATCCAACTTTCCGTGGTATGGGATTGATTACACCGGCGGAAAGGCCACCGGAAGATTTACTAATGGAAGAACAATTGGAGATATAATTTGTAAAACCAGATTTTATCACACTTTTTCTTCTCCACAAGCGAATGATTTTGTAATATTTACTTTGATAACATAAATCTGTGTTTGTAGCTGAAAAGCTTGGAATAGCTCCGCCGCCGGCGTACCTTTCTTTATC…
48	Sa45F.55	ATGGCTGTTGGAATGTCAAGTGTTCTTCTATTCATGTTTATGTTAATGCCATTGATTTCTACATGCTTGAATGTCACTCAGTTGAGACAAATTGTTGCCAAAAATCGAGTCAAATGTATTCTTGTTTTAGGAGACTCTACCGTTGACCCCGGAAATAATAACTGGCTTGATACAATGACCAAGAGTAATTTCCTTCCTTATGGCAAGAATTTCATGTCCGGTTTCCCTACCGGACGATTCTGCAATGGACGGCTCGCCACGGATTTCATCGGTATCAATCATGACCATCTTTTACACTATGAAGATTCATTTATGAAATTTGTATAATTATTTTTTCTTACATAGCTGAAGCATTTGGATTCAAAAGCTCCATTCCACCATTCCTAGACCCTGCACTAA…
49	Sa46F.118	ATGAATGTCTTCTTGTTCTTCTTATACATTCATGAAACATGTTTATCTTTGTTCCTAACTCTTATACTTGTCCGCAACGTTCGTGCACAAAATGTATCTACTTTAGTACCTGCAATCATAACATTCGGTGATTCGCTCGTTGACATCGGAAATAACAACTACCTTCCAACTTTGTTTAAAGCAAATTATCTACCTTATGGAAGAGATTTCATAAGTCACAGACCTTCTGGAAGGTTCTGTAATGGAAAATTAGCTATTGATTTTGCAGGTCAGAACTCAGAACAGTAGTTACTCACTTTGTTGCAGTAATTGAAAGTTGTTGTTAAAAAATTAATGGTGTATGCAATGCAGCTGACTTTTTGGGGTTCAAGATTTATGCACCGGCGTACAATACTCGAA…
50	Sa46F.20	ATGTCTCCCATTACATTATTGATGATTGTCTTCATTTCCATTTCCATTTCCATGCTCATTTCACTGACTAAAGTCGAAGCTTTAACAAAGAGGAATCCATCAGTGCCAGCAGTTTTCGTGTTTGGTGACTCCACTGTCGATCCAGGTAATAATAACTTCATTGGTACAACTTTCAGGAGTGACTTCCCACCTTACGGTCAGGACTTGCCTGACCATATGCCCACTGGCCGATTCTCCGACGGCCGCCTCGTCACCGATTTCGTAGGTAAATGTAAATAACATTACACAATAATTTTTAAAAAAAAACTAAGTGATCGCTTTTGGTTCATAATGTTTTATTTTGGTTTTTTTGTTTTGTTTTGAAAGCTTCTTACGCTGGTGTCAAAGATTTCATACCAC…
51	Sa46F.270	ATGACGTTGGGTTTGCTTATAGAGGTTATCGGAGCGGCGAGGAGTGGCGACAGGGGGTGTAACATTCCTGCAATTTATAATTTTGGTGACTCAAACTCCGACACTGGTGGCACATCAGCTGCATTTTTTCCAAGAGCATGGCCATCTGGTGAAACATACTTTCAAGAGCCAGCTGGGAGGACTTGCAATGGTCGACTCATCATCGACTTCATCGGTAAGTAAACAAATGTTTCGACTTAAGTCAACCAAAAGCGTTGACCGAACATGTCTTGTTTTTGATCTGTTGGTTGAACAGCTGAGAAGCTTAAAGTTCCATACTTGGACGCGTATTTGGATTCAGTAGCGACAAGTTTCAGAAGAGGTGCGAATTTCGCTACTGGAGGATCAACCATCAGGCAG…
52	Sa46F.31	ATGGTGTCTGGTCTTGTGTTTGTGCTTAGGGTGGTGCTCATCACTCTAGGTTTTGGGGTAGTGTTTGCTGACCCACAAGTCCCTGGCTACTTCATTTTTGGTGACTCTTTAGTAGACAATGGGAACAATAATAACATTGCATCTTTGGCTATGGCCAATTACTTACCCTATGGCATTGATTTTCCTCGTGGACCGACCGGAAGGTTCTGCAATGGAAAGACCACCGTTGACGTCTTAGGTAAAAACCATGCATGATCTCGCCCTAGCTAGACTATATATGTACATTTTCATTATTTACTAACTTGACTGTTTATCTATATATATTTATCTTGCAGCTGAGCTTCTAGGGTTCTCCGATTACATACCGCCTTTCGCTAGGGCTAGAGGCAGAACCGTGCT…
53	Sa47F.286	ATGGGTGCTTTGAGGATGATGATTTATGGGTTTTTTATTTTATGCGTGAATTTTGTTTCGGATTCGGTTGAGTTGGGTTGTGACTTTCCGGCCGTTTACAATTTTGGCGATTCGAATTCTGACACCGGAGCTGTATCAGCTGCCTTTTGGCCGATTCCGGCGCCTAATGGAATGAACTTTTTCAAGAAACCTTCTGGGAGGGACTCGGATGGGCGGCTTGTTATAGATTTCATTGGTGAGTGACTGACTGTCTGATTTTGCTTGTTAAGTGTTTGATGAAATGCCTGACTGAAAATTTTCTGTGACTTTGCAGCTGAGCGGTTGGAGTTGCCATATTTGAGTGCTTATTTGAACTCTATAGGTTCAGATTATAGACACGGGGCGAATTTCGCTACGGGT…
54	Sa55F.146	ATGGCTGCTCATCGGAGCTTCCTTGTTCAACTACTGCTACTCTTCTGCCGCATTTCAGGCAGCCTGAATGCGCAGCAGAAACAGAGCTACTCGAAAACATGCAGATTTCCGGCCATTTTTAACTTTGGTGATTCCAATTCTGACACTGGAGGAATCTCTGCTGTGTTTTATCCGATCGTTATGCCTTATGGACAGACATTCTTTGGGAAAGCTGTTGGTCGAGCTTCCGATGGTCGGCTCATGGTCGACTTCTTTGGTACTCTCACTTCTAGTTAATTAATTTCCTAGTTACCCTATTTTTAGACAACATGCAGTTGCTCCTTTTTTCTCTCTCTCTTCTAAACTCTCATGCACACAGCTGCTAGTTGTTTTTATTTTAATACTATTTTATACTTTTCC…
55	Sa56F.143	ATGGTGATCATCATCAACCAAATGTCTTGCATCAAATTAATGTTCATCTACATGTTCCTACTCATCTCAAGAACCAATGTTGAAGCTATGGACACGAATGGCAAGCCAGCAGTACCAGCCGTATTCGTGTTCGGTGACTCCACAGTCGATCCTGGTAACAATAACTTCATCGGTACCGCCTTTCGAAGCGACTTCCGGCCTTATGGACAGGACTTGCCTACCCACAAACCAACCGGACGATTCTCAAATGCTAGACTTGTCACAGACTTCATAGGTAACAACATTGTCTAATGTATGTAACTCATCATCAATTTTTAACACGTGTGTTTCTGTTTCATGTGTTAGCAGCTGCCTATGCCGGTGTCAAGGACTTCATTCCACCTTATTTGGATCCAAAAC…
56	Sa57F.156	ATGCAGAGTAACCAGCAAACCTTTGTTTTGCAATCAGCCATGTCACCACCAAAAGTGCTGCTCATTCTGCTGGCATTTGTCATTGCAGCATTGCAAGGCTATGTGAGGGTGACAGAGGCTCGTGCTTTCTTTGTGTTTGGAGACTCACTTGTAGACAATGGCAATAATAACTATTTACCCACAAGTGCACGTGCCGATTCTCCACCTTATGGCATTGACTATCCCACACGTAGGGCAACTGGCCGTTTCTCCAATGGCCTCAACATACCTGATCTCATCAGTAAGTCCACAGTTTTATTATACAGTACACCGTATTGTTGTGTTACACCCTGACGTCTTTTTTAAAACAATCAGGTGAGGCACTCGGCTCTGAGACTACATTGCCGATTCTGAGCCCTG…
57	Sa5F.25	ATGGCTAACCAGTACATTCCATGGCTTTTCATCCTCTTTTGGACAATGTTGCTAGTCACTGAGAGTGCAGCAGCTAAAGTGCCTGCTATTATAGTGTTTGGTGATTCAACAATGGATGCTGGTAACAATAACCAGATATCAACCATTGCTAGAAGCGACTTTCAGCCTTACGGACGAGACTATTCCGATGGGAAGCCTACTGGGAGATTTTCAAATGGTAGGATACCAAGTGACTTCATCTCTGAAGCATTTGGACTCAAACCTGCCATACCTGCATACTTGGATCCAGCTTACAAGATATCAGACTTTGCCGTTGGCGTCACCTTTGCATCCGCAGGTTCTGGTTACGATAACGCTACGTCCGATGTTCTGGTAATTAACTCCATGACTTTATTCATC…
58	Sa5F.658	ATGGAAATGTCCCTGGCCTTTTTAGCTCTCTTAATCTCCTTTTCCTTTCAACTCATTATCAATCCTGCTTCTATCGTGGAAGCCAGGGCGTTCTTTGTGTTTGGTGATTCCCTTGTGGACAGTGGTAACAATGACTTCTTGGCCACCACGGCTCGTGCTGATTCCCCGCCATATGGCATAGATTTCCCCTCACATCGTCCCACTGGTCGCTTTTCTAATGGTTACAACATGGCTGATCTCATCAGTTGAGTTTGCCACATTTCACATCCATTTCATATATACATTATTGGGATATATATAATAAACCTTGATCATTATTTATAGATGCTAATTTTCTCAGTTTTCTCTCACTAGGTCTGGCAATTGGCTCAGAGCCAACATCACCATACCTCAGCCCAG…
59	Sa64F.90	ATGGAAGTATCAAACCCCGACGACGATTTTCGCACCTTCGTCGTCGTGCTCGTTCTATGTACTTGTGCTTTAGTGTCAGAAGCCAAGATAGTCCTACCGGGAAATGAAACTATTCCGGCCTTGTTGATCTTTGGTGACTCTATAGTTGACACCGGAAATAACAACGATCTAAAGTCCGTCATCAAGGCTAATTTCCCGCCTTACGGACGAGATTTTAATGGAGGAGTTCCGACCGGTCGGTTTTGCAATGGCAGAGTACCTTCAGACATGATTGGTAACTTAAATTCCTTCTTCACATGTCCTCTGTCATTTTAAAATTTTAATTCTGATTATTATGAATTTATCGCGTTGACTTGGTCAATCAGTATTTAACATGTTCACAAAAGTGACAATATCATG…
60	Sa66F.83	ATGAGTATCAAGCTCTCCTCTTTAACATGCATACTCTACAACATCATCGTCCTTCTCCTGACATCTTCACTGATCAATGTGAGCAAACCATGTAACGGAGAGTCAGTTGCTTTCTTTATCTTCGGAGACTCTACAGTGGATTCCGGCAACAACAATTACATTAATACCACACCTGAGAACAGAGCTGATTACAAGCCTTATGGTCAAAATGGTCTCTCTGATGAACCAACCGGTCGGTTTACCAATGGCCGGATTTTTGTAGACTTCATCGGTAAGCCAATGATAATCTTTTGTCATTAGGTTTTTTCCTTTGCCTGAGTTTCTGTTTTAATGTGTACTAGCTGAGAATGCGAAGCTGCCGCTAATTCCTCCGTTTATGGACCCGTCCGCTGAGTACAC…
61	Sa6F.163.1	ATGGAGTTTCAGTTGAAGTTGTTTGCAGTTATGGTCTTAAGTTCAGTACTTGTGTTGGCATTTTTGCTGACTGAAGCTGAGGGTGGTAGAGCGTTTTTTGTGTTTGGAGACTCGTTGGTAGATAGTGGAAACAATGACTTCTTGGCCACTACTGCTAGAGCTGATGCATACCCTTATGGAATTGATTCCCCGTCTCACACACCCTCCGGCCGCTTCTCCAATGGCTATAACCTCCCTGATCTCATCAGTATGTACATTTACATTCAGCCACCATTTTTTGTTCTTGAATCCTCTTTATTCAGAATATACGTGTAACGTGTGTGTGTAGTTTTAGCAATGTGTGACATTTATATCTGTTTTCAGGCCAGGAAATCGGCGGTGAAGAGTCTCCATTGCCAT…
62	Sa6F.233	ATGCCTTCATCTCGTAATCTCCATCACCACCTCGTACTCACCACCCTCTTCATCTCCATCTCCTCCTCCGCCGCAACCACTCCTTGCACGAAACCCCCAATCATCTTCAACTTCGGCGACTCCAATTCCGACACTGGCGGACTCGTTGCTGGACTCGGCTTCCCTGTTCTTCCTCCTAATGGCCGTACTTACTTTCAAAAATCCACTGGTCGCCTCTCCGACGGTCGCCTCGTCATCGATTTTTTATGTGAGTCCTTTTTTTTATGATCATTTGGACCGTTTCATATTGCGAAATCCATTAGTGCTTAGAATTCAATTGGATCGACTCTTAATGTCATTACTGTTGCTGCTAGTCTGCTACTGCAGTGTAGATTCAAGAGTTGCGAAATGTTTAGGGTT…
63	Sa72F.20	ATGGCTAGCAAATCGGTTTCCCTCGCACTATTTGCATTAGTGCTTCTCCATATTTCTTCCGTCAAAGCTGGCAGCCAGCTTCCTCTCTTTCCAGCCATCCTCATCTTTGGTGACTCCACTGTTGATGCCGGCAACAATAACTACATACCCACATTGTTCAAAGGGAATCACCCTCCATATGGCCGTGACTACCCTGGTGGGATTGCCACAGGCCGTTTCTCCAATGGTAAACTCACCACTGATGTCCTAGCCTCTTTGCTTAATATCAAAAGTGCTGTCCCTCCATTCCTAGACCCGCATTTGTCGGACGCTGATATCAAAACAGGCGTCAGTTTTGCCTCCGGTGGTGCGGGTTATGATGACACTACCAACTTTGCTTCTGCCATCCCTATCACCCAT…
64	Sa79F.141	ATGGAGTACTTTCACATTTCTCTCTCTTCTTCTTCTCCTCCTCCTCCTCCTCCTCCACGTAACACTATTTCTAAGGAAAGAACCTGCTGCCTACTAGTTTGTTTTAGTTTTCTCTTGTGGTGTAATGTTGGGGTGCAATCAGTAGTTGATATCCCGGAAAGTCAGAGATTTCCAGCCTTGTTAGTTTTCGGAGACTCCATCGTTGATCCTGGAAACAACAATAATATGGCTACTCCATCTAGGGCTGATTATCCTCCTTATGGCCAAGATTTCCAAGGTGGTAAAGTCACTGGAAGATTCTCTAATGGCAAACTCGCTACAGATTTTATAGGTAATTAAAAAAACTCACAATACACATTAAACTATGTATGTTTTTGGTACCAAAATGTTTTCCTATCA…
65	Sa79F.142	ATGGAGTCAAGGGCTTCTACTTTTAAACGTACTCTTATAACCTCCATAAGTAGCAAAATATGGCTTGTAATTTTTTGCAGTGGATTGCTCTTGTACTGCTGCCCTCATGTGCAAGCAGAATTTAAGTTACTAAAAGGTATCAAATTTTCTACATTGTTAGTATTTGGAGATTCGATTGTCGATCCAGGCAACAACAATGATGTCCAAACACCATCTAGGGCAAACTATCCTCCTTATGGAACAGATTTCATCGGAGGAGTACCAACTGGCAGGTTTTGTGACGGAATGGTTCCTTCCGATTTCATAGGTCAGAATCCTAGCTATATTTATAACTACTAATGCATATTAATATCTCTCAACATTCTTCTCTCTAGAATATATATCATACATTATCATATA…
66	Sa79F.143	ATGGTGTTTAGGTCTTCAAAATCCTCATCTCACTTCACATTGAAACCTAGACATAACACATTATCATTCTTGCCATCTCTGATTTTCTCTCTTCTCATTTGGAGCGGTGTGTTCTTTGCATCATCAGCGTTAGATATACCTGAAGATAGAAAGTTTCCGGCGTTAATTGCATTTGGTGATTCAATAGTGGATCCTGGAAACAACAATGGCTTAAGAACCCTAATCAAGGCGAACTTCCCTCCGTACGGGCAGGATTTCAAAGAAGGACCTACTGGAAGGTTTTGTAATGGGAAGGTGCCTTCTGACTTAATAGGTGAAAACTCTCTATAACTCATATACATTCTAATTAAACCCTATATATGCTGTCTCTCTTATTTCTTGCCATTACAATGTTAGTAG…
67	Sa7F.179	ATGTCTAACTTTCTTAGTTTTCTAACCATTCTGATCAGTATGATCAATCTTGTTCCCAAGATTGCTCTCAGCCAGCCACAAGTCCCATGCTACTTCATTTTCGGAGACTCTTTAGCCGATCCGGGCAATAATAATCTCCTCATAACTCAAGCTAAGGCTAACTATCCGCCTTATGGGATTGATTTTCCCAATGCTAAGGCTACAGGGAGGTTTTGCAATGGCCGGACCGTCGTTGACTTTATCAGTACTATAATCACTTTCCTATAAATCATCACAAGTCATGTACAACCTTAAAGAGTTAAGATGTGTTTTTATCTAACGTTTATGATATCATTTTGTAGCACAACAGTTGGGTTTCGTTGACTTGATTCCTGATTTCATCTCTGCTACTGGTTCCAA…
68	Sa7F.184	ATGGTGACAATGGGACAATTCAAGATTGTATTGATGATGATCATTCTACTGATTTCAATGACTAGTGTCGACGTTACTAAAGGTGTTGGAAGTAGGAGAATTAAGCCAGCAGTTCCGGCTATATTCGTGTTTGGAGACTCAACTGTCGATCCTGGCAACAACAACTTCATTGGGACTCCTTTTACTAGTGACTTCCCGCCTTATGGCCAAGACTTTCCCAATCACCAGCCAACCGGACGGTTCACCAACGGCCGGCTTGTCCCGGATTTCATAGGTAATATATGAAAAATGAATGATTCTTAAAAACTTCTCTCTATTGTTTGCATGAAGATATATATATGTGAATTGTAGGTTTAGTGTTGAGTAAAAAAAATTTCAAATATGTCAACTTAAACGTTT…
69	Sa7F.458	ATGCCTCCACCCATCTCCTCCACCGCCGCCATCCTCTACCTCATCATCCTTTCCTCCCCAGGTCAGTAACTTACTTCAATTGTATACTTATTATCTCAGTTATTATTATTCAGATCAGACTTGCAGGAGGAAATGGTAGATCAGTTGCAGAGGCCCGGCGGCGGCACATGCAGCCTCGCATTCTCGGACGCGATCTCTACGGTTTCAGACCAACAAAAATGTTCGTGTTCGGAGATTCATATGCTGACACGGGAAACAACAGGAAGACACTGGCCAACTCCTGGAAGGCTCCTTACGGTGTCACTTTCCCTGGTAATCCAGCCGGCCGTTACTCCGATGGCCGCGTCCTCACTGACTACATTGGTACCTGTTCTTAAATCTTACTACTAATCACTAATC…
70	Sa7F.504	ATGAATGCTAGAGTTGTACTGCTCCTACTGTTACATTCACTAACCCTGATCGGCCGGAGTTCCTGCCGCTCCGGCCGAATCAAATATTGTAACTTCCAAGCTATATTCAATTTCGGTGACTCAAATTCAGATACAGGAGGAAGATCAGCTGCATTAATGGAAATATCTTCACCTAATGGTGAAACTTACTTTCATTATCCTTCCGGTAGAGGCTGCGACGGACGTTTAATCATTGATTTTATAGGTACTGTCAATTGCTGCTAGTCAAAACGATCGAATTTCAATACATTTTTTAATGATATGAAAATGTTGGAATTGTTTTTTGTGGTGTAGCTGAGGAGCTGAAACTACCTCATTTAGATGCTTACTTGGATTCATTAGGGACTAGTTTTAGACACG…
71	Sa81F.175	ATGTTTGGATTCGTCTATGGTGTTTTTCTATGCCTTATGTTGTTAAGTGCCACTGCCTGTTCTCAAAGGCCGCGGACAACTCAAGCACAAGTTCCTGCCTTCTTCATTTTTGGTGACTCACTTGTTGACAATGGTAATAATAACAATATGCTTACTCTTGCTAGAGCTAATTATAGACCTTATGGCCTTGATTTTCCTCGTGGAACTACCGGCCGTTTCACCAATGGATTGACCTACGTCGACGCGTTAGGTAATTATCTACATGCGCGCATTACAGTACAATTGAAGAAATATCTCACATCGACTACAAAAACATTTCTTCTGAATTGCAGGCCAACTGTTGGGATTTCGGGAATTTATACCGCCTTACGCCAGAGCGAGGGGCCGCGGACTGATCAG…
72	Sa82F.57	ATGGCCGCCATGCATGTTCTTGCAGTTGTTGTCTTCTGCTTAACCAGTGCTGTTACACTTGCTGTCCCTCAAGTCCCATGCTACTTTGTTTTCGGGGACTCCCTAGCCGACCCTGGCAACAACAACAACCTTAAAACCATCGCTAAAGCAAACTACGCACCTTACGGTGTCGACTTTCCTGGTGGACCTAATCCTACAGGGAGGTTTACCAATGGCAGAACTTATGCAGACTTCATCAGTATGATGCTTACCACCTCGCAGCACGTTGCACTAGTTGTGTTAAATGTTAATGCATGCATGTTGATGTTCTGACAGCTCTTCTTTGTTGTGTAATATTGCAGCTCAGTCACTGGGTTTCACTTCCTTCGTCCCGCCGATTACTTATGCTGCTGTTGGAAA…
73	Sa84F.200	ATGGCGAGCAGAGGACTAATGGCTTGGCTGCTTCTGGTGGTGCCGGCAGTATTATTGTCTGATTTAAGCGAGTGCAAATGTGATTTCGAGGCTATATTCAACTTCGGAGACTCCAATACTGACACTGGTGGCTTCTGGGCTGCCTTCCCAGCTCAAGGTGGCCCTTACGGTATGACTTACTTTCAAAAACCGGCCGGCAGAGCTACCGATGGAAGGGTCATAACCGACTTCTTAGGTAAATTTACTGACCTTTTATTTCTTTCGATTTCCATCCGAATTGAGGTTTAGTAGTCTGCTGATCCGGTCTGTGTTTGTTTTGCTGCTACAGCTCAAGCCATTGGGATTCCATATGTGAGCCCGTATCTGCAATCTATTGGCTCGGACTTTCGCCATGGAGCC…
74	Sa86F.120	ATGACGTTGGGTTTGCTTATAGAGGTTATCGGAGCGGCGAGAAGTGGCGACAGGGGGTGTAACATTCCTGCAATTTATAATTTTGGTGACTCAAACTCCGACACAGGTGGCACATCAGCTGCATTTTTTCCAAGAGCATGGCCATCTGGTGAAACATACTTTAAAGAGCCAGCTGGGAGGACTTGCAATGGTCGACTCATCATCGACTTCATCGGTAAGTAAACAAATGACATAGCCTGAAGTCAACCTAAAGCGTTGACCGAACATGTTTTCGTTCTGGTCTGTTGAACAGCTGAGAAGCTCAAAGTTCCGTACCTGGACGCGTATTTGGATTCAGTAGCGACAAGTTTCAGAAGAGGTGCGAATTTCGCTACTGGAGGATCAACCATCAGGCAGCAA…
75	Sa92F.24	ATGTTACATGTTCTTAGCCAACTACGCGCAAAAATGGCATCTGACATTCTTTATCGTCTTCATACTCCGGTTGCTATTTTTATGTTACTCATATTTACAAACGCAGCCATTCGTAACACACACAATAATCGCTCGAAACTACGAGCAGCTTTCGTGTTCGGAGACTCGACGGTGGACTCAGGGAACAACAATTTCCTACTGACGGATTTTAGAAGTAATTTTCCACCTTATGGACATGATTTTGCTGGAAGTGAACCTACTGGAAGGTTTACAGATGGCCGACTTGTCACTGATTTTATAGGTTGTGATCTGTTCCTCCTCTCCTCGTACTTTTGTTCTTAGTATTGTTCGAATTTCATACTAAAATGTTTTTTAAACAACAATGCAGCATCATACGTC…
76	Sa95F.131	ATGCAACATTTTTCATCGAAAGTTTCATGTCTGGTTCTGACATTTAGCATAACACTTGTTGTTGTAATGCTGGATCAAAACAATGTTCATCATGTGGAAGCAAGAGCTTACTTTGTGTTTGGTGATTCATTGGTTGATAATGGCAATAACAACTTCTTGTTAACATCCGCACGCGCTGATTCTCCTCCTTACGGAATTGATTCTCCTTCTGGTCGTCCTTCTGGTCGTTTCTCCAACAGCCGTAACCTCGCTGACCTCGTAGGTAATAATAACATCAACCATTATGACTATGATTACTTTATGTTATTTTATAAGATAGGAGTAAATGATAAATGTTCCGTTGACTTTTTTGACTCACAGGGGAGAGGATTGGAGTAGCAGAAGTGCTTCCATACTTGA…
77	Sa99F.11	ATGGCAAAGTCTGTTTTTATCCATGTTTTCATGTGCATGTTCTTGTCCTTGATTGTTTTTGTGTCTCATGTTGCACTTGCGCCTGTCCCTCGAGTCCCTTGTTACTTCGCTTTCGGAGACTCCTTAGCCGACCCTGGCAACAATAACAACCTTCAAACCACCGCCAAGGTCAACTATCCACCGTATGGTATTGACTTCCCTGGTGGTGCTACCGGTAGATTCACCAATGGCCGGACTTACGTATATAGATCATATAATCATCTCTTAACACGTTCCATAAATTTTTCTCCATGTTTTAATTATTAAAGTCTACTAGGGTTACAGTTACACTTACATCATTCAAGCATGTTGTAATTATTTGAATATGTTTATTGCAGGTCAGTCATTAGGGTTCACTGC…
78	Sa9F.272	ATGTCAACTCACAATCAAACTTCCCTCCAACTACTTACCCTTCTCATCCTCCTCTCATTCTTTCTCCAACCCACATCAGCCCATAAAAAGAACAAAACTTCCGGTGGCGGCGGCGCGGGAGGTGCTGGTGGAAGTGGCGAGGTTCAAGTAGGAATGTCGTTACAAGGGAGTTTTTCACAGGTTATTGCATTTGGTGACTCGTATACTGATACTGGAAACTGCATGTTCATGAATGGGTTGAGAAGATTCTTTGGTGGAATTATTGCGAATTCTCCGTATGGTTCGATTTTCAAGAGTCCTAAGAATGGGAACAGATTTTGTGATGGGAGGTTAGTGATTGATTTTTTGTGTGAAGAGTTGGGATTGCCTCATTTGCCACCTTATAAGGATCCTAAAGTG…
79	Sa9F.31	ATGGCACTGATTTCCTCCACATACCAATTCATGGCTACTTTCACCATTATTACTGTTCATCTTTTGGTCTATATGCAGTTGGGGTATAGTCAAGGCGTAGCAGCCTTCACTTCATTTATCTTCGGAGATTCACTAGTGGACGTTGGAAACAATGACTATCTTTTTACATTGTCCAAAGCTGATTCACCTCCTTATGGCATCGACTTTGCACCTTCTGGACGTAATCCCACTGGCAGGTTCACCAATGGCCGCACTGTAAATGACATTATAGGTACTCAAACTCAAATCTCCACTTCCTCTATAAAAAAAAAAGTGTAAACTACATCTCAGTTTTACTCTATAAACAAGACACCTACACGAGAGCTTATACTTATACAATAGTATTGATATTCATAACTT…
80	Sa9F.81	ATGTCTTCTTTCAGCCATCCATCCCTCCAACTTCTCGCCATTCTCATCCTCTTCTTGTACCTCCTGCAACCAGCATTAGCCCATGACAAACCCAAACAAACGAGTACGTCGACAGGCGGTGGAGGCTCAGTGTCAGGAAGTGGTGACATTTCGGTGAAGGTGTCGTTACAAGGGAGCTTTTCTCAAGTCTTTGCATTTGGTGACTCGTATACTGATACTGGAAACTGTATCTTTTTAAGTGGAGTAAAGAAGCTTCTTGGAGGGAAGCTTCCACTGTCTCCATATGGACCACTTTTCAAAAGTCCATTGTCGGGGAATCGGTTTTGCAATGGGAGATTAGTGGTTGATTTCTTGTGTGATGCTCTTGGGTTGCCTCCATTGCCACCATTTAAGGATCCT…
