# Supplementary material for: Identification and expression analysis of the GDSL esterase/lipase family genes, and the characterization of SaGLIP8 in Sedum alfredii Hance under cadmium stress
Source: PeerJ. 2019 Apr 16;7:e6741. doi: 10.7717/peerj.6741 (PMC6474334; doi:10.7717/peerj.6741)
Supplement: Table S1 — qRT-PCR, Quantitative Real-Time PCR. The primer sequences were designed by primer 5. [file peerj-07-6741-s001.xlsx]

## Sheet: Sheet1
Table S1 qRT-PCR primer sequences
Gene name	Forward Primer Sequence (5’-3’)	Reverse Primer Sequence (5’-3’)
Sa0F.11	GGCTTCGTTTTTATGCAAC	CTAGTCCTTGAGAATGTAGT
Sa0F.223	GTATGTTAGCTGGGATGGCG	TCAGCCAATGCGATGTAAAT
Sa0F.262	GGATGTTTGAGATGGGTTA	CTACACCATAAACTGAGATA
Sa0F.41	TGTGGCAACATCGATCAGCA	TCAAACTCTTACTAATTGTT
Sa0F.898	GGCACAGGACTGCTTGAGAT	TCAGAGGAAGTATGCGTGGA
Sa105F.31	GTAAGAATGGGGCGTTAGTG	TCATATGAAGAACTGTCGGA
Sa10F.217	CATGTAAAGATGCGGACAAGT	TCAGTTGAACTCTGCTAGAA
Sa10F.441	CGAGTAAGTATGTGTTCTG	CTACACCATAAACTTTGATA
Sa110F.22	TTGGGACCGTTATCATCCGA	TCAAGCATTTGATCCAGCAA
Sa116F.110	ATATAAACTGGGATGGAATAC	TTAGAATTTAAGAGGCAAAA
Sa116F.65	TCAAGTGATTATTGCACCAG	CTAATGCTTATAACAAGCCA
Sa121F.27	CGTGTCGGAACCGTAGAGAG	CTACAGCTGAGCTAAGCGAC
Sa129F.2	GAGGAACGGTGAAGTATAA	CTAAATAGACTCATACAACG
Sa12F.49	CATGTAAGAGAGGAGATTCAGC	CTATTGGGTAGCTAGTGTCT
Sa136F.34	TTGTGGAGGGACTAAAAGTA	AATTCCTAAACAGATCTTTCA
Sa13F.102	GAGTATCTGTTTTGGGATGC	CTAGAGCTTAAGCTTAGCTA
Sa13F.118	CAACGGTGTGCAAAGATCCA	TCAAAATCGAGGGCTAGTGT
Sa14F.252.1	ATCCCATTTATGTTCTGACA	CTAAACCTTCAAGATTTGTT
Sa184F.22	AATGCCTTGCGCGAATAGAG	TCAGAGTTGAGCCAGTCTAC
Sa18F.151	TCATTTATCAGCTGGGATGG	TCATCCTTTTTGTTGCTTTT
Sa1F.117	CTCGACCTTCTTTTGGGACA	TTATTTGTGACTGCGACTCT
Sa207F.22	GGACAGGGCGAACGAGATAG	CTAGCGTATGGATGGAGCCA
Sa20F.120	TGTTCTGGGACAGTTACCAT	CTACGGTAGAATGTCAGTTG
Sa217F.43	CTATTTTGGGACGCATTCCG	TCAAAGTTGAGCCAGTCTAC
Sa248F.34	TGCAGTAGAGACTACGGTTT	TTAGAGCAGAGCAAATCCTT
Sa24F.223	GCTGTGGGAGTGGATTGATT	CTAAGCAAGACATTGACGGA
Sa24F.262	TATGTGTTCTGGGATGCTTA	TTACTTTGATGATGTTGGAG
Sa258F.41	CCGACGTCGTATTTGTGTTCA	TCAAAGCCCATTCAAAGCTT
Sa26F.146	ACGTGTAAGGATCCGTCGAA	TCAAAAAGCTGAAACTGGCT
Sa26F.158	ACCCTACTGAAGCTGCCAAC	TCATAGTTGAGCAAGACGGC
Sa27F.42	ATGGGGTGCATTACTCGC	CTACTGCTTGAAACATGCTC
Sa28F.36	TATCTTGTGTAGCGACTATG	TTAAAGGTAAAGCTTAGGAA
Sa28F.37	TAAAGACATGTTCGGACCCA	TCAAAAGTATTCTGCATAAATCTTT
Sa28F.38	CAGTCAGATTCAGACGACAT	TTAGAAAAAGTGAGGCAAGA
Sa28F.39	CATCGAAGTATGTGTTTTGGG	TCAGAAAAACTGAGGCAATA
Sa29F.188.1	GTTCCAATGCGTCGACATAC	TTAGAGCAGAGCAAATCCTT
Sa29F.343	TTTGAGATGAGCTACTTGT	TCAGAGGTAATATTCTTTGA
Sa2F.358	ACACAGTTTGTGATGATCCG	GAAGATTCTTCTCAAGGGTAG
Sa314F.6	CTTGCCGCTTCAAACACCAT	CTAGAGCTGAGCCAAGCGAC
Sa32F.165	AGGCAGTGGCTTCTCGATAC	TCAAAAGCTGGCCACAAACG
Sa33F.119	TGGAGATATTGAAGTATCGG	GTAAAATACAGAGATGTCTG
Sa36F.86	GCGAATGAGATCATTGCGAAG	CTAATTGGCAGGTGATGGAG
Sa39F.196	GGGATGGTGTTCATTTGACTGAGG	TCAGCCTCGGCCATGAGCTT
Sa39F.291	ATCTGGTGGGATCAGTTTCA	CTAGAGTTCTTGAGCTACCA
Sa3F.277	ACCGCTTGAAATGCCTTGTA	TTACATCTGCGCCATCTGTT
Sa3F.554	TAATTCTTTGTCGTGGGTA	CTTTAAAAAGATAGTCCAAATT
Sa42F.134	CCGTCTGATGCTGCAAATGT	CTATTTAGGCGATGGAGCCG
Sa45F.55	GAGGATGTTGTGGGACAGGG	CTAGCTGAGGAACCTTCTGC
Sa46F.118	ACCAATGCAACTCGGTATGT	CTACAAGAGTGAAATGCCCT
Sa46F.20	CTATTTGGAGGCTTCGTT	CTAGTCTTTGAGAATGTAGT
Sa46F.270	ATGCTCTTTGGAGGCTCATGT	TCAGTTGGAACGACAAGCTC
Sa46F.31	GGCCGTGTAGTAACCGTAGA	CTAGTGCTGAACTAAGCGAC
Sa47F.286	CCTGTTCAAATCCTGATAAAGT	CTAGTTCTTGAAACAAGCTT
Sa55F.146	AATGTTTGGCGAGTCTTGTT	TCATCCTTTTTGTTGCTCAT
Sa56F.143	TAAAGATGCGTCTAAGTATG	CTAATCCTTGAAAAGGTAAT
Sa57F.156	TTTCATCCAACTGAAAGAGC	CTAAACTCTTGAATCCATGG
Sa5F.25	CACCTGCACTGATGCAAACA	TCAGAGGAACTGAGCAAGAG
Sa5F.658	TTTTGGGACAACTTTCATCC	TTAATTAACTTTGGCCGATG
Sa64F.90	CTTGTTCTGATGCTTCACGCT	TCAGCAGAGCTTATCGCCAC
Sa66F.83	GGATTATGTTCATGCGACGG	TGCTGAAACATATGCAGATTT
Sa6F.163.1	AGATCTATACGTGTTCTGGGA	TCAAACAGTGGTGAAATCTT
Sa6F.233	CGATGAGAAATCGCGGTATG	TCACTGACAGAACGAGTTAA
Sa72F.20	TTTGTAATGTACTATCGCCG	TTACATGAATCTAGGCACTA
Sa79F.141	GTAAAGACATGTTCTGATCC	AGTAAAGTTTAGGAATAGCT
Sa79F.142	ATGCTGTGGCACTGGTAATA	TCAAAAGTATTCTGCGCAAA
Sa79F.143	ATAAATAAAGGGTGTTGTGG	AAATACAGAGATTTCTTTCTC
Sa7F.179	TGTTCATCCGACAGAGGTTG	TCAGATCAGGAGCTGAGTTA
Sa7F.184	TGTAATTCTAAGTCATGGGT	CTAATATCTGAAAACATCGT
Sa7F.458	ACTAGTGATTCATATTGCGG	TCAAGACAAGAACAAGTTTT
Sa7F.504	AGCTGGGATGGGATACATTAC	TTACCTCAAATCTTTGCGAC
Sa81F.175	ACAACGGGCAGATAACGTGT	AGCTAGCTGCTGTATATTTATCGGA
Sa82F.57	TTTTTGACAACATTCACACAAC	CTAAAGGGAAGCTAGTTTCT
Sa84F.200	GAAGCCGCAAACAAACTCGT	TCAGCTAAGAGGCTGCAGAT
Sa86F.120	ATGCTCTTTGGAGGCTCATGT	TCAGTTGGAACGACAAGCTC
Sa92F.24	AGGTGTGTTGGAGACATCGT	TCAAAGCCCATTCAAAGCTT
Sa95F.131	CTTGTGTCCGAACAGAGATT	TTAAGTTCGAGAATCCAACG
Sa99F.11	CCAAGCTGTGGCTGCTAGAT	AAACTTTCATTGCTTGTCCTCTC
Sa9F.272	GGAGCTGGAAGCACTGGTAAA	CTAAGCGCACTTGTTTCGCT
Sa9F.31	ATGCATATCATCCGACTG	TCAATAGTTATGAAGTCCAC
Sa9F.81	GGCCTCGGAATTTCAACTAA	TTAAGCACTCTTGCTTTTCT
UBC9	TGGCGTCGAAAAGGATTCTGA	CCTTCGGTGGCTTGAATGGATA
SaGLIP8	ATGGTGTGGTCTAACCTTGT	CTAGAGCTTAAGCTTAGCTAGG
