# Supplementary material for: Identification and expression analysis of the GDSL esterase/lipase family genes, and the characterization of SaGLIP8 in Sedum alfredii Hance under cadmium stress
Source: PeerJ. 2019 Apr 16;7:e6741. doi: 10.7717/peerj.6741 (PMC6474334; doi:10.7717/peerj.6741)
Supplement: Table S2 — The direction of conding sequences is from 5′to 3′. Sa, Sedum alfredii. [file peerj-07-6741-s002.xlsx]

## Sheet: Sheet1
Table S2 Conding sequences and amino acid of all genes
Conding sequences of SaGELP family
No.	Name	Sequence
1	Sa0F.11	ATGTCTCCCATTACATTATTGATGATTGTCTTCATTTCCATTTCCATGCTCATTTCACTGACTAAAGTCGAAGCTTTAACAAAGAGGAATCCATCAGTGCCAGCAGTTTTCGTGTTTGGTGACTCCACTGTCGATCCAGGTAATAATAACTTCATTGGTACAACTTTCAGGAGTGACTTCCCACCTTACGGTCAGGACTTGCCTGACCATATGCCCACTGGCCGATTCTCCGACGGCCGCCTCGTCACCGATTTCGTAGCTTCTTACGCTGGTGTCAAAGATTTCATACCACCTTATTTGAATCCTGAGCTCAGTTTGGATGAGCTGATGACAGGTGTCAGCTTTGCATCCGCCGGGAGCGGGTTCGACCCACTCACCCCACAAATCAGTAGTACATTA…
2	Sa0F.223	ATGAGAAGCTTTTGTGCATATCTATGTGTGTTGGTGCTCGCATTGTTGTTCCTAGGAGGACGACTAACCGAATCCAAATGCCAATTCAAAGCCATTTTCAACTTCGGAGATTCGAATTCCGACACGGGCGGATTTTGGGCTGCGTTCCCCGCTCAGTCCGGCCCTTTTGGTATGACTTACTTTAAGCGACCCGTCGGACGCGCTACCGATGGACGCCTTATGGTCGATTTCTTAGCTCAAGCGTTTGGGATACCATACCTGAGCCCGTATTTGCAATCAATCGGGTCGGATTTTCGTCACGGAGCGAATTTCGCCACGCTGGCATCGACCGTCCTCTACCCACAAACATCATTGTACGTGAGTGGTCTCAGCCCGTTTAGCTTGGGAATTCAAGTCAGA…
3	Sa0F.262	ATGAGAATTTTATTTTGCTTATGGATGTTCTCTACGAACCTCTTACTGATGCGGAATGTTCAAGCAAGTGGTAAAGTTCCAGCGGTGATTGTTTTTGGAGACTCTTCGGTAGATTCAGGCAACAACAATCATATCTCCACTATGCTGAGGAGTAATTTTGAACCATATGGACGTGACTTTAAGGGTGGTAAGCCTACAGGTAGATTTTCCAATGGGAAAATTCCGACAGACTTCATTTCTCAGGCGTTTGGTATTAAGCCTACTGTGCCTGCTTACTTGGATCCTGCGTATAACATATCACATTTTGCTGATGGAGTTAGCTTTGCTTCGGCTGGAACTGGTTATGATAACGCCACATCCAACGTTCTCTCAGTTATACCATTATGGAAGGAAGTGGAG…
4	Sa0F.41	ATGAGCCTCGATGCTTCAAATTCACTCATTATTGTGATCCTAACAACGTTGTTCCTCTCTTCATTCTCCGTCGTCGCTGTTCTTAAGCCAAGTGCACCAGCATTGTATGTCTTCGGGGATTCGTTGTTCGACAGTGGAAACAACAATTTACTTCCAACTCTAGCTAGGGCAAACTTCCCTCCTTACGGTGTTGATTTTGTGAACGGTGCTACCGGAAGATTCTCTGATGGAAAAACCGTAGCTGATTTCATCGCGGAATATTTGGGTTTGCCATATGCTCCGCCTTATATGACCATCAGAAGAAGATTTCATTTGGCCGGAATAAACTACGCTTCAGGCTCATGTGGTATTCTTCCAGAGACCGGAACCATCCTTGGGAAATGCCTTAACTTAAATGAG…
5	Sa0F.898	ATGTTCACACAGCATATATTTATCAAACATTCAACCATTTGTAGGCAGTCAAGGGATTCATCTAGTGCAACAATGTCATTACTACTGTACCTGTCATACATGTTTCTGACACTTGTGTCAGAAACTCAAGCCAGAGTGCCTGCCGTGATAGTGTTCGGAGATTCGTCGGTGGATTCGGGCAATAATAATTGGTACCCAACTCCTTTAAAGAGCAACTTTGAGCCTTATGGCAGAGATTTCAGTGGTGGAAAAGCTACTGGCAGGTTTTGTAATGGTAGACTTGGACCTGATTTTATATCTGAAGGTTTTGGACTTAAGCCAGTTGTGCCTGCTTATTTAGATCCCAGCTATACCATTGCGGATTTCGCTACAGGTGTAAATTTTGCCTCTGCTGGCACT…
6	Sa105F.31	ATGAAACTCTCTTCCTACCTCATTACCATTTTCTTGATTCTTGTACCATTCTTGTTGTCGCATGAAGCTGGTCTGGTTCTGGCAACAGAAAAACACGGTCGGTACAAGAAGGCATTGTTTGTGTTTGGTGACTCATTGTTTGATCCTGGTAATAATCAGTATTTAAATAGCAGCAGCAGCTCTCAACTTGGAACTGCTACTACTTGGCCTTATGGTGTTAATTACTTTCGCCGCCCCACCGGTCGCCTTTCCGATGGCCGCATTGTCCCTGACTTCCTCGCACAGTTTGCAAGGCTGCCGATTCTTCCACCATATCTCCAGCCCGGACCAAAGTTGTTGACGCTGGGAGCAAACTTCGCTTCTGCCGGAGCTGGCGTCCTGAGCGAAACTCACCCGGGA…
7	Sa10F.217	ATGACATCAACAAAAACAACACCATTTCAAACACATGCAGCTCAAGCTCAGCTGTTACTCATCTCCATATCTCTGATGATATTCCATTTAGCTGATGTTAGTAGTAGTAGTAGTAGTAGTAATAAGGTTCCGGCGATTGTTGTATTCGGAGACTCATCAGTTGACGCTGGTAACAACAATCAAATCTCAACTGTTCTCAAAAGTAACTTTGAGCCTTATGGAAGGGATTTTATAGGAAGCAAACCAACTGGAAGATTCTCTAATGGAAGAATTCCTCCTGACTTCATATCCGAAGCTTTCGGTCTTAAACCCATTGTCCCTGCTTACTTGGATCCAAGCTATAACATTGCTGATTTCGCTACTGGTGTTTGTTTTGCATCAGCTGGCACTGGCTTCGAC…
8	Sa10F.441	ATGAAGATTTTATTTATCTCATGCATGTTTTTATTGAACCTGTTACTGATGCAGAGTGTGGAAGCTAGTGGAAAAGTTCCGGCAGTGATTGTTTTTGGAGATTCTTCGGTTGATTCAGGGAATAACAACCATATCTCCACGATGCTGAGAAGTAATTTCGAGCCGTATGGGCGTGATTTTCAAGGTGGTAAAGCTACAGGAAGATTTTCCAATGGAAAAATTCCAACAGATTTCATTTCTCAAGCTTTTGGAATTAAGCCTACTGTGCCTGCTTACTTGGATCCTGCATATAACATCTCACATTTCGCTGATGGAGTTTGCTTTGCTTCCGCCGGAACTGGTTATGATAACGCAACTTCCAACGTCCTCTCAGTTATACCATTGTGGAAGGAAGTAGAG…
9	Sa110F.22	ATGGGGAACTTGAGTGCATTTGTGTGCAGAGTTGTGATATTTAACTTTCTGGTTTCTTTAACTCTGAAAAGTACTGATGCTGAAGATTTGCTTCCAGTTTTCGTATTTGGCGATTCGACTGCAGATGTTGGGACTAATGATTTTCTACCAGAATGTCAAGTTAGGGCTGATGTTCTTTACAATGGGATAGATTACCCTTTGCAAGTCCCAACTGGAAGATATAGTAATGGCTATAATACACTAGATTTTATTGCAATGCTTTTGGGTCACAACGAAAGTCCATTGCCATTTTTGAATCTTTCGTCGATGGCCATGTCGAATTTCAGAGAAGAAATCCTGCAAGGAGTAAATTTTGCATCCGGAGGTTCAGGAATTCTTAGTGATACTGGGAAACAATTT…
10	Sa116F.110	ATGGCCGCCCCAAGCTCCCCCACTCACATCCTCTTCCTCCTATTTGCATTTGTTTCAGTATGCATTCACAATGTCATATGTTACGACTTTAGCCATCCAGCCATTTTCAACTTTGGTGACTCTAATTCTGATACAGGTAACCTTGTTGCTGGAATTGGTGCTCATCTTTATCCACCCAATGGTCAATCTTACTTCAAGATTCCTTCCGGGCGCTTCTCCGATGGCCGTTTAATCATTGATTTTTTGGCTGATGCTATGGACCTGCCATTTTTAAATGCTTATTTGGAAGCAGTTGGAGCACCAATCTTTCACAAGGGGTGTAACTTCGCAGCTGCAGGCTCTACAATTCACCCTGCAACGGTTACATCCGTCAGTCCGTTTTCATTCGGGATTCAAGTC…
11	Sa116F.65	ATGCTCATCGTCACGGGACAGTTTGATTGGTATTGGATTTATCTGGCAGATTTCAAATACCCAGAAAAATCCTCAAAGAGAGAGTTTTTGCAGATTTTCATCACTCCATTTCAGCACCATCTTGCTACCTTCCCCATTCTCCTCAAGCTACATTTTTCAGTTTCAGGCATGGAGTTTTCTAGCTCAGTTGTTAGTACCCTTTTGGCCTTGTTATGGTTCTCTTGTTCAAAATTAGTAACTGCGCATTCCGGTAAGGAATGTAAGTTTCCGGCCATTTACAACTTTGGAGACTCCAATTCAGATACTGGAGGTTTGTCAGCTGCATTTGGCCAAGCTGGCTACCCTGCTGGTATTACCTACTTTCACCACCCTGCTGGCCGGTATTCTGACGGCCGTCTT…
12	Sa121F.27	ATGGTGTCTGATCCTGTGTTTGTGCTGTGTTTGGTGCTCACTTTAGGTTTTGGTGTAGTGTTTGCTGACCCACAAGTCCCTGGCTACTTCATTTTTGGTGACTCTTTAGTAGACAATGGAAACAACAATAACATTGCATCTTTAGCTATGGCCAATTACTTACCTTATGGTATTGATTTCCCTCGTGGACCGACCGGCAGATTCTGCAATGGAAAAACCACCGTTGATGTCATCGCTGAGCTTCTTGGCTTCTCCGATTACACACCGCCTTTCGCTAGCGCTAGGGGCAGAGCTGTGCTCCAAGGGGTTAACTATGCGTCGGCCGCTGCCGGCATTCGAGAAGAAACTGGCCAGCAACTTGGTCAAAGAACTCCATTCAGTGGACAAGTGAGAAACTAC…
13	Sa129F.2	ATGGCGACACAATCCATCCTCACTACATTTCTGATCATTTTATCAATCTCAACTTGCAGCATCAGAAGTGTTCTTAGCCAAGAAGCTTTGCCCGGAACCAATAAAGCCTTGTTCATCTTCGGAGATTCTTTATACGACGCCGGAAACAATGTCTACGAGCCTAACAACAGTCATATTAATTACCACCCTTATGGCAGAACATACTTCAATAACACTCCCACCGGACGTGTTTGCGACGGACGCATCATACCTGATTTCATAGCGGACTACATGAAGATACCATTCATAAAGCCATATTCCCAACCTGGATTCACTAATTACACTGATGGAGCAAACTTCGCATCTTCAGGATCTTCTGTTCTTCCTGAAAGTCGCCCGTCGTCAACATATCTGGCTCTG…
14	Sa12F.49	ATGGCCATGAATGCTCTTGCAATTGCATCCATTGTCGTCTGCTCGTTCTTCATTGCTTTCTTCACCAATGCTGCACTTGCCGATCCTCAAGTCCCATGCTATTTCGTGTTTGGTGACTCCCTAGCTGATCCTGGCAACAACAACAACCTTAAAACCATCGCTAAAGCTAACTACGCACCTTATGGAGTCGACTTTCCTGGTGGTGCGAATCCTACCGGAAGGTTTACAAATGGCCGAACTTACGCTGACTTCATCGCTCAGTCGCTTGGTTTCACTTCCTTTGTACCGTCGATTGCCAATGCTGCTGCTGGAGAGTTCATTGGTGTCAACTATGCCTCTGGTGCTGCTGGAATCCTCGACGACACCGGCAAAACCAATGGTGACAGGATATCGCTTGGA…
15	Sa136F.34	ATGGATGGCAGTGTCAGCCACCTCCTCCTCATGTTCAATCTCTCTGCTATCTTGCTACTGTTATCGTCGACGTTTTACAGACCGTGTAATGGCCGAGAACATCAGAAGCCTAAAGCAACTGCTTTCTTCATTTTTGGAGACTCTACAGTTGATCCAGGCAACAACAATTACATAACCTCAAACCCAGAGAACAGAGCTAATTACAAGCCTTATGGTCGAAATGGTTTCTTTGCTTACCCAACCGGCCGCTTCTCCGACGGCCGCATTTCTGTCGATTTCATCGCTGAAAAGGCCAACCTGCCACTGATTCCTCCCTTTATGCAACCGTTCGTCGATCGAACCAACGGAGTTAATTTTGCATCCGGTGGCGCTGGAATCCTTCCCGAGACAAATCAAGGA…
16	Sa13F.102	ATGGTGTGGTCTAACCTTGTGTTTGTGCTAGGGTTGGTACTCACTTTGAGTTTTGAGCTAGTGTTTGCTGACCCACAAGTCCCTGGCTTCTTCATTTTCGGCGACTCATTAGTAGACAATGGGAACAACAATAACCAACCATCTTTAGCTATGGCCAATTACTTACCCTATGGGATTGATTTCCGGCCTCCCGGACCAACAGGGAGGTTCTCCAATGGAAAGACCACCATTGATGTCACATCTGAGCTTCTAGGGTTCTCTGATTACATTCCTCCTTTCGTTACGGCCAGGGGCAGAGCTGTGCTCAAAGGAGTCAACTATGCATCCGCAGCTGCCGGCATTCGAGAAGAAACAGGCCAGCAACTTGGTGAAAGGACACCATTCAGTGGACAAGTGAGA…
17	Sa13F.118	ATGAGAGCTATGGTTATTTATCTATTAGGAATTGTCAGTGCTGTATGTTGTTCCTTGATTGCAGATCATGGGTCTGCAACTTCTCCATGGCTCACTTATCAAGCTATTTTTAACTTCGGTGATTCATTATCCGACACTGGAAATCTCATTCTATCCGGCACTGGTACATTTCCAGCTGCGGCTGCTAAGCTTCCCTATGGTGAAACTTTCTTCAAACAACCAACTGGACGTTTCTCAGATGGTCGTCTAATGGTAGATTTCTTTGCTGAGGCATCAGGCATTCCATATTTGCAACCGTATCTTTCACTTTCAGAAAATCAAAGTGTGCCAAATGGAGTCAACTTTGCTGTTGCTGGAGCCACTGCACTTGATTTCGACTTCTTTGTCAAAAAGAATCTT…
18	Sa14F.252.1	ATGTGCAAGCTTTTATACTCATGTTGGTTAGCTCTGACAGTTTACTGTGTTTCAGATATTTGCTTGGCCAGTGAAGTTCTTCCTGCTATGTTTATATTCGGAGATTCGATTCTTGAAGTTGGGAATAACAATTATATTCCTTCGTTATCTAAAGCTAATTTTGTACCCAATGGTATTGATTTTGGCGGACCAACTGGAAGATTCACAAATGGTAGAACAATCATCGACATCTTAGGCCAGCAGATCGGCGTTGATGGGTTCATTCCACCTTACCTTGCTCCAACTACAACAGGACCTGTGATTCTTAAAGGTGTCAATTATGCATCAGGTAGCGGTGGAATTCTCAAACAAACTGGAACTTTATTCATTGCGAATATCAACATGGATGAACAGATTGAT…
19	Sa184F.22	ATGAGATTGTATATTAGTTATTGTGCTGTGCTGTTGGTTCTGGCTTTGAGCTTCTTTACGCTTTTGGCTGAACCTCAAGTCCCGTGCTACTTTATCTTTGGTGACTCATTGGTTGATAATGGGAACAACAATGCTATTGCATCTTTAGCTAGAGCAAATTATTTTCCGTATGGGATTGATTTCCAATATGGGCCAACGGGAAGATTCAGCAATGGCTTGACTACTGTTGATGTAATCTCGAGGCTGTTGGGTTTTGAAAATTACATCCCGCCGTTTGCAAGTGCTGGTGGCGAAGAAATCTTGAGAGGTGTCAACTTTGCATCAGCTGCTGCAGGAATCCGTGAAGAAACTGGCCGGCAGTTGGGCGCACGAATCCCATTTAGCGGCCAAGTGAGAAAC…
20	Sa18F.151	ATGGCGGCTCTACGGACATTTCTCGTCCCACTTTTGCTACTCTTCTACTGCTGCATTTCAGCCAGCCTGAATGCGCAGTACCAGAGAAGCAGACAAACTAAAACATGCAAATTTCCAGCCATTTTTAACTTTGGTGATTCTAATTCAGACACTGGAGGGATCTCTGCTGTGTTTTATCCGATTGTCGCGCCTTACGGACAGACATTCTTTAAGAAAGCTGTGGGTCGAGCTTCCGATGGTCGACTCATGGTCGACTTCTTTGCTGCCGGACTAGGCTTGCCGTACTTAAGTGCGTACCTGAATTCAGCTGGAGCAAATTACCACCATGGAGCCAATTTCGCAACAGGAAGCTCCACCATCATGATGCCTAATGAAACATTTTTCCGGGGAGGACGAAGC…
21	Sa1F.117	ATGGCAGCGTGGAACGTGGTCAAAGGAGCAACTGTAAAATCCGGTCGGAAACAACATAGTTCCTTGAAGCTTTTTGTTTTCGGGGATTCTTATGCGGATACTGGTAATTGGGGTGAAAATGATGCACCGTCTTGGAAGCAGCCTTATGGCATAAGTTTCCCTGGCAAACCATCCGGCAGGTTTTCTGATGGTCGCGTCTTAACTGATTACATTGCGTCGTTTTTGAAGATCGAGTCTCCGGTGACGTACCGGAGAAGAAATAGCAATGCGGAGAATTTAAAGCATGGGATGAACTTTGCTTACGGAGGGACTGGCGTATTCACTACATATGCTGTGAATGCACCGAATATGACTACTCAAATCAACCAATTCCAGCAGTTACTTGAGGATGAAGTTTAC…
22	Sa207F.22	ATGGTGAAAATGAAGTTTGAGGTCACTCTGGTGGTGATGTTACTTGGTTTATTTACAGAGGCGGACGAATGTGAAGGTAAAGTTGTGCAGTTCATCTTCGGAGATTCGTTATCTGAAGTTGGTAACAACTTGAGACTACCCAAGAGCTTAGCTAAAGCCAGCTTACCTTGGTATGGCATTGATTTTGGAAATGGAGTTCCTACCGGAAGGTTTTGTAACGGCCGCACCGTTGCGGACATTTTAGGCGATGAAATGGGATTCCCTAGACCACCGCCGCTTCTAGACCCAGACATTACTGAGGATGCTATAATCAAAAACGGATTAAGTTACGCGTCCGGAGGAGGCGGCATTTTGAATGAATCAGGCACCCTATTTATACAAAGATTTTCGCTGTGGAAG…
23	Sa20F.120	ATGGGATCTGTATCCTTTCGTAAGGGTTCAAATTCTAAAACATGCGCAAAATCATGTTTGTGTGACACTCGGTCGTGTTGCGTATTTTGTGTGACACTCATTTGGCATGATACCTCTTTAGTCAAGTATGTGCTACTTAGAAAGACAATAACACAGCATAGAAAAACCATGTTCAGATTTCCAAAAATCTTGTTTCAAGTTGCAGCATTTAATCTTCTTATCAGCTATGTCCATCCACTTTTGAAGCTACCAGAAAATGTAACCATTCCTGCTGTTTTCATCTTCGGTGACTCCATCGTCGATACCGGTAACAATAACCGCCTCAACACCATCGTGAAAGCCAACTTCAAACCATATGGAAGAGATTTCAAAGATGGAAAATCTACTGGCAGATTTAGC…
24	Sa217F.43	ATGAGGTTGTATTTGAGTTTTTATGCTGTGGTGTTGGTTCTGCCTTTTAGCTTTTTCAAGCTTCTGGCCAAACCTCAAGTCCCGTGCTACTTTATCTTTGGTGACTCGTTGGTTGATAATGGGAATAACAACGCTATTGCATCTTTAGCTAGAGCAAATTATTTTCCCTATGGAATTGATTTTCAAGATGGGCCAACAGGAAGATTCAGCAATGGCTTGACCACTGTTGATGTTATCTCGAGGCTATTGGGTTTTGAAGATTACATACCACCATTTGCGAGTGCTGGTGGCGAAGAGATCTTGAGAGGTGTCAATTTTGCATCAGCTGCCGCTGGAATCCGCGAAGAAACTGGCCGACAGTTGGGAGCACGAATTCCATTTGGTGGTCAAGTGAGAAAT…
25	Sa248F.34	ATGGCTTCAGTTCATTATCATTTTGCTATTTTTGTGATTTTGATCTTGGCATGCAGTTTTGCTAATGCACAAGACTCGACCACATTGGTATCAGCTATCATCACTTTTGGCGATTCAGCTGCTGATGTTGGTAACAATGACTACCTTTACACTATCTTTAAAGCTAACTATCCTCCTTATGGCCGTGACTTCGCTGGCCATAAGGCTACCGGTCGCTTTTGCAACGGCAAGTTGGCCACCGACATCACCGCTGAGACTTTGGGGTTCACGAGCTACGCACCACCGTATTTAAGCGGACCATCAGGGAAGGAACTTTTACTGGGAGCTAATTTTGCGTCAGCTGGATCTGGCTACGATGACAAGACAGCATACTTAAGTCATGCGATTTCATTGTCACAA…
26	Sa24F.223	ATGGACGCATTGTCCATCGCACTATTTCTCATACTCATACATTCCCCGTTGACCATCAAAGTCAACGCCAATCACCACCTCCAACTGATCTCACCACCCTTCCCTACCATTCTAGTCTTCGGCGACTCCACCGTCGACACCGGCACCAACAACCACATTCCCACCGTCTTCCGCAGCAATCACTTACCCTACGGCCGAGACTTCCCTAACTCAATCCCAACCGGTCGTTTCTCCAATGGCAGACTCTCTGTCGACATGATCGCAACTTCACTAAAAATCAAAACTTTTGTCCCTCCTTTCCTTGACCCGCATTTATCCACTTTAGATCTGATCACCGGCGTCAGCTTCGCATCCGGCGGATGCGGATTTGATAACACTACTGGCCTTCTTGTTTCAGTC…
27	Sa24F.262	ATGGCGGAGAAGTTTGGAGTTGTGATTGTTACAATGTTGGTGATTTTAGCAGCAATGGAGACCGGAACAATGGCGGTCGGGTCGTCCAAAACTGTAACCTTTGTGTTCGGTGACTCGCTTACTGAAGTTGGGAACAACAATTATTTGCAGTACTCATTGGCGAAATCAAACTTTCCATGGTATGGGATTGATTATCCCGGCGGAAAGGCCACTGGAAGATTTACTAACGGAAGAACCATCGGAGACATCATATCTGAGAAGCTTGGGATTGTCTCTCCGCCGCCGTATCTTTCCCTGTCCGCTACCGACGATAAAATGCTTGGAGGAGTGAATTATGCGTCTGGAGGAGCAGGGATACTTAACACCACCGGTGTTTACTTTGTGCAGAGACTTACCTTC…
28	Sa258F.41	ATGGCATCTGACATTCTTTATCGTCTTCATACTCCGGTTGCTATTTTTATGTTACTCATATTTACAAACGCAGCCATTCGTAACACACACAATAATCGCTCGAAACTACGAGCAGCTTTCGTGTTCGGAGACTCGACGGTGGACTCAGGGAACAACAATTTCCTACTGACGGATTTTAGAAGTAATTTTCCACCTTATGGACATGATTTTGCTGGAAGTGAACCTACTGGAAGGTTTACAGATGGCCGACTTGTCACTGATTTTATAGCATCATACGTCGGCATCAAAGATTACATACCTCCTTATTTAGATCCGACGCTCGACGTTGAAGATCTCAAAACCGGAGTTTGTTTCGCTTCAGCTGCTACTGGCTTTGATCCTCTAACAGCCAAACTCAGC…
29	Sa26F.146	ATGGAGTTTTCTAGTATCATTTTCTTCATCTTCTTCTTCTTTAGTGCCACTGTTACATTTGCTGCACCAGTGTCACAACAGCAGCCGTATGAGTCCATTTTCAACTTTGGTGACTCACTCTCTGATGTTGGAAACTTGATTCTAGCTAACCCTAAGGCCTTTGCTGTTGTGGGCAAGCTTCCTTATGGCCAAACCTTCTTTGGTCGTCCTACTGGCCGCTGCTCCGATGGCCGTCTCATTGTTGATTTTCTTGCTGAGGCTTATGGGTTGCCATTCATGCCACCTTATTTGAACATTTCAAAACCAGAACAAGGCCTTAAAGGTGCTAACTTTGCGGTGGCCGGAGCTACAGCTCTTGACAAGGATTTCTTCAGTAAGTTGGGTATTGGCGGCTTGCTA…
30	Sa26F.158	ATGGAGTTGCATGCGAGTTATTACTGTGCTGTGATGCTTGGTTTGTGTTTGAGTTTTTGCAATGTTTTGGCTGAGCCTCAGGTTCCTTGTTACTTTATTTTTGGTGATTCGCTGGTTGACAATGGGAACAACAACGGCATTGCGTCTCTTGCTAGAGCTAATTATTTCCCATATGGGATTGATTTTCAAAATGGACCGACTGGAAGGTTCAGTAATGGCTTGACTACTGTTGATGTCATCTCTAAGTTGTTGGGTTTTGAAGATTACATTCCATCGTACGCCAGTGCGAGTGGCCAACAGATTCTGAGAGGTGTCAATTATGCATCAGCTGCTGCTGGAATACGCGAAGAAACTGGCCAGCAATTGGGTGCACGAATCCCATTCAGCGGACAAGTGAGG…
31	Sa27F.42	ATGGGTGCTTTCAGGATTACCTTCTCTGGGTTTGTCATTTTCATTTTCTACGTTGCAATTTCTGTAGCTGATGCGGTGGATTCCGTATGTAACTTTCCAGCCATTTATAACTTCGGCGACTCCAATTCCGACACCGGAGCAATATCTGCCGCTTTTCTTCCCATCCCGGCTCCTTATGGTGAGTTGTTTTTCAAGAAACCAGCTGGGAGGGACTGTGATGGCCGCCTTGTAATTGATTTCATAGCTGAGCGGTTGAAGCTGCCTTATTTGAGTGCTTACTTAGACTCAATCGGAACAAATTATAGACACGGAGCTAATTTCGCCACCGGTGGATCTACAATTCAGAAGCCAAATGAGACTATTTATCAGTACGGCATCAGTCCCTTTTACCTTGGGATG…
32	Sa28F.36	ATGGAGTTGCACCACCACTTTTCTCTCTCTAATAATTCTTCATGTATTGGAACCCTACTAGTTTGTTTTAGTGTTCTCTTATGTTGTGTTGGAGTGCAATCAGTACTAGTACTTGATATCCCTGAAAGTCAGAGGTTTCCGGCCTTGTTGGTATTCGGAGACTCGATCGTTGATCCTGGAAACAACAATCATATGGCTACACCATCAAGAGCTGATTACCCTCCTTATGGCCAAGATTTCCTAGGAGGTAAAGTTACTGGAAGATTTTCTAATGGCAAACTCGCAACTGATTTTATCGCTCAAGAACTCTCCATTAAAGAGACTTTACCTGCATACCTAGCCGATGACTTGCAGTCATCAGATCTTCCCACCGGTGTTAGTTTTGCTTCCGGAGGTTGT…
33	Sa28F.37	ATGTATACTCATACAATTCAGTGTGAAGTTCTAAAAAGCATACAATCTAGGGCTTCCTTAATTAGCAAATTGTGGCTTGTATTATTTTGCACTGGATTGCTCTTGAGCTTCTCTCATGTTCAATCCAAACTTCCGTTACCTAAAGATATTAAGTTTTCAGCATTGTTAGTATTTGGAGATTCGATTGTCGATCCAGGCAATAACAATAATGTCCATACACCATCTAAGGCAAACCATCGTCCTTATGGAAAGGATTTCATCGGAGGAGTACCCACCGGCAGGTTTTGCGATGGAATGGTTCCTTCCGATTTCATAGCTCAAGCACTATCAATAAAACAGTTGCTACCAGCATATTTGGACCCCAATTTGCAACCATCTGATCTTCCTACAGGCGTAAGT…
34	Sa28F.38	ATGGATCCGATGTTTTTCAAAAACTCCGGAATCCGGTCACTTAATCGTTACACAAATGCACCATTGCTAGCTTTTTACTGTGTTTTTTTCTTGTGTAACGATTGCATAGAGTCACGTTTAGATAAACAATTTCCAGCATTGCTAATGTTTGGTGACTCAATCGCTGATCCCGGCAACAACAACAATTTGTTGACGGTGTCTAAGGCTGACTATCCGCCGTACGGTAGAGATCTTAAAGCCGGAGTCCCGCTTGGGAGGTTCTCTAATGGAAAATGCTCCGGTGACTTTATAGCTAGTGAACTATCGATCAAAGAGTACTTACCGGCGTATCATGATCCAAGTTTGCAACCTGATGATCTCCTCACCGGCGTCAGTTTCGCATCCGGCGGCTCTGGTTAC…
35	Sa28F.39	ATGGAATTCGGTTCTACCAAAAACTCCGGATTTGCAGCAGTGCTTGTGATGGTCATGGTTTTCTCAAAGTGGACTTGTGTGGAATCGGTTATTAGCATACCTGAGGATAAAAGGTTCCCTGCTTTGGTACTATTTGGTGACTCTATCGCCGATCCCGGAAATAATAACAATATGTTAACCACCGCAAAGGCGGATTTTCCACCGTATGGTAAGGATTTCAAGGGTGGTGTTTCATCTGGGAGATTCTCTAACGGAAAGATTCCGGGGGACTTCATAGCTAGTGAACTATCGATCAAGGAGTACCTGCCGGCATACCGTGATCCAAATTTAAAACCAGCTGAGCTACTCACCGGCGTCAGCTTCGCTTCCGGTGGCTGCGGATACGATCCACTCACATCC…
36	Sa29F.188.1	ATGGGCTCAGTTCATCATTTTGTCATTGCTGTGACATTAGTATTAGCATGTACATCTGCTTATGCACAAGACTCGACCACATTGGTATCTGCTATCATCACTTTCGGTGATTCAGCAGCTGATGTTGGTAACAATGACTACCTTTACACTATCTTCAAAGCTAACTATCCACCTTACGGCCGTGACTTCGCCGGACATAAGGCTACTGGTCGCTTTTGTAACGGCAAGTTGGCCACTGATATCACTGCTGAGACATTGGGGTTCACAAGCTACGCGCCGCCGTACCTGAGCGGACCGTCCGGGAAGTCACTTCTCTTGGGTGCAAATTTTGCGTCAGCTGGCTCTGGCTACGATGATAAGACTGCTTACCTGAGTCATGCGATTTCTTTGACGCAACAA…
37	Sa29F.343	ATGGGATTAAGCGTCAGGTCATATTTGCTCTTCTTCTTGCCATGTATCTTACTGTTACTGATACAAAGCGTGGAAAGTGAAGTCAAAAAAATCCCAGCATTGATAGTTTTTGGAGACTCTTCCGTGGATTCTGGCAATAATAACTGGTACCCAACTCCACTCAAGAGTAACTTTGAGCCTTATGGCCGAGACTTCATCGGTGGAAAGCCTACTGGAAGGTTTAGCAATGGCCGTGTAGCTCCTGATTTAATGTCTGAGGCATTTGGTCTTAAGCCCCTTGTTCCTGCTTATTTGGATCCTAGTTGTACCATTGCGGATTTCGCTACTGGCGTCAACTTTGCCTCTGCAGGCACTGGTTTCGACGAAGCCACCTCTCAAGTACTCAACGTGATACCACTG…
38	Sa2F.358	ATGTCGACACCAGTCCTCTGCCGCACCGTCTTCCTCCTTTTCCTGTCCTTTGCAGGAAATGGTGCAAGTGTAGTAGAAGCTCGTCAACACAGATTTCAAACCCCGAGTAAGCTATTCGTGTTCGGAGACTCTTATGCCGACACTGGAAACACCAACAAATCCCTAACCAGTGCCTGGAAAGTCCCTTATGGAATCACATTTCCTGGTGTACCTTCCGGACGTTACTCCGACGGCCGTGTTCTCACTGACTACATCGCTCGATTTCTTGGAATCAAATCCCCTGTTCCATACAAAGTCATGAACAGCGGTCCCAAGAGAATCCAACATGGTGTGAATTTTGCTTATGGTGGTACTGGCGTGTTCCAAACCGCTTCTTCAGATCCAAACATGACTACTCAG…
39	Sa314F.6	ATGGCTTGTTGTGATCTTATGAAAATAATGTTGGTTTGTGTGTTGGGAGTGATTTTTGCCTTAAGTTTTGAGGTATTGGCTCAAGCTCAACCAGCTCAAGTGCCAGGCTACTTCGTCTTTGGTGACTCTTTGGTTGACAATGGGAACAACAATAACATTGCATCCTTGGCTATGGCCAATTACTTTCCTTATGGAATTGATTTCGTACCTCGGGGACCGACCGGAAGGTTCTCTAATGGCAAGACCACTGTCGATGTCATCTCTCAGCTTTTGGGACTCCCAAATTACATACCACCTTTCTCAAGGGCAAGGGGGAGAGCTGTGCTGCAGGGCGTCAACTATGCGTCCGCTGCTGCTGGTATCCGAGATGAGACAGGCCAACAACTTGGTGCAAGGACT…
40	Sa32F.165	ATGTATTCTAGAATGCTTAGTGTTTTTGTAATGTTGTGTTTACTTATGCACATTGTGCCAAGGTCGGCGGACTGTGCGCCTGAAGTACCTTGTTACTTTATTTTCGGTGACTCGATGTTCGACGTTGGGAATAACAATTACCTTCTGTCACAAGCTAAAGCAAACTACCTACCTTACGGCATTGATTTTCCTAAAGGACCTACTGGACGCTTCACTAATGGCAAAACAATTGGCGACTTCATTTCTTCTTATCTTGGTTTCACTGATTTCATCCCACCTTACATGGCGGCGACCGGTCGTAGAATCCTCAAAGGCGTCAACTATGCCTCCGGTGGATCGGGTATTCTGCCCGAGTCCGGTAAAACACAGGGTGACAGGTTTTCATTTCAACGGCAAGTC…
41	Sa33F.119	ATGCTATTAGAGAGCACCTTATCATATCTCCAAAAGGCTTCAAAAATGGTGCTAGGGTTTTCAAAATCCTCATCTCACTTCACATTGAAACCTTTCCATAACACATTAGTACTTTCCTTGCCAACTCTAGTTTTCACTCTTCTTATTTGGAGAGACACGTTCCTCGCATCAGCAGTAGATATACCTGAAGATCAAAGGTTTCCGGCGTTACTTGCGTTTGGTGATTCGATCGTTGATCCTGGAAATAATAACGGGTTAAAAACCCTAATCAAGGCGAACTTTCCTCCCTATGGACAGAATTTTAAAGATGGACCAACTGGAAGGTTTTGTAATGGGAAGGTTCCTACTGACTTAATAGCTGAACGACTACAAATCAAAGAACTTATCCCAGCATATTTG…
42	Sa36F.86	ATGAAATCAACGAATAAGTCTCTGGTGATGGTATTAATGATAGCGGCGCTGACCATAGGTTGCGAGTGTAAAGTGGTACAGTTTATTTTTGGTGACTCGCTTTCGGATGTTGGGAATAATGATAAGTTGCCTAAGAGTCTAGCTAAGGCTAATGTGCCGTGGTACGGTATCGATTATGGTAATGGTATGCCTAATGGAAGGTTCTGCAATGGCCGAACTGTGGCTGACATTATTGGTGACAAAATGGGTCTTCCAAGACCGCCGGCATTTCTAGACCCTGCTTTAGACGAAGACACGATTCTCGAAAAGGGTGTGAATTTCGCGTCAGGTGGCGGCGGAATCCTCAACGAAACCGGCGGTTACTTCATTCAAAGATTGTCACTATGGAAACAAGTTGAA…
43	Sa39F.196	ATGCGTTATTTTCAGTGTTATATTTTCATTTCCATGATTACCCTTTTCCTACTCTCACACACACTCTCCTCAGCCGCAGCTCCAAGCCCCAAGCTCCAAACCCAACCCTTCTCGAGGATACTCGCCTTTGGCGATTCCTTTACCGACACCGGCAACACTCGCTCCTCCACGGGTCCAACCGGCTTCCAACATGTCTCCAGCCCGCCATACGGTGTCACATTCTTTCACAAACCCACCAACAGATATTCAGATGGCCGTTTAGTGATTGATTTTGTAGCTGCTTATCTCAACCTCACATTCATCCCACCTTATTTAAACAAGAAAGCCGACAAGTCACACGGTGTAAACTTTGCGGTTGCCGGAGCTACAGCTTCAAGCTTTGAGTTCTTCAAGAGAAAC…
44	Sa39F.291	ATGTCACCGGCGGCAGCCAGTTTCATCGCCGTAATCCTCATCCTCGCCAGCGCAATTCTCCGGCGAACAAATGCCATGCAACCATCCACATTCAGCCAGAACACTACAACCTCCGTCAACTGCACAAACAGTACTGGTAATCCCTACTTAGCGCCTCCCACACAAACCCTAAATCCTCCGCCTCCCCTTGTTCCCGCTTTTTTCGTCATCGGTGACTCATCAGTCGATTGCGGCACCAATAACTTCCTCGGAACTTTCGCTCGCGCCGATCGACCTCCGTATGGTGTCGATTTTGATACTCATCGTCCTACTGGAAGATTCAGTAATGGTAGAATTCCGGTTGATTATCTCGCATTGCGTCTCGGTCTGCCATTCATCCCAAGCTATCTTGGCGAAACT…
45	Sa3F.277	ATGGGAAGTGGAAGTGGTGGATTAGTACTTGTCGTTCTCATACTCATCTGTGCCGGGTTGAGCAATGCTGTGTTTGGGAAATCCTATGAATTTCCAGCAATGTTTGTGATAGGAGATTCATTAGTTGACAATGGAAACAACAATTATCTGAACTCATTTGCGAAATCAAATTATTACCCGTATGGGATCGATTACCCTCAAGGCCCTTCCGGCAGATTCAACAATGGGAAAACCATAGTTGATTTCCTTGGGGAGTTGATAGGGATTTCATCAATTCCAGCTTTTGCAGATCCTCTTATCCGTCAGAAAGGTATTAAACGAGGAGTTAACTTCGCCTCCGCTGCTGGTGGAATCCTCGAAGAAAGCGGCAGTAACCTGGGAGAACACTTGAGTTTCTCA…
46	Sa3F.554	ATGTTGGCAATGAGATTATTGAAGTTTGTCTCCGTGAGCATCTTTCTATCAGTGATAATTTCAACAAGCAATGTTATTGAAGGTGGTGTTGGCCGGAGTAGGCAAAAGCCAGCAGTCACAGCTGTATTCGTGTTCGGAGACTCCACTGTTGATCCCGGAAACAATAACTTCATTGGAACACCTTTTACTAGTAACTTCCCACCTTATGGCCAAGACCTTCCTAATCATCAGCCTACCGGTCGATTCTCTAATGGCCGCCTTGTCTCTGACTTCATGTCTGAGTATGCAGGTCTCAAGGACTTGATCCCGCCCTACTTGGACCCAAACGTGAGCTTGGAGGAGATGATGACTGGTGTCAGCTTCGCCTCCGGTGGGAGCGGATTTGACCCTCTTACTCCA…
47	Sa42F.134	ATGGCAATGAGGATGAGAGTTTCAGTTATGGTGATACTAAGAATTTTTGGAGCTTTATTAGTTGAAGTTATGTCAGCAGCCGCGGCCGCAGAGGCTCCAAAACCTGTTACATTCGTGTTTGGTGATTCGCTTACTGAAGTTGGAAACAATAACTTTCTGCAATACTCATTGGCAAAATCCAACTTTCCGTGGTATGGGATTGATTACACCGGCGGAAAGGCCACCGGAAGATTTACTAATGGAAGAACAATTGGAGATATAATTTCTGAAAAGCTTGGAATAGCTCCGCCGCCGGCGTACCTTTCTTTATCGCTTTACGACGATGCTGTACTCAAAGGTGTTAATTATGCGTCCGGAGGTGCAGGGATACTCAATGACACTGGACTCTATTTTGTCCAA…
48	Sa45F.55	ATGGCTGTTGGAATGTCAAGTGTTCTTCTATTCATGTTTATGTTAATGCCATTGATTTCTACATGCTTGAATGTCACTCAGTTGAGACAAATTGTTGCCAAAAATCGAGTCAAATGTATTCTTGTTTTAGGAGACTCTACCGTTGACCCCGGAAATAATAACTGGCTTGATACAATGACCAAGAGTAATTTCCTTCCTTATGGCAAGAATTTCATGTCCGGTTTCCCTACCGGACGATTCTGCAATGGACGGCTCGCCACGGATTTCATCGCTGAAGCATTTGGATTCAAAAGCTCCATTCCACCATTCCTAGACCCTGCACTAAAGAAGGCTGATCTGTTAACCGGCGTAAGCTTTGCGTCCGCCGGTTCAGGCTACGATGACCTCACCGCCAATCTC…
49	Sa46F.118	ATGAATGTCTTCTTGTTCTTCTTATACATTCATGAAACATGTTTATCTTTGTTCCTAACTCTTATACTTGTCCGCAACGTTCGTGCACAAAATGTATCTACTTTAGTACCTGCAATCATAACATTCGGTGATTCGCTCGTTGACATCGGAAATAACAACTACCTTCCAACTTTGTTTAAAGCAAATTATCTACCTTATGGAAGAGATTTCATAAGTCACAGACCTTCTGGAAGGTTCTGTAATGGAAAATTAGCTATTGATTTTGCAGCTGACTTTTTGGGGTTCAAGATTTATGCACCGGCGTACAATACTCGAAGGGAGTTCAGAAGGAATATCCGTCTCGGTGCTAACTTTGCGTCAGCCGGATCTGGTTACGATGATACCACATCTCATATAGCT…
50	Sa46F.20	ATGTCTCCCATTACATTATTGATGATTGTCTTCATTTCCATTTCCATTTCCATGCTCATTTCACTGACTAAAGTCGAAGCTTTAACAAAGAGGAATCCATCAGTGCCAGCAGTTTTCGTGTTTGGTGACTCCACTGTCGATCCAGGTAATAATAACTTCATTGGTACAACTTTCAGGAGTGACTTCCCACCTTACGGTCAGGACTTGCCTGACCATATGCCCACTGGCCGATTCTCCGACGGCCGCCTCGTCACCGATTTCGTAGCTTCTTACGCTGGTGTCAAAGATTTCATACCACCTTATTTGAATCCTGAGCTCAGTTTGGATGAGCTGATGACAGGTGTCAGCTTTGCATCCGCCGGGAGCGGGTTCGACCCACTCACCCCACAAATCAGTAGT…
51	Sa46F.270	ATGACGTTGGGTTTGCTTATAGAGGTTATCGGAGCGGCGAGAAGTGGCGACAGGGGGTGTAACATTCCTGCAATTTATAATTTTGGTGACTCAAACTCCGACACAGGTGGCACATCAGCTGCATTTTTTCCAAGAGCATGGCCATCTGGTGAAACATACTTTAAAGAGCCAGCTGGGAGGACTTGCAATGGTCGACTCATCATCGACTTCATCGCTGAGAAGCTCAAAGTTCCGTACCTGGACGCGTATTTGGATTCAGTAGCGACAAGTTTCAGAAGAGGTGCGAATTTCGCTACTGGAGGATCAACCATCAGGCAGCAAAATGAGAGCTTCTTGTACAGCAGTCCTTTCTCTTTAGACGTGCAGTTTGCACAGTTCAGTAACTTCAAAGCTCGAACC…
52	Sa46F.31	ATGGTGTCTGGTCTTGTGTTTGTGCTTAGGGTGGTGCTCATCACTCTAGGTTTTGGGGTAGTGTTTGCTGACCCACAAGTCCCTGGCTACTTCATTTTTGGTGACTCTTTAGTAGACAATGGGAACAATAATAACATTGCATCTTTGGCTATGGCCAATTACTTACCCTATGGCATTGATTTTCCTCGTGGACCGACCGGAAGGTTCTGCAATGGAAAGACCACCGTTGACGTCTTAGCTGAGCTTCTAGGGTTCTCCGATTACATACCGCCTTTCGCTAGGGCTAGAGGCAGAACCGTGCTTCAAGGCGTGAACTATGCGTCGGCAGCTGCAGGCATTCGACAAGAAACAGGCCTTCAACTTGGTCAAAGGACACCGTTCAGTGGACAAGTGAGAAAC…
53	Sa47F.286	ATGGGTGCTTTGAGGATGATGATTTATGGGTTTTTTATTTTATGCGTGAATTTTGTTTCGGATTCGGTTGAGTTGGGTTGTGACTTTCCGGCCGTTTACAATTTTGGCGATTCGAATTCTGACACCGGAGCTGTATCAGCTGCCTTTTGGCCGATTCCGGCGCCTAATGGAATGAACTTTTTCAAGAAACCTTCTGGGAGGGACTCGGATGGGCGGCTTGTTATAGATTTCATTGCTGAGCGGTTGGAGTTGCCATATTTGAGTGCTTATTTGAACTCTATAGGTTCAGATTATAGACACGGGGCGAATTTCGCTACGGGTGGATCGACTATTCAGATGCCAAATGAGACTATATATGAGCATAGCATCAGTCCATTTTATCTTGGGATGCAGGTTTCC…
54	Sa55F.146	ATGGCTGCTCATCGGAGCTTCCTTGTTCAACTACTGCTACTCTTCTGCCGCATTTCAGGCAGCCTGAATGCGCAGCAGAAACAGAGCTACTCGAAAACATGCAGATTTCCGGCCATTTTTAACTTTGGTGATTCCAATTCTGACACTGGAGGAATCTCTGCTGTGTTTTATCCGATCGTTATGCCTTATGGACAGACATTCTTTGGGAAAGCTGTTGGTCGAGCTTCCGATGGTCGGCTCATGGTCGACTTCTTTGCTAATGGACTAGGCTTGCCATACCTGAGTGCGTACCTGAATTCGGTTGGAGCAGATTACCACCACGGAGCGGATTTCGCAACCGGAAGCTCCACCATCATGATGCCAACTCAGACATTTTTCCAAGGAGGACGAAGCCCATTC…
55	Sa56F.143	ATGGTGATCATCATCAACCAAATGTCTTGCATCAAATTAATGTTCATCTACATGTTCCTACTCATCTCAAGAACCAATGTTGAAGCTATGGACACGAATGGCAAGCCAGCAGTACCAGCCGTATTCGTGTTCGGTGACTCCACAGTCGATCCTGGTAACAATAACTTCATCGGTACCGCCTTTCGAAGCGACTTCCGGCCTTATGGACAGGACTTGCCTACCCACAAACCAACCGGACGATTCTCAAATGCTAGACTTGTCACAGACTTCATAGCTGCCTATGCCGGTGTCAAGGACTTCATTCCACCTTATTTGGATCCAAAACTAACCTTAGATGACCTGATGACCGGTGTCAGCTTCGCGTCAGCTGGAAGCGGATACGATCCATTAACTCCAAAA…
56	Sa57F.156	ATGCAGAGTAACCAGCAAACCTTTGTTTTGCAATCAGCCATGTCACCACCAAAAGTGCTGCTCATTCTGCTGGCATTTGTCATTGCAGCATTGCAAGGCTATGTGAGGGTGACAGAGGCTCGTGCTTTCTTTGTGTTTGGAGACTCACTTGTAGACAATGGCAATAATAACTATTTACCCACAAGTGCACGTGCCGATTCTCCACCTTATGGCATTGACTATCCCACACGTAGGGCAACTGGCCGTTTCTCCAATGGCCTCAACATACCTGATCTCATCAGTGAGGCACTCGGCTCTGAGACTACATTGCCGATTCTGAGCCCTGAGCTGATAGGAGAAAAACTGTTGGTAGGAGCCAATTTTGCGTCAGCCGGAGTCGGAATCCTAAATGACACAGGA…
57	Sa5F.25	ATGGCTAACCAGTACATTCCATGGCTTTTCATCCTCTTTTGGACAATGTTGCTAGTCACTGAGAGTGCAGCAGCTAAAGTGCCTGCTATTATAGTGTTTGGTGATTCAACAATGGATGCTGGTAACAATAACCAGATATCAACCATTGCTAGAAGCGACTTTCAGCCTTACGGACGAGACTATTCCGATGGGAAGCCTACTGGGAGATTTTCAAATGGTAGGATACCAAGTGACTTCATCTCTGAAGCATTTGGACTCAAACCTGCCATACCTGCATACTTGGATCCAGCTTACAAGATATCAGACTTTGCCGTTGGCGTCACCTTTGCATCCGCAGGTTCTGGTTACGATAACGCTACGTCCGATGTTCTGTCAGTGATACCGGTGTGGAGGCAAGTG…
58	Sa5F.658	ATGGAAATGTCCCTGGCCTTTTTAGCTCTCTTAATCTCCTTTTCCTTTCAACTCATTATCAATCCTGCTTCTATCGTGGAAGCCAGGGCGTTCTTTGTGTTTGGTGATTCCCTTGTGGACAGTGGTAACAATGACTTCTTGGCCACCACGGCTCGTGCTGATTCCCCGCCATATGGCATAGATTTCCCCTCACATCGTCCCACTGGTCGCTTTTCTAATGGTCTGGCAATTGGCTCAGAGCCAACATCACCATACCTCAGCCCAGCACTGAAAGGCGAAAGGCTGCTTATTGGAGCTAATTTTGCTTCTGCCGGAGTTGGAATTCTCAATGATACCGGTTTTCAATTTGTGAACATCATACACATCTACAAACAACTAAAGTTCTTCCATGAATATCAG…
59	Sa64F.90	ATGGAAGTATCAAACCCCGACGACGATTTTCGCACCTTCGTCGTCGTGCTCGTTCTATGTACTTGTGCTTTAGTGTCAGAAGCCAAGATAGTCCTACCGGGAAATGAAACTATTCCGGCCTTGTTGATCTTTGGTGACTCTATAGTTGACACCGGAAATAACAACGATCTAAAGTCCGTCATCAAGGCTAATTTCCCGCCTTACGGACGAGATTTTAATGGAGGAGTTCCGACCGGTCGGTTTTGCAATGGCAGAGTACCTTCAGACATGATTGCTTCAGAACTGGGAATCAAGGACACAGTACCAGCCTATCTTGACCCAAACTTGAAATCCAATGATCTTCTAACCGGCGTGTCGTTCGCATCCGGTGGCGCCGGATACGACCCACTGACAGCGACT…
60	Sa66F.83	ATGAGTATCAAGCTCTCCTCTTTAACATGCATACTCTACAACATCATCGTCCTTCTCCTGACATCTTCACTGATCAATGTGAGCAAACCATGTAACGGAGAGTCAGTTGCTTTCTTTATCTTCGGAGACTCTACAGTGGATTCCGGCAACAACAATTACATTAATACCACACCTGAGAACAGAGCTGATTACAAGCCTTATGGTCAAAATGGTCTCTCTGATGAACCAACCGGTCGGTTTACCAATGGCCGGATTTTTGTAGACTTCATCGCTGAGAATGCGAAGCTGCCGCTAATTCCTCCGTTTATGGACCCGTCCGCTGAGTACACCAACGGCGTTAACTTTGCGTCTGGTGGCGCTGGAGTTCTTCCTGAAACAAGTCAAGGCAAAGTAATTGAT…
61	Sa6F.163.1	ATGGAGTTTCAGTTGAAGTTGTTTGCAGTTATGGTCTTAAGTTCAGTACTTGTGTTGGCATTTTTGCTGACTGAAGCTGAGGGTGGTAGAGCGTTTTTTGTGTTTGGAGACTCGTTGGTAGATAGTGGAAACAATGACTTCTTGGCCACTACTGCTAGAGCTGATGCATACCCTTATGGAATTGATTCCCCGTCTCACACACCCTCCGGCCGCTTCTCCAATGGCTATAACCTCCCTGATCTCATCAGCCAGGAAATCGGCGGTGAAGAGTCTCCATTGCCATACCTGAGTCCACAACTCGACGGGGAGCGTCTACTTAATGGTGCAAATTTTGCTTCTGCAGGAATTGGTATACTGAATGACACTGGAGTTCAGTTTGTGAGTATTCTAAACTTCAAC…
62	Sa6F.233	ATGCCTTCATCTCGTAATCTCCATCACCACCTCGTACTCACCACCCTCTTCATCTCCATCTCCTCCTCCGCCGCAACCACTCCTTGCACGAAACCCCCAATCATCTTCAACTTCGGCGACTCCAATTCCGACACTGGCGGACTCGTTGCTGGACTCGGCTTCCCTGTTCTTCCTCCTAATGGCCGTACTTACTTTCAAAAATCCACTGGTCGCCTCTCCGACGGTCGCCTCGTCATCGATTTTTTATGCCAAAGTGTGAAAGCTCGCTTCCTGAGTCCCTACTTGGACTCTCTAGGATCGACGTTCACAAACGGTGCAAATTTCGCAATTGTTGGATCATCTACATTGCCCAAGTATGTTCCGTTTGCTTTAGCTGTTCAGGTCATGCAGTTTCTCCAT…
63	Sa72F.20	ATGGCTAGCAAATCGGTTTCCCTCGCACTATTTGCATTAGTGCTTCTCCATATTTCTTCCGTCAAAGCTGGCAGCCAGCTTCCTCTCTTTCCAGCCATCCTCATCTTTGGTGACTCCACTGTTGATGCCGGCAACAATAACTACATACCCACATTGTTCAAAGGGAATCACCCTCCATATGGCCGTGACTACCCTGGTGGGATTGCCACAGGCCGTTTCTCCAATGGTAAACTCACCACTGATGTCCTAGCCTCTTTGCTTAATATCAAAAGTGCTGTCCCTCCATTCCTAGACCCGCATTTGTCGGACGCTGATATCAAAACAGGCGTCAGTTTTGCCTCCGGTGGTGCGGGTTATGATGACACTACCAACTTTGCTTCTGCCATCCCTATCACCCAT…
64	Sa79F.141	ATGGAGTACTTTCACATTTCTCTCTCTTCTTCTTCTCCTCCTCCTCCTCCTCCTCCACGTAACACTATTTCTAAGGAAAGAACCTGCTGCCTACTAGTTTGTTTTAGTTTTCTCTTGTGGTGTAATGTTGGGGTGCAATCAGTAGTTGATATCCCGGAAAGTCAGAGATTTCCAGCCTTGTTAGTTTTCGGAGACTCCATCGTTGATCCTGGAAACAACAATAATATGGCTACTCCATCTAGGGCTGATTATCCTCCTTATGGCCAAGATTTCCAAGGTGGTAAAGTCACTGGAAGATTCTCTAATGGCAAACTCGCTACAGATTTTATAGCTCAAGAACTTTCCATTAAAGAGATTTTACCAGCATATCTAGACGATGAACTGAAGTCAACAGATCTT…
65	Sa79F.142	ATGGAGTCAAGGGCTTCTACTTTTAAACGTACTCTTATAACCTCCATAAGTAGCAAAATATGGCTTGTAATTTTTTGCAGTGGATTGCTCTTGTACTGCTGCCCTCATGTGCAAGCAGAATTTAAGTTACTAAAAGGTATCAAATTTTCTACATTGTTAGTATTTGGAGATTCGATTGTCGATCCAGGCAACAACAATGATGTCCAAACACCATCTAGGGCAAACTATCCTCCTTATGGAACAGATTTCATCGGAGGAGTACCAACTGGCAGGTTTTGTGACGGAATGGTTCCTTCCGATTTCATAGCTCAAGCACTTTCAATCAAACAGTTGCTGCCAGCATATTTGGACCCAAATTTGCAGCCATCTGATCTACCTACAGGCGTAAGTTTTGCCTCT…
66	Sa79F.143	ATGGTGTTTAGGTCTTCAAAATCCTCATCTCACTTCACATTGAAACCTAGACATAACACATTATCATTCTTGCCATCTCTGATTTTCTCTCTTCTCATTTGGAGCGGTGTGTTCTTTGCATCATCAGCGTTAGATATACCTGAAGATAGAAAGTTTCCGGCGTTAATTGCATTTGGTGATTCAATAGTGGATCCTGGAAACAACAATGGCTTAAGAACCCTAATCAAGGCGAACTTCCCTCCGTACGGGCAGGATTTCAAAGAAGGACCTACTGGAAGGTTTTGTAATGGGAAGGTGCCTTCTGACTTAATAGCTGAACGGTTACAAATCAAAGAACTTATCCCAGCATACTTGGACCCAAATTTGCCACCAGATGAACTCATCACAGGTGTCAGTTTC…
67	Sa7F.179	ATGTCTAACTTTCTTAGTTTTCTAACCATTCTGATCAGTATGATCAATCTTGTTCCCAAGATTGCTCTCAGCCAGCCACAAGTCCCATGCTACTTCATTTTCGGAGACTCTTTAGCCGATCCGGGCAATAATAATCTCCTCATAACTCAAGCTAAGGCTAACTATCCGCCTTATGGGATTGATTTTCCCAATGCTAAGGCTACAGGGAGGTTTTGCAATGGCCGGACCGTCGTTGACTTTATCACACAACAGTTGGGTTTCGTTGACTTGATTCCTGATTTCATCTCTGCTACTGGTTCCAAAATGCTTCGAGGAGTCAACTATGCCTCCGGTGCAGCTGGTATCTCTAACGAGAGCGGTCGAAATCAGGGAGACAGGCTGACACTGACGGAGCAAGTG…
68	Sa7F.184	ATGGTGACAATGGGACAATTCAAGATTGTATTGATGATGATCATTCTACTGATTTCAATGACTAGTGTCGACGTTACTAAAGGTGTTGGAAGTAGGAGAATTAAGCCAGCAGTTCCGGCTATATTCGTGTTTGGAGACTCAACTGTCGATCCTGGCAACAACAACTTCATTGGGACTCCTTTTACTAGTGACTTCCCGCCTTATGGCCAAGACTTTCCCAATCACCAGCCAACCGGACGGTTCACCAACGGCCGGCTTGTCCCGGATTTCATAGCTGAGTATCTAGGAGTCAAGGACCTTGTCCCGCCCTACCTCGACTCAAGCCTGAGCTTGAACGACCTTATGACCGGAGTTAGCTTCGCTTCCGGCGGGAGTGGATTTGACCCTCTAACTCCAAAA…
69	Sa7F.458	ATGCCTCCACCCATCTCCTCCACCGCCGCCATCCTCTACCTCATCATCCTTTCCTCCCCAGGAGGAAATGGTAGATCAGTTGCAGAGGCCCGGCGGCGGCACATGCAGCCTCGCATTCTCGGACGCGATCTCTACGGTTTCAGACCAACAAAAATGTTCGTGTTCGGAGATTCATATGCTGACACGGGAAACAACAGGAAGACACTGGCCAACTCCTGGAAGGCTCCTTACGGTGTCACTTTCCCTGGTAATCCAGCCGGCCGTTACTCCGATGGCCGCGTCCTCACTGACTACATTGCTCGATTTGTTGGAATCAAATCACCAATCCCATACAGATGGATGAACGTAGGACCTAAAAGGATCCAATATGGTGTTAACTTCGCATATGGCGGCACTGGA…
70	Sa7F.504	ATGAATGCTAGAGTTGTACTGCTCCTACTGTTACATTCACTAACCCTGATCGGCCGGAGTTCCTGCCGCTCCGGCCGAATCAAATATTGTAACTTCCAAGCTATATTCAATTTCGGTGACTCAAATTCAGATACAGGAGGAAGATCAGCTGCATTAATGGAAATATCTTCACCTAATGGTGAAACTTACTTTCATTATCCTTCCGGTAGAGGCTGCGACGGACGTTTAATCATTGATTTTATAGCTGAGGAGCTGAAACTACCTCATTTAGATGCTTACTTGGATTCATTAGGGACTAGTTTTAGACACGGTGCGAATTTCGCTACCGGAGGCTCATCGGTCCGGCCCGGAGGTTACAGTCCCTTCCATTTAGGGATTCAAATAAATCAGTTTCTTAGA…
71	Sa81F.175	ATGTTTGGATTCGTCTATGGTGTTTTTCTATGCCTTATGTTGTTAAGTGCCACTGCCTGTTCTCAAAGGCCGCGGACAACTCAAGCACAAGTTCCTGCCTTCTTCATTTTTGGTGACTCACTTGTTGACAATGGTAATAATAACAATATGCTTACTCTTGCTAGAGCTAATTATAGACCTTATGGCCTTGATTTTCCTCGTGGAACTACCGGCCGTTTCACCAATGGATTGACCTACGTCGACGCGTTAGGCCAACTGTTGGGATTTCGGGAATTTATACCGCCTTACGCCAGAGCGAGGGGCCGCGGACTGATCAGAGGCGCGAACTACGCGTCGGGGGCTTCAGGCATCCGTGACGAAACCGGGAACAACTTGGGACAACATAACTCAATGAATCAA…
72	Sa82F.57	ATGGCCGCCATGCATGTTCTTGCAGTTGTTGTCTTCTGCTTAACCAGTGCTGTTACACTTGCTGTCCCTCAAGTCCCATGCTACTTTGTTTTCGGGGACTCCCTAGCCGACCCTGGCAACAACAACAACCTTAAAACCATCGCTAAAGCAAACTACGCACCTTACGGTGTCGACTTTCCTGGTGGACCTAATCCTACAGGGAGGTTTACCAATGGCAGAACTTATGCAGACTTCATCACTCAGTCACTGGGTTTCACTTCCTTCGTCCCGCCGATTACTTATGCTGCTGTTGGAAACTTCATTGGTGTTAACTACGCCTCTGGTGCTGCTGGAATCCTTGACGAAACCGGCAAAACTAACGGTGACAGGATATCGCTTGGAAAGCAACTTGTGGCACAC…
73	Sa84F.200	ATGGCGAGCAGAGGACTAATGGCTTGGCTGCTTCTGGTGGTGCCGGCAGTATTATTGTCTGATTTAAGCGAGTGCAAATGTGATTTCGAGGCTATATTCAACTTCGGAGACTCCAATACTGACACTGGTGGCTTCTGGGCTGCCTTCCCAGCTCAAGGTGGCCCTTACGGTATGACTTACTTTCAAAAACCGGCCGGCAGAGCTACCGATGGAAGGGTCATAACCGACTTCTTAGCTCAAGCCATTGGGATTCCATATGTGAGCCCGTATCTGCAATCTATTGGCTCGGACTTTCGCCATGGAGCCAACTTTGCCACACTGGCGTCGACGGTGCTCGAGCCCCAAACATCATTGTTTGTAACTGGCATCAGTCCGTTCTCTCTTGGAGTCCAGCTCAGG…
74	Sa86F.120	ATGACGTTGGGTTTGCTTATAGAGGTTATCGGAGCGGCGAGGAGTGGCGACAGGGGGTGTAACATTCCTGCAATTTATAATTTTGGTGACTCAAACTCCGACACTGGTGGCACATCAGCTGCATTTTTTCCAAGAGCATGGCCATCTGGTGAAACATACTTTCAAGAGCCAGCTGGGAGGACTTGCAATGGTCGACTCATCATCGACTTCATCGCTGAGAAGCTTAAAGTTCCATACTTGGACGCGTATTTGGATTCAGTAGCGACAAGTTTCAGAAGAGGTGCGAATTTCGCTACTGGAGGATCAACCATCAGGCAGCAAAATGAGAGCTTCTTGTACAGCAGTCCTTTCTCTTTAGACGTGCAGTTTGCACAGTTCAGTAACTTCAAAGCTCGAACC…
75	Sa92F.24	ATGTTACATGTTCTTAGCCAACTACGCGCAAAAATGGCATCTGACATTCTTTATCGTCTTCATACTCCGGTTGCTATTTTTATGTTACTCATATTTACAAACGCAGCCATTCGTAACACACACAATAATCGCTCGAAACTACGAGCAGCTTTCGTGTTCGGAGACTCGACGGTGGACTCAGGGAACAACAATTTCCTACTGACGGATTTTAGAAGTAATTTTCCACCTTATGGACATGATTTTGCTGGAAGTGAACCTACTGGAAGGTTTACAGATGGCCGACTTGTCACTGATTTTATAGCATCATACGTCGGCATCAAAGATTACATACCTCCTTATTTAGATCCGACGCTCGACGTTGAAGATCTCAAAACCGGAGTTTGTTTCGCTTCAGCTGCT…
76	Sa95F.131	ATGCAACATTTTTCATCGAAAGTTTCATGTCTGGTTCTGACATTTAGCATAACACTTGTTGTTGTAATGCTGGATCAAAACAATGTTCATCATGTGGAAGCAAGAGCTTACTTTGTGTTTGGTGATTCATTGGTTGATAATGGCAATAACAACTTCTTGTTAACATCCGCACGCGCTGATTCTCCTCCTTACGGAATTGATTCTCCTTCTGGTCGTCCTTCTGGTCGTTTCTCCAACAGCCGTAACCTCGCTGACCTCGTAGGGGAGAGGATTGGAGTAGCAGAAGTGCTTCCATACTTGAATCCTCAACTCGACGGCGAGAGATTACTCGAAGGGGCTAATTTTGCTTCGGCCGGTGTCGGTATCCTGAACGACACCGGCATTCAGTTTGTAAATATT…
77	Sa99F.11	ATGGCAAAGTCTGTTTTTATCCATGTTTTCATGTGCATGTTCTTGTCCTTGATTGTTTTTGTGTCTCATGTTGCACTTGCGCCTGTCCCTCGAGTCCCTTGTTACTTCGCTTTCGGAGACTCCTTAGCCGACCCTGGCAACAATAACAACCTTCAAACCACCGCCAAGGTCAACTATCCACCGTATGGTATTGACTTCCCTGGTGGTGCTACCGGTCAGTCATTAGGGTTCACTGCCTTCCTTCCACAGATCGCCGGAGCTGGCGGTGGAAATTTCATCGGTGTTAATTACGCCTCCGGTGCAGCTGGAATCCTCGACGGCACAGGCAAAGCTAGTGGTGACAGAATATCACTAAGAAAGCAACTCATAGCACATCAAATGTTAATCGATCAGCTACCA…
78	Sa9F.272	ATGTCAACTCACAATCAAACTTCCCTCCAACTACTTACCCTTCTCATCCTCCTCTCATTCTTTCTCCAACCCACATCAGCCCATAAAAAGAACAAAACTTCCGGTGGCGGCGGCGCGGGAGGTGCTGGTGGAAGTGGCGAGGTTCAAGTAGGAATGTCGTTACAAGGGAGTTTTTCACAGGTTATTGCATTTGGTGACTCGTATACTGATACTGGAAACTGCATGTTCATGAATGGGTTGAGAAGATTCTTTGGTGGAATTATTGCGAATTCTCCGTATGGTTCGATTTTCAAGAGTCCTAAGAATGGGAACAGATTTTGTGATGGGAGGTTAGTGATTGATTTTTTGTGTGAAGAGTTGGGATTGCCTCATTTGCCACCTTATAAGGATCCTAAAGTG…
79	Sa9F.31	ATGGCACTGATTTCCTCCACATACCAATTCATGGCTACTTTCACCATTATTACTGTTCATCTTTTGGTCTATATGCAGTTGGGGTATAGTCAAGGCGTAGCAGCCTTCACTTCATTTATCTTCGGAGATTCACTAGTGGACGTTGGAAACAATGACTATCTTTTTACATTGTCCAAAGCTGATTCACCTCCTTATGGCATCGACTTTGCACCTTCTGGACGTAATCCCACTGGCAGGTTCACCAATGGCCGCACTGTAAATGACATTATAGACGAAACCCTAGGAGCAAGCTCATTTTCTAAGCCGTATCTGGACCCTGATTCCAATCAGGACGACGCGATTATTAGAGGACTAAACTATGCTTCTGGATCTTCTGGAATATTGGACGAAACAGGAACT…
80	Sa9F.81	ATGTCTTCTTTCAGCCATCCATCCCTCCAACTTCTCGCCATTCTCATCCTCTTCTTGTACCTCCTGCAACCAGCATTAGCCCATGACAAACCCAAACAAACGAGTACGTCGACAGGCGGTGGAGGCTCAGTGTCAGGAAGTGGTGACATTTCGGTGAAGGTGTCGTTACAAGGGAGCTTTTCTCAAGTCTTTGCATTTGGTGACTCGTATACTGATACTGGAAACTGTATCTTTTTAAGTGGAGTAAAGAAGCTTCTTGGAGGGAAGCTTCCACTGTCTCCATATGGACCACTTTTCAAAAGTCCATTGTCGGGGAATCGGTTTTGCAATGGGAGATTAGTGGTTGATTTCTTGTGTGATGCTCTTGGGTTGCCTCCATTGCCACCATTTAAGGATCCT…
Pseudoenzymes conding sequences
1	Sa0F.1249	ATGATTCTCTCTGCGCTTTTAACTTCGGTTGGAATAAATCTTGGCCTTTGCTTTCTGTTTTTCACTCTATACTCGATTTTAAGAAAGCAACCGAATAATGTTAAAGTGTATGCACCGCGTTTGGTTGCTGAGGGCAAGGCTCAGGAGAGAGGTCATTTTAATTTGGAGAGGTTAGTGCCGTCTGCTGGTTGGGTAACGACAGCATGGCGGACAACTGAGGAAGAAATGCTAGTTGAAATTAGGCCTCGATGCTGTTGTGTTAATGAGAATTTTTATCTTCAGGAATATGGTTATATCTCACGTAAAAGAATTGATTACTTCTACTCAAACAAACCTCAGCCACACCACTTTACTATCCTAGTTAGGGGAATTCCTAAATCATCTACTGGTAGCTACAGT…
2	Sa15F.348	ATGAACATAGCAGCTTTATTAACTTCCGCAGGAATCAACATAGGAATGTGTGCATTGCTGATTTCAATGTACTCGATTCTCCGTAAACAGCCAACCAATTTCGATGTCTATTTCACTAGACGTCTTGCACAAGTACAAGGAGAGCGACAAGACTCACTTTGCTTTGAGCGGTTCGTTCCTTCCGCTAGTTGGTTAGTTAAGGCCTGGGAGACCACCGAGGACGAATTGCTAGCTGATGCCGGACTTGACGCTTTGGTTTTTATCCGCATCATCGTCTTCAGTATACGAATATTCGCCATTGCGGCGGTGGTGGGAATTTTCATGGTGTTGCCGTTGAATTACTACGGCCAAGAGATGCAGCATAAGGAAATCCCCTTCGAATCGCTAGGAGTTTTCACC…
3	Sa19F.282	ATGGCCAGTACACTGATCCAGTTTCCCTCTCTCCACTTCACTCCCACCACCGCCACCACCGCTGGTTTGGCTACCGTAATCGGTGCTCTGTTTTTCATCGTTTTCAGAAATTTGCTACATAAGCGAAACCTAAAGTCTCCACCAGCTGTGCCTGGACTGCCTTTGATTGGAAATCTACTGCAATTGAAAGAGAAGAAACCCTACAAGACATTTTCAAAATTGGCGGAAATTTACGGCCCGATTTACCGAATCCGACTCGGATCATCGTCCGTGGTGGTGCTCAACTCGGTTGATGTCGCCAAGGAGGCAATGGTGACTAGATTTGCATCGATTTCAACAAGGAAGTTATCACACGCATTGAAGCTACTCACTTACAACAAGAACATGGTTGCGATAAGT…
4	Sa28F.160	ATGACACAGGTGGTTGAAGGATATCTACCAAGTGTTGTATTAATGTTATTTTTATATGCTGCGCCACCTTTAATGATGCTCTTCTCAGCTGTGGAGGGCTCTATTTCTCGCATTGGAAGGAAAAAGAGCGCTTCCTGTAAAGTTTTATTCTTCACAATTTGGAATGTCTTCTTTGTGAACATTTTTAGTGGAACCATTATGAAGCAATTGGATAAGCTTTCTTATTTGAAAAACGTCCCTATACTCCTTGGTCAAGCTGTCCCCTCGCAGGCTATCTTATTCATGACATATATTATGACATCCGGGTGGGCAAGTCTATCGGTTGAACTTCTGCAACCTTTTATGCTTCTGGCCAACTTGTTCTCTAGGTACATACTGAAAAAAGAGACGCCTCCGCAA…
5	Sa28F.161	ATGAACATAGCGGCGCTCTCAACATCCGCTGGGATTAATATCGCACTATGTGTTGTATTTTTTTCACTTTATTCTATTTTGAGAAAGCAGCCTGGCAACGCTAGCGTCTTCTTCGCTAGATGGATTGGTCAACGTTTAAGACCTTGTGAAAATACTGTTGAAAGATTTGTTCCTTCAGCTAGTTGGATTTTGAAAGCATGGCAAACTACTGAGCAACAATTGTTAGATTCCGCTGGAGTTGATGCTGTTGTCTTCATTAAAATCGTCGTTTTCAGTTTTCAGATATTCACTGTTGCTGCGGTATCTTGTTTTATTATGGTACTACCCAGCAACTATTATGGGAGGCTGATGCAACATGCTGAAGTTCATTCTGAAGAGCTTGAAGTGTTTACAATTGTT…
6	Sa28F.215	ATGCTGGTGTCTGCACTTTTCACTTCCCTGGCGATAAACTCATGCTTGTGTATAGTATTTTTTACGCTGTATTCTGTATTGAGGAAGCAGCCTAGTCATTATGCTGTTTATATTCCGCGCTTGGTGTCTGAAGGAAAACATAAGTTTGTCAGGCATTTTCGGTTGACTAAATATCTGCCGTCTCCTAGTTGGGTAAAGAAGGCTTGGGAGTTATCGGAAGATGAGTTATTGTTGTTATCAGGGTTGGATGCAGTGGTCTTCATGCGAATGTTGATCTTCAGCTTTAAAGTATTTTCAGTCACCGGAGCTATTGGAATATTTCTTCTTATGCCGGTTAACTGCTTTGGAACTCAGCTTGAGCATTTTGATTTATACAACTTGTCGAATAACTCTTTGGAC…
7	Sa28F.72	ATGAACATAGTGGGACTTTTGACTTCTGCCGGGATTAATATAGGAGTATGTGTTATATGCTTTTCGCTATATTCTATACTGAGGAAACAACCTGGGATAGTTGGTGTGTACTTTGCTGGAAGGGTGACTCAAGCTCAAAAACAGTTAAGAGATAGTGAAGATAGTATTGAGAGATTCGTTCCGTCTGCTAGCTGGATATGGAAGGCTTGGGAAACTAGTGAAGACGAGTTACTTGCGTATGCTGGACTGGATGCGGTCGTCTTCATAAAAATTGTTGTTTTCAGTATTCAAGTTTTCTCAATTGCGGCATTTGTGTGCCTCCTTATGGTGCTTCCAAGCAATTATATTACGAGGAAACATGTTGCCCTTTCATCTGAAGAGCTGGAAAATTTTACAATT…
8	Sa33F.10	ATGCTGGTATCTGCCCTTTTCACGTCTGTTGCGATTAACACATGCCTGTGCATATTATTTTTCGTGCTTTATTCAGTTCTTAGAAAGCAGCCAAGTAACTTCGGCCTATATACCCCGCGTTTTGTGTCTGAAAGAACACATAAACTTGGCAGGCATTTTCGAATAACTAGGTACTTGCCTTCGTCTAGTTGGGTCAGGAAGGCATGGGAGTTATCAGAAGATGAGTTGTTGTTGTCCTGCGGTTTGGATGCTGTGGTTTTCATCCGTATGCTGATCTTTAGCCTCAGAGTATTTTCAGTTACTGGTGCCATTGGAATTTTCTTTCTTCTGCCTGTCAACTGCTTAGGGACTCAGCTCGAGCATTTTGACATCACCAACTTGTCAAATATTTCATTGGAT…
9	Sa33F.138	ATGAACTTAGTGGGACTTATGACGTCAGCGGGGATTAATATTGGCGTATGTGTTATATGCTTCTCGCTATATTCTATACTGAGAAAGCAGCCTGGAATTGTTGGCGTTTACTTTGCTGGAAGGGTGACTCAAGCTCAAAAACAGTTGAGAGATAGTGAACATAGTATTGAGAGATTTGTTCCGTCTGCTAGCTGGATTTGGAAGGCTTGGGAAACTAGTGACGAAGAGTTATTAGCGTATGCTGGACTTGATGCGGTGGTTTTCATTAAAATGGTCGTTTTCAGTATTCAAATATTCTCAATTGCGGCTTTTGTGTGCCTCCTTATGGTGCTTCCAAGCAATTATGTTAGGAAGGAACATGGTGCCATCTCCTCTGAAGAGCTGGAAAGTTTTACAATT…
10	Sa55F.257	ATGGAATCTGTTTCTTTAGTGGTGGATAAGGTGAAAGGAGCTTTGAATTCGACTCGTGACTTAATTGCTGATGCTTACCAGCGCCAAAGCAAAGAGATGTCTCGCCGGAATCCGATTGAGATACTAAAGAGACTGCAACGAGAAGCATTTTCAGATCTCATGAAGCTCAGAGATAGACAAGATAAAGTTGAACGATTTATTTCTTACTACAATAAATCTTCAAAAGGGAGTCCATTTCAAGAAGCCAGTACCCGTGTGCAAGGAGAAGTTGATGTGTTTGGAGCTGTATTGGTTGCAAATTGCTTTGATCAGCAGGCTGGGGATGTACTCGATGAGGCAGGTTTTAGGAACGGGATTAACTCAAGGTTCACATTTGAAACTGTTATTCGAAAGAATGAT…
11	Sa55F.279.2	ATGTCACTTATGTTTCTTATGAGCAAATATCTTTCAGAACCAGGTTCCACAAGAGCTACAAAGAGAATGGTCTTTGCGAGTTTCATCCAGGAGGTAAAAACATTACTGCCTGCATCCACTATTACGTTAGCCCTGGGCGGTGTTTTGTTGGTACTCTTCTTCGCACTGACAACTGGGAAGCGTGGAAAAAAGGAAAAATCCTTGAAACTTCCACCTCCACCAGGGATACCAGGACTGCCGATATTAGGGAACTTGCTGCAATTAAAAGAGAAAAAACCACACAAAACGTTTACTAAATGGTCTGAGATCTATGGACCTGTTTATACTGTCAAGCTTGGTGCTGTTTCTATGGTTGTCCTGAACAACACGGATGTTGCAAAAGAGGCCATGATCACTAGG…
12	Sa57F.61	ATGCTTGTATACGCTTTACTGACATCCCTTGGGATAAACTCCGGCCTATGTTTACTGTTCTTCACGCTATATTCAGTTTTAAGGAAACAGCCTATTAACTACAATGTATACATTCCGCGCTTGGTGGCTGATGGGAAATATAAACTCGCTAGTCATTTTCGTTTAGACAGACTATTGCCTTCTCCCGGTTGGGTAAGACAGGCTTGGATCATATCAGAAGATGAGCTTCTAGCGTCATCAGGCTTGGATGCAGTGGTTTTTCAGCGTCTAATAACCTTCAGTTTGAGGGTATTTTCATTAGCAGGAGTTATTGGTATTTTTGTACTTCTTCCGCTGAACTGTTTGGGAGATGAGCTTGAAGATATTGACTTTGCGGATTTTTCGAATAATTCATTAGAT…
13	Sa65F.11	ATGTTGGGAGCCCTACAATTTGGAGTTGTAGGGTTGGCTTGTATTGTCCTTTTTGTTCCTATGGGAATGGCCGGATGGCATCTCAGTCGTAACAAGATCCTCTTTTTCAGTGGCTCGTTGTTCATCTCGTTAGCTATAGTCATCCATCTCTCTCCTTACTTCCCTCCCATCCCTGATTTTGCGTCATCGTCTTCGTCGTCGTCTTTGCATAAGTCTGCGTTCAATCGTGAGTCTTGTATTTCTTATGTTCATGATGTGGTTTTTGATGTTGTTGCTTCTGAGGTTAATCACTCTGAATATAGTGTGAGTTGGGATTGGAATAGAAAATCTAGTAATGTTTTGGAATGTGAGTTTCAGAAGCTGAGTTCTGTTGATGTGTCTGATTTGTTGAATGGTTCT…
14	Sa69F.45.3	ATGTCACTTATGTTTATTATGAGCAAATATCTTTCAGAACCAGGTTCCACAGGAGCTACAAAGAGAATGGTCTTTGCGAGTTTCATCCAGGAGGTAAAAACATTACTGCCTGCATCCACTATTACGTTAGCCCTGGGCGGTGTTTTGTTGGTACTCTTCTTCGCACTGACAACTGGGAAGCGTGGAAAAAAGGAAAAATCCTTGAAACTTCCACCTCCACCAGGGATACCAGGACTGCCGATATTAGGGAACTTGCTGCAATTAAAAGAAAAAAAACCACACAAAACGTTTACTAAATGGTCTGAGATCTATGGACCTGTTTATACTGTCAAGCTTGGTGCTGTTTCTATGGTTGTCCTGAACAACACGGATGTTGCAAAAGAGGCCATGATCACTAGG…
15	Sa76F.91	ATGAACGTAGCGGGACTGTTAACTTCGGCAGGGATTAATATAGGCTTGTGTGTGCTGTTTTTCTCTCTTTATTCTATATTAAGAAAGCAGCCTGGGCTTGTGGGTGTGTTCTTTGCTAGAAGGGTAGCACAACAACATTTGAGGCAATGTGAACATAGGATTGAGAGATTCGTACCTTCTGCTAGCTGGATAATGAAGGCATGGGAAACGACCGAGGAAGATTTATTAGCTTCTGCTGGACTGGATGCGGTGGTTTTTATTAAAATAGTTGTTTTCAGTATTCAGATATTCTCAATTGCTGCTGTCGCTTGCCTCATTTTGGTTCTACCATCCAATTACTATGGGAAGCAGATGGAGCATGCTCACATCCCCTCTGAAGAGTTGGAAGTATTTACGATT…
16	Sa104F.62	ATGAACGTAGCGGGATTGTTAACATCAGCAGGGATTAATATAGGATTGTGTGTTCTGTTTTTGTCTCTTTATTCTATATTGAGAAAGCAGCCTGGGATCGTGGGTGTGTTCTTTGCTAGAAGGGTTGCACAACAACATTTGAGGCAGCTTGAACATAGAATCGAGAGATTCGTACCTTCTGCGAGCTGGATATTGAAGGCATGGGAAACAACTGAAGAGGAATTGTTAGCTTCTGCAGGACTGGATGCTGTGGTTTTTATTAAAATAGTTGTTTTCAGTATTCAGATATTTTCAATTGCTGCTGTTGCTTGTCTCATTCTGGTGCTACCATCCAATTACTATGGGAAGCAGATGGAGCATGCTCACATCCCCTATGAAGAGTTGGAAGTATTTACGATT…
17	Sa144F.11	ATGTGGTACTATGATGTCTGGCTGTTGCGGATTTTCTCAGCTCTCTCATTTTATTGTTTGATTTTACCGTTGTTTTCCTCGTACTCTAACTGTGCACCTGTTTTAATCAACTTCGGCGATTCAAATTCCGACACTGGAGGACTTCTGGCCGGAGTTGGACTTCCTATAGGCCTTCCGCATGGAATCACATTTTTCCACAGAGGCACTGGCCGGCTCGGCGATGGACGTCTCATCATTGATTTCCTCTGTGAGAATTTGAAAGTGAATTATCTCAGTCCTTACCTGAACTCACTTGATCCAAATTTCACAAGTGGTGTAAACTTCGCTATCAGCGGCGCCGCCACGCTTCCTGAGTTTGTTCCCTTCTCGTTAGATGTTCAAGTTCGTCAGTTTATCCAC…
18	Sa214F.33	ATGACTTCCTCAACAATTACATCCTCCCCTGTAGTTTCCACCGGAGCAAGGATCTCCCAAACCCCAGACGCATTCGTCGATGACATGATCGGTCATTTCAGAGCCCAACTCACAGTAATTCGAGCAAAGCGTGCTGCGGAAATGGAGGGCAGTCAGTACCAAGGGATTATCCCATGCGGACCCACTTCAACAATGTGTGAGGATCGTGATAAATATGTGTTTTGGGATCCGTACCATCCTAGCCAAGCTGCAAACATTATCATAGCTAAACAACTGCTCGATGGTGACTCCAGAGTCATTACCCCGATGAATCTTCGCCAGCTTCTTGACCTTTGA
19	Sa24F.28	ATGGAGAAGACGATGACGACGACGGAGATGTCCGAGACGAACTTAGTGAAAGACGCTCATCATCCGTACGCGTACCATGTCTCCGGTCCTCGGAATGTCTGCTCGCCTAATTGGCGAGATCTCATCCGCTCCAGCTGGATGGACGGGAACTACAAGAGGACTGTGATGGCATGCTTTATACAGGCAGTGTATCTACTGGAGCTAGACAGACAAGAGAATAAAGCTGAAGAGAACGCATTAGCGCCGAAATGGTGGCTGCCTTTTAAGTACAAGTTGAGTAAAACATTGATTGACGAGAGGGACGGTTCCATATTTGGTGCAATTCTAGAATGGGATCATTCTGCTGCTTTTGCGGATTTGATACCTTTTAGACCTAGAGGTGCGCCCAAGGCTGTTTTG…
20	Sa36F.52	ATGGCCTCTGATCACATCATTCATTCTCTCCACCACATTCTGCTCTCTGCTTCCATTTTACTGATTTTCACATCATCATCTGTGATCAGCATACGCACTGCCCATTCCCACAAAGCTAAGTCCGCAAATGAACACGGAGGAATTAATCTTAATCGTTCTAAAATACTTGCTGTTTTCGTGTTTGGAGACTCCACTGTCGATCCCGGAAACAATAATTACCTTCTAACTGATTTCAGAAGCGATTTTCCGCCTTACGGCCGTGATTTTATAGACAGTCGACCCACCGGAAGATTCACAAATGGACGCCTTGTTAGTTACTGA
21	Sa00F.1229	ATGATTTCTCTTCTTCCGGAATCAAACACTGGATCCATATTTTGTGCTATTTTTCGTTACAAGGATTCAATGGAACTTTCCGCACCGAGGTACGTTATCTCTTTTCGTGGAACAATACCTACATTTACCAAGGACTTGAAAGTGAACTGGTATCTCATAAAAGAAAAACTCAAGAAAACTCGTCGCTTTAAGGAAACTGTTTTATTCGTTGAACAACACATCTTAAATACTGAAAACATTTGGCTCACCGGCCACTCAATGGGAGCTTCGATGGCGCTCCAATTAGGCAAAAGATGGGCGATAAATGGAGTATTTATCCGGACGTATCTTTTTAATCCTCCTTTTATCTCGGCCTCTTTCTCTAGTTGGATCAAGAATGAGGATGTTAGGAACATTGTA…
22	Sa0F.10-9	ATGAGGCCGAGGATTTATCTGTTTGGGGATTCGATTACGGAAGAGTCGTTTAGCGGTGGAGGTTGGGGAGCTGCTCTGGCTGGTCACTTCGCTCGAACTGCAGATGTGGTGCTGAGAGGTTACAGTGGGTACAACACGAGATGGGCTTTGAATGTGATTGATAAAGTGTTTCCAGATGACAAGGTTTCGCCAATTGCGGTGACAGTGTTCTTTGGAGCAAATGATGCTTGTCTTCCTGATAGATGCTCTGGATTCCAACATGTGCCGATTGCTGAGTTTAAAGAGAATCTCCAGGCCATTGTGTCGTTCTTCAAGAAGCGTTGGCCTGCAACAGAAGTGATCCTTATCAGTCCTCCACCAATTGATGATGAAGTTCGCACTTTGTATCCATATATTGAA…
23	Sa0F.1144	ATGGATCAGATGAGTACTGAATCGGCCGATTGTGGAACATGCACTATGCCGATCATAATTAAAGAGATTTGGGGTTGGTGGGTTTGCGGCCGATTCGGAATCGGCGAGCTCGAGAGAGGGTTTTGTTGTGTTGCTCTCTCGTGCGTGTTGTCTTCGATATTGATGGAAGAAGGTGCTAGGAACTTCTGGATGCCAAATTCAAATCCATTTGGGTGTTTACCCTTAGCTTTAACTTCAAGTAACGCCACGGACGATGATATCGACAACATTGGATGTCTCAAATCCCTAAACAACATTACAAGCCATTTCAACGAAGAATTACGAATCCTATGTGAAAATCTACAATCCAATTTCAGCAGCTCTACACTATTCTACCTAGACATATACACCATCAGATAT…
24	Sa20F.274	ATGTCTTCTAGTGCATCGGAGTTTTTAAGGTTGTTTTTGATGTTGTCATGTTTGAGTACTTTTGTTACGAAAATGGTACATTGTGATTCACAAGTACCGTGTTACTTCATTTTTGGTGATTCATTAGCTGATGCTGGTAATAACAATGATCTTAAAACAATTGCTAAGGCGAACTATCCGCCTTACGGCGTCGACTTTCCCGAAGGACCTACCGGAAGATTCACCAATGGGTTAAACTACGCTGATATAATCGCTAAACTTTTGGGTTTCGATGACTTTATCCCGCCGTATGCGTCCGCTAAAGGCGGAGAGGTTCTCAAGGGTGTAAATTATGCTTCTGGCGCTGCCGGAATTCTTGATGAAACTGGTCAAAATCAGGGCGACAGGTTTTCTATGAAC…
25	Sa20F.275	ATGCCTGAATCTTACAATTCCAGCAATCAGTACACACCAAATTCCTTCGCAAGATTGCTCGCTGAAGCGTACGCTACTCAGCTAAAGAAATTGTACGAATTTGGAGCAAGGAAGGTGGCAATTGTCGGAATAGCGCAACTAGGCTTGACACCGGTCGAGTTAGCAAGACAAGGACTCGCTGGAGTAGTCATAGTGAACGCAGCCGTGGAGTTTTTCAACATCCGACTCAAATTCCTCGTCGAAGATCTGAACAAAAATCACCCCGATGCTCATTTCACTTACTTAAACACTGCTGGAATCATCACTGCTAGCAATGAGGCGTTGAATATGGTAATTGCACCGAGGTATTATACGGCGTTGTTGCCAACAGATGCATGTCCGTACGATGTTCAACGGTTA…
26	Sa18F.279	ATGGTCGGACCAGATCGGCCGCAGTTTGTTCTCTTCGGATCGTCCATCGTTCAGTTCAGCTTCGACGATGGAGGATGGGGTTCCATTCTCGCCAATCTGTACGCTCGTCGTGCGGACATAGTGCTTAGAGGGTATGCTGGTTGGAATTCCAGGCAAGCTTTGCAAGCGCTCACTCGCATTTTCCCAAAGGATGCTGTGGTACAGCCTTCATTAGTTATAGTGTACTTTGGTGGGAATGACTCGGTGAAGCAAGAGTTAAGTGGCGTCGGTCCTCATGTACCCCTGTCTGAATATGTTGAGAATATGAAAAAGATTGGTCTGTATTTGAAGGGACTCTCGGAGACGACGCGTGTTATCTTTCTCAGTCCCCCAGCAGTCAATGAAGCTCAAATCAAAGAA…
27	Sa7F.445	ATGGTTTCCGATCGACACAAGTTTGACCGCTCTGGGCCGTTGCACCTTTCATGCGTTGACTGGAACAATGCGCATCATCGAAGATCAGTGGCTGCTAGTTTGGTTCAGGGTGTATACATCCTAGAGCGTGATAGACAAGAGAGTCGTCAAGGGCCTGATGCGCTTGCGACCCCGTGGTGGGATTTTTTCAACTTTCAGTTGCTTGAAGTGCTTGAGGATAGGGATGACCAGTCCATATTTGGTGCTGTTTACTGCTACAAATTATTAGACCTTGATAACAATTCGACAAAAACAGGACCTCCTCATTATGTGATTGCTTTCCGCGGCACCATCACAAAAGGGAATGCTGTCACAAATGACTTGCATGTTAATTTGGAACTCATAAGAAATGGGCTTCAT…
28	Sa7F.444	ATGGCTATGAAGGCTGGAAGAAACATGGCTAAGAATGGCATATTCCTTGAGACTCATCTATTCAATCCTCCGTTTCTCTCAGCTCCATTAGAGAGAATCAAGGTTAAGAAGGTGAAACACGGCCTTAGATTCGCTAACAGTCTTGTTAAAGCGGGGCTAGCCGCTGCTGTAAAAACCGGACAACGTGGAAATCCATCGGAAGAAACATTCAGAGTGTTGCAAGAATGGATACCAAATCTGTATGTCAACCCGCATGACGTAATTTGCTCAGAATATGTTGGGTATTTCGAGCACAGAAAAAAGATGGAAGAAATGGGTGCAGGACATATCGAAAAATTAGCTACTCAACATTCTATTGGTAGTCTCTTCATGAGTGCGATAGGGAAGCATCAGGAGTCA…
29	Sa7F.416	ATGGATGATTCTCATAACGAGCATTTGTTTCACAAGTTTGGACCACTCCACTTGAAGAATGTAAATTGGCAAGCGGATGAAGCTAATCATTGTAGAACGGTCGCCGCAAGCTTGGTGGAAGCTGTATACGCACTAGAAAGTGATCGAACAAATTACCGAGAAGGTGCTGACGCACTTGCTTCACCATGGTGGCAATTTTTCAAGTTTGGAAAGATTGATCATCTGGTGGAAGCAAGCTCAGGATCCGTCATCTGTGCAATATTTCGATACAACAACGCAACAGAATGTTCTGCACCATTGTATGTGATTGCATTCCGTGGAACAAGAATCGAATTGGACGAGGATATGAAAGTGAATTATGAACTTATAAAACAAAAGCTCAAGAAAACTCTTCGATTT…
30	Sa192F.44	ATGCAATTAATATTAAATCCTCCTCTCGCTTTCAATCTAACCTCTATTTATACTCTCGGTTCGTTCACCATCTTCGCCACTCTATTCCAAATCTGTATACGCAAGTCGTCGTCGTCTCTGGCTGCCGTTACCGAATCGCATTGTCAGTTTCCTCGTCGGAGTGTTTTCGAAGTTTGTCCGATGACGGGACCAACGCGGCCGCAATTTGTACTGTTTGGATCATCGATTGTGCAAATTAGTTATGGTAATGGTGGATGGGGCGCCACACTCGCTGATATCTACTCTCGAAAGGTAGATATTGTGATGAGAGGCTATTATGGTTGGAATTCAAGGCGAGCTTTGCAGGTCCTGGATCAAGTGTTTCCGAAGGATTCTGCTGTTCAGCCTACATTAGTGATT…
31	Sa22F.70	ATGGCATTTCACAGATCAGTTGGCTTCTTGATTTACTTCCTGCTTCTCATTTCGATATTAAAGAAGGAGAACATTGGTTTTTTGAACGCCGCCAAAACGCCTCGAAATACTACAAACAAGATCCTTGCAGTTGCAGTTTTCGTCTTTGGGACTCAACAGTTGATCCAGGAAACAATAACTTCATTCCTACAGAGTTTAAGAGTTATTTTCCGCCTTACGGCATTCATTTTCAAGATGGCTAGCCTACAGAGATGTTCTCTGACGGACGACTGGTCACTGATTTTTTGGTGTTGCAAAAATGCAGCGTCCTACATCGGTTTGAAAGAATATATTCCTTCGTATTTGGATCCAACACTTAGCTTACAAGACCTTAAAACTGGAGTTAGTTTCGCCTCAGCA…
32	Sa9F.418	ATGATTCCTTTAAACTTTGGCGCGCTTGATCTGAATGAGGCTAATCATCGTAGAACGGTTGCCGCCAGTTTGGTGATGGGTGTGTACGCACTAGATAGTGATCGGAGTGAAAATCGACTAGGAGATGCCGCGTTGGCTCCACCATGGTGGCAATTTTTTAAATTCGAAGTGATTGATCATCTTGCGGATCCAGGCTCTGGATCCATCTACTGTGCGGTATTTCGTAGCAACTCAACAGATTGTTCTGCACCACGGTACGTGATTGCATTTCGTGGAACAATCCTATTCGAAGAGAACAATGACTTGAAAATGATCTGGGAAACTATCCAACAAGAGCTAAAATTCACACATCGGTTTAAGGCAGCGGTGTCGTGCAGTGAAAAATACATCTCGGAAACA…
33	Sa147F.93	ATGAAAAATGTTACAACTATTCTCAACAAATGCATCTACACAATCGGAATAGGAAGCAACGATTACATCAACAACTACTTCATGCCTCAGTTTTACAACTCCAGTGCAAACTACTCCCCATTTGCCTTTGCCAAATTGCTTATCAACGAACACAATCGCATAGTGAAAGGTTTATTTGATCTGGGAGCGAAAAAGATAGCGTTTATTGGAGTTGCACACATTGGATTCACTCCTTATGAGTTCAACTTTCAATGGCCTGGTGTAACAAACGCTACCATGTTAGACCATGCGATTGATTTGTTTAACTTTGAACTCAAGGCATCGGTTAACACTCTTGCTAAAGATGTCCCGGAGGCTAAACTTACTTACTTGAACTCCGTCGGAATCGCTTCCGGTGCA…
34	Sa88F.19	ATGTACGAAGACAAGATGGCGATGAGATCGGCGGCGGTGAAAGTAGTTGCTGATGATCATCAGTCTCAATCTGCTGCCCATCCGTACGCGTTTCATGTTTCTGGTCCGCGGAACGTTGTTTCCCCTAATTGGAAAGACCTCATCGCTTCCAGTTGGAAGGATGGAAACTACAAGAGGACATTCATGGCATGCTTAATCCAGGCAGTCTATTTACTTGAACTCGACAAACAAGAAGGAAGGACTGGACAGAATGCTCTCGCGCCAAACTGGTGGCTTCCATTCAAGTATAATCTGACCAAGACTCTAATTGATGATAGGGATGCATCAATATTTGGTGCAGTATTTGAATGGGATCGTTCTGCTGTCTTGTCCGGCATGATACCTCTTAGGCCTAGTGGA…
35	Sa46F.21-22	ATGAGGCCGAGGATTTATCTGTTTGGGGATTCGATTACGGAAGAGTCGTTTAGCGGTGGAGGTTGGGGAGCTGCTCTGGCTGGTCACTTCGCTCGAACTGCAGATGTGGTGCTGAGAGGTTACAGTGGGTACAACACGAGATGGGCTTTGAATGTGATTGATAAAGTGTTTCCAGATGACAAGGTTTCGCCAATTGCGGTGACAGTGTTCTTTGGAGCAAATGATGCTTGTCTTCCTGATAGATGCTCTGGATTCCAACATGTGCCGATTGCTGAGTTTAAAGAGAATCTCCAGGCCATTGTGTCGTTCTTCAAGAAGCGTTGGCCTGCAACAGAAGTGATCCTTATCAGTCCTCCACCAATTGATGATGAAGTTCGCACTTTGTATCCATATATTGAA…
36	Sa72F.8	ATGGAATCCGAAAGAGATAATTTCAACTTATCGGGACCGCATCATATTACTTGTGTTGATTGGAGTAATGTGCACCATCGCAGATCGGTGGCGGCAAGTTTGGTACAAGGTGTGTACATTTTAGAGCGGGACCGTCAAACAAATCGTCACGGACCACAAGCCCTTGCTTCTCCATGGTGGGATTTTTTTAACTTTGAGTTGCTCCGGTTGATTGTAGATACTGAAGATAGTTCCATATTTGGCGCCGTCTATAAGTTCAAGTTCCCAGAACCTGGAAGTGCAAATCCTTCTTACGTAATTGCTTTTCGTGGCACGATTCCTAAAGGGGATTCGGTGACTAGAGACTTGAAGTTGAATCTTCAATTAATTCAACACGCCCTTCATCAAACTTCTTCGGTA…
37	Sa40F.212	ATGACGGGACCGACGCGGCCGCAGTTCGTTCTCTTCGGTTCTTCGATAGTGCAACTCAGTTACAGCAATGGCGGATGGGCCGCCACGCTCGCGGACATCTATGCTCGGAAGGCAGATATACTGCTGCGAGGTTACTATGGCTGGAATTCAAGACGTGCTCTTCAGGTCCTTCATCAAGTTTTTCCAAAGGATGCTGCTGTTCAGCCTACTTTAGTTATTGTCTATTTTGGTGGTAATGACTCTATGGGGCCTCACTCTTCTGGCTTAGGTCCTCATGTTCCGCTTCCTGAATTTGTTGACAACATGAGAAAAGTTGCGGTTCATTTGAAGAGTCTTTCAAGTACAATACGGATTATCTTCCTTACCTGTCCTCCTGTAAACGAGGCTAAAGTACGTCAA…
38	Sa47F.313	ATGTACGAAGACAAGATGGCGATGAGATCGGCGGCGGTGAAAGTAGTTGCTGATGATCATCAGTCTCAATCTGCTGCCCATCCGTACGCGTTTCATGTTTCTGGTCCGCGGAACGTTGTTTCCCCTAATTGGAAAGACCTCATCGCTTCCAGTTGGAAGGATGGAAACTACAAGAGGACATTCATGGCATGCTTAATCCAGGCAGTCTATTTACTTGAACTCGACAAACAAGAAGGAAGGACTGGACAGAATGCTCTCGCGCCAAACTGGTGGCTTCCATTCAAGTATAATCTGACCAAGACTCTAATAGATGATAGGGATGCATCAATATTTGGTGCAGTATTTGAATGGGATCGTTCTGCTGTCTTGTCCGGCATGATACCTCTTAGGCCTAGTGGA…
39	Sa117F.4	ATGGAAGATCAAATGATGATGATGGATGTCGATGATGTAAACAACTTGGAACAGATTGTGCATCTCAATCCTCGTACCATAACGAAAGCACGTGCCATCTCTTTCGATTCCCATCGCAGAAGCAAACCTTATCTTGTGACACCCGACAAGCAGTACGGTATTGTCACCATTAGTTTCCCTGCAGTTTGGACTGTCGCTGATTTCTTCGATCCTAATGCTGACTCTTTTGGCCTCACCAACATCGATCGCGTGCTCTTTCCATCCCTCAAATACGTCGGTCTCGATAGGTTCGCTAAAGTCAACCAAGCCTTCCAAACCCGATTCGTAAATCTGCTAAAGCACTCTGATCTTCGCAGAGAGGTTGAAAAGGCGGGACAGAAGCAGATTGTGTTCACCGGT…
40	Sa7F.370	ATGTTCGCTCAACTACTGGGTGTCCCTTCGCCTTCTCCATACGCTGATCCGACAACCGTAGGCGCTAGAGTACTTGGTGGTGTCAATTATGCTTCACCTGCTTCTGGCATCCTAGAAGAGTCTGGCAGTCACTATGGAGGGAGATACACCCTGAGCCAGCAAGTTCTAAACTTCCAAGCTACACTGACGACGGATTTGCAAAGGCTGCTTCCTGGAAAAAACTTGACAAGATATCTTGCAAGGTCAATAGCTGTTTTAGTCTTTGGAAGTGATGATTACATCAATAACTATCTCATGGCTCCAGCTTACAACTCTAGCTTCAATTATAAACCTCCTGAATTTGCCAACCTTCTTCTCAACCGCTACGCTCGACATATTCTGGCGTTGAGGAGTATGGGT…
41	Sa40F.233	ATGATCAAAGCCAACTTCCTCCCTTACGGTAGAGATTTCCTCACTCACAGTCCCACTGGTAGATTCAGCAATGGAAAGCTTGCCTCAGATTTCACAGCTGAGTATCTTGGCTTCACTTCCTACCCTCCTGCGTACAGTAGCCCGGAAGCTAATGGAAGCCGGCTTCTCACCGGCGTCAACTTCGCATCCGCTGCTTCCGGTTACTATGATACAACAGCCACCATATACAGAGCAATCTCACTGTCACAACAGCTGACGAATTACAGACAGTACCAAAACATAGTTAAAGAGATGGTGGGCCTCGAAAGTGCTGACAAGATATTTGCAGGTGGGATTCATCTGCTGAGTACCGGAACCAGTGATTTCGCTCAGAACTACTACATAAATCCGATGATGGTT…
42	Sa44F.305	ATGATCAAAGCCAACTTCCTCCCTTACGGTAGAGATTTCCTCACTCACAGTCCCACTGGTAGATTCAGCAATGGAAAGCTTGCCTCAGATTTCACAGCTGAGTATCTTGGCTTCACTTCCTACCCTCCTGCGTACAGTAGCCCGGAAGCTAATGGAAGCCGGCTTCTCACCGGCGTCAACTTCGCATCCGCTGCTTCCGGTTACTATGATACAACAGCCACCATATACAGAGCAATCTCACTGTCACAACAGCTGACGAATTACAGACAGTACCAAAACATAGTTAAAGAGATGGTGGGCCTCGAAAGTGCTGACAAGATATTTGCAGGTGGGATTCATCTGCTGAGTACCGGAACCAGTGATTTCGCTCAGAACTACTACATAAATCCGATGATGGTT…
43	Sa162F.31	ATGCTCAAGGAAACAAATCAGGACTGGAGAGTAATACCCATTCAAGATCAGCTCAAACATTTTGAAGCCCTTGTGAAACAAAACCACCTTGACAAGAAACTGATCCAAAGCTCGCTGTACTTACTCGAATCAGGTTCAAATGACATCTTCAACTACTTCAACCCATTCTATCCACCAACATTGGATCAATGCGCATATGTCCAAGCCATGCTTACTGAAACAACCAATTTAATCACTGAGTTATATAGACTCGGAGCTCGTAGGATCGCCATCATAGGGCTAGGGCCAGTTGGGTGTATTCCAGCCAGGGCTCTTCTTCCTCATGCACCAATTCAAAAATGTTTCGGTAAAATGAACAGAATGGTCAAAGACTATAACCATGGACTTGAAGCTTTAGTC…
44	Sa36F.53	ATGTGCGCAGGGTCGTACGTTGGTGTAAAAGATTACATTCCTCCATTTCTTGATTCAACACTCAGCGTCGAAGAGCTAAAAACTGGAGTCAGTTTCGCCTCCGCTGGCACCGGATTCGACCCCCTCACTGCCAAACTCAGTAACGTTATTCCAATATCTAAGCAAATGGAGTACTTTAGAGAATACAGAACAAATATGGAAAAAGTCATAGGGAAGCAAGAAATGGATCATATCATCAATCACTCCATCTTCGTCATAAGTTCAGGGACTAATGACTTCGGGATCGATTATTTTCTCGTTCCGATTCGACGCCTGAGTTACACTGTTTCCGAATATCAAGACTTTTTACTCAACGAGCTTAAGAAACTCATTCAGGAATTAAGAGACGAAGGATCGAAG…
45	Sa0F.1	AAGACCACCGTTGACGTCTTAGCTGAGCTTCTAGGGTTCTCCGATTACATACCGCCTTTCGCTAGGGCTAGAGGCAGAACCGTGCTTCAAGGCGTGAACTATGCGTCGGCAGCTGCAGGCATTCGACAAGAAACAGGCCTTCAACTTGGTCAAAGGACACCGTTCAGTGGACAAGTGAGAAACTTCCGGACCACAGTGTCACAAATTGCGTACATACTAGGAAGTACTAAGGCTGCCACTGACCACATAAGCCGGTGCATCATCTCCATCGGTTTGGGCAGCAATGACTACTTGAATAACTACTTCATGCCTCTATTTTACTCCTCTAGCCGCCGCTATACTCCCGAACAATGGGCTGATCTCCTGATCCGGGAATACTCTCAAAACCTCAGAAATGTA…
46	Sa64F.61.2	ATGTGGCGGATGGGGCGCTGCGCTCGCCGACTCCTACTCTCGAAAGGTCTCTTCGCTCCATCCATCCATTCAATTCAATTCATCCTCCATCACACCATTAGTAGTCAATTTTGTAAAATGCAGGTGGATGTAATGAATCGAGGTTACTCCGGATACAACACTCGATGGGCTCTCTTCCTCTTGAATCACATTTTCCCACTCGGGACTCCTAATCCGCCGGCTGCGGCAACTGTTTTCTTTGGAGCTAATGACGCTGCGGTCCCTGGGAGAGCCAGCGAAAGGCAACATATTCCTGTTCATGAATACAAGGAAAATCTCAGAAAAATTCTTATCCATATCAAGAACTGCTCACCGGAGATATTCTTGGTTCTAATAACTCCACCGCCGGTTGACGAGGAA…
47	Sa22F.249	ATGGGGATCAGAGCGAAGGTAGTGCTGTTCGGAGACTCCATCACGGAGCAGTCCTTCCGATCCGGCGGTTGGGGCGCTGCTCTCGCCGACTCCTACTCTCGCAAGGTGGATGTATTGAATCGAGGTTACGGCGGATACAACACAAGATGGGCTCTATTCCTCTTGAATCACATTTTCCCTTTCGGGTCATCTGATCCGCCTGGTGCAGCAACTGTTTTCTTCGGTGCTAATGACGCTGCACTTCCCGGGAGGACCAGCGAGAAGCAGCATGTTCCAGTTGATGAGTATAAAGAAAACCTCAGAAATATTCTTCTTCATATCAAGAAATGCTCCCCGGATATATTTTTGGTTCTTATTACTCCACCGCCAGTTGACGAGGAAGGGAGAAAGGAGTATGCC…
48	Sa161F.73	ATGTTCGTTTTGGGAGATTCATCAGTCGACTGTGGTGATAACACGCTATTTTACTCGCTCCTGCATCGGAATCGATCACTCTTCCCCTGCAATGGCTCCGATTCGTCTCTCGTGCCCTACCTCTTAGCTGAGAAAATGGGACTGGAGCAGATGCAGGGATTCTACAGTCTGGATGGATCGATTAGTGGAATGTTGAGGGGTATAAACTTTGGATCAGCCCAAGCCACGATCATGATGAACTCAGGCCGGAGTAATCTTCAGTCCCTTAGCCAACAATTACGCCAAGTGATGGACACATTTCAGCTCTTGCAGTTGCAGCTTGGTGAAAATGCTGCTAAGGATTTGATCAGCTCTTTCATATTTTACATGTCGTTTGGAAAAGATGACTATACAGACATT…
49	Sa02F.434	ATGCTCTTGTTGATCTCTTTCTCATTTTCATCACTTAGGCATCTTCTTATGGCCATGTTTCAGACCACCGCGAACGGCGGTGTTGTTAATGTTATGGTTGTGGTGATATTAACTTTGTGTGTATGGAGTTGTGCGGAGACTTTGGACGAGGATTTAGGCCTTGGAGCTTCTTATATCTTCGGTGACTCGCTTGTCGATGCTGGTAACAATAACTACTTGCCAACTTTATCTAAAGCTAATATCAAACCTAATGGTATCGATTTCAAAGCCTCCGGTGGTAATCCGACCGGAAGGTACACCAATGGCAGAACCATCGGAGACATAGTCGGGGAAGAACTCGGACAGCCGCATTTCGCAGCGCCATTTCTTGCACCGAATACGACGGGGAGAGCGATCTTA…
50	Sa03F.568	ATGTCTCCCCAGAAGTTGTTGCCAATAATCACATACCTGTTATGTATCTCATTGATTTTCAGATTCGAATGTTCTAATGCTCAGCTTGTTCCAGCAGTGTATGTGTTTGGTGACTCACTTGTTGATGTTGGCAACAATAATCACTTGCCTATTTCCATCGCTAAAGCTGATTTCCCTCACAATGGCATGGATTTTCCTACCAAAAAAGCCACCGGCCGCTTCTGCAACGGCAAAAACGCCGCCGATTTTCTCGCGGACAAGCTTGGAGTTTCAACATCCCCACCCTACCTTTCCATAGTATCAAGGCTTAAAAAGAACACTGCACCATTTATTTCCGGCGTGAGCTTCGCTTCCGGTGGCGCCGGAATTTTTAATGGAACAGACAATATCTTGCGGCAG…
51	Sa144F.31	ATGGGATTCTCCTTCTCCAAATGGGTGTGGCTACCTTCTCTTATAGCTTTGACAACTATCTTTGTAACAACTGGACAGCCTTTGGTTCCTGCAATGTTCATTTTTGGTGATTCTGTTGTTGATGCTGGCAACAACAACCGACTGTACACCGTCGTCAAGGCTAACTTCCCTCCTTATGGAAGAGATTTTGTCAACCATATTCCCACCGGAAGGTTCTGTAATGGAAAACTTGCATCAGATTTCACTGTTGAAAACATAGGCTTTACTTCCTACCCACCTGCATATTTAAGTGAAGAAGCTACAGGAAGTAATCTCCTCATCGGTGCTAACTTCGCTTCTGGTGGTTCTGGTTACTTTGACCATACTGCGAAGTTATATAATGCAATATCACTGAGTCAG…
52	Sa00F.210	ATGTCGATCGGGATTTCCTTTCTGCACTGCAATGTGGCACTTCTGATGGCCTTATTCGGATTAATGACTGTAAATGCCGAAGTTCCTGCAGTTTTCATATTCGGAGACTCAACCGCAGACGTTGGAACCAATACTCACTTACCCGATTGCACCGCCCGGGCTGACTTCCCTTACAATGGCATAGATTTTCCTCACTCTAGGCCTACTGGCCGATTCAGCAACGGCTTAAACAGCGCAGATTTCTTGGCGAAGCTGTTTGGTTTACCAAGAAGTCCACCATCATTTCTCTCCCTAGTGAACAACACTAGACTTTTGGACATCAACATGTACAGAGGGATTAACTTCGCTTCCGGTGGGTCTGGAATCCTCAGCGAGACTGGCCGGACCGATAGAGTTGTG…
53	Sa26F.234	ATGCAAGTCCCAATACCTTACAACCATTGTCATCGCTTCGCCGCCGTCATTCTTGTTCTATGTATTTGCACCTCAGTGTCTGAAACCAAGATTGTTCTACCGGGAAATGAAACTATTCCGGCCGTGTTGATCTTTGGTGACTCCATAGTTGACTCAGGAAACAACAATGATCTCAAGTACTCTGTCATCAAGGCTAACTTTCTTCCATACGGACGTGATTTCAATGGAAGTGTTCCCACCGGTCGTTTTTGCAATGGCAGGGTTCCTTCCGACATGATTGCTTCAGAACTGGGCATTAAGGATACAGTACCAGCTTACCTTGATCCAAACTTGAAGTCTAACGATCTTCTAACCGGCGTGTCGTTCGCATCCGGTGGCGCCGGATATGACCCGTTGACG…
54	Sa103F.60	ATGTGCAGTTTTCGACATTTTTTCACCACAATTCTCTTTCTATTTTTCATCAGTATTTCAAAAATATGTTTGAACAATGCAGATGCAGTTCCATCTTTATTTGTATTTGGTGATTCATTAGTTGACGTTGGAAATAATAATTATATCAAAACGAGGTCGAAAGCTGATAAAAAGCAAAATGGAATTGATTTTGGAGGACCAACTGGAAGATTCACCAATGGTAGAGTTATCGTTGATATTTTAGGTCAAAAGCTCGGCCTTGACGACTTCATTCCACCGTACTTGGCCCCGACGACGACGGGGCCGGTTGTATTAAAAGGTGTCAATTACGGATCAGGAAGCTCTGGCATTCTCAACGAAACTGGAATCACATTTTTTAAAAATAACATCAACATGGAT…
55	Sa25F.118	ATGACATTGGCCAAATGTAATTATAAACCATATGGAATCGATCTTGGTGGTAACCCAACTGGAAGATTCACAAATGGTAGAACAATGGTTGATGTTTTAGGTCAAAAGCTTGGTATTAAAGGATTCATACCACCCTATACGGCGGCGACAACCGTCGGAAAAGTTGTTCTCAAAGGTGTTAATTATGCGTCAGGGAGCGCCGGAATTCTCAAGTATACTGGAAAAATAGCAATACAAAATATCAACATGAATGACCAAATTGATAACTTTGCGAACACATCACAAGCCATAAAATCGATCATCGGAAAAAACTCCGCACAAAAACTACTGAAAAAGGATTCCTTGTTCCTAATCGCAATCGGATCGAATGACTTCATCCTAAACTATCTATTCCCGATC…
56	Sa95F.99	ATGGCTTGTGTTATGGTGAAGAAGTTGTTGTTGTGTGTGATAGGAGTGGTGCTTACCTTAGGGTTTGGTGTAGTTATTGCTCAACCTCAAGTGCCAGGCTACTTCATTTTTGGTGACTCTTTGGTAGACAATGGTAACAACAATAACATTGCTTCTTTAGCTATGGCTAACTACTTGCCTTATGGGATTGATTTCGTCCCTCCGGGTCCGACCGGTAGGTTTTCCAACGGCAAGACCACCGTCGATGTCATATCTGAGCTTTTGGGGTTCCGAAATTACATACCGCCATTCGCTAGTGCTAGAGGCAGAGCTGTCCTTGGCGGTGTCAACTTTGCCTCCGCGGCGGCAGGCATTCGTGATGAAACAGGCCAGCAGCTAGGCGGAAGGACTCCATTCAGC…
Amino acid sequences of SaGELP family
No.	Name	Sequence
1	Sa0F.11	MSPITLLMIVFISISMLISLTKVEALTKRNPSVPAVFVFGDSTVDPGNNNFIGTTFRSDFPPYGQDLPDHMPTGRFSDGRLVTDFVASYAGVKDFIPPYLNPELSLDELMTGVSFASAGSGFDPLTPQISSTLSLPEQLEYFREYKTRMTQKIGKKKTDELISKSVYVLSAGTNDFVVNYITLPLRRQSYSVSQFENFILQYLRQFIKALMIEGARKMAIGGLPPIGCLPIVITLYSKSNPLQRGCIDSYSAIARSYNKLLTKELTNMATQVSNHGIKLVYADIYNPVITMIQQHDRFGFEKVTSGCCGTGYLEASFLCNYKSWVCNNASKYVFFDSIHPTERTYYNVFMSLRPIIDYILKD
2	Sa0F.223	MRSFCAYLCVLVLALLFLGGRLTESKCQFKAIFNFGDSNSDTGGFWAAFPAQSGPFGMTYFKRPVGRATDGRLMVDFLAQAFGIPYLSPYLQSIGSDFRHGANFATLASTVLYPQTSLYVSGLSPFSLGIQVRQLKEFKVRVDQHHSSGSTNLPPRDIFGKSLYTFYIGQNDFTSELKSMSTVGVQKILPYVVNEIANSVKEIYGIGGRTFWIMNMAPVGCYPALLTQLPHKTSDLDKFGCLKPINDAVTNYNTMLKNKVTETRQSLRGATITLVDVYSLLLELFRYPTKHGLQNGVKACCGHGGGMYNYNKEVYCGNSKVVNGKKVTASACKDPQRYVSWDGVHATEVANKLVTAAILNGSSFDPSFPVHRVCDLHRIG
3	Sa0F.262	MRILFCLWMFSTNLLLMRNVQASGKVPAVIVFGDSSVDSGNNNHISTMLRSNFEPYGRDFKGGKPTGRFSNGKIPTDFISQAFGIKPTVPAYLDPAYNISHFADGVSFASAGTGYDNATSNVLSVIPLWKEVEYYKDYQKKLRNYLGNDEANKVLSEAMYLTSMGTNDFLENYYMFPGTQRRYTIEEYQVFLSGVAENFVTQLYTLGARKISIGGVPPMGCLPLERSKNFFGGGECVEEYNEVARSFNSKLSVMVERLNRNLTGIQLVLSNPYEAMLDLIKNPNTYGFTNAAVACCATGMFEMGYMCNRFNTFTCTDASKYVFWDSFHPTEKANQIMAEHVVKTSLSQFMV
4	Sa0F.41	MSLDASNSLIIVILTTLFLSSFSVVAVLKPSAPALYVFGDSLFDSGNNNLLPTLARANFPPYGVDFVNGATGRFSDGKTVADFIAEYLGLPYAPPYMTIRRRFHLAGINYASGSCGILPETGTILGKCLNLNEQITLFRTTVIKKLSSRLNMDALTYHLSKSIFIISIGSNDYINNYLQPQLYNTSQRYTPETFAQYLIDLLMERLMRLYRLGARKVIVFEIGPVGCIPSMTRKHKHDGQCVEEFNKLVNHFNKLLLVTLRNLTSTLPESMFIDGRAHWIGYDAVTQPQKYGLIDSVNPCCKTWLNGTSGCIPFTSPCGNIDQHYFWDAFHLTQSVYNVIASRCFNGTDVCFPMNVEQLVRV
5	Sa0F.898	MFTQHIFIKHSTICRQSRDSSSATMSLLLYLSYMFLTLVSETQARVPAVIVFGDSSVDSGNNNWYPTPLKSNFEPYGRDFSGGKATGRFCNGRLGPDFISEGFGLKPVVPAYLDPSYTIADFATGVNFASAGTGFDNATSDVMNVIPMWKEVEYYKEYQQRLRSYLGEAKANEVLTEALYIVSLGTNDFLENYYILPERQSQYTVTEYSDFLLELAQNFITEIYSLGVRKISLTSLPPMGCLPLERTEDFFQNFECNEEYNAVASEFNGKLEKLGNYLNLRLSGMKIYFSHVYPIFLEMIQKPTLFGFEVAAQACCGTGLLEMGFMCNRHNPFTCDDANKYIFWDAFHPTEKTVQTIIEYLKPELHAYFL
6	Sa105F.31	MKLSSYLITIFLILVPFLLSHEAGLVLATEKHGRYKKALFVFGDSLFDPGNNQYLNSSSSSQLGTATTWPYGVNYFRRPTGRLSDGRIVPDFLAQFARLPILPPYLQPGPKLLTLGANFASAGAGVLSETHPGTISLQQQLNYFKDVEKKLQELLGADSTKKLLMDAVYLFSIGGNDYFSFYMTRSKSANLTQPQKRAFVANVTHTLSQILQEVYDIGGRKIGFQNAGPLGCAPGMKVMNGETGTGCISGLSELARLHNRALAIVLKRLEIKNQGFKYSIFNYYQALSQRIRTPSNFGFKDGDDACCGPMDCGKNGALVCSDPNEYVWFDGGHTTQRANYQLAQLIWAGQPNVTGPLNFRQFFI
7	Sa10F.217	MTSTKTTPFQTHAAQAQLLLISISLMIFHLADVSSSSSSSNKVPAIVVFGDSSVDAGNNNQISTVLKSNFEPYGRDFIGSKPTGRFSNGRIPPDFISEAFGLKPIVPAYLDPSYNIADFATGVCFASAGTGFDNVTSDVLRVIPLWKELEYYKEYQTKLKEFLGEKKANEILTEALYVISLGTNDFLENYYTLPTRRNQFTVGQFGDFLLEIAQSFIKELYELGARKVSLAGLPPMGCLPMERAQNAMNGRVCVGEYNFVAWDFNNKMNNVADYMNGELVGIKIVISNPYDIFAQMIQSPSSFGYEVTGVACCGTGTYEMSYMCDKYNPFTCKDADKYIFWDSFHPTEKTNRIVTQHLLPTLLAEFN
8	Sa10F.441	MKILFISCMFLLNLLLMQSVEASGKVPAVIVFGDSSVDSGNNNHISTMLRSNFEPYGRDFQGGKATGRFSNGKIPTDFISQAFGIKPTVPAYLDPAYNISHFADGVCFASAGTGYDNATSNVLSVIPLWKEVEYYKDYQKKLREYLGNEKANEVLSEAMYLISMGTNDFLENYYMFPGTQRRYTIEEYQVFLSGVAENFLTQLYNLGARKISIGGIPPMGCLPLERSRNFFGRGECVEEYNEVARSFNSKLNVMVEKLNQNLTGIQLVMSSPYDAMLEIIKNPNLYGFTNAAVACCATGMFEMGYMCNRFNRFTCTDASKYVFWDSFHPTEKTNQIMAEHVVKNSLSKFMV
9	Sa110F.22	MGNLSAFVCRVVIFNFLVSLTLKSTDAEDLLPVFVFGDSTADVGTNDFLPECQVRADVLYNGIDYPLQVPTGRYSNGYNTLDFIAMLLGHNESPLPFLNLSSMAMSNFREEILQGVNFASGGSGILSDTGKQFVQVIPFSQQIEQYISVYSNITEAIGSEKARNLIQKAIFLFSIGSNDILEYYQFNPSMKSDQFLKMLVTQYKLHLKVSQIQFQIFVVKFIIHQKVYFNLSYKLQQILQKVMELGATKLGILSVSAIGCVPRARSFNTTGGCLDILNSYAQTFFELIQDALLELGKEYQGMMYSLGDIFKMTSLVLDSPTHQGFTEIKSACCGNGSFNGEAPCNISANVCSDRNEYLFWDRYHPSQAAANLTASVLYDGPVVLVSPINFRQLAGSNA
10	Sa116F.110	MAAPSSPTHILFLLFAFVSVCIHNVICYDFSHPAIFNFGDSNSDTGNLVAGIGAHLYPPNGQSYFKIPSGRFSDGRLIIDFLADAMDLPFLNAYLEAVGAPIFHKGCNFAAAGSTIHPATVTSVSPFSFGIQVEQFIRFQSRVLELLAKGRKYSKYLPSASYFNDALFTFDIGQNDLAGAFYSKSFDQVVAGIPSTLLEFETGLQTLYEHGARKFWIHNTGPLGCLAQNIAYFGTDPFKLDNLGCVTGHNQAANLFNLQLHGLTKKFQTQKPDATVTYIDIFAIKSNLIANYSNYGFEHPITVCCGTGGPPLNYNSQITCGETKVINGTKVTVEACEDSSEYINWDGIHYTEAANNFVASQILTGKYSDPPFADKMPFLLPLKF
11	Sa116F.65	MLIVTGQFDWYWIYLADFKYPEKSSKREFLQIFITPFQHHLATFPILLKLHFSVSGMEFSSSVVSTLLALLWFSCSKLVTAHSGKECKFPAIYNFGDSNSDTGGLSAAFGQAGYPAGITYFHHPAGRYSDGRLVIDFIAESFGLPHLSAYLDSVGSNFSHGANFATAGSTIRVMNSTLQRSGFSPFSLITMDVQFHDFQNRSQMFDGIYRTLLPKAEDFSKALYTFDIGQNDLTAGYFDNKTTDEVRASVPDILDKFSLVVRNVYSRGGRYFWIHNTGPVGCLPYVIDRLRPRASEMDKVGCATPFNQAAQYFNLKLKDAVVQLRKDLPSAVITYVDMYTAKYTLITHARKYGFDHPLRSCCGRGGKYNYNKNVECGATKMINGTQVIIAPACEKPSTA…
12	Sa121F.27	MVSDPVFVLCLVLTLGFGVVFADPQVPGYFIFGDSLVDNGNNNNIASLAMANYLPYGIDFPRGPTGRFCNGKTTVDVIAELLGFSDYTPPFASARGRAVLQGVNYASAAAGIREETGQQLGQRTPFSGQVRNYRTTVSQIVNILGSEEAASDHLSRCIFSIGLGSNDYLNNYFMPLVYSSSRRYTPEQWADLLIREYAQNLRNIYEYGARKFVLIGVGQVGCSPSILAQRSPDGRTCVAEVNNANKIFNSKLKSLVDESNSNYRDAQFIYIDAYGIFDDLRTKPGSYGLRVTNAGCCGVGRNNGQITCLPLQRPCRNRREYLFWDAFHPTEVANAVVARRSYNAQKSSDAHPFDIRRLAQL
13	Sa129F.2	MATQSILTTFLIILSISTCSIRSVLSQEALPGTNKALFIFGDSLYDAGNNVYEPNNSHINYHPYGRTYFNNTPTGRVCDGRIIPDFIADYMKIPFIKPYSQPGFTNYTDGANFASSGSSVLPESRPSSTYLALQLSNFETMASKIESERGGKTANLLVSNAIYLITMGGNDYVDLPSNTSSDARKRKVAKVIRTLSSTIQNLHGRGARKFAIQNIGPLGCMPWMKNQAGSKGECVYGLTISSKIHNIALHNLLKELQSSLPGFIYSLFDSYTAVAMRTRYPNRYGFRVGESACCGSGAFNGEYTCGGLRGTVKYNECGKPSEYVWFDAAHPSDAANKQLSDLFWGGSSSYVWPMNLKALYESI
14	Sa12F.49	MAMNALAIASIVVCSFFIAFFTNAALADPQVPCYFVFGDSLADPGNNNNLKTIAKANYAPYGVDFPGGANPTGRFTNGRTYADFIAQSLGFTSFVPSIANAAAGEFIGVNYASGAAGILDDTGKTNGDRISLGRQLAAHQRIVNQLPAQLKLSKEDVTSLLNKCIYTIGIGSNDYVNNYFMPGSYDSSAQYTPAAFADLLVSEHNRLVKSLYDLGARKMAFVGVGHIGFTPYEFKLQWPGVQNATTLNNAVDMFNDALKASVDSLLTDLPDSTFTYLNTTGISSDGPAAPLSAITSCCQNIDSVSQITCKRGDSAICPNRAKALFFDNIHTTEAVNQAVAARYYTAKNPSDAIPYDIQTLATQ
15	Sa136F.34	MDGSVSHLLLMFNLSAILLLLSSTFYRPCNGREHQKPKATAFFIFGDSTVDPGNNNYITSNPENRANYKPYGRNGFFAYPTGRFSDGRISVDFIAEKANLPLIPPFMQPFVDRTNGVNFASGGAGILPETNQGNVIDLQTQLKNFEIVRKSLAQKLGNAESKTTLSEAVYFISIGSNDYLGGYLGSPKMQAVYPPQAYIEIVVGNLTGTIQFLYEKGARKFGFISLIPLGCLPALRAINPVPNANGACFEQANMLATAHNNAISNALQNLRRSLKGFKYSNTQSYNWFQDRIEHPYKHGFKDGVNACCGTGRYRGTNTCGGTKSIKQYDVCDESEEHVFWDSYHASEKIHEQLANDLWEGPDSFVGPYKLKDLFRNY
16	Sa13F.102	MVWSNLVFVLGLVLTLSFELVFADPQVPGFFIFGDSLVDNGNNNNQPSLAMANYLPYGIDFRPPGPTGRFSNGKTTIDVTSELLGFSDYIPPFVTARGRAVLKGVNYASAAAGIREETGQQLGERTPFSGQVRNFRTTVSQIVNILGSEKAAANHLSKCIISIGLGSNDYLNNYFMPLVYSSSRRYSPEQWADVLIREYAQNLRRIYNYGARKFVLIGVGQVGCSPSILAQRSPDGRTCVAEVNNANKMFNTKLKSLVDEYNDKHKDAKFIYIDAYGIFNDLRTKPRSYGLKVTNKGCCGVGRNNGQITCLPLQTPCRNRKEYLFWDAFHPTEVVNTLVAKRSYRAKKSSDAHPIDIRRLAKLKL
17	Sa13F.118	MRAMVIYLLGIVSAVCCSLIADHGSATSPWLTYQAIFNFGDSLSDTGNLILSGTGTFPAAAAKLPYGETFFKQPTGRFSDGRLMVDFFAEASGIPYLQPYLSLSENQSVPNGVNFAVAGATALDFDFFVKKNLGQALTTKDCLDVQINWFKQIKPSLCPTKRSDCTNYFKKTLFLVGEIGGNDYNYPLFSGLISFKEVRSLVPIIVKAIVNATIMLIEEGAVELMVPGNLPVGCSASYLTLFQTPNKADYDECGCLKRYNRLAKQHNKQLQSALRKLRQRYSHVRIIYADYYHASLPLFRNPHHFGFKNGALTACCGSGGLYNFNLLDVCGQSGSTVCKDPSTFANWDGLHLTEAAYHLIAQSLINGSNTSPRF
18	Sa14F.252.1	MCKLLYSCWLALTVYCVSDICLASEVLPAMFIFGDSILEVGNNNYIPSLSKANFVPNGIDFGGPTGRFTNGRTIIDILGQQIGVDGFIPPYLAPTTTGPVILKGVNYASGSGGILKQTGTLFIANINMDEQIDNFANTRENIVTLIGKSAAEKLLRNNSLFTVAMGSNDFINNYLIPIISTGKQILIPPEIFVSTLIKRYRIQFQRLHAMDARKFLVANVAPIGCIPYLRDTNPTDDQTHCFEYANHLAQLFNNGLEILLTELSTELEGFAFVYSNTYHMFSDIVQTTSYGTNYHHHLFIFSRFYFSYVNFCTFFVLFCFSGFENADSACCYLGGRHGGLIPCSSLSHLCSDRSKYVFWDPYHPTDAANAIIAYRLFNSRAPDVWPMNVQQILKV
19	Sa184F.22	MRLYISYCAVLLVLALSFFTLLAEPQVPCYFIFGDSLVDNGNNNAIASLARANYFPYGIDFQYGPTGRFSNGLTTVDVISRLLGFENYIPPFASAGGEEILRGVNFASAAAGIREETGRQLGARIPFSGQVRNYQTTVSRIVNIIGDENQAAEYLSKCIISIGLGSNDYLNNYFMPNYYNTGSRYTTEEYAELLIQDYTRYLRALYDYGGRKFVLISIGQIGCSPNELAQNSPDGTTCVSKINEANRIFNSRLKGLVNEFNNALPNGKAIYINAYDIFQDMINRPYAFGLTVTNRGCCGVGRNNGEITCLPGQMPCANRDEYLFWDAFHPTEAANIIIGRRSYSAEASSDAYPMDIRRLAQL
20	Sa18F.151	MAALRTFLVPLLLLFYCCISASLNAQYQRSRQTKTCKFPAIFNFGDSNSDTGGISAVFYPIVAPYGQTFFKKAVGRASDGRLMVDFFAAGLGLPYLSAYLNSAGANYHHGANFATGSSTIMMPNETFFRGGRSPFNLQIQIAQFIQFKARVLDPGKYIYNRVPKPKTFQKAIYTIDIGQNDIADALYKTTHDQALAAIPAMIEQVATAIRILHYQGGKAFWVHNTGPIGCLPFTLTYVSNPPPLGYLDESGCIKDHNEVAQEFNRQLKEKIASLRQEMSDALFTYVDVYAAKYELISDAAKQGFGPPAGICCGYFKDGVRIRCANREIVNGTEIFGKSCSNPFSFISWDGVHYTEAANYWLATRIVNGIYSDPPNPMNQACQKQQKG
21	Sa1F.117	MAAWNVVKGATVKSGRKQHSSLKLFVFGDSYADTGNWGENDAPSWKQPYGISFPGKPSGRFSDGRVLTDYIASFLKIESPVTYRRRNSNAENLKHGMNFAYGGTGVFTTYAVNAPNMTTQINQFQQLLEDEVYSNRDIKSSIALVSLGGNDYGTYLAEKGNTQEIYAFAESVMNQLELNLRRISGLGVGKICVTAIEPLGCLPSFTASASYRNCSEKGNSLAMLHNQLLNQTISKLNESSSTFTVLDLYDAFMSVFKKQGYEPGSKKSEGVLKPCCMGVTSEYQCGSVVANNGTSRRMYEICANKNSTFFWDTVHPAQSGWRAAYTSLKHTLRKLQHKSRSHK
22	Sa207F.22	MVKMKFEVTLVVMLLGLFTEADECEGKVVQFIFGDSLSEVGNNLRLPKSLAKASLPWYGIDFGNGVPTGRFCNGRTVADILGDEMGFPRPPPLLDPDITEDAIIKNGLSYASGGGGILNESGTLFIQRFSLWKQIELFEGTQKLIRAKVGEAEANKFFQESRYIVASGSNDFINNYLFPVYYNDSSKYNDRQFIKYLSNTFEMQLRALYKLGARQVMVFGLGPLGCIPLQRVLSISGECKYKANVLSQKFNRAGIRLLTRLSKQLPNSTFIFGDVYDIVYDMISNPAKHGFNNSNAPCCSFGGIRPSITCTPVSTLCKDRTKYVFWDEYHPTDRANEIVAKELLSKLGVISKSNTTSEISSSPAPALAPSIR
23	Sa20F.120	MGSVSFRKGSNSKTCAKSCLCDTRSCCVFCVTLIWHDTSLVKYVLLRKTITQHRKTMFRFPKILFQVAAFNLLISYVHPLLKLPENVTIPAVFIFGDSIVDTGNNNRLNTIVKANFKPYGRDFKDGKSTGRFSNGMVPSDIAVSEFGIKDYLPPYLDPSLPDEELLTGVCFASSGAGFDPLTPRIVAVKSLQAQLKMFEEYKTRIQRIAGIDRANFIIANSLYFLAAGTNDIVNTYFHLSFRSLRYNVDSYTDLMASSASKFLKKLHHLGARRIGFFSIPNIGCTPSQRTLYGGIERACADICDKPAQQFNSKIKKIIKLLNIELSGVSIGYMDGYNTLLDIIRNKEKYGNISRGLQLHTFHCYQISIHPLIHTVLAGFKYADVGCCGTGLYEVSFMCN…
24	Sa217F.43	MRLYLSFYAVVLVLPFSFFKLLAKPQVPCYFIFGDSLVDNGNNNAIASLARANYFPYGIDFQDGPTGRFSNGLTTVDVISRLLGFEDYIPPFASAGGEEILRGVNFASAAAGIREETGRQLGARIPFGGQVRNYQTTVSRIVNIIGDENQAAQYLSKCIISIGLGSNDYLNNYFMPNYYNTGSRYTTEEYAELLIQDYTRYLRALYDYGGRKFVLISIGQIGLKGLVNEFNNALPDGKAIYINAYDIFQDMVNRPFAFGLTVTNRGCCGVGRNNGEITCLPGQMPCANRDEYLFWDAFRPTEAANIIIGRRSYSAEASSDAYPMDIRRLAQL
25	Sa248F.34	MASVHYHFAIFVILILACSFANAQDSTTLVSAIITFGDSAADVGNNDYLYTIFKANYPPYGRDFAGHKATGRFCNGKLATDITAETLGFTSYAPPYLSGPSGKELLLGANFASAGSGYDDKTAYLSHAISLSQQLEYFKEYKGKLTNSVGSTKADSIIDGALFLVSFGPSDFVQNYYVNPYVNKVYTVDQYSSMLVKIMSDFITNLHGLGATRIGVTSLPPLGCLPAARTLFGNHQSGCVQRINQDSQNFNKKASSAASSLLKQLPNLKLVIFDIYKPLYDLVKSPSNFGFTEANKGCCGTGAVETTVLLCNPKSIGTCSNASTYVFWDSVHPSEAANQVLADALIVQGFALL
26	Sa24F.223	MDALSIALFLILIHSPLTIKVNANHHLQLISPPFPTILVFGDSTVDTGTNNHIPTVFRSNHLPYGRDFPNSIPTGRFSNGRLSVDMIATSLKIKTFVPPFLDPHLSTLDLITGVSFASGGCGFDNTTGLLVSVPVDVQLHQFDEYVLKLNQIIGAEETDKILTEALVIISAGTNDFVMNYYNNLIRSLDQTIAEYQTFLLSKMQNVIKSLYDKGCRKMIIVGLPPIGCLPIQMTVDLDNTECVKGQNDDALVFNKKLSREVFKMRMQFPGIKICQTDIYRVLDDMVQNPSKYGFEVTNAGCCGSGLIEAGPLCNVFSTACEDSRKYVFWDAIHPTEAAYAYIAHSIVRQCLA
27	Sa24F.262	MAEKFGVVIVTMLVILAAMETGTMAVGSSKTVTFVFGDSLTEVGNNNYLQYSLAKSNFPWYGIDYPGGKATGRFTNGRTIGDIISEKLGIVSPPPYLSLSATDDKMLGGVNYASGGAGILNTTGVYFVQRLTFDDQISNFAKTKAAISNKIGVNAATVLVNKAIFFIGMGSNDYVNNYMLFLASGKKLTHERFVELLVNTLEQQFTELHQLGARKIVFHGLGPLGCIPSQRVKTNTGECLKQLNEWVMAFNTQVQKLTSKLNTKLPDAEFIFADTYSAVSDLISRPAAYGFKIANTSCCNVDSTVGGLCLPNSKLCKDRREYVFWDAYHPSDAANVVLAGKLFDTIFPASGIAAAAAPTSSK
28	Sa258F.41	MASDILYRLHTPVAIFMLLIFTNAAIRNTHNNRSKLRAAFVFGDSTVDSGNNNFLLTDFRSNFPPYGHDFAGSEPTGRFTDGRLVTDFIASYVGIKDYIPPYLDPTLDVEDLKTGVCFASAATGFDPLTAKLSNVLSIPSQLENFREYRKKMEKVIGKTEMDEIIDRSGVIISAGTNDLSVNYFLLPVRRKRFTVTEYQQYLLGNLKQLLQELMKDGIKTFGVVGLPPIGCLPFVITLYSKDESGARMCIESLSSVARSYNEMVKNELSSEFYKSNGVKVVYADIYTPLDGIVRNPRKFGFEEVYEGCCGTGVLETSFVCNPTSYLCSNVSEYVFFDAVHPTEKTYSILFEYVKPVLDEALNGL
29	Sa26F.146	MEFSSIIFFIFFFFSATVTFAAPVSQQQPYESIFNFGDSLSDVGNLILANPKAFAVVGKLPYGQTFFGRPTGRCSDGRLIVDFLAEAYGLPFMPPYLNISKPEQGLKGANFAVAGATALDKDFFSKLGIGGLLWTNNSLSVQVSWFKKLKTSICASQKDCGAFLNKSLFLVGEIGANDYNYVGLTGASNQDLRAMVPELIKSISTTVTALVQEGAVNIIVPGNVPLGCSPVYLTFLQSDDKKDYDRYGCLNVFNSLSIYHNQLLLSEIAKLRKAHTHARIMYADYYKASMRFVYAPSQFGFGEHTKLRVCCGGGGEYNVDLGAWCGMDGATTCKDPSKYAGWDGLHLTEAAYRHMTVALVNGSITSPPLAQPVSAF
30	Sa26F.158	MELHASYYCAVMLGLCLSFCNVLAEPQVPCYFIFGDSLVDNGNNNGIASLARANYFPYGIDFQNGPTGRFSNGLTTVDVISKLLGFEDYIPSYASASGQQILRGVNYASAAAGIREETGQQLGARIPFSGQVRNYQTTVSQVVNILGDENQAATYLSKCIYSIGLGSNDYLNNYFMPTYYNTGSRYTTEQYADLLIQDYSRHLRTLYDYGGRKFALISIGQIGCSPNELAQNSQDGATCVSKINEANRVFNSKLKALVDQFNNDLPDGRAIYINAYDIFQDMIDRPSAFGFTEVKSGCCGVGRNNGEITCLPGQMPCLNRNQYLFWDAFHPTEAANIVVGRRSYSAEASSDAYPIDIRRLAQL
31	Sa27F.42	MGAFRITFSGFVIFIFYVAISVADAVDSVCNFPAIYNFGDSNSDTGAISAAFLPIPAPYGELFFKKPAGRDCDGRLVIDFIAERLKLPYLSAYLDSIGTNYRHGANFATGGSTIQKPNETIYQYGISPFYLGMQVSHYDQFRERTGELYKQAKSELDRSKLPRPEDFTKALYTFDIGQNDLSMGFRKMNMDQLTQTLPDIVGEFASAVTHLYQNGARYFWVHNTGPVGCMPVAVMYNKNPAPGYLDEVGCARQQNDIAVEFNKQLKERVAKLRKELQDAAVTYVDMHAEKYGLIKDAKKQGFTDPMTPCCGNHTNGANVWCGTKGYVNNGEVFGGACSNPEQVISWDGVHYSQAANQWFADRILSGSLSDPHVPITRACFKQ
32	Sa28F.36	MELHHHFSLSNNSSCIGTLLVCFSVLLCCVGVQSVLVLDIPESQRFPALLVFGDSIVDPGNNNHMATPSRADYPPYGQDFLGGKVTGRFSNGKLATDFIAQELSIKETLPAYLADDLQSSDLPTGVSFASGGCGYDPMSSVTGVATTLDQQLEQFKEYKSKLNSMLGEDETKHILSRGLVIVVAGSNDIANTYFGPTIRRSQYDINSYTDFISKLARDFLTGVYGVGARRIGMLSVPPLGCVPSQRTIAGGIERKCVERFNQASLLLNSKLSSILDSFNDEYTDARAVMVDIYSPVMELIQHPHRNGFEVVDKGCCGTGEIEVTILCSDYVHVKTCSDPTKYVFWDSFHPTQAAYELLASRILKPAVPKLYL
33	Sa28F.37	MYTHTIQCEVLKSIQSRASLISKLWLVLFCTGLLLSFSHVQSKLPLPKDIKFSALLVFGDSIVDPGNNNNVHTPSKANHRPYGKDFIGGVPTGRFCDGMVPSDFIAQALSIKQLLPAYLDPNLQPSDLPTGVSFASGGCGYDPLSAVFGELYKEGARWIALFSAPPLGCLPSQRTLAGGDARECVESYNQASMLFNSKLSSVVNTFSEKNSDAQALFIDIYNPLMELIQNPKQNGFDVADKGCCGTGNIEVTFLCSEYNTLQPLKTCSDPTKYVFWDSFHPTQATYKLILSAKIYAEYF
34	Sa28F.38	MDPMFFKNSGIRSLNRYTNAPLLAFYCVFFLCNDCIESRLDKQFPALLMFGDSIADPGNNNNLLTVSKADYPPYGRDLKAGVPLGRFSNGKCSGDFIASELSIKEYLPAYHDPSLQPDDLLTGVSFASGGSGYDPIASFAAISITLRQQLDHFKEYKTKLYTFVGENQTNNVISRALFGVAASTNDIMVAYFISGIRRSEYDISSYTSFIASLAAEFFDNLYAEGARRLLILNAMPIGCLPIQRTLHGGLGRECDEEQNQAAELFNSKLLSVIDSFNEKYTDAKAAIIDLYDPLLSLIKNPKQNGFEVADKGCCGTGMYEAVFLCSQIQTTCSDASRYVFWDSVHPTETTYQKLISLETLLPHFF
35	Sa28F.39	MEFGSTKNSGFAAVLVMVMVFSKWTCVESVISIPEDKRFPALVLFGDSIADPGNNNNMLTTAKADFPPYGKDFKGGVSSGRFSNGKIPGDFIASELSIKEYLPAYRDPNLKPAELLTGVSFASGGCGYDPLTSLLGPATTLSEQLELFKEYKSKLHSLVGENQTNYIVARGLFGVVASSNDIVNTYYTSGLRRAHYDISSYTSLMATFAADFFADLYEVGARRIGILNAPPLGCIPVERTVSGGPERECVEEHNKAAQNFNKKLSSVVKSFNSKYTDAKAVIVDVYNPLLDLIKNPKQNGFDVADRGCCGTGLIEAVILCNQGGHPKTCPDASKYVFWDGFHPTETAYEKLITTNIAKVLPQFF
36	Sa29F.188.1	MGSVHHFVIAVTLVLACTSAYAQDSTTLVSAIITFGDSAADVGNNDYLYTIFKANYPPYGRDFAGHKATGRFCNGKLATDITAETLGFTSYAPPYLSGPSGKSLLLGANFASAGSGYDDKTAYLSHAISLTQQVEYFKEYKGKLTKSVGSTKANSLIEGALFLVSFGPSDFLQNYYVNPYVNKVYTVDQYSSSLVKTLSNLIKTLHGLGATRIGVTSLPPLGCLPAARTLFGNHQSGCVQRINQDSQNFNKKASSAAASLLKQLKDLKLVIFDIYKPLDDLVKSPSKSGTIINKNKITYKLQLLNLNVVFPLYDFVAGFTEANKGCCGTGVVETTIFLCNPKSIGTCSNASTYVFWDSVHPSEAANQVIADALIVQGFALL
37	Sa29F.343	MGLSVRSYLLFFLPCILLLLIQSVESEVKKIPALIVFGDSSVDSGNNNWYPTPLKSNFEPYGRDFIGGKPTGRFSNGRVAPDLMSEAFGLKPLVPAYLDPSCTIADFATGVNFASAGTGFDEATSQVLNVIPLWKEIEYYKEYQQRLREYLGTENADYILSEAVYVISVGTNDFLENYYILPERRSQFTATEYSDFLIEKAQIFTTELYNLGVRKISLTSLTPMGCLPLERTLNIFHGSECNEEYNNVAMDFNAKLRGLGLYLNEKLLGMKIHFSDLYYIVLQMIQKPETLGFEVAAEACCGTGLFEMSYLCNRHSLFTCDDANKYVFWDSFHPTERTARVVVDDLMPKLKEYYL
38	Sa2F.358	MSTPVLCRTVFLLFLSFAGNGASVVEARQHRFQTPSKLFVFGDSYADTGNTNKSLTSAWKVPYGITFPGVPSGRYSDGRVLTDYIARFLGIKSPVPYKVMNSGPKRIQHGVNFAYGGTGVFQTASSDPNMTTQIDFMQQIVNKRVYSSDDLLGSVALVTLSGNDYAYFISENSSAQALMEFIPTVVNQLVVNIQRVKAMGVKKVIVTSLQPLGCLPRITILTSFKSCNEAQNSAVQFHNLLLQQAVAKLNKGTQGPPPYIILDLYTSFMSILQNNSTKQESVKFKNLLKLCCAGTSNVTVCGSTSANGEKLYTVCDDPQSSFYWDTVHPSQEGWRTVSLGLQTTLEKNLL
39	Sa314F.6	MACCDLMKIMLVCVLGVIFALSFEVLAQAQPAQVPGYFVFGDSLVDNGNNNNIASLAMANYFPYGIDFVPRGPTGRFSNGKTTVDVISQLLGLPNYIPPFSRARGRAVLQGVNYASAAAGIRDETGQQLGARTPFSGQVRNYQATVAQITTILGSAQAAADHLSRCIFSIGLGSNDYLNNYFMPLVYSSSRRFTPDQWADLLIQQYSQNLRTIYNFGARKFVLIGVGQVGCSPGVLAQRSRDGTTCVAEINNANMIFNTKLKALVDQSNNNYTNAQFIYIDAYGIFNDLVTKPASYGLTVTNTGCCGVGRNRGQITCLPLQTPCSNRNQHLFWDAFHPTEIANTIFARRAFNAESPSDAYPFDISRLAQL
40	Sa32F.165	MYSRMLSVFVMLCLLMHIVPRSADCAPEVPCYFIFGDSMFDVGNNNYLLSQAKANYLPYGIDFPKGPTGRFTNGKTIGDFISSYLGFTDFIPPYMAATGRRILKGVNYASGGSGILPESGKTQGDRFSFQRQVFLHKLVATRIAVLLRGRTAALNHLKKCIYTVGLGSNDYVNNYYMPDAYTTSQEFTTEAYAEVLAQEYKRQLSALYEHGARKVAVLGIGHVGYTPVEISRFGADIVTLNAAVDLVNDQLKVLVTAFNANLTDAKFTFLNTTGISAGNFTIADLSKTCCTAIGSTNYTCAPYNTKICADRSEYLFFDNIHPTEVANEAVASRYYSASDSTDAYPYDIKQLASSSLSTFVASF
41	Sa33F.119	MLLESTLSYLQKASKMVLGFSKSSSHFTLKPFHNTLVLSLPTLVFTLLIWRDTFLASAVDIPEDQRFPALLAFGDSIVDPGNNNGLKTLIKANFPPYGQNFKDGPTGRFCNGKVPTDLIAERLQIKELIPAYLDPNLQPEELITGVSFASGASGYDPLTPKIASVISLQQQLSYFEEYISKLKALVGENQTNYILARSLTLVVAGSDDLANTYYISRVRQVQYDIPAYTDLMANKAAEFYENLYKMGTRRIGVFGAPPIGCLPSQRTLAGLFHGRQCIDSYNKAAQLYNSKLQRVIESFNKRNTDATAHVFSIYNPILDLIQNPAKNGFEVIDKGCCGTGDIEVSVLCNGLNPLQTCSDPEKYIFWDSYHPTEAAYRILTDRILKTDISVFY
42	Sa36F.86	MKSTNKSLVMVLMIAALTIGCECKVVQFIFGDSLSDVGNNDKLPKSLAKANVPWYGIDYGNGMPNGRFCNGRTVADIIGDKMGLPRPPAFLDPALDEDTILEKGVNFASGGGGILNETGGYFIQRLSLWKQVELFQGTQELIRRKIGANESEKFFQNAKYVVALGSNDFINNYLVPVYGDSWKYNDQGFIEYLMNTLGQQLKVLHKLGARELMVFGLGPMGCIPLQRVLTSSGECQEKTNKLALGFNAAGKQLLTELSSSLPNASFKFGDAYDVVNDVISNPSKFGFQNSESPCCSFGNIRPALTCVPASTLCKDRSKYVFWDEYHPSDAANEIIAKELIRKFGFKNVNETTQVGQSPAQAPAALAPSPAN
43	Sa39F.196	MRYFQCYIFISMITLFLLSHTLSSAAAPSPKLQTQPFSRILAFGDSFTDTGNTRSSTGPTGFQHVSSPPYGVTFFHKPTNRYSDGRLVIDFVAAYLNLTFIPPYLNKKADKSHGVNFAVAGATASSFEFFKRNNLSLDVTPQSIGTEFIWFSKYLESGGCSGHLTTKDCLSDALFWVGEIGINDYAYNFGSEVSNDLILNLGVQNLFKILKGILSKGAKYIVVQGLPPSGCLPLTLVLAPDTDRDTLGCVRSANNYTFKHNEAIKAKLHDLRIQYPHSVITYADYWNAHHTVMKNPKAYGFNEPLKACCGAGGGPYNYNIFDGCGSTESSMCAKPSEYVNWDGVHLTEAMYKVVFDMFVRGNYTQPSFEYLLNRKTQAHGRG
44	Sa39F.291	MSPAAASFIAVILILASAILRRTNAMQPSTFSQNTTTSVNCTNSTGNPYLAPPTQTLNPPPPLVPAFFVIGDSSVDCGTNNFLGTFARADRPPYGVDFDTHRPTGRFSNGRIPVDYLALRLGLPFIPSYLGETGTLEDMIHGVNYASAGAGIIFSSGSELGQHISLTQQIQQVTDTFQQFILTMGENAAASLISESLFYISIGSNDYIHYYLRNVSNVQSLYLPWSFNKFLATSLKQEIENLYYSNVRKMVLVGLAPLGCAPHYLWQYKSRDGECVESINNMIMEFNYIMRFMVEELITNFPDLKIIFCDAFEGSMDIIKNHERYGFSFTSEACCGLGSYRGWIMCIAPQMACHNASNHIWWDQFHPTDAVNAILSDNIWSGLHTDMCFPTNLQDMVAQ…
45	Sa3F.277	MGSGSGGLVLVVLILICAGLSNAVFGKSYEFPAMFVIGDSLVDNGNNNYLNSFAKSNYYPYGIDYPQGPSGRFNNGKTIVDFLGELIGISSIPAFADPLIRQKGIKRGVNFASAAGGILEESGSNLGEHLSFSTQVTNLKTTISVLQEQMSNAELTRYLAKSLVVVVLGSNDYINNYLVPAMYPPRSSYDPESYADLLIHLYAAQIQEMHDLGLRKFILGGVGPLGCTPHQLAPTPITQPGKCVTKVNDMVKAFNKRLVSLVDNFNANHSNGSVFTYGNVFDAFMGIINDPSKYGFKVSNRGCCGVGKNRGLLTCLPLEMPCKKRDEYVFWDAYHPTQAVNRIYAQRAYTGPTSDCYPVNVKQMAQM
46	Sa3F.554	MLAMRLLKFVSVSIFLSVIISTSNVIEGGVGRSRQKPAVTAVFVFGDSTVDPGNNNFIGTPFTSNFPPYGQDLPNHQPTGRFSNGRLVSDFMSEYAGLKDLIPPYLDPNVSLEEMMTGVSFASGGSGFDPLTPKISGALTMEEQLDNFREFKSKLVEKIGQKETEELIRKALYVISAGTNDFVINYITIKVRGLRYTVTEYEKVIVKYVHDFTQELIREGAKKMSIGSLAPIGCLPVVITLYSKSKLLNRGCIDSYSAISRSFNKFLATELDKMGAEMAVHGVKILYADVYNPVVYMIQQHEKFGIEDVNRGCCGTGYLEVTLGCNSLSWVCPDASKYVFFDSIHPTEKTYYYVFQTIRPNLDYLFKD
47	Sa42F.134	MAMRMRVSVMVILRIFGALLVEVMSAAAAAEAPKPVTFVFGDSLTEVGNNNFLQYSLAKSNFPWYGIDYTGGKATGRFTNGRTIGDIISEKLGIAPPPAYLSLSLYDDAVLKGVNYASGGAGILNDTGLYFVQRMSFDDQIKNFAKTKVTIKAKIGENETSALLNNAIYFIGMGSNDYVNNFLQPFLADGQQYTHDEFVELLMTTLEQQLVELHQLGARKIVFHGLGPLGCIPSQRVKSKTGQCLKQVNRWVMIFNSKVQKLTAKLNKWLPNAQLVFADTYPAVYDLISNPTAYGFKISNTSCCNVDTTVGGLCLPNSKLCKNRKDYVFWDAFHPSDAANVVLANKLFESIFAATAGAEGPAPAPSPK
48	Sa45F.55	MAVGMSSVLLFMFMLMPLISTCLNVTQLRQIVAKNRVKCILVLGDSTVDPGNNNWLDTMTKSNFLPYGKNFMSGFPTGRFCNGRLATDFIAEAFGFKSSIPPFLDPALKKADLLTGVSFASAGSGYDDLTANLSSVLTLSTQLHYFQHYKYQLRRTVGNSDEAEQIINRAIFLLSIGSNDFVMNYYLVPIRSKQFTIDQYLNFLISNMVRTVKRLRRLGARKLLIVGLPPLGCLPIVKTLRHVPRGCFAELNEITASFNDMIKNTVLNLHLQMKIAYVDVYDCILTSIKNPKSFGFIETSRGCCGTGRTEVGQTCKGLASCKEPGKYVFWDAVHPTEKMYKICSDKILSNISRRFLS
49	Sa46F.118	MNVFLFFLYIHETCLSLFLTLILVRNVRAQNVSTLVPAIITFGDSLVDIGNNNYLPTLFKANYLPYGRDFISHRPSGRFCNGKLAIDFAADFLGFKIYAPAYNTRREFRRNIRLGANFASAGSGYDDTTSHIAGAIPLSRQLHYFKKYQNRLVNTTGREEAKVIVRDALYVVSSGSSDFILNYYANPFINKVYSPGEYSSMLIRTFKRFIKDLYRRGARRIGVTSLPPLGCLPAVKTLYRHHENGRCVTRINEDVLDFNEKMNKAATHLQDKLPELKIIVFNIFTPFYDLVLSPINYGTSSSSMPLIYVRAQRRCFEGFEEAERGCCGTGTIETTSFLCNIRSIGTCTNATRYVFWDSLHPSEAANRILARALISQGISLL
50	Sa46F.20	MSPITLLMIVFISISISMLISLTKVEALTKRNPSVPAVFVFGDSTVDPGNNNFIGTTFRSDFPPYGQDLPDHMPTGRFSDGRLVTDFVASYAGVKDFIPPYLNPELSLDELMTGVSFASAGSGFDPLTPQISSTLSLPEQLEYFREYKTRMTQKIGKKKTDELISKSVYVLSAGTNDFVVNYITLPLRRQSYSVSQFENFILQYLRQFIKALMIEGARKMAIGGLPPIGCLPIVITLYSKSNPLQRGCIDSYSAIARSYNKLLTKELTNMATQVSNHGIKLVYADIYNPVITMIQQHDRFGFEKVTSGCCGTGYLEASFLCNYKSWVCNNASKYVFFDSIHPTERTYYNVFMSLRPIIDYILKD
51	Sa46F.270	MTLGLLIEVIGAARSGDRGCNIPAIYNFGDSNSDTGGTSAAFFPRAWPSGETYFKEPAGRTCNGRLIIDFIAEKLKVPYLDAYLDSVATSFRRGANFATGGSTIRQQNESFLYSSPFSLDVQFAQFSNFKARTTGFYNHTTKFKKPVTREELPNPKDFAAALYTVDIGQNDLAAGFRKLSDQQLLAAIPDILTVFALQIQNLYNLTGARTFWIHNTGPIGCLPLTLINLPSTLSPGTLDEHGCLKFQNDMAREFNKQLKETVARLRTQLPIAAITYVDVYTAKLDLIANFSKHGFEDARKICCGYFRNGSLIVGCGRQLLVNGTMLFGGSCEDPSSHIFWDGVHYTEAANRWIADKIINGSLSDPPIPITRACRSN
52	Sa46F.31	MVSGLVFVLRVVLITLGFGVVFADPQVPGYFIFGDSLVDNGNNNNIASLAMANYLPYGIDFPRGPTGRFCNGKTTVDVLAELLGFSDYIPPFARARGRTVLQGVNYASAAAGIRQETGLQLGQRTPFSGQVRNFRTTVSQIAYILGSTKAATDHISRCIISIGLGSNDYLNNYFMPLFYSSSRRYTPEQWADLLIREYSQNLRNVYEYGARKFVLIGVGEIGCSPSILAQRSPDGRTCSAEVNNANKIFNTKLKSLVDEFNNNYNNAKFIYIDAYGIFDDLRTKPGSYGLRVTNAGCCGVGRNNGQITCLPYQRPCSNRREYLFWDAFHPTEVANTVVARRSYSAQKSSDAYPFDIRRLVQH
53	Sa47F.286	MGALRMMIYGFFILCVNFVSDSVELGCDFPAVYNFGDSNSDTGAVSAAFWPIPAPNGMNFFKKPSGRDSDGRLVIDFIAERLELPYLSAYLNSIGSDYRHGANFATGGSTIQMPNETIYEHSISPFYLGMQVSHYEQFKDRTVEIYNQAKSEFDRSKLPIPEDFPKALYTFDIGQNDLSMGFRRKSMDELKQSLPEIISQFSSAVTRLYKNGARYFWVHNTGPVGCMPISVIYKTHPEPDFLDEFGCAHQQNEISTEFNRLLKIGVVKLRTELPEAAITYVDMHAAKLGLIKDAQNQGFTDPFKPCCGNYTNGANVWCGNKGYINNTEVIGGSCSNPDKVISWDGVHYSQAANQWFSNHILNGSLSDPPLPITQACFKN
54	Sa55F.146	MAAHRSFLVQLLLLFCRISGSLNAQQKQSYSKTCRFPAIFNFGDSNSDTGGISAVFYPIVMPYGQTFFGKAVGRASDGRLMVDFFANGLGLPYLSAYLNSVGADYHHGADFATGSSTIMMPTQTFFQGGRSPFNLQIQIAQFVQFKARMVFFFFADNVKSSRVPKPETFQTAIYTIDIGQNDIADALYKMTHEQALAAIPAMIEQVATAIRILHYQGGKAFWVHNTGPIGCLPFTLTYVSKYPQPGYLDEIGCIKDQNQVAQEFNRQLKEKIVSLRLEMSDAVFTYVDVYAAKYGLISDAANQGFGPPAGICCGYFKDGVRIRCANREVVNGTEMFGESCSNPSSFISWDGVHYTEAANYWLATRIMSGAYSDPPVPMNQACHEQQKG
55	Sa56F.143	MVIIINQMSCIKLMFIYMFLLISRTNVEAMDTNGKPAVPAVFVFGDSTVDPGNNNFIGTAFRSDFRPYGQDLPTHKPTGRFSNARLVTDFIAAYAGVKDFIPPYLDPKLTLDDLMTGVSFASAGSGYDPLTPKISRTLSLPEQLGYFREYKARLAQKIGKTRTDEIVSKSLFVISAGTNDFVVNYITLPVRRRSYTISEFEMFILQNIHQFTQDLLTEGAKKICLGGLPPIGCLPIVITLYSKSNPLQRGCVDSYSAIARSYNKLLATELTKVASEAANHGVKIAYADIYTPVNAMIQQHDNFGFEKVTSGCCGTGYLEAAFLCNARSWVCKDASKYVFFDSIHPTEKTYYNLFVALRPILDYLFKD
56	Sa57F.156	MQSNQQTFVLQSAMSPPKVLLILLAFVIAALQGYVRVTEARAFFVFGDSLVDNGNNNYLPTSARADSPPYGIDYPTRRATGRFSNGLNIPDLISEALGSETTLPILSPELIGEKLLVGANFASAGVGILNDTGIQFVGILRPVRQLQLFEEYQERLAALVGPDETTRIVNQALVLITLGGNDFVNNYFLVPYSFRSQQYSLPTYCKFLIKEYRKILMRLYELGARRVFVTGTGPLGCVPEERATRSLNGDCAPEVQRAAEIFNPLLVQMIQGLNNELGSNIFIAANTGRSSKDLITDPEAFGFATAQVACCGQGRFNGIGLCTVASNLCPDRDVYVFWDAFHPTERAARYIVQNILRGNTDYMNPMNLSTILAMDSRV
57	Sa5F.25	MANQYIPWLFILFWTMLLVTESAAAKVPAIIVFGDSTMDAGNNNQISTIARSDFQPYGRDYSDGKPTGRFSNGRIPSDFISEAFGLKPAIPAYLDPAYKISDFAVGVTFASAGSGYDNATSDVLSVIPVWRQVEYFKEYKTKLAAYLGPNKARETISEALYLTSMGTNDFLENYYTMPQRRSQYSIQQYQNFLVGLAENLLRKLYGLGARKISLGGLPPMGCLPLERATNFLAGSSCNDGYNKVSSEFNGKLQSMSAKLNSQLPGIRITNSNPYNILMEFVQKPASYGFQVASMGCCATGTFEMGYICDRFNMFTCTDANKYVFWDAFHPTEKANKLIADRLVKTALAQFL
58	Sa5F.658	MEMSLAFLALLISFSFQLIINPASIVEARAFFVFGDSLVDSGNNDFLATTARADSPPYGIDFPSHRPTGRFSNGLAIGSEPTSPYLSPALKGERLLIGANFASAGVGILNDTGFQFVNIIHIYKQLKFFHEYQWRLSKHIGKEKTKQLVNSALVLITLGGNDFVNNYYLVPFSLRSRQFRLPDYVTYLISEYRKVLQRLYDLGARRVLVTGTGPMGCVPAELAQHSVNGECWPQLQLAASLFNSQLVQMLRSLNTDLGSDIFIAANVNDMHMDFVSNPRAYGFVTSKLACCGQGPYNGLGLCTPASRLCANRDSYVFWDNFHPSERANKIIVQRILTGSSKYMKPMNLSTVMAIDDSSAKVN
59	Sa64F.90	MEVSNPDDDFRTFVVVLVLCTCALVSEAKIVLPGNETIPALLIFGDSIVDTGNNNDLKSVIKANFPPYGRDFNGGVPTGRFCNGRVPSDMIASELGIKDTVPAYLDPNLKSNDLLTGVSFASGGAGYDPLTATLVSVISLSQQLEYFKDYRTKLKTLVGENQTSFIVSKSLYLVVAGSDDIANTYFISRIRQFQYDVPTYTSFLADQASDFLKKLYDLGARRIGVFNAPPLGCLPSQRTLAGGLSRHCVEDYNKAAKSYNSKLSSKINSLNKQLPHVKIVYIDIYTPLLDLIINPKKYGFEVADQGCCGTGKIEVVVLCNQFSPFTCSDASRYVFWDSYHPTERAYGTLLPTLVRKYVDDFFCGDKLC
60	Sa66F.83	MSIKLSSLTCILYNIIVLLLTSSLINVSKPCNGESVAFFIFGDSTVDSGNNNYINTTPENRADYKPYGQNGLSDEPTGRFTNGRIFVDFIAENAKLPLIPPFMDPSAEYTNGVNFASGGAGVLPETSQGKVIDLPTQLKNFEVVRKTLAETYGDVKAKNIISDAVYFISVGSNDYLRGYLASPETQKHYKPHEYVGMVIGNLTHSIQVLHKKGARKFGFLTITPLGCLPALRAANPEPNPNGACFQQANMLARAHNHGLSVILQNLQAVLEGFKYSNTEFYDWFQDRLENPSKYGFKDGVNACCGTGLYGGTDTCGGIKAVKHYDLCERPEDYVWWDYVHATEKIHEQVAKDLWDGPASFVSPYNLKNLFVNKELTMTIADIVDIDDANLHMFQQ
61	Sa6F.163.1	MEFQLKLFAVMVLSSVLVLAFLLTEAEGGRAFFVFGDSLVDSGNNDFLATTARADAYPYGIDSPSHTPSGRFSNGYNLPDLISQEIGGEESPLPYLSPQLDGERLLNGANFASAGIGILNDTGVQFVSILNFNWIRYSFLPENIRNRFLFVSMQVNIIHIMQQIAYFEQYKQRVSSLIGEPQTKQLVNQALFLITLGGNDFVNNYFLIPYSARSRQYALQDYVPYIISEYRKILSRLVELGARKVLVTGTGPIGCVPSELAQHSTNGECVPQLQQAASLFNPQLGQLINQLNSELGQTVFIAGNINEMHFDLIQNPQQYGFVTSKIACCGQGPYNGIGLCTPASNLCPNRDLYVFWDGFHPCERANKILVQMIMNGAEKYMSPMNLSTVMKLEDFTTV
62	Sa6F.233	MPSSRNLHHHLVLTTLFISISSSAATTPCTKPPIIFNFGDSNSDTGGLVAGLGFPVLPPNGRTYFQKSTGRLSDGRLVIDFLCQSVKARFLSPYLDSLGSTFTNGANFAIVGSSTLPKYVPFALAVQVMQFLHFKARSLELKSSGYKDVIDNRGFQDALYIIDIGQNDLADSFAKNLTYAEVVAKIPSVIAEIKLAIEAVYRQGGRKFWIHNTGPLGCIPQKLWLLQSKDLDSNGCITSYNEAAKKFNSELKRLSQDIKSELKDTSIVYVDIYSIKYDLIANATIHGFSNPLMACCGYGGPPYNYNINITCGRTGYKVCDEKSRYVSWDGIHYTEAANSFIASRILSTSYSTPSVGFNSFCQ
63	Sa72F.20	MASKSVSLALFALVLLHISSVKAGSQLPLFPAILIFGDSTVDAGNNNYIPTLFKGNHPPYGRDYPGGIATGRFSNGKLTTDVLASLLNIKSAVPPFLDPHLSDADIKTGVSFASGGAGYDDTTNFASAIPITHQIPSFIRYIDRLRGIVGLTEAAGIIKNAFVVLSCGANDMAFNFYGNPVRSVRMTVDDYQYFLLGKMNYTVQALYNLGVRNMIITGLPPVGCLPIMMTMKRHNLLNPVCVSEQNADSVIYNKKALKLFTTMEKLYPGLKIGYANIHDPLLEMIEQPQKYGFDVTHVGCCGTAGKVAAGPLCNVLSPSCVNSSNHVFWDSIHPSQAAYSYIANYLFRYVVPRFM
64	Sa79F.141	MEYFHISLSSSSPPPPPPPRNTISKERTCCLLVCFSFLLWCNVGVQSVVDIPESQRFPALLVFGDSIVDPGNNNNMATPSRADYPPYGQDFQGGKVTGRFSNGKLATDFIAQELSIKEILPAYLDDELKSTDLLTGVSFASGGCGYDPISSVAAVARTLDEQLDQFKEYKSKLNSMVGENETLRILSRGLVLVVAGSNDIANTYFGPSTASVIRRSQYDINAYTDFLSTSARKFITGLYEVGARRISLLSAPPLGCVPSQRTVAGGIERACVEEFNQASLVLNSKLSSMAKSFSKEHTDARAVVIDIYYPFLELIQYPHRYGFEVVDRGCCGTGTIEVTILCSEYVHVKTCSDPTKYVFWDSFHPTETAYKIVVSKILEPAIPKLYL
65	Sa79F.142	MESRASTFKRTLITSISSKIWLVIFCSGLLLYCCPHVQAEFKLLKGIKFSTLLVFGDSIVDPGNNNDVQTPSRANYPPYGTDFIGGVPTGRFCDGMVPSDFIAQALSIKQLLPAYLDPNLQPSDLPTGVSFASGGCGYDPISSVFGVARTLYEQLDHFKEYKTKLTSLVGENASSAIISNSLFLVVASSNDIANTYFGVYARTPPYNDIESYTSFIANSAGDFVTELYKEGARWIGLFSAPPLGCLPSQRTLAGGVERKCVESHNQAAVLFNSKLSSVVDSFTKKNTDVQAVVIDIYNPLLELIQNPIQNGFEVADKGCCGTGNIEVTFLCSKYTLQPVKICKDPTKYIFWDSFHPTQATYKLLAAKICAEYF
66	Sa79F.143	MVFRSSKSSSHFTLKPRHNTLSFLPSLIFSLLIWSGVFFASSALDIPEDRKFPALIAFGDSIVDPGNNNGLRTLIKANFPPYGQDFKEGPTGRFCNGKVPSDLIAERLQIKELIPAYLDPNLPPDELITGVSFASGASGYDPLTPKIASVISMTQQLTYFQEYISKLKALVGENQTSYILGRSLFLVVAGSDDLANTYFLARARRAYDVPAYTDLMANEAAIFYENLYKMGARRIGVFGTPPIGCLPSQRTLAGAFHGRPCIERFNKAAQLYNSKLQRVIDSFNKRNTDAISHVFPIYNPILELIQHPAKNGFEVINKGCCGTGDIEVSVLCNGLNPLQTCADPTKYIFWDSYHPTEAAYKLLVDRILEKEISVFL
67	Sa7F.179	MSNFLSFLTILISMINLVPKIALSQPQVPCYFIFGDSLADPGNNNLLITQAKANYPPYGIDFPNAKATGRFCNGRTVVDFITQQLGFVDLIPDFISATGSKMLRGVNYASGAAGISNESGRNQGDRLTLTEQVQLHKITVGRFTILLKNRTAAMNYLNKCIYTLGFGSNDYINNYFMPDMYTTSQQFTPSQFAKLIANKYAVQLNKLYENGARKVALLGVGPIGFTPYELGRYGPAGAPTLNAAVELFNEELKTLVDSLNTNLTDARFTFLNTTGISSGGNVTLSQLVPCCRIQANNFTCVPFTNNICPNRQLSIFFDNVHPTEVANQPVANRYYTAQNPTDKHPFDIQELTQLLI
68	Sa7F.184	MVTMGQFKIVLMMIILLISMTSVDVTKGVGSRRIKPAVPAIFVFGDSTVDPGNNNFIGTPFTSDFPPYGQDFPNHQPTGRFTNGRLVPDFIAEYLGVKDLVPPYLDSSLSLNDLMTGVSFASGGSGFDPLTPKISGALSMQEQLDNFKEYKSRVVGQIGMKQTEELISKSLYLISAGTNDFVVNYITLKVRRLSYNVTEFQNLIVQYVHQFTQGLLREGAKFVGIAGLPPMGCLPLVITLYSKSGPLHRGCIDSYSDIARSYNKLLLTELQKLEAEGGDDNGVNIMYADIYNPVNVLIQQHDKFGIENVDRGCCGTGLLEVTLACNSKSWVCPDASKYVFFDSIHPTEKVYYHVFQTLQQQLDDVFRY
69	Sa7F.458	MPPPISSTAAILYLIILSSPGGNGRSVAEARRRHMQPRILGRDLYGFRPTKMFVFGDSYADTGNNRKTLANSWKAPYGVTFPGNPAGRYSDGRVLTDYIARFVGIKSPIPYRWMNVGPKRIQYGVNFAYGGTGVFQTSIPEPNMTTQIDFMQQLLNQGLYNWNDLQSSVALVTLSGNDYGYFISKTSSFQALQAFIPTVVNQLVMNIQRILNMGVKKVVVTSLQPLGCLPQMTIETLYQSCNETQNAAVQFHNLLLQKALGMLNNGKQGSAPPFVVLDLYGSFMSVLQNNSTQQESVKFKNPLKLCCAGTTSDSYCGATGADGVKMYTVCDEPQSSFFWDTVHPTQEGWRAVYIALQDTLKQNLFLS
70	Sa7F.504	MNARVVLLLLLHSLTLIGRSSCRSGRIKYCNFQAIFNFGDSNSDTGGRSAALMEISSPNGETYFHYPSGRGCDGRLIIDFIAEELKLPHLDAYLDSLGTSFRHGANFATGGSSVRPGGYSPFHLGIQINQFLRFKSYVTRIHNHLNHTGLKKGRHIAKDLPRMKDFSTGLYTFDIGQNDLAYGFEHTNETLVLKSMSKILHQYTQAILDLYKEGAKYIWIHSTGPIGCLPYSVIFDQHKPGNLDEYGCVGTQNNVAKEFNRRLKLKLSQISAKLPRIVFTYVDVYTAKYSLIKQAKKLGFSDAMKFCCGSYYGNRLNCGERKMINGTVHGALCKDPSKMISWDGIHYSESANLIIANRIINGSLSDPTRPVSQACRKDLR
71	Sa81F.175	MFGFVYGVFLCLMLLSATACSQRPRTTQAQVPAFFIFGDSLVDNGNNNNMLTLARANYRPYGLDFPRGTTGRFTNGLTYVDALGQLLGFREFIPPYARARGRGLIRGANYASGASGIRDETGNNLGQHNSMNQQVENFRDTVSDLRRFFRGDNTSLNLYLSKSILYCGLGSNDYLNNYFMTDFYATSTQFTPKAYAASLLQDYARQLTDLYELGARKVIVTAVGQIGCIPYQLARYNGNDTRCNEKINSVVTLFNNGLKGLVQRFNRGTLPGAKFVFLDSYESTKELVTNAASYGFEVVDKGCCGVGRNNGQITCLPLQTPCGDRRKYLFWDAFHPTEVANSILAKNSFSSKTVSFSYPINIQQLAEL
72	Sa82F.57	MAAMHVLAVVVFCLTSAVTLAVPQVPCYFVFGDSLADPGNNNNLKTIAKANYAPYGVDFPGGPNPTGRFTNGRTYADFITQSLGFTSFVPPITYAAVGNFIGVNYASGAAGILDETGKTNGDRISLGKQLVAHQRIVNQLPGQLKITKKDVTSLLNKCIYTIGIGSNDYVNNYFVPQSYESSAEYTPEAFAQLLVTEHNRLVKSLYDLGARKIAFVGVGHIGFTPYEFNLQWPGVQNATTLNNAVDLFNGALKASVDTLAKDLPEAKLTYLNTVGISSDGPAVPASAIRSCCQHIDTVSQITCKSGDSAVCLDRSKALFFDNIHTTEVVNQAMAARYYTAKNPSDASPYDIQKLASL
73	Sa84F.200	MASRGLMAWLLLVVPAVLLSDLSECKCDFEAIFNFGDSNTDTGGFWAAFPAQGGPYGMTYFQKPAGRATDGRVITDFLAQAIGIPYVSPYLQSIGSDFRHGANFATLASTVLEPQTSLFVTGISPFSLGVQLRQLKAFKAKVDEQSSSGSNLPPSDVFGKSLYTFYIGQNDFTSQLKDLGLGGVQQTMPQVASQISNTIKEIYGIGGRTFLVQNMAPVGCYPMFIVQLPHQSSDLDEYGCLKAINDGVSWYNNLLKDTLAQTRNELHDASVVVVDTYSLYLELYRNPKGHGLQYGPKACCGYGGGEYNFNQQVFCGNTKTIDGQTATASACGDPYNYVNWDGIHGTEAANKLVAQAIISGSSFDPNFPLNQRCDLQPLS
74	Sa86F.120	MTLGLLIEVIGAARSGDRGCNIPAIYNFGDSNSDTGGTSAAFFPRAWPSGETYFQEPAGRTCNGRLIIDFIAEKLKVPYLDAYLDSVATSFRRGANFATGGSTIRQQNESFLYSSPFSLDVQFAQFSNFKARTTGFYNHKLPNPKDFAAALYTVDIGQNDLAAGFRKLSDQQLLAAIPDILTVFALQIQNLYNLTGARTFWIHNTGPIGCLPLTLINLPSTLSPGTLDEHGCLKFQNDMAREFNKQLKETVARLRTQLPIAAITYVDVYTAKLDLIANFSKHGFEDARKICCGYFRNGSLIVGCGRQLLVNGTMLFGGSCEDPSSHIFWDGVHYTEAANRWIADKIINGSLSDPPIPITRACRSN
75	Sa92F.24	MLHVLSQLRAKMASDILYRLHTPVAIFMLLIFTNAAIRNTHNNRSKLRAAFVFGDSTVDSGNNNFLLTDFRSNFPPYGHDFAGSEPTGRFTDGRLVTDFIASYVGIKDYIPPYLDPTLDVEDLKTGVCFASAATGFDPLTAKLSNVLSIPSQLENFREYRKKMEKVIGKTEMDEIIDRSGVIISAGTNDLSVNYFLLPVRRKRFTVTEYQQYLLGNLKQLLQELMKDGIKTFGVVGLPPIGCLPFVITLYSKDESGARMCIESLSSVARSYNEMVKNELSSEFYKSNGVKVVYADIYTPLDGIVRNPRKFGFEEVYEGCCGTGVLETSFVCNPTSYLCSNVSEYVFFDAVHPTEKTYSILFEYVKPVLDEALNGL
76	Sa95F.131	MQHFSSKVSCLVLTFSITLVVVMLDQNNVHHVEARAYFVFGDSLVDNGNNNFLLTSARADSPPYGIDSPSGRPSGRFSNSRNLADLVGERIGVAEVLPYLNPQLDGERLLEGANFASAGVGILNDTGIQFVNIIRIVRQLQYFEQYQSRVGALIGEDQTRQLVNDAMVLITLGGNDFVNNYFLIPFSARSRQYRLPDYVRYLIQEYRKILLILYELGARRVIVTGTGPIGCVPAEIAQRGRNGECAVELQQAAGLFNPQLVQIIQELNSELGSDVFISANAFEMSYTFITNPAAFGFVTSKVACCGQGPFNGIGLCTVISNLCPNRDLYAFWDAFHPSDRANQFIVEQFMIGSNKVMNPMNLSTMLTLDSRT
77	Sa99F.11	MAKSVFIHVFMCMFLSLIVFVSHVALAPVPRVPCYFAFGDSLADPGNNNNLQTTAKVNYPPYGIDFPGGATGQSLGFTAFLPQIAGAGGGNFIGVNYASGAAGILDGTGKASGDRISLRKQLIAHQMLIDQLPTILKTTMKNVTTILNKCIYTIGIGSNDYINNYFMPQFYNSSANYSPFAFAKLLINEHNRIVKGLYDLGAKKIAFIGVAHIGFTPYEFNFQWPGVTNATMLDHAIDLFNFELKASVNTLAKDVPEAKLTYLNSVGIASGAPAVSPEALKPCCQNIDNRSVPTEQKHYFFDNIHPTEIVHQAVAARYYSAQDPSDAYPYDIQKLAALELDKEHIFMERTSNESLLKSKLDIKWNFNDNI
78	Sa9F.272	MSTHNQTSLQLLTLLILLSFFLQPTSAHKKNKTSGGGGAGGAGGSGEVQVGMSLQGSFSQVIAFGDSYTDTGNCMFMNGLRRFFGGIIANSPYGSIFKSPKNGNRFCDGRLVIDFLCEELGLPHLPPYKDPKVNVSGGVNFAVSGSTSLTSDLFSKYRIGQGLLWKSMVSQNFLTQLDWFDEFIHKMAASGGYGGGAGGGFGGGGASGGFGGGGGGSGSGQVGGGASGSGGASGGVGGSNGGQIGGSGRGGGGASGSGQIGGGGASGSGQIGGGGSGQAGGGASGNGQLGGGAGGQAGGGASGSGQIGGSGGGQAGGGASGSGQIVGGGGGKAGGGASGSGQIGGSGGGQAGGGASGSGQIGGSAGGGASGQIGGSGGGQAGGSASGRGQIGGGGSASG…
79	Sa9F.31	MALISSTYQFMATFTIITVHLLVYMQLGYSQGVAAFTSFIFGDSLVDVGNNDYLFTLSKADSPPYGIDFAPSGRNPTGRFTNGRTVNDIIDETLGASSFSKPYLDPDSNQDDAIIRGLNYASGSSGILDETGTLFIGRIPLSKQVSNFEQTKTQLVNLIGRQKADELIKNAMFSITTGSNDILNYIQPKSLTSFWYSNSDVSPSMLQRYLISNITMQLKRLQDLGARKILVVGVGPLGCIPIVRALNFVPLGKCSEEVNKFVQSFNSKLRRILEHLNRKTYHPRRSVFAFANTYETVTRIIQNPAQYGFENAYDPCCGGHFPPFICYGGAKANANSTSTGLCPDRSKFVFWDAYHPTEAVNILIAKELLDGDRNVVSPMNVRGLHNY
80	Sa9F.81	MSSFSHPSLQLLAILILFLYLLQPALAHDKPKQTSTSTGGGGSVSGSGDISVKVSLQGSFSQVFAFGDSYTDTGNCIFLSGVKKLLGGKLPLSPYGPLFKSPLSGNRFCNGRLVVDFLCDALGLPPLPPFKDPKVNVSFGVNFAVSGSTSLTSDMFSKYKIGQGLLWKTMVPQNFLTQLDWFDEFLEKMAAGGQGCVAGQIGGSFSGGGSFGGGGSGGDGNIAGGASGSGSFGGSIGGGSSGGGSIGGGSSGGGSIGGGSSGGRSIGGSASGSGQASGSGQASSSSSGTGQVSGSVSGTASGSASIDFSNVLFWIGEMGVNDYARIISTTNLSGNWLSQLCVNHVMKVLKGVLDKGAKYIVVQGLPPIGCLPLPLAFTPDFVQDKNGCSETINALVRFH…
Pseudoenzymes amino acid sequences
1	Sa00F.1249	MILSALLTSVGINLGLCFLFFTLYSILRKQPNNVKVYAPRLVAEGKAQERGHFNLERLVPSAGWVTTAWRTTEEEMLVEIRPRCCCVNENFYLQEYGYISRKRIDYFYSNKPQPHHFTILVRGIPKSSTGSYSDSVESFFTEYHPSTYLSHSLVRRNSKLQSIMNDAEELCKKLAKIKANSDGREKYKRTGFLGLWGDRVNELDYYGKKLEELECTARKEQTSLKEKAAAFVCFKSRYGAATAVHIQQGVNPTEWTTEKAPEPEDIHWPFFSASFFKRWILKLVVIVACIVLTLLFLIPVLLVQGLTHLDQLEKWFPFLKNVLKIAVVSQVITGYLPSLILQTFLSYVPPIMILLSALQGYISNSQIEKSACAKMLWFTVWNIFFANVLSGSVLTMADI…
2	Sa15F.348	MNIAALLTSAGINIGMCALLISMYSILRKQPTNFDVYFTRRLAQVQGERQDSLCFERFVPSASWLVKAWETTEDELLADAGLDALVFIRIIVFSIRIFAIAAVVGIFMVLPLNYYGQEMQHKEIPFESLGVFTISNVKEGSQWFWAHVIALYIITGSACMLLYFEYKSLTSLRLRHITQSPTNPSRFAVLVRSIPWSAKESYSDSVRNYFTKYYASSYLSHQMVHLCGTVRKLVSSATKIYKVIISTSIEQGCKPSLRCGLCGTTTSSFKILSSEESTKATNGFKSIESRGSKENECSAAFVFFRNRYSAYIASKVLQSTNPMLWVTDLAPEPQDVYWSNLCIPYRQLWFRRIATLLATAIFMFVFLGPVAFVQGLTELDHLTRMFPFLRGLLKKPYIN…
3	Sa19F.282	MASTLIQFPSLHFTPTTATTAGLATVIGALFFIVFRNLLHKRNLKSPPAVPGLPLIGNLLQLKEKKPYKTFSKLAEIYGPIYRIRLGSSSVVVLNSVDVAKEAMVTRFASISTRKLSHALKLLTYNKNMVAISDYDDFHKTIKRHILSNVLGANAQKRHRLHRDTMIENMVKRLHAHVKTHPLKAVNFRNIFQSELFRLSMKQALGRNVESIYVEELNATLSEEELCKVLVLDIMEGAIEVDWRDFFPYLKWIPNKSFDSRIERLCFRRKVVMKALVNEQKKRIASGEDVNCYIDHLLREATFLSDEQLCMLLWEVIIESSDTTLVTSEWAMYELSKDFTRQSKLRMEIKYACGSSNITEENLSQLPYLSAVFHETVRKHSPAPIVPLRYVHEDTEIGG…
4	Sa28F.160	MTQVVEGYLPSVVLMLFLYAAPPLMMLFSAVEGSISRIGRKKSASCKVLFFTIWNVFFVNIFSGTIMKQLDKLSYLKNVPILLGQAVPSQAILFMTYIMTSGWASLSVELLQPFMLLANLFSRYILKKETPPQGMLSFPYHTEVPRVLLFGLIGITCSVLAPLITPFLLVYYILAYLVYRNQFLNVYMDKYESGGQFWPIAHNSTIFSLILAQIIAIGVFGLKKAPVASGFTIPLVIFTLLFNEYCRQRFSPVFKKNPAKVLMDMDFEDEQNGRMEEIHKQLPVAYCQFTVTSQDFCRSGHTLLHEAEKIEKDSQNIALKNVPSILVRHSFEEDQHQLQPELNVQEEDANKLQVVLQST
5	Sa28F.161	MNIAALSTSAGINIALCVVFFSLYSILRKQPGNASVFFARWIGQRLRPCENTVERFVPSASWILKAWQTTEQQLLDSAGVDAVVFIKIVVFSFQIFTVAAVSCFIMVLPSNYYGRLMQHAEVHSEELEVFTIVNVQKESRWFWTHVLALYIISCSACTLLYFNYRNITKLRLAYISRATPNLSHFTVFVRSIPSVSPDSYSDSVKKFFSKYYASSYLSHQMVHRCGKIYKLMTNAEKMYKMLKSTNDENHGQPCYLRCGLCGEMTNTFKILSGDDAVKTSDEVHNLELTKDQKEYPAAFVFFKTRYAAFTASQALQSSNPMLWVTELAPDPLDVYWSNLWIPYRQLWVRKIATRTSAIALMLLFLVLSRLYKLLLTPGV
6	Sa28F.215	MLVSALFTSLAINSCLCIVFFTLYSVLRKQPSHYAVYIPRLVSEGKHKFVRHFRLTKYLPSPSWVKKAWELSEDELLLLSGLDAVVFMRMLIFSFKVFSVTGAIGIFLLMPVNCFGTQLEHFDLYNLSNNSLDLFSISNVNNGSHSLWIHFGAVYIVTLWVCYLLYLEYGYIAAKRIDYFHSSRPQANHFTVLIHSIPVSHGSGISNSIERFFREFYPSTYLSHVVIRRTNRIRTLVTNARTLYKRVMDMRRIRKASHNRKEGCFGMFRRKVDGVVHIEKKLKDIAEYVKMEQSGILSAGEETRAAFVSFTSRYAAATAYHMRLSVNPTHWVTERAPEPHDVYWPFFSSSFIKRWMCRLAVIVGCTLFTLIFLIPVVLVQGLTNLRQLEEWFPFLTIIF…
7	Sa28F.72	MNIVGLLTSAGINIGVCVICFSLYSILRKQPGIVGVYFAGRVTQAQKQLRDSEDSIERFVPSASWIWKAWETSEDELLAYAGLDAVVFIKIVVFSIQVFSIAAFVCLLMVLPSNYITRKHVALSSEELENFTIVNVPEDSRWLWTHVVALYIISISSCILLYFNYKTITDLRVSYISKVPANLSQFTVFVRAIPLSSQGSYSNSVKNFFTKNYASSYLSHQMVHPSGLVNKLMTDAEKMYNVLKSTTNESPGRPIFVRCELCGEMTSSYRILSNEDSVKTNNEVEKLELSSKQKEYPAAFVFFKTRHGAYTASRALQSSNPMYWVTYLAPEPSDVYWTNLCTPYKQLWIRRIVVLIAAAACMLLFVFPVALVQTLTDAARLSRGSPFLRKILEWKFMTQ…
8	Sa33F.10	MLVSALFTSVAINTCLCILFFVLYSVLRKQPSNFGLYTPRFVSERTHKLGRHFRITRYLPSSSWVRKAWELSEDELLLSCGLDAVVFIRMLIFSLRVFSVTGAIGIFFLLPVNCLGTQLEHFDITNLSNISLDFFSIANVNNGSKSLWIHFVAVYVVTFWVCYQLFHEFRYISAKRIDYFHCSRPQPHHFTILIHSIPVSNGSSISASIEAFFHEYYPSTYLSHVVIRRTNRLRTLAASARSLYTRTMEMSWKQIAFRTIPDGCLGVFQRKVDSVVHIEKKLTDIAESVKVEQCGIQSEGEETKAAFVSFTSRHAAATAYHMQLSVNPTHWITERAPEPHDVYWPFFSSSFIKKWISKLAVVLGCTLFTLIFLIPVVVVQGLTNLNQLEEWFPFLTIIF…
9	Sa33F.138	MNLVGLMTSAGINIGVCVICFSLYSILRKQPGIVGVYFAGRVTQAQKQLRDSEHSIERFVPSASWIWKAWETSDEELLAYAGLDAVVFIKMVVFSIQIFSIAAFVCLLMVLPSNYVRKEHGAISSEELESFTIVNIQEGSRWFWTHVVALYIISISACFLLYFNYKRITDLRLSYISQVPAKLSQFTVFVRAIPLSIEGSYSNSVKNFFTKNYASSYLSHQMVHPSGIVNKLMTDAEKMYKVLKSTTIESPSRPIFVRCELCGEMTSSFRIASSEDSDKTNGEVQNLESSSKQKEYPAAFVFFKTRHGAYTASRALQSSNPMYWATYMAPQPCDVYWTNLCIRYQQLWIRRIATLITSIAFMLLFIFPVALVQTLTDAARLSRNSPFFKKILEWKFMTQ…
10	Sa55F.257	MESVSLVVDKVKGALNSTRDLIADAYQRQSKEMSRRNPIEILKRLQREAFSDLMKLRDRQDKVERFISYYNKSSKGSPFQEASTRVQGEVDVFGAVLVANCFDQQAGDVLDEAGFRNGINSRFTFETVIRKNDSLKTELVASHNSIGFLGENMGNPLLLSKVSYAAQVTDWLSANVIPIGAQCRDIGNTNDTSLQGKGLREISSLEPPLMAQHCGGAIGITAKKSNVTASLAQFVSSGHCLGTFGRIIYQVSNGTKLSLSGLLQSSNSSQDISLGHLTIPLRASQHDEIPHASIELVSSPTTTTTDPNFSLGSVALSLESQLDECSRIGGWIEMQNSSSKHLKWAISLSDTPENDMGWRLGIRGTAESQNIWDQFQIEASLNLNIGETQKFSLQPSLVY…
11	Sa55F.279.2	MSLMFLMSKYLSEPGSTRATKRMVFASFIQEVKTLLPASTITLALGGVLLVLFFALTTGKRGKKEKSLKLPPPPGIPGLPILGNLLQLKEKKPHKTFTKWSEIYGPVYTVKLGAVSMVVLNNTDVAKEAMITRFPSISTRKLSTALAILTGNKCMVAVSDYDDFHKTVKRHIITSLLGSTAQKQHRCQRDLMMDNLCSRFLTYAKARPLEAVNYRETFDSELFALAIRQAVGTDVDRLHVEDLGTTVSKEEMYRILVTDLMEASIEVDWRDLFPYLRWVPNKSIEENMRRLVSRRMGVIKAMIREQKKRYSEGKELNCFLDYLVSKAKDLTEDQVATLIWEPIIETSDTTAVTTEWAMYELAKNPDCQERLLQDIQRICGDKKVSEDDLSQLPYLSAVF…
12	Sa57F.61	MLVYALLTSLGINSGLCLLFFTLYSVLRKQPINYNVYIPRLVADGKYKLASHFRLDRLLPSPGWVRQAWIISEDELLASSGLDAVVFQRLITFSLRVFSLAGVIGIFVLLPLNCLGDELEDIDFADFSNNSLDLFTISNVKNGSKWLWFHFASVYLVTIWTCFLLYYEYNYISVKRIAYFYATKPQAHQFTILVRGIPVSQGSSVSESVDKFFSEFYPSTYLSHMVVRRTNKLRGLISESKKLYERITHLQSDPGQHRTGCCGCLGLFQRPKADIVDQFEKKLEDLEENVRLQQSEVSSSDEETRAAFVSFKSQYAAAAVFNLQQSVDPTEWVTERAPEPNDVYWPFFSSSFLKRWIYKIIVIIACILLTILFLIPVLIVQGLTNLTQLEVLFPFLTSI…
13	Sa65F.11	MLGALQFGVVGLACIVLFVPMGMAGWHLSRNKILFFSGSLFISLAIVIHLSPYFPPIPDFASSSSSSSLHKSAFNRESCISYVHDVVFDVVASEVNHSEYSVSWDWNRKSSNVLECEFQKLSSVDVSDLLNGSWVVVAGDSQARFFVLSLLELVTDVEGMDMARGQLFKRHSNYRTVIDRIGMRLDYIWAPYESNVTDFIESLLRNGSYPDVFVMGSGLWHMLHITDAYDYGYNLRVLKSSVASVVAKYSEYGPEGGLAGTSNVRSPHLFWLGMPMLISSRMNTNEKRERMTNEMRVRYNTALHGSGILRPSGPLQLIDVMFLSQKCGNQCTVDGIHYERAVYEAAVHVMFNELLIESHQKL
14	Sa69F.45.3	MSLMFIMSKYLSEPGSTGATKRMVFASFIQEVKTLLPASTITLALGGVLLVLFFALTTGKRGKKEKSLKLPPPPGIPGLPILGNLLQLKEKKPHKTFTKWSEIYGPVYTVKLGAVSMVVLNNTDVAKEAMITRFPSISTRKLSTALAILTGNKCMVAVSDYDDFHKTVKRHIITSLLGSTAQKQHRCQRDLMMDNLCSRFLTYAKARPLEAVNYRETFDSELFSLAVRQAVGTDVDRLHVEDLGTTVSKEEMYRILVTDLMEASIEVDWRDLFPYLRWVPNKSIEENMRRLVSRRMGVIKAMIREQKKRYSEGKELNCFLDYLVSKAKDLTEDQVATLIWEPIIETSDTTAVTTEWAMYELAKNPDCQERLLQDIQRICGDKKVSEDDLSQLPYLSAVF…
15	Sa76F.91	MNVAGLLTSAGINIGLCVLFFSLYSILRKQPGLVGVFFARRVAQQHLRQCEHRIERFVPSASWIMKAWETTEEDLLASAGLDAVVFIKIVVFSIQIFSIAAVACLILVLPSNYYGKQMEHAHIPSEELEVFTIVNVQESSRWLWTHVVVLYLITCSACTLLYFNYKNITTLRLAHISRVPANLSYFTVLVRSIPRSSQESYSNSVRKFFTKYYASSYLSHQMVHPSGKVHMLMTNTEKMCKLLISTTADSQGKPSFVRCGLCGEMTSSFRILSTEDSVKNNHETHNSELTRNQKEHPAAFVFFKTRYGAFTASQGLQSSNPMLWVTNLAPDPCDVYWSNLCIPYRQLWIRKIANLIAAIAFMLLFLIPVTGAQALTNAGHLARIFPFLKKILKWKFMTQ…
16	Sa104F.62	MNVAGLLTSAGINIGLCVLFLSLYSILRKQPGIVGVFFARRVAQQHLRQLEHRIERFVPSASWILKAWETTEEELLASAGLDAVVFIKIVVFSIQIFSIAAVACLILVLPSNYYGKQMEHAHIPYEELEVFTIVNIQEGSRWLWTHVVALYLITCSACTLLYFNYKHITTLRLAHISRVPANLSYFTVLVRSVPRSSQEPYSESVRKFYSKYYASSYLSHQMVHPSGKVHKLKTNTEKMCKMLISTTTDSQGKPSLVRCGLCEELTSSFRIVSSKDSAKANHETHKSELTRNQKEHPAAFVFFKTRYGAFTASQGLQFSNPMLWVTNLAPDPCDVYWSNLCIPYRQLWIRKIATLIAAIAFMLLFLIPVTGAQALTNAGHLAKIFPFLKKILKWRFMTQ…
17	Sa144F.11	MWYYDVWLLRIFSALSFYCLILPLFSSYSNCAPVLINFGDSNSDTGGLLAGVGLPIGLPHGITFFHRGTGRLGDGRLIIDFLCENLKVNYLSPYLNSLDPNFTSGVNFAISGAATLPEFVPFSLDVQVRQFIHFKNRSIELIARGAKNLIHESGFQNAVYVIDIGQNDLLLALYASNLTYTLVAEQVPFFVSEIKLAIQKVYDSGGRKFWVHNTGPLGCSPKELAIHPHNDTDIDSIGCFRVHNEAARVFNEKLRNLCEQMRMLYNDATIVYVDIFTLKYNLFAEFKKLGFKRPLTACCGYGGLPNNYNRTATCGQPGYTLCSEVYKAIVWDGVHYTEAANRVAAAEILSARYSVPSIKLHELVQLLTLCFLTMGFGLRPVVSWTVLLIFSSFALTENV…
18	Sa214F.33	MTSSTITSSPVVSTGARISQTPDAFVDDMIGHFRAQLTVIRAKRAAEMEGSQYQGIIPCGPTSTMCEDRDKYVFWDPYHPSQAANIIIAKQLLDGDSRVITPMNLRQLLDL
19	Sa24F.28	MEKTMTTTEMSETNLVKDAHHPYAYHVSGPRNVCSPNWRDLIRSSWMDGNYKRTVMACFIQAVYLLELDRQENKAEENALAPKWWLPFKYKLSKTLIDERDGSIFGAILEWDHSAAFADLIPFRPRGAPKAVLALRGTLLKKSTIRRDVQDDLRFLAWESLKGSVRFKVAFEGLKGLSECYGSSKVCIAGHSLGAGFALQVGKELAKQGVYVETHLFNPPSVSLAMSFRNIGEKAESAWKRVKSMLPSNSETELETQSAADESENVSSLFSSWVPNIMGSKKWVPNLYVNNSDYICCNYNDPVENECTAERKENVAPSNSPVAAKLFVLSKGKQKFLEAHGLEQWWSDDLELQSALSSSKLISRQLKSLYSLPASLPSKLKPK
20	Sa36F.52	MASDHIIHSLHHILLSASILLIFTSSSVISIRTAHSHKAKSANEHGGINLNRSKILAVFVFGDSTVDPGNNNYLLTDFRSDFPPYGRDFIDSRPTGRFTNGRLVSY
21	Sa00F.1229	MISLLPESNTGSIFCAIFRYKDSMELSAPRYVISFRGTIPTFTKDLKVNWYLIKEKLKKTRRFKETVLFVEQHILNTENIWLTGHSMGASMALQLGKRWAINGVFIRTYLFNPPFISASFSSWIKNEDVRNIVHTLDNLIKVTWAGLNWMINPRKSLFKKFVGWKPMLYVHATDPVCSEYINYFQHRDKPKKNDLYRWMEMTATRHSKMTLFKNFMNNITNKDDDEEEDDEKRVEALHLIPSATLVENKAPVAGSFFSIKRQKCVIAHKLSQWWTADMELVTIDYSYEE
22	Sa0F.10-9	MRPRIYLFGDSITEESFSGGGWGAALAGHFARTADVVLRGYSGYNTRWALNVIDKVFPDDKVSPIAVTVFFGANDACLPDRCSGFQHVPIAEFKENLQAIVSFFKKRWPATEVILISPPPIDDEVRTLYPYIENISGLPERTNEAAGSFARATVEAAKNVGVRVIDLWTTMQKNPDWKTYLRDGLHLTSSGNKVVFDEVIKKLIEAGLSLDALPVDLPLISEIDPKDPLKAFES
23	Sa0F.1144	MDQMSTESADCGTCTMPIIIKEIWGWWVCGRFGIGELERGFCCVALSCVLSSILMEEGARNFWMPNSNPFGCLPLALTSSNATDDDIDNIGCLKSLNNITSHFNEELRILCENLQSNFSSSTLFYLDIYTIRYELIANYSAYACCGYGGFPYNVCADSAEFILVGTEGILQRRRMRLRSRQYLLRNI
24	Sa20F.274	MSSSASEFLRLFLMLSCLSTFVTKMVHCDSQVPCYFIFGDSLADAGNNNDLKTIAKANYPPYGVDFPEGPTGRFTNGLNYADIIAKLLGFDDFIPPYASAKGGEVLKGVNYASGAAGILDETGQNQGDRFSMNKQLALHERTISTLEIILKSRSATTEHLNKCIYTGRIRE
25	Sa20F.275	MPESYNSSNQYTPNSFARLLAEAYATQLKKLYEFGARKVAIVGIAQLGLTPVELARQGLAGVVIVNAAVEFFNIRLKFLVEDLNKNHPDAHFTYLNTAGIITASNEALNMVIAPRYYTALLPTDACPYDVQRLARL
26	Sa18F.279	MVGPDRPQFVLFGSSIVQFSFDDGGWGSILANLYARRADIVLRGYAGWNSRQALQALTRIFPKDAVVQPSLVIVYFGGNDSVKQELSGVGPHVPLSEYVENMKKIGLYLKGLSETTRVIFLSPPAVNEAQIKECFGEAGAGRTNEGCRRYSEACLYLCKLIDVKGIDLWTALQKRDNWLNTCFTDGVHLTADGSKIVAYEILKALKEADWKPSLHWKSLPIEFDECGPYGPDGINVSELNASKEW
27	Sa7F.445	MVSDRHKFDRSGPLHLSCVDWNNAHHRRSVAASLVQGVYILERDRQESRQGPDALATPWWDFFNFQLLEVLEDRDDQSIFGAVYCYKLLDLDNNSTKTGPPHYVIAFRGTITKGNAVTNDLHVNLELIRNGLHKTPRFEAAMVSVQQCCFICKGY
28	Sa7F.444	MAMKAGRNMAKNGIFLETHLFNPPFLSAPLERIKVKKVKHGLRFANSLVKAGLAAAVKTGQRGNPSEETFRVLQEWIPNLYVNPHDVICSEYVGYFEHRKKMEEMGAGHIEKLATQHSIGSLFMSAIGKHQESLHLIPSAMLTVNQSFGADFKQAHGIHQWWSPDSNLHSNLYKYGQ
29	Sa7F.416	MDDSHNEHLFHKFGPLHLKNVNWQADEANHCRTVAASLVEAVYALESDRTNYREGADALASPWWQFFKFGKIDHLVEASSGSVICAIFRYNNATECSAPLYVIAFRGTRIELDEDMKVNYELIKQKLKKTLRFKETISFVEKYFVKFKLMI
30	Sa192F.44	MQLILNPPLAFNLTSIYTLGSFTIFATLFQICIRKSSSSLAAVTESHCQFPRRSVFEVCPMTGPTRPQFVLFGSSIVQISYGNGGWGATLADIYSRKVDIVMRGYYGWNSRRALQVLDQVFPKDSAVQPTLVIVYFGGNDSMGPHPSGLGPHVPLPEYIENMRKIALHLKSLSDTIRIIFLSCPPINEAQLRKFQSPFLSELVRTNELCKSYSDACVALCQELDIKVIDLFHAFQKRADWMEVSFTDGVHLTDEGSNIVVEEILKVLKTAEWEPSLHWKSMPAEFNENSPYDLVAADGKRTINPSEWSFHWKRKWG
31	Sa22F.70	MAFHRSVGFLIYFLLLISILKKENIGFLNAAKTPRNTTNKILAVAVFVFGTQQLIQETITSFLQSLRVIFRLTAFIFKMASLQRCSLTDDWSLIFWCCKNAASYIGLKEYIPSYLDPTLSLQDLKTGVSFASAISGFDPLTSRLISVMIFKLLNYIVSLNLCS
32	Sa9F.418	MIPLNFGALDLNEANHRRTVAASLVMGVYALDSDRSENRLGDAALAPPWWQFFKFEVIDHLADPGSGSIYCAVFRSNSTDCSAPRYVIAFRGTILFEENNDLKMIWETIQQELKFTHRFKAAVSCSEKYISETNNIWLTGHSLGASMALHLGRELAMRGVLLQTHLFNSPFPSFPFGLIKNEELTTNVNIWDSVLKAAVIGILKQGESSEDSFEKLVNWKPILYVHPKDPVCLGYINYFKRRDDMEENGLGKIEKIATRHSKTSIIKNLLNNDNQEPMHLIPSATLIVNKTPVTAPKIKKWLSAHEVKQWWSADLALETTEYKYEV
33	Sa147F.93	MKNVTTILNKCIYTIGIGSNDYINNYFMPQFYNSSANYSPFAFAKLLINEHNRIVKGLFDLGAKKIAFIGVAHIGFTPYEFNFQWPGVTNATMLDHAIDLFNFELKASVNTLAKDVPEAKLTYLNSVGIASGAPAVSPEALKPCCQNIDNVSQITCKNGDLAICPDRAKTLFFDNIHPTEIVHQAVAARYYSAQDPSDAYPYDIQKLAALELDKENIFMERTSNESLVQTI
34	Sa88F.19	MYEDKMAMRSAAVKVVADDHQSQSAAHPYAFHVSGPRNVVSPNWKDLIASSWKDGNYKRTFMACLIQAVYLLELDKQEGRTGQNALAPNWWLPFKYNLTKTLIDDRDASIFGAVFEWDRSAVLSGMIPLRPSGAPRAVLALRGTLLKTQTITRDVQDDLRFLAWETLKGSVRFQRTFEALEFLAKSYGSSNVCIAGHSLGAGFALQVGRALAQQRIYVETHLFNPPSFSIAMALKNVGEKVDAAWNRLKNLLPLTNNTLPEPDTNQQIGKTPSSVFWNWVPNFYGSKLPDKTELNRWVPYLYVNKSDYICCNYTDVSAMTYKETSGKSDSYNTNNKAAAKLFIPLNGKNKFMEAHGLEQ
35	Sa46F.21-22	MRPRIYLFGDSITEESFSGGGWGAALAGHFARTADVVLRGYSGYNTRWALNVIDKVFPDDKVSPIAVTVFFGANDACLPDRCSGFQHVPIAEFKENLQAIVSFFKKRWPATEVILISPPPIDDEVRTLYPYIENISGLPERTNEAAGSFARATVEAAKNVGVRVIDLWTTMQKNPDWKTYLRDGLHLTPSGNKVVFDEVIKKLIEAGLSLDALPVDLPLISEIDPKDPLKAFES
36	Sa72F.8	MESERDNFNLSGPHHITCVDWSNVHHRRSVAASLVQGVYILERDRQTNRHGPQALASPWWDFFNFELLRLIVDTEDSSIFGAVYKFKFPEPGSANPSYVIAFRGTIPKGDSVTRDLKLNLQLIQHALHQTSSVQIATQSVKDIVELAKDDTIWLAGHSLGSAMAMLVGKKMAKTGTFLESYLFNPPFFSAPIERIQNPNVKHGIRFASSLLTAGLAVAMRNKQQTSQPYEDQFTPLTAWVPNLFVHPDDHICSEYIGYFEHRSKMDEYGVGVIEKLATQHSLGGLVLSAMGRETESLHLIPSAQLTVNLCRYEFFVEAHGIHQWWKEDLQLHSKVYKYQ
37	Sa40F.212	MTGPTRPQFVLFGSSIVQLSYSNGGWAATLADIYARKADILLRGYYGWNSRRALQVLHQVFPKDAAVQPTLVIVYFGGNDSMGPHSSGLGPHVPLPEFVDNMRKVAVHLKSLSSTIRIIFLTCPPVNEAKVRQNTSAYFSELVRTNELCKRYSDACVELCDELGIKVVDLYNALQKRDDWKEKCFIDGVHLAEEGSNIVVEEILQVLKEAEWKPSLHWKCMATEFSEDSPYDLVAANGKRTINPSEWTFHRKIKWD
38	Sa47F.313	MYEDKMAMRSAAVKVVADDHQSQSAAHPYAFHVSGPRNVVSPNWKDLIASSWKDGNYKRTFMACLIQAVYLLELDKQEGRTGQNALAPNWWLPFKYNLTKTLIDDRDASIFGAVFEWDRSAVLSGMIPLRPSGAPRAVLALRGTLLKTQTIRRDVQDDLRFLAWETLKGSVRFQRTFEALEFLAKSYGSSNVCIAGHSLGAGFALQVGRALAQQRIYVETHLFNPPSFSIAMALKNVGEKVDAAWNRLKNLLPLTNNTLPEPDTNQQIGKTPSSVFWNWVPNFYGSKLPDKTELNRWVPYLSVNKSDYICCNYTDVSAMTYKETSGKSDSYNTNNKAAAKLFIPLNGKNKFMEAHGLEQWWSDDLEIQMVFNNSKLIKMQLQSLTAK
39	Sa117F.4	MEDQMMMMDVDDVNNLEQIVHLNPRTITKARAISFDSHRRSKPYLVTPDKQYGIVTISFPAVWTVADFFDPNADSFGLTNIDRVLFPSLKYVGLDRFAKVNQAFQTRFVNLLKHSDLRREVEKAGQKQIVFTGRSSGASLAMLATLWLLETRRKSKATNTTNPICLTFGAPLVGDMVFHHAIERENWSSCFVNFVMKRDIVPRILLAPLSAIDQQFQPILNYLNPANGVNSLPNSSVEEFYINVMIKASATVSHAASELMGCTNMLLNNLASFNALSSYRPFGTYVFLTGNNTACVSRNSDAVLQLLFYSCQVEREKDICNNGCLKQLMDYPSEELCNSLSNNVINLDVFLENLTFTSGRGALDDLGVSTRGRICLMAAGESKKQKERNKANLNMKKDT…
40	Sa7F.370	MFAQLLGVPSPSPYADPTTVGARVLGGVNYASPASGILEESGSHYGGRYTLSQQVLNFQATLTTDLQRLLPGKNLTRYLARSIAVLVFGSDDYINNYLMAPAYNSSFNYKPPEFANLLLNRYARHILALRSMGLRKFVLLGLEPLGCIPNQLARGVAPPGRCVDPINQILGTFNEGLKLMVSQYNRNHPESIFVYGNTYAIFGDMLNNPSTYGLNVINRSCCGIRRNEGGITCVPNLFPCPNRNQYLFWDGFHATQAATTVLAGRLYYGPQNDCFPINVQQLALL
41	Sa40F.233	MIKANFLPYGRDFLTHSPTGRFSNGKLASDFTAEYLGFTSYPPAYSSPEANGSRLLTGVNFASAASGYYDTTATIYRAISLSQQLTNYRQYQNIVKEMVGLESADKIFAGGIHLLSTGTSDFAQNYYINPMMVTFYTPNRFSNLLMKSFTAFVQTLYDLGARRIGVTTLPPVGCLPAAITLFGRGSNHCVERLNRNALMFNDKLNVTSQVLQSRLPGLRLVVLDIYQPLFDMIMKPTDNGFFESRKACCGTGTVETSLLCNARSVGTCANATGYVFWDSFHPSEAANQVLAGSLLSQGISLIS
42	Sa44F.305	MIKANFLPYGRDFLTHSPTGRFSNGKLASDFTAEYLGFTSYPPAYSSPEANGSRLLTGVNFASAASGYYDTTATIYRAISLSQQLTNYRQYQNIVKEMVGLESADKIFAGGIHLLSTGTSDFAQNYYINPMMVTFYTPNRFSNLLMKSFTAFVQTLYDLGARRIGVTTLPPVGCLPAAITLFGRGSNHCVERLNRNALMFNDKLNVTSQVLQSRLPGLRLVVLDIYQPLFDMIMKPTDNGFFESRKACCGTGTVETSLLCNARSVGTCANATGYVFWDSFHPSEAANQVLAGSLLSQGISLIS
43	Sa162F.31	MLKETNQDWRVIPIQDQLKHFEALVKQNHLDKKLIQSSLYLLESGSNDIFNYFNPFYPPTLDQCAYVQAMLTETTNLITELYRLGARRIAIIGLGPVGCIPARALLPHAPIQKCFGKMNRMVKDYNHGLEALVNAMPVNYPGLVGVYGDVYLATQKLRTTPTTYGFSNVTHACCGGGVLGGTLQCGKEDYTMCSDPDQFFFWDYFHPTEHTYKFIADGLWAGGKASIRPVNLHTIANIREPFL
44	Sa36F.53	MCAGSYVGVKDYIPPFLDSTLSVEELKTGVSFASAGTGFDPLTAKLSNVIPISKQMEYFREYRTNMEKVIGKQEMDHIINHSIFVISSGTNDFGIDYFLVPIRRLSYTVSEYQDFLLNELKKLIQELRDEGSKKIGVVGLPPIGCLPLLITLFSEDDKLAGRECIESFSSIASDYNEKLKNELSSKTYRSEGLIVVYADIYTPLNLIGLKRLGEDVAEQVLSRHLFFATLRQVCAVMYRNMHFLMRYIRRRRRTCFYLNH
45	Sa0F.1	KTTVDVLAELLGFSDYIPPFARARGRTVLQGVNYASAAAGIRQETGLQLGQRTPFSGQVRNFRTTVSQIAYILGSTKAATDHISRCIISIGLGSNDYLNNYFMPLFYSSSRRYTPEQWADLLIREYSQNLRNVYEYGARKFVLIGVGEIGCSPSILAQRSPDGRTCSAEVNNANKYSTQSSSHLSMSSITTTIMQSSFTLMRTAFSMTYVLSLDLMV
46	Sa64F.61.2	MWRMGRCARRLLLSKGLFAPSIHSIQFILHHTISSQFCKMQVDVMNRGYSGYNTRWALFLLNHIFPLGTPNPPAAATVFFGANDAAVPGRASERQHIPVHEYKENLRKILIHIKNCSPEIFLVLITPPPVDEEGRIEYAISLYGDKAMKLAERSNESAGVYAKTCVELAAELGIPSIDLWSKMQKIEGWQKKCLSDGLHLTEIGNKLVYQELQKVFDEKWNDAASMPMDFPHHLEIDSNHPERAFTKVCLETMMPVQLCPATANGSMSTEQHF
47	Sa22F.249	MGIRAKVVLFGDSITEQSFRSGGWGAALADSYSRKVDVLNRGYGGYNTRWALFLLNHIFPFGSSDPPGAATVFFGANDAALPGRTSEKQHVPVDEYKENLRNILLHIKKCSPDIFLVLITPPPVDEEGRKEYAISLYGDKAMKLPERTNEVTGIYAKTCVDLAAELGIPSIDLWSNMQKIEGWQKKCLSDGLHLTENGNKLVYQELQKVFNEKWHDAETMPSDFPHHSQIDGNHPEKAFTHLCSDTTSSVQQCPATGNGSMST
48	Sa161F.73	MFVLGDSSVDCGDNTLFYSLLHRNRSLFPCNGSDSSLVPYLLAEKMGLEQMQGFYSLDGSISGMLRGINFGSAQATIMMNSGRSNLQSLSQQLRQVMDTFQLLQLQLGENAAKDLISSFIFYMSFGKDDYTDIFLSNSSGIMLKGGSEFAHMLVSQMIRGLRELYRADVRKIVVMGILPLGCAPRIMWYWRNVTRNNAGGGCVDEVNDLVVAYNNLLENSVADFRIKYPDALVVFCDVYRVVLDVVTRPTSYGFEDVKSACCGLGWHGAAIGCLSLETTSCNGSSSHVWWDFYNPTFAVNSMLAETAWSGKPIPDICRPLSISKLVSA
49	Sa2F.434	MLLLISFSFSSLRHLLMAMFQTTANGGVVNVMVVVILTLCVWSCAETLDEDLGLGASYIFGDSLVDAGNNNYLPTLSKANIKPNGIDFKASGGNPTGRYTNGRTIGDIVGEELGQPHFAAPFLAPNTTGRAILHGVNYASGGGGVMNSTGRIFVNRLSMDIQIDYFNITRNQIDKLLGPSKAREYIMKKSIFSVTVGANDFLNNYLLPVLSIGARISQTPDQFIDDVITHLKIQLNRLYQLDARKFVIGNVGPIGCIPYQKTINQLEENQCVELANKLAIQYNGRLKDLLTELNENLPGATFVHANVFNLVMDLITNYAKYGFKSASRACCGNGGQFQGIIPCGPTVYYVRRSQ
50	Sa3F.568	MSPQKLLPIITYLLCISLIFRFECSNAQLVPAVYVFGDSLVDVGNNNHLPISIAKADFPHNGMDFPTKKATGRFCNGKNAADFLADKLGVSTSPPYLSIVSRLKKNTAPFISGVSFASGGAGIFNGTDNILRQSLPLTKQLEYYSVVYQELVKQLGPAAANTHLSKSIFAIVIGSNDAFGYDNLDSKAKNATTPQRYAQRMVTLLQSHITRIYSEGARKLVITGIGPVGCCPAQRNKNKDQCNEVVNNVAQTYNEALKSMLQSLQSTT
51	Sa144F.31	MGFSFSKWVWLPSLIALTTIFVTTGQPLVPAMFIFGDSVVDAGNNNRLYTVVKANFPPYGRDFVNHIPTGRFCNGKLASDFTVENIGFTSYPPAYLSEEATGSNLLIGANFASGGSGYFDHTAKLYNAISLSQQLEYYKQYQTKLIQIAGNQNATSTISGAIYLLSAGSSDFVQNYYINPHLYKYYTPDQFSDILLQSYSAFIQTLYSLGARRIGVTTMPPIGCLPTSITIFGAGSNGCVQKMNRDAISFNQKLNQTSQTLQQKLNGLNLVVFDIYEPLYSLVINPSDNGSTEQSVIEVFQ
52	Sa0F.210	MSIGISFLHCNVALLMALFGLMTVNAEVPAVFIFGDSTADVGTNTHLPDCTARADFPYNGIDFPHSRPTGRFSNGLNSADFLAKLFGLPRSPPSFLSLVNNTRLLDINMYRGINFASGGSGILSETGRTDRVVTMGEQVQQLNIVKTRLQTKMGSALASEFLAKSLFFISVGSNDLFGYYYSNRNVSEDEFILTLGLAYKEHLKNLMSIGARKFGIISVAPIGCCPSQRAQNTSGGCLENLNDLAQGFYSSILTTLQKLSSDNQGLKYSLGNAFEMTINVINNPAPFGFEEVKTACCGSGDFNW
53	Sa26F.234	MQVPIPYNHCHRFAAVILVLCICTSVSETKIVLPGNETIPAVLIFGDSIVDSGNNNDLKYSVIKANFLPYGRDFNGSVPTGRFCNGRVPSDMIASELGIKDTVPAYLDPNLKSNDLLTGVSFASGGAGYDPLTATLVSVISLPQQLEYFKEYKTKLTSLVGENQTNFIISKSLYLVVAGSDDIVNTYFISRIRQIEYDVPTYTSFLADHASDFFKQLYEMGARRIGVFNAPPLGCLPSQRTLAGGLARNCAEIITKLLNHTTQNCHLKSTPSTKSYLMSRLFTLTSTLHSLI
54	Sa103F.60	MCSFRHFFTTILFLFFISISKICLNNADAVPSLFVFGDSLVDVGNNNYIKTRSKADKKQNGIDFGGPTGRFTNGRVIVDILGQKLGLDDFIPPYLAPTTTGPVVLKGVNYGSGSSGILNETGITFFKNNINMDAQIDNFMNTRQTIIELKGENGAKNLLRTNSLFLVVTGSNDLLNNYLLPCVSLCLQYRTSPSEFVLILITRLRKQIMRLYRFDARKFIVTELPPVGCIPYMRDRNMFKGRSGCHKRANDMALMYNVKLKELVNNLRMQLEGSHFVFVHVYDIVSHIIQNYKSFGFEKADSACCRSFGKHGGLRKCNPSSRVCDDRSKYVFWDGYHPTEATFEILAKYILDGNSNLHFTLLFCDLIFTKMCSFRHFFATILFLFINISKICLINADPV…
55	Sa25F.118	MTLAKCNYKPYGIDLGGNPTGRFTNGRTMVDVLGQKLGIKGFIPPYTAATTVGKVVLKGVNYASGSAGILKYTGKIAIQNINMNDQIDNFANTSQAIKSIIGKNSAQKLLKKDSLFLIAIGSNDFILNYLFPIISKPYQRHIPSKKFISFLITKLKKHIKRLYEMDARKFIVADIAPVGCAPTMIDTHHTINTTDHCYSRANDIVQMFNKELKKLVFELRSELKGSAFIYVDVYRIFKDIVEHYKSYGFENRDSACCRLLGKHGGVISCTSLSEVCADRKKYIFWDGFHPTEAVNIIVANRVLNGKAPDVFPMNVRKMCNFRYSYLLINLILTLFNILDINMANTVPAIFVFGDSLLDVGNNNYITTLAKRNYKPYGIDFGNRPTGRFTNGRTMVDVLG…
56	Sa95F.99	MACVMVKKLLLCVIGVVLTLGFGVVIAQPQVPGYFIFGDSLVDNGNNNNIASLAMANYLPYGIDFVPPGPTGRFSNGKTTVDVISELLGFRNYIPPFASARGRAVLGGVNFASAAAGIRDETGQQLGGRTPFSGQVRNYQTVVTQITSILGSAQAAADHLSKCIFSIGLGSNDYLNNYFMPLVYSSSRLYTPEQWADLLVREYSQNLRTIYNYGARKFVLIGVGQVGCSPSILAQRSPDGKTCVAEVNNANRIFNTKLKSLVDQFNSNFTDAKFIYIDAYGIFNDLVTKPASYGLRVTNAGCCGVGRNNGQITCLPAQTPCNNRKEYLFWDAFHPTEAANAIVARRSYSAQTCFLLVNFQIQHTTSLIRMSPVFILILLFSISIVVHGTPQVPCYFIFG…
