# Supplementary material for: Identification and expression analysis of the GDSL esterase/lipase family genes, and the characterization of SaGLIP8 in Sedum alfredii Hance under cadmium stress
Source: PeerJ. 2019 Apr 16;7:e6741. doi: 10.7717/peerj.6741 (PMC6474334; doi:10.7717/peerj.6741)
Supplement: Table S5 — Blue represents the intron. CDS, coding sequence. Sa, Sedum alfredii. [file peerj-07-6741-s005.xlsx]

## Sheet: Sheet1
Table S5 The number of exons and introns in SaGELPs
No.	Gene name	CDS length	Genome length	Exon 1		Intron 1		Exon 2		Intron 2		Exon 3		Intron 3		Exon 4		Intron 4		Exon 5		Intron 5		Exon 6		Intron 6		Exon 7
				Start	End	Start	End	Start	End	Start	End	Start	End	Start	End	Start	End	Start	End	Start	End	Start	End	Start	End	Start	End	Start	End
1	Sa0F.11	1089	1641	1	259	260	360	361	491	492	603	604	838	839	1077	1078	1348	1349	1448	1449	1641
2	Sa0F.223	1143	1433	1	235	236	343	344	550	551	630	631	792	793	894	895	1433
3	Sa0F.262	1056	1251	1	369	370	464	465	955	956	1055	1056	1251
4	Sa0F.41	1089	1744	1	253	254	589	590	712	713	858	859	1103	1104	1187	1188	1441	1442	1530	1531	1744
5	Sa0F.898	1113	1555	1	429	430	514	515	1005	1006	1362	1363	1555
6	Sa105F.31	1095	2268	1	280	281	1034	1035	1156	1157	1304	1305	1539	1540	1717	1718	1973	1974	2066	2067	2268
7	Sa10F.217	1104	1274	1	420	421	503	504	993	994	1080	1081	1274
8	Sa10F.441	1056	1234	1	369	370	467	468	958	959	1038	1039	1234
9	Sa110F.22	1197	1520	1	253	254	389	390	538	539	627	628	1196	1197	1294	1295	1520
10	Sa116F.110	1155	1532	1	247	248	350	351	552	553	652	653	818	819	906	907	1179	1180	1265	1266	1532
11	Sa116F.65	1320	2123	1	93	94	252	253	309	310	619	620	884	885	990	991	1190	1191	1275	1276	1446	1447	1517	1518	1788	1789	1860	1861	2123
12	Sa121F.27	1086	1471	1	235	236	334	335	460	461	555	556	800	801	900	901	1157	1158	1248	1249	1471
13	Sa129F.2	1092	2135	1	262	263	1066	1067	1188	1189	1267	1268	1483	1484	1564	1565	1818	1819	1897	1898	2135
14	Sa12F.49	1092	1458	1	256	257	349	350	472	473	547	548	795	796	891	892	1128	1129	1230	1231	1458
15	Sa136F.34	1134	1622	1	283	284	457	458	578	579	664	665	893	894	1045	1046	1308	1309	1384	1385	1622
16	Sa13F.102	1098	1461	1	241	242	320	321	446	447	545	546	790	791	879	880	1134	1135	1230	1231	1461
17	Sa13F.118	1125	1562	1	265	266	418	419	643	644	734	735	886	887	990	991	1265	1266	1354	1355	1562
18	Sa14F.252.1	1188	1480	1	234	235	330	331	462	463	552	553	801	802	907	908	1480
19	Sa184F.22	1089	1460	1	238	239	329	330	455	456	552	553	798	799	876	877	1132	1133	1237	1238	1460
20	Sa18F.151	1164	1930	1	262	263	747	748	964	965	1051	1052	1202	1203	1293	1294	1571	1572	1674	1675	1930
21	Sa1F.117	1032	1470	1	6	7	105	106	313	314	461	462	737	738	819	820	1120	1121	1229	1230	1470
22	Sa207F.22	1119	1442	1	241	242	317	318	451	452	513	514	757	758	858	859	1108	1109	1192	1193	1442
23	Sa20F.120	1359	1600	1	427	428	497	498	629	630	728	729	961	962	1033	1034	1600
24	Sa217F.43	999	1451	1	238	239	319	320	445	446	551	552	795	796	870	871	928	929	1019	1020	1120	1130	1228	1229	1451
25	Sa248F.34	1062	1411	1	250	251	379	380	507	508	574	575	808	809	883	884	1140	1141	1218	1219	1411
26	Sa24F.223	1059	1226	1	624	625	722	723	977	978	1046	1047	1226
27	Sa24F.262	1089	1517	1	253	254	327	328	457	458	546	547	672	673	765	766	875	876	959	960	1209	1210	1297	1298	1517
28	Sa258F.41	1095	1441	1	268	269	355	356	486	487	576	577	811	812	903	904	1169	1170	1246	1247	1441
29	Sa26F.146	1131	1658	1	253	524	350	351	572	573	829	830	979	980	1066	1067	1340	1341	1426	1427	1658
30	Sa26F.158	1092	1488	1	241	242	558	559	803	804	914	915	1171	1172	1265	1266	1488
31	Sa27F.42	1149	1846	1	244	245	337	338	547	548	657	658	830	831	932	933	1205	1206	1597	1598	1846
32	Sa28F.36	1119	1851	1	298	299	384	385	517	518	770	771	1003	1004	1085	1086	1339	1340	1650	1651	1851
33	Sa28F.37	900	2367	1	315	316	582	583	715	716	1502	1503	1758	1859	2171	2172	2367
34	Sa28F.38	1098	1468	1	292	293	415	416	546	547	642	643	876	877	955	956	1212	1213	1284	1285	1468
35	Sa28F.39	1095	1464	1	277	278	374	375	505	506	622	623	857	858	937	938	1193	1194	1268	1269	1464
36	Sa29F.188.1	1146	1383	1	247	248	330	331	458	459	539	540	773	774	846	847	1383
37	Sa29F.343	1068	1246	1	384	385	475	476	966	967	1053	1054	1246
38	Sa2F.358	1053	1402	1	56	57	142	143	342	343	449	450	722	723	794	795	1101	1102	1185	1186	1402
39	Sa314F.6	1113	1465	1	262	263	437	438	563	564	644	645	1146	1147	1242	1243	1465
40	Sa32F.165	1092	1730	1	244	245	329	330	455	456	536	537	781	782	880	881	1103	1104	1476	1477	1730
41	Sa33F.119	1179	3044	1	358	359	1648	1649	1779	1780	2108	2109	2342	2343	2480	2481	2740	2741	2848	2849	3044
42	Sa36F.86	1116	1919	1	237	238	454	455	583	584	670	671	912	913	1326	1327	1575	1576	1660	1661	1919
43	Sa39F.196	1149	1236	1	634	635	721	722	1236
44	Sa39F.291	1206	1608	1	352	353	435	436	564	565	662	663	901	902	1004	1005	1261	1262	1379	1380	1608
45	Sa3F.277	1104	1478	1	251	252	336	337	464	465	561	562	804	805	871	872	1133	114	1258	1259	1478
46	Sa3F.554	1107	2763	1	277	278	382	383	514	515	942	943	1174	1175	2220	2221	2493	2494	2570	2571	2763
47	Sa42F.134	1107	1932	1	265	266	353	354	482	483	570	571	699	700	764	765	875	876	955	956	1205	1206	1709	1710	1932
48	Sa45F.55	1074	1406	1	270	271	344	345	476	478	556	557	793	794	891	892	1136	1137	1216	1217	1406
49	Sa46F.118	1146	1452	1	268	269	351	352	483	484	575	576	809	810	902	903	1180	1181	1218	1219	1452
50	Sa46F.20	1095	1647	1	265	266	609	610	841	842	1080	1081	1354	1355	1454	1455	1647
51	Sa46F.270	1131	1479	1	214	215	319	320	499	500	574	575	756	757	844	845	1125	1126	1229	1230	1479
52	Sa46F.31	1089	1379	1	238	239	572	573	817	818	899	900	1379
53	Sa47F.286	1140	1643	1	235	236	313	314	523	524	623	624	796	797	904	905	1179	1180	1396	1397	1643
54	Sa55F.146	1167	1641	1	255	256	477	478	666	667	745	746	934	935	1012	1013	1290	1291	1385	1386	1641
55	Sa56F.143	1104	1444	1	274	275	348	349	479	480	550	551	782	783	870	871	1144	1145	1251	1252	1444
56	Sa57F.156	1137	1980	1	282	283	356	357	484	485	959	960	1200	1201	1394	1395	1649	1650	1749	1750	1980
57	Sa5F.25	1056	1323	1	371	372	495	496	988	989	1131	1132	1323
58	Sa5F.658	1089	1612	1	222	223	356	357	484	485	605	606	846	847	1018	1019	1272	1273	1368	1369	1612
59	Sa64F.90	1107	2001	1	274	275	405	406	536	537	632	633	866	867	1468	1469	1725	1726	1790	1791	2001
60	Sa66F.83	1188	1514	1	270	271	340	341	460	461	539	540	773	774	859	860	1119	1120	1210	1211	1514
61	Sa6F.163.1	1197	1635	1	248	249	364	365	821	822	1060	1061	1312	1313	1395	1396	1635
62	Sa6F.233	1089	2212	1	248	249	1120	1121	1306	1307	1410	1411	1571	1572	1650	1651	1916	1917	1984	1985	2212
63	Sa72F.20	1068	1249	1	612	613	690	691	954	955	1057	1058	1249
64	Sa79F.141	1164	1753	1	330	331	610	611	744	745	856	857	1101	1102	1208	1209	1464	1465	1554	1555	1753
65	Sa79F.142	1122	1644	1	307	308	418	419	550	551	645	646	880	881	1125	1126	1383	1384	1454	1455	1644
66	Sa79F.143	1131	3312	1	313	314	2192	2193	2323	2324	2435	2436	2666	2667	2758	2759	3018	3019	3116	3117	3312
67	Sa7F.179	1071	1874	1	244	245	341	342	467	468	673	674	918	919	1336	1337	1565	1566	1647	1648	1874
68	Sa7F.184	1107	1884	1	274	275	561	562	693	694	782	783	1016	1017	1341	1342	1615	1616	1691	1692	1884
69	Sa7F.458	1104	1799	1	62	63	127	128	363	364	816	817	1089	1090	1177	1178	1489	1490	1578	1579	1799
70	Sa7F.504	1143	1843	1	241	242	330	331	532	533	615	616	797	798	878	879	1149	1150	1596	1597	1843
71	Sa81F.175	1107	1425	1	248	249	330	331	458	459	537	538	786	787	857	858	1114	1115	1200	1201	1425
72	Sa82F.57	1074	1471	1	238	239	341	342	463	464	547	548	796	797	893	894	1131	1132	1244	1245	1471
73	Sa84F.200	1140	1489	1	235	236	328	329	539	540	623	624	776	777	855	856	1128	1129	1221	1222	1489
74	Sa86F.120	1098	1485	1	214	215	316	317	496	497	612	613	761	762	849	850	1130	1131	1235	1236	1485
75	Sa92F.24	1128	1474	1	301	302	388	389	519	520	609	610	844	845	936	937	1202	1203	1279	1280	1474
76	Sa95F.131	1119	1470	1	262	263	360	361	490	491	570	571	811	812	900	901	1154	1155	1238	1239	1470
77	Sa99F.11	1113	1870	1	216	217	379	380	500	501	568	569	817	818	904	905	1141	1142	1266	1267	1310	1311	1344	1345	1542	1543	1822	1823	1870
78	Sa9F.272	1920	1999	1	1410	1411	1489	1490	1999
79	Sa9F.31	1164	1591	1	271	272	426	427	560	561	645	646	897	898	978	979	1244	1245	1350	1351	1591
80	Sa9F.81	1557	1696	1	791	792	930	931	1696
