# Supplementary material for: Identification and expression analysis of the GDSL esterase/lipase family genes, and the characterization of SaGLIP8 in Sedum alfredii Hance under cadmium stress
Source: PeerJ. 2019 Apr 16;7:e6741. doi: 10.7717/peerj.6741 (PMC6474334; doi:10.7717/peerj.6741)
Supplement: Table S7 — GO, Gene Ontology. KEGG, Kyoto Encyclopedia of Genes and Genome. [file peerj-07-6741-s007.xlsx]

## Sheet: Sheet1
	Table S7 The hub genes and edge genes
	Name of hub genes	Name of edge gene	GO	IPR	KEGG	Swissprot
	Sa0F.262	Sa1F.528	GO:0006839; mitochondrial transport; Biological Process::GO:0031966; mitochondrial membrane; Cellular Component	IPR002030; Mitochondrial brown fat uncoupling protein::IPR018108; Mitochondrial substrate/solute carrier	mitochondrial uncoupling protein 2; K15103 solute carrier family 25 (mitochondrial uncoupling protein), member 8/9 (A)	Mitochondrial uncoupling protein 2 OS=Arabidopsis thaliana GN=PUMP2 PE=2 SV=1
	Sa0F.262	Sa2F.140	GO:0006812; cation transport; Biological Process::GO:0008324; cation transmembrane transporter activity; Molecular Function::GO:0016021; integral to membrane; Cellular Component::GO:0055085; transmembrane transport; Biological Process	IPR002524; Cation efflux protein	ZIP zinc/iron transport family protein; K14709 solute carrier family 39 (zinc transporter), member 1/2/3 (A)	Metal tolerance protein 4 OS=Oryza sativa subsp. japonica GN=MTP4 PE=2 SV=1
	Sa0F.262	Sa6F.269	GO:0004252; serine-type endopeptidase activity; Molecular Function::GO:0005618; cell wall; Cellular Component::GO:0006508; proteolysis; Biological Process::GO:0016020; membrane; Cellular Component::GO:0042802; identical protein binding; Molecular Function::GO:0043086; negative regulation of catalytic activity; Biological Process	IPR000209; Peptidase S8/S53 domain::IPR003137; Protease-associated domain, PA::IPR010259; Proteinase inhibitor I9::IPR010435; Peptidase S8A, DUF1034 C-terminal::IPR015500; Peptidase S8, subtilisin-related	peptidase, putative (EC:3.4.21.25); K18443 golgi-specific brefeldin A-resistance guanine nucleotide exchange factor 1 (A)	Subtilisin-like protease SBT2.5 OS=Arabidopsis thaliana GN=SBT2.5 PE=2 SV=1
	Sa0F.262	Sa19F.344	GO:0000976; transcription regulatory region sequence-specific DNA binding; Molecular Function::GO:0003677; DNA binding; Molecular Function::GO:0003700; sequence-specific DNA binding transcription factor activity; Molecular Function::GO:0005634; nucleus; Cellular Component::GO:0006355; regulation of transcription, DNA-dependent; Biological Process::GO:0043565; sequence-specific DNA binding; Molecu…	IPR000047; Helix-turn-helix motif::IPR001356; Homeobox domain::IPR003106; Leucine zipper, homeobox-associated	homeobox-leucine zipper protein ATHB-6-like; K09338 homeobox-leucine zipper protein (A)	Homeobox-leucine zipper protein ATHB-16 OS=Arabidopsis thaliana GN=ATHB-16 PE=2 SV=2
	Sa0F.262	Sa30F.88	GO:0006869; lipid transport; Biological Process::GO:0008289; lipid binding; Molecular Function	IPR000528; Plant lipid transfer protein/Par allergen::IPR016140; Bifunctional inhibitor/plant lipid transfer protein/seed storage helical domain	NA	Non-specific lipid-transfer protein OS=Beta vulgaris GN=IWF1' PE=3 SV=1
	Sa0F.262	Sa30F.88	GO:0006869; lipid transport; Biological Process::GO:0008289; lipid binding; Molecular Function	IPR000528; Plant lipid transfer protein/Par allergen::IPR016140; Bifunctional inhibitor/plant lipid transfer protein/seed storage helical domain	NA	Non-specific lipid-transfer protein OS=Beta vulgaris GN=IWF1' PE=3 SV=1
	Sa0F.262	Sa33F.19	GO:0000976; transcription regulatory region sequence-specific DNA binding; Molecular Function::GO:0003677; DNA binding; Molecular Function::GO:0003700; sequence-specific DNA binding transcription factor activity; Molecular Function::GO:0005634; nucleus; Cellular Component::GO:0006355; regulation of transcription, DNA-dependent; Biological Process::GO:0043565; sequence-specific DNA binding; Molecu…	IPR000047; Helix-turn-helix motif::IPR001356; Homeobox domain::IPR003106; Leucine zipper, homeobox-associated	POPTRDRAFT_820741; homeobox-leucine zipper family protein; K09338 homeobox-leucine zipper protein (A)	Homeobox-leucine zipper protein ATHB-13 OS=Arabidopsis thaliana GN=ATHB-13 PE=2 SV=2
	Sa0F.262	Sa33F.35	GO:0006855; drug transmembrane transport; Biological Process::GO:0015238; drug transmembrane transporter activity; Molecular Function::GO:0015297; antiporter activity; Molecular Function::GO:0016020; membrane; Cellular Component::GO:0055085; transmembrane transport; Biological Process	IPR002528; Multi antimicrobial extrusion protein	protein DETOXIFICATION 29-like; K03327 multidrug resistance protein, MATE family (A)	Protein TRANSPARENT TESTA 12 OS=Arabidopsis thaliana GN=TT12 PE=2 SV=1
	Sa0F.262	Sa48F.28	GO:0016021; integral to membrane; Cellular Component::GO:0055085; transmembrane transport; Biological Process	IPR004837; Sodium/calcium exchanger membrane region	vacuolar cation/proton exchanger 3-like; K07300 Ca2+:H+ antiporter (A)	Vacuolar cation/proton exchanger 5 OS=Arabidopsis thaliana GN=CAX5 PE=2 SV=1
	Sa0F.262	Sa70F.189	GO:0003677; DNA binding; Molecular Function::GO:0003700; sequence-specific DNA binding transcription factor activity; Molecular Function::GO:0006355; regulation of transcription, DNA-dependent; Biological Process	IPR001471; AP2/ERF domain::IPR003340; B3 DNA binding domain	AP2/ERF and B3 domain-containing transcription factor RAV1-like; K09287 RAV-like factor (A)	AP2/ERF and B3 domain-containing transcription factor RAV1 OS=Arabidopsis thaliana GN=RAV1 PE=1 SV=1
	Sa0F.262	Sa100F.87	GO:0005509; calcium ion binding; Molecular Function::GO:0005544; calcium-dependent phospholipid binding; Molecular Function	IPR001464; Annexin::IPR009118; Annexin, plant::IPR018502; Annexin repeat	annexin D1; K17095 annexin A7/11 (A)	Annexin D1 OS=Arabidopsis thaliana GN=ANN1 PE=1 SV=1
	Sa0F.262	Sa105F.85	GO:0055085; transmembrane transport; Biological Process	IPR002067; Mitochondrial carrier protein::IPR018108; Mitochondrial substrate/solute carrier	mitoferrin-like; K15113 solute carrier family 25 (mitochondrial iron transporter), member 28/37 (A)	Mitoferrin OS=Dictyostelium discoideum GN=mcfF PE=3 SV=1
	Sa0F.262	Sa147F.53	GO:0004252; serine-type endopeptidase activity; Molecular Function::GO:0005618; cell wall; Cellular Component::GO:0006508; proteolysis; Biological Process::GO:0016020; membrane; Cellular Component::GO:0042802; identical protein binding; Molecular Function::GO:0043086; negative regulation of catalytic activity; Biological Process	IPR000209; Peptidase S8/S53 domain::IPR003137; Protease-associated domain, PA::IPR010259; Proteinase inhibitor I9::IPR010435; Peptidase S8A, DUF1034 C-terminal::IPR015500; Peptidase S8, subtilisin-related	peptidase, putative (EC:3.4.21.25); K18443 golgi-specific brefeldin A-resistance guanine nucleotide exchange factor 1 (A)	Subtilisin-like protease SBT2.5 OS=Arabidopsis thaliana GN=SBT2.5 PE=2 SV=1
	Sa0F.262	Sa164F.6	GO:0003677; DNA binding; Molecular Function::GO:0003700; sequence-specific DNA binding transcription factor activity; Molecular Function::GO:0006355; regulation of transcription, DNA-dependent; Biological Process::GO:0043565; sequence-specific DNA binding; Molecular Function	IPR001356; Homeobox domain::IPR006563; POX domain::IPR008422; Homeobox KN domain	BEL1-like homeodomain protein 9; K15613 homeobox protein Meis1 (A)	BEL1-like homeodomain protein 8 OS=Arabidopsis thaliana GN=BLH8 PE=1 SV=1
	Sa0F.898	Sa1F.459	GO:0015095; magnesium ion transmembrane transporter activity; Molecular Function::GO:0015693; magnesium ion transport; Biological Process::GO:0016020; membrane; Cellular Component::GO:0030001; metal ion transport; Biological Process::GO:0046873; metal ion transmembrane transporter activity; Molecular Function::GO:0055085; transmembrane transport; Biological Process	IPR002523; Mg2+ transporter protein, CorA-like/Zinc transport protein ZntB::IPR026573; Magnesium transporter MRS2/LPE10	magnesium transporter MRS2-11, chloroplastic; K16075 magnesium transporter (A)	Magnesium transporter MRS2-11, chloroplastic OS=Arabidopsis thaliana GN=MRS2-11 PE=2 SV=1
	Sa0F.898	Sa1F.565	GO:0006952; defense response; Biological Process::GO:0043531; ADP binding; Molecular Function	IPR000767; Disease resistance protein::IPR002182; NB-ARC	animal HSPA9 nucleotide-binding domain protein; K03283 heat shock 70kDa protein 1/8 (A)	TMV resistance protein N OS=Nicotiana glutinosa GN=N PE=1 SV=1
	Sa0F.898	Sa1F.592	GO:0055085; transmembrane transport; Biological Process	IPR002067; Mitochondrial carrier protein::IPR018108; Mitochondrial substrate/solute carrier	probable mitochondrial adenine nucleotide transporter BTL3; K14684 solute carrier family 25 (mitochondrial phosphate transporter), member 23/24/25/41 (A)	Probable mitochondrial adenine nucleotide transporter BTL3 OS=Arabidopsis thaliana GN=At5g64970 PE=2 SV=1
	Sa0F.898	Sa1F.718	GO:0003700; sequence-specific DNA binding transcription factor activity; Molecular Function::GO:0006355; regulation of transcription, DNA-dependent; Biological Process::GO:0043565; sequence-specific DNA binding; Molecular Function	IPR004827; Basic-leucine zipper domain	transcription factor RF2b-like; K04374 cyclic AMP-dependent transcription factor ATF-4 (A)	Probable transcription factor PosF21 OS=Arabidopsis thaliana GN=POSF21 PE=2 SV=1
	Sa0F.898	Sa2F.434	GO:0006629; lipid metabolic process; Biological Process::GO:0016788; hydrolase activity, acting on ester bonds; Molecular Function	IPR001087; Lipase, GDSL	geranylgeranyl diphosphate reductase, chloroplastic; K10960 geranylgeranyl reductase [EC:1.3.1.83] (A)	GDSL esterase/lipase At2g23540 OS=Arabidopsis thaliana GN=At2g23540 PE=2 SV=1
	Sa0F.898	Sa3F.371	GO:0006629; lipid metabolic process; Biological Process::GO:0016717; oxidoreductase activity, acting on paired donors, with oxidation of a pair of donors resulting in the reduction of molecular oxygen to two molecules of water; Molecular Function::GO:0055114; oxidation-reduction process; Biological Process	IPR005804; Fatty acid desaturase, type 1::IPR021863; Protein of unknown function DUF3474	omega-6 fatty acid desaturase, endoplasmic reticulum; K10256 omega-6 fatty acid desaturase / acyl-lipid omega-6 desaturase (Delta-12 desaturase) [EC:1.14.19.6 1.14.19.22] (A)	Omega-6 fatty acid desaturase, endoplasmic reticulum isozyme 2 OS=Glycine max GN=FAD2-2 PE=2 SV=1
	Sa0F.898	Sa3F.522	GO:0003924; GTPase activity; Molecular Function::GO:0005525; GTP binding; Molecular Function::GO:0005622; intracellular; Cellular Component::GO:0006184; GTP catabolic process; Biological Process::GO:0006886; intracellular protein transport; Biological Process::GO:0006913; nucleocytoplasmic transport; Biological Process::GO:0007165; signal transduction; Biological Process::GO:0007264; small GTPase…	IPR001806; Small GTPase superfamily::IPR002041; Ran GTPase::IPR003578; Small GTPase superfamily, Rho type::IPR003579; Small GTPase superfamily, Rab type::IPR020849; Small GTPase superfamily, Ras type::IPR024156; Small GTPase superfamily, ARF type	ras-related protein RABE1a-like; K07901 Ras-related protein Rab-8A (A)	Ras-related protein RABE1c OS=Arabidopsis thaliana GN=RABE1C PE=1 SV=1
	Sa0F.898	Sa3F.578	GO:0006869; lipid transport; Biological Process::GO:0008289; lipid binding; Molecular Function	IPR000528; Plant lipid transfer protein/Par allergen::IPR016140; Bifunctional inhibitor/plant lipid transfer protein/seed storage helical domain	NA	Non-specific lipid-transfer protein-like protein At2g13820 OS=Arabidopsis thaliana GN=At2g13820 PE=1 SV=1
	Sa0F.898	Sa3F.578	GO:0006869; lipid transport; Biological Process::GO:0008289; lipid binding; Molecular Function	IPR000528; Plant lipid transfer protein/Par allergen::IPR016140; Bifunctional inhibitor/plant lipid transfer protein/seed storage helical domain	NA	Non-specific lipid-transfer protein-like protein At2g13820 OS=Arabidopsis thaliana GN=At2g13820 PE=1 SV=1
	Sa0F.898	Sa4F.391	GO:0006914; autophagy; Biological Process::GO:0015031; protein transport; Biological Process::GO:0032258; CVT pathway; Biological Process	IPR004241; Autophagy-related protein Atg8 family::IPR027731; Autophagy-related protein 8	uncharacterized LOC100527884; K08341 GABA(A) receptor-associated protein (A)	Autophagy-related protein 8C OS=Oryza sativa subsp. japonica GN=ATG8C PE=2 SV=1
	Sa0F.898	Sa4F.9	GO:0004096; catalase activity; Molecular Function::GO:0006979; response to oxidative stress; Biological Process::GO:0020037; heme binding; Molecular Function::GO:0055114; oxidation-reduction process; Biological Process	IPR010582; Catalase immune-responsive domain::IPR011614; Catalase core domain::IPR018028; Catalase, mono-functional, haem-containing	CAT, catalase; catalase isozyme 1 (EC:1.11.1.6); K03781 catalase [EC:1.11.1.6] (A)	Catalase-2 OS=Arabidopsis thaliana GN=CAT2 PE=2 SV=3
	Sa0F.898	Sa5F.175	GO:0005215; transporter activity; Molecular Function::GO:0006810; transport; Biological Process::GO:0016020; membrane; Cellular Component	IPR000109; Proton-dependent oligopeptide transporter family	protein NRT1/ PTR FAMILY 4.3; K14638 solute carrier family 15 (peptide/histidine transporter), member 3/4 (A)	Protein NRT1/ PTR FAMILY 4.3 OS=Arabidopsis thaliana GN=NPF4.3 PE=2 SV=1
	Sa0F.898	Sa5F.218	GO:0030001; metal ion transport; Biological Process::GO:0046872; metal ion binding; Molecular Function	IPR006121; Heavy metal-associated domain, HMA	NA	NA
	Sa0F.898	Sa5F.24	GO:0016021; integral to membrane; Cellular Component::GO:0055085; transmembrane transport; Biological Process	IPR004837; Sodium/calcium exchanger membrane region	vacuolar cation/proton exchanger 3-like; K07300 Ca2+:H+ antiporter (A)	Vacuolar cation/proton exchanger 5 OS=Arabidopsis thaliana GN=CAX5 PE=2 SV=1
	Sa0F.898	Sa5F.278	GO:0006633; fatty acid biosynthetic process; Biological Process::GO:0008610; lipid biosynthetic process; Biological Process::GO:0016020; membrane; Cellular Component::GO:0016747; transferase activity, transferring acyl groups other than amino-acyl groups; Molecular Function	IPR013601; FAE1/Type III polyketide synthase-like protein::IPR013747; 3-Oxoacyl-[acyl-carrier-protein (ACP)] synthase III C-terminal	3-ketoacyl-CoA synthase 1; K15397 3-ketoacyl-CoA synthase [EC:2.3.1.199] (A)	3-ketoacyl-CoA synthase 1 OS=Arabidopsis thaliana GN=KCS1 PE=2 SV=1
	Sa0F.898	Sa6F.145	GO:0006812; cation transport; Biological Process::GO:0015299; solute:hydrogen antiporter activity; Molecular Function::GO:0016021; integral to membrane; Cellular Component::GO:0055085; transmembrane transport; Biological Process	IPR006153; Cation/H+ exchanger	NA	Cation/H(+) antiporter 20 OS=Arabidopsis thaliana GN=CHX20 PE=2 SV=1
	Sa0F.898	Sa7F.163	GO:0003700; sequence-specific DNA binding transcription factor activity; Molecular Function::GO:0006355; regulation of transcription, DNA-dependent; Biological Process::GO:0043565; sequence-specific DNA binding; Molecular Function	IPR004827; Basic-leucine zipper domain::IPR020983; Basic leucine-zipper, C-terminal	Os02g0128200; K09060 plant G-box-binding factor (A)	Light-inducible protein CPRF2 OS=Petroselinum crispum GN=CPRF2 PE=2 SV=2
	Sa0F.898	Sa7F.34	GO:0003700; sequence-specific DNA binding transcription factor activity; Molecular Function::GO:0005515; protein binding; Molecular Function::GO:0006355; regulation of transcription, DNA-dependent; Biological Process::GO:0008270; zinc ion binding; Molecular Function::GO:0043565; sequence-specific DNA binding; Molecular Function	IPR000679; Zinc finger, GATA-type::IPR010399; Tify::IPR010402; CCT domain	two-component response regulator-like APRR3; K12129 pseudo-response regulator 7 (A)	GATA transcription factor 24 OS=Arabidopsis thaliana GN=GATA24 PE=2 SV=2
	Sa0F.898	Sa7F.597	GO:0004190; aspartic-type endopeptidase activity; Molecular Function::GO:0006508; proteolysis; Biological Process::GO:0006629; lipid metabolic process; Biological Process	IPR001461; Peptidase A1::IPR007856; Saposin-like type B, 1::IPR008138; Saposin-like type B, 2::IPR008139; Saposin B	Aspartic proteinase precursor, putative (EC:3.4.23.40); K08245 phytepsin [EC:3.4.23.40] (A)	Aspartic proteinase A1 OS=Arabidopsis thaliana GN=APA1 PE=1 SV=1
	Sa0F.898	Sa8F.426	GO:0005525; GTP binding; Molecular Function::GO:0005622; intracellular; Cellular Component::GO:0007264; small GTPase mediated signal transduction; Biological Process::GO:0015031; protein transport; Biological Process	IPR001806; Small GTPase superfamily::IPR003578; Small GTPase superfamily, Rho type::IPR003579; Small GTPase superfamily, Rab type::IPR013684; Mitochondrial Rho-like	septum-promoting GTP-binding protein 1-like; K07976 Rab family, other (A)	Septum-promoting GTP-binding protein 1 OS=Schizosaccharomyces pombe (strain 972 / ATCC 24843) GN=spg1 PE=1 SV=1
	Sa0F.898	Sa8F.88	GO:0003700; sequence-specific DNA binding transcription factor activity; Molecular Function::GO:0006355; regulation of transcription, DNA-dependent; Biological Process::GO:0043565; sequence-specific DNA binding; Molecular Function	IPR003657; DNA-binding WRKY	WRKY22; WRKY transcription factor 22; K13425 WRKY transcription factor 22 (A)	WRKY transcription factor 22 OS=Arabidopsis thaliana GN=WRKY22 PE=2 SV=1
	Sa0F.898	Sa9F.367	GO:0003700; sequence-specific DNA binding transcription factor activity; Molecular Function::GO:0006355; regulation of transcription, DNA-dependent; Biological Process	IPR001471; AP2/ERF domain	ethylene-responsive transcription factor 1B-like; K14516 ethylene-responsive transcription factor 1 (A)	Ethylene-responsive transcription factor 1B OS=Arabidopsis thaliana GN=ERF1B PE=1 SV=2
	Sa0F.898	Sa9F.466.1	GO:0005215; transporter activity; Molecular Function::GO:0005886; plasma membrane; Cellular Component::GO:0016021; integral to membrane; Cellular Component::GO:0055085; transmembrane transport; Biological Process	IPR001958; Tetracycline resistance protein, TetA/multidrug resistance protein MdtG::IPR011701; Major facilitator superfamily::IPR020846; Major facilitator superfamily domain	hypothetical protein; K12818 ATP-dependent RNA helicase DHX8/PRP22 [EC:3.6.4.13] (A)	Protein ZINC INDUCED FACILITATOR-LIKE 1 OS=Arabidopsis thaliana GN=ZIFL1 PE=2 SV=1
	Sa0F.898	Sa9F.519	GO:0003924; GTPase activity; Molecular Function::GO:0005525; GTP binding; Molecular Function::GO:0005622; intracellular; Cellular Component::GO:0006184; GTP catabolic process; Biological Process::GO:0006886; intracellular protein transport; Biological Process::GO:0006913; nucleocytoplasmic transport; Biological Process::GO:0007165; signal transduction; Biological Process::GO:0007264; small GTPase…	IPR001806; Small GTPase superfamily::IPR002041; Ran GTPase::IPR003578; Small GTPase superfamily, Rho type::IPR003579; Small GTPase superfamily, Rab type::IPR020849; Small GTPase superfamily, Ras type	ras-related protein RABE1a-like; K07901 Ras-related protein Rab-8A (A)	Ras-related protein RABE1c OS=Arabidopsis thaliana GN=RABE1C PE=1 SV=1
	Sa0F.898	Sa10F.159	GO:0003700; sequence-specific DNA binding transcription factor activity; Molecular Function::GO:0006355; regulation of transcription, DNA-dependent; Biological Process::GO:0043565; sequence-specific DNA binding; Molecular Function	IPR003657; DNA-binding WRKY	WRKY58; probable WRKY transcription factor 58; K08819 cyclin-dependent kinase 12/13 [EC:2.7.11.22 2.7.11.23] (A)	Probable WRKY transcription factor 4 OS=Arabidopsis thaliana GN=WRKY4 PE=1 SV=2
	Sa0F.898	Sa10F.172	GO:0055085; transmembrane transport; Biological Process	IPR002067; Mitochondrial carrier protein::IPR018108; Mitochondrial substrate/solute carrier	solute carrier family 25 member 44; K15121 solute carrier family 25, member 44 (A)	Solute carrier family 25 member 44 OS=Pongo abelii GN=SLC25A44 PE=2 SV=2
	Sa0F.898	Sa10F.299	GO:0005215; transporter activity; Molecular Function::GO:0006810; transport; Biological Process::GO:0016020; membrane; Cellular Component	IPR000425; Major intrinsic protein	hypothetical protein; K09873 aquaporin TIP (A)	Aquaporin TIP2-3 OS=Arabidopsis thaliana GN=TIP2-3 PE=1 SV=1
	Sa0F.898	Sa10F.349	GO:0005509; calcium ion binding; Molecular Function::GO:0055085; transmembrane transport; Biological Process	IPR002048; EF-hand domain::IPR002067; Mitochondrial carrier protein::IPR011992; EF-hand domain pair::IPR018108; Mitochondrial substrate/solute carrier	calcium-binding mitochondrial carrier protein SCaMC-1-like; K14684 solute carrier family 25 (mitochondrial phosphate transporter), member 23/24/25/41 (A)	Calcium-binding mitochondrial carrier protein SCaMC-1 OS=Xenopus tropicalis GN=slc25a24 PE=2 SV=1
	Sa0F.898	Sa10F.450.1	GO:0005669; transcription factor TFIID complex; Cellular Component::GO:0006352; DNA-dependent transcription, initiation; Biological Process	IPR007900; Transcription initiation factor TFIID component TAF4	transcription initiation factor TFIID subunit 4b-like; K03129 transcription initiation factor TFIID subunit 4 (A)	Transcription initiation factor TFIID subunit 4b OS=Arabidopsis thaliana GN=TAF4B PE=1 SV=1
	Sa0F.898	Sa10F.98	GO:0004857; enzyme inhibitor activity; Molecular Function::GO:0030599; pectinesterase activity; Molecular Function	IPR006501; Pectinesterase inhibitor domain	hypothetical protein; K01051 pectinesterase [EC:3.1.1.11] (A)	21 kDa protein OS=Daucus carota PE=2 SV=1
	Sa0F.898	Sa11F.53	GO:0003700; sequence-specific DNA binding transcription factor activity; Molecular Function::GO:0006355; regulation of transcription, DNA-dependent; Biological Process::GO:0043565; sequence-specific DNA binding; Molecular Function	IPR004827; Basic-leucine zipper domain	transcription factor HY5; K16241 transcription factor HY5 (A)	Transcription factor HY5 OS=Solanum lycopersicum GN=HY5 PE=2 SV=1
	Sa0F.898	Sa12F.129	GO:0008272; sulfate transport; Biological Process::GO:0015116; sulfate transmembrane transporter activity; Molecular Function::GO:0016021; integral to membrane; Cellular Component	IPR002645; STAS domain::IPR011547; Sulphate transporter	sulfate transporter 1.3-like; K17470 sulfate transporter 1, high-affinity (A)	High affinity sulfate transporter 2 OS=Stylosanthes hamata GN=ST2 PE=2 SV=1
	Sa0F.898	Sa12F.136	GO:0015095; magnesium ion transmembrane transporter activity; Molecular Function::GO:0015693; magnesium ion transport; Biological Process	IPR026573; Magnesium transporter MRS2/LPE10	RNA splicing protein mrs2, mitochondrial, putative; K16075 magnesium transporter (A)	Magnesium transporter MRS2-4 OS=Arabidopsis thaliana GN=MRS2-4 PE=2 SV=1
	Sa0F.898	Sa12F.185	GO:0055085; transmembrane transport; Biological Process	IPR002067; Mitochondrial carrier protein::IPR018108; Mitochondrial substrate/solute carrier	mitochondrial carrier protein MTM1; K15119 solute carrier family 25, member 39/40 (A)	Mitochondrial carrier protein MTM1 OS=Arabidopsis thaliana GN=MTM1 PE=2 SV=1
	Sa0F.898	Sa12F.9	GO:0003677; DNA binding; Molecular Function::GO:0003700; sequence-specific DNA binding transcription factor activity; Molecular Function::GO:0005634; nucleus; Cellular Component::GO:0006351; transcription, DNA-dependent; Biological Process::GO:0006355; regulation of transcription, DNA-dependent; Biological Process::GO:0043565; sequence-specific DNA binding; Molecular Function	IPR004827; Basic-leucine zipper domain::IPR012900; G-box binding, MFMR	G-box-binding factor 1; K09060 plant G-box-binding factor (A)	G-box-binding factor 1 OS=Arabidopsis thaliana GN=GBF1 PE=2 SV=2
	Sa0F.898	Sa13F.108	GO:0003924; GTPase activity; Molecular Function::GO:0005525; GTP binding; Molecular Function::GO:0005622; intracellular; Cellular Component::GO:0006184; GTP catabolic process; Biological Process::GO:0006886; intracellular protein transport; Biological Process::GO:0006913; nucleocytoplasmic transport; Biological Process::GO:0007165; signal transduction; Biological Process::GO:0007264; small GTPase…	IPR001806; Small GTPase superfamily::IPR002041; Ran GTPase::IPR003578; Small GTPase superfamily, Rho type::IPR003579; Small GTPase superfamily, Rab type::IPR020849; Small GTPase superfamily, Ras type	RAB GTPase A1C; K07904 Ras-related protein Rab-11A (A)	Ras-related protein RABA1c OS=Arabidopsis thaliana GN=RABA1C PE=2 SV=1
	Sa0F.898	Sa14F.273	GO:0003700; sequence-specific DNA binding transcription factor activity; Molecular Function::GO:0006355; regulation of transcription, DNA-dependent; Biological Process::GO:0043565; sequence-specific DNA binding; Molecular Function	IPR001356; Homeobox domain::IPR002913; START domain	homeobox-leucine zipper protein MERISTEM L1; K09338 homeobox-leucine zipper protein (A)	Homeobox-leucine zipper protein MERISTEM L1 OS=Arabidopsis thaliana GN=ATML1 PE=2 SV=1
	Sa0F.898	Sa15F.407	GO:0004553; hydrolase activity, hydrolyzing O-glycosyl compounds; Molecular Function::GO:0005618; cell wall; Cellular Component::GO:0005975; carbohydrate metabolic process; Biological Process::GO:0006073; cellular glucan metabolic process; Biological Process::GO:0016762; xyloglucan:xyloglucosyl transferase activity; Molecular Function::GO:0048046; apoplast; Cellular Component	IPR000757; Glycoside hydrolase, family 16::IPR010713; Xyloglucan endo-transglycosylase, C-terminal	probable xyloglucan endotransglucosylase/hydrolase protein 30; K08235 xyloglucan:xyloglucosyl transferase [EC:2.4.1.207] (A)	Probable xyloglucan endotransglucosylase/hydrolase protein 30 OS=Arabidopsis thaliana GN=XTH30 PE=2 SV=2
	Sa0F.898	Sa17F.100	GO:0005515; protein binding; Molecular Function::GO:0005543; phospholipid binding; Molecular Function	IPR001849; Pleckstrin homology domain	sbf1, wu:fj45d12, zgc:92634; SET binding factor 1; K18061 myotubularin-related protein 5/13 (A)	Differentially expressed in FDCP 6 homolog OS=Xenopus laevis GN=def6 PE=2 SV=1
	Sa0F.898	Sa17F.32	GO:0005622; intracellular; Cellular Component::GO:0006886; intracellular protein transport; Biological Process	IPR002014; VHS::IPR004152; GAT::IPR018205; VHS subgroup	hepatocyte growth factor-regulated tyrosine kinase substrate-like; K12182 hepatocyte growth factor-regulated tyrosine kinase substrate (A)	TOM1-like protein 2 OS=Mus musculus GN=Tom1l2 PE=2 SV=1
	Sa0F.898	Sa18F.164	GO:0015078; hydrogen ion transmembrane transporter activity; Molecular Function::GO:0015991; ATP hydrolysis coupled proton transport; Biological Process::GO:0033180; proton-transporting V-type ATPase, V1 domain; Cellular Component	IPR004907; ATPase, V1 complex, subunit C	V-type proton ATPase subunit C; K02148 V-type H+-transporting ATPase subunit C (A)	V-type proton ATPase subunit C OS=Arabidopsis thaliana GN=VHA-C PE=1 SV=1
	Sa0F.898	Sa18F.278	GO:0016021; integral to membrane; Cellular Component::GO:0055085; transmembrane transport; Biological Process	IPR004837; Sodium/calcium exchanger membrane region	Vacuolar cation/proton exchanger 1a, putative; K07300 Ca2+:H+ antiporter (A)	Vacuolar cation/proton exchanger 1 OS=Arabidopsis thaliana GN=CAX1 PE=1 SV=3
	Sa0F.898	Sa19F.116	GO:0003677; DNA binding; Molecular Function::GO:0003700; sequence-specific DNA binding transcription factor activity; Molecular Function::GO:0005634; nucleus; Cellular Component::GO:0006355; regulation of transcription, DNA-dependent; Biological Process::GO:0046983; protein dimerization activity; Molecular Function	IPR002100; Transcription factor, MADS-box::IPR002487; Transcription factor, K-box	MADS-box transcription factor 23; K09264 MADS-box transcription factor, plant (A)	Agamous-like MADS-box protein AGL21 OS=Arabidopsis thaliana GN=AGL21 PE=1 SV=1
	Sa0F.898	Sa19F.48	GO:0006952; defense response; Biological Process::GO:0016021; integral to membrane; Cellular Component	IPR004326; Mlo-related protein	MLO protein homolog 1-like; K08472 mlo protein (A)	MLO protein homolog 1 OS=Hordeum vulgare GN=MLO-H1 PE=3 SV=1
	Sa0F.898	Sa20F.144	GO:0006810; transport; Biological Process::GO:0016021; integral to membrane; Cellular Component	IPR009038; GOLD	NA	Transmembrane emp24 domain-containing protein p24delta5 OS=Arabidopsis thaliana GN=At1g21900 PE=1 SV=1
	Sa0F.898	Sa22F.121	GO:0005507; copper ion binding; Molecular Function::GO:0005758; mitochondrial intermembrane space; Cellular Component::GO:0006825; copper ion transport; Biological Process::GO:0016531; copper chaperone activity; Molecular Function	IPR007745; Cytochrome c oxidase copper chaperone	hypothetical protein; K02260 cytochrome c oxidase assembly protein subunit 17 (A)	Cytochrome c oxidase copper chaperone 1 OS=Arabidopsis thaliana GN=COX17-1 PE=2 SV=1
	Sa0F.898	Sa22F.181	GO:0004857; enzyme inhibitor activity; Molecular Function::GO:0005618; cell wall; Cellular Component::GO:0030599; pectinesterase activity; Molecular Function::GO:0042545; cell wall modification; Biological Process	IPR000070; Pectinesterase, catalytic::IPR006501; Pectinesterase inhibitor domain	Pectinesterase/pectinesterase inhibitor PPE8B; K01051 pectinesterase [EC:3.1.1.11] (A)	Pectinesterase/pectinesterase inhibitor PPE8B OS=Prunus persica PE=2 SV=1
	Sa0F.898	Sa22F.181	GO:0004857; enzyme inhibitor activity; Molecular Function::GO:0005618; cell wall; Cellular Component::GO:0030599; pectinesterase activity; Molecular Function::GO:0042545; cell wall modification; Biological Process	IPR000070; Pectinesterase, catalytic::IPR006501; Pectinesterase inhibitor domain	Pectinesterase/pectinesterase inhibitor PPE8B; K01051 pectinesterase [EC:3.1.1.11] (A)	Pectinesterase/pectinesterase inhibitor PPE8B OS=Prunus persica PE=2 SV=1
	Sa0F.898	Sa23F.279	GO:0005525; GTP binding; Molecular Function::GO:0005622; intracellular; Cellular Component::GO:0006886; intracellular protein transport; Biological Process::GO:0007264; small GTPase mediated signal transduction; Biological Process::GO:0015031; protein transport; Biological Process	IPR003579; Small GTPase superfamily, Rab type::IPR006687; Small GTPase superfamily, SAR1-type::IPR006689; Small GTPase superfamily, ARF/SAR type::IPR024156; Small GTPase superfamily, ARF type	hypothetical protein; K07977 Arf/Sar family, other (A)	ADP-ribosylation factor OS=Dugesia japonica PE=2 SV=3
	Sa0F.898	Sa23F.280	GO:0005525; GTP binding; Molecular Function::GO:0005622; intracellular; Cellular Component::GO:0006886; intracellular protein transport; Biological Process::GO:0007264; small GTPase mediated signal transduction; Biological Process::GO:0015031; protein transport; Biological Process	IPR003579; Small GTPase superfamily, Rab type::IPR006687; Small GTPase superfamily, SAR1-type::IPR006689; Small GTPase superfamily, ARF/SAR type::IPR024156; Small GTPase superfamily, ARF type	ADP-ribosylation factor 1-like 2; K07977 Arf/Sar family, other (A)	ADP-ribosylation factor 1 OS=Locusta migratoria GN=ARF1 PE=2 SV=2
	Sa0F.898	Sa23F.88	GO:0004857; enzyme inhibitor activity; Molecular Function::GO:0005618; cell wall; Cellular Component::GO:0030599; pectinesterase activity; Molecular Function::GO:0042545; cell wall modification; Biological Process	IPR000070; Pectinesterase, catalytic::IPR006501; Pectinesterase inhibitor domain	putative pectinesterase/pectinesterase inhibitor 24; K01051 pectinesterase [EC:3.1.1.11] (A)	Probable pectinesterase/pectinesterase inhibitor 46 OS=Arabidopsis thaliana GN=PME46 PE=2 SV=1
	Sa0F.898	Sa23F.88	GO:0004857; enzyme inhibitor activity; Molecular Function::GO:0005618; cell wall; Cellular Component::GO:0030599; pectinesterase activity; Molecular Function::GO:0042545; cell wall modification; Biological Process	IPR000070; Pectinesterase, catalytic::IPR006501; Pectinesterase inhibitor domain	putative pectinesterase/pectinesterase inhibitor 24; K01051 pectinesterase [EC:3.1.1.11] (A)	Probable pectinesterase/pectinesterase inhibitor 46 OS=Arabidopsis thaliana GN=PME46 PE=2 SV=1
	Sa0F.898	Sa24F.127	GO:0006633; fatty acid biosynthetic process; Biological Process::GO:0008610; lipid biosynthetic process; Biological Process::GO:0016020; membrane; Cellular Component::GO:0016747; transferase activity, transferring acyl groups other than amino-acyl groups; Molecular Function	IPR013601; FAE1/Type III polyketide synthase-like protein::IPR013747; 3-Oxoacyl-[acyl-carrier-protein (ACP)] synthase III C-terminal	KCS8; 3-ketoacyl-CoA synthase 10-like; K15397 3-ketoacyl-CoA synthase [EC:2.3.1.199] (A)	3-ketoacyl-CoA synthase 10 OS=Arabidopsis thaliana GN=FDH PE=1 SV=2
	Sa0F.898	Sa24F.238	GO:0005515; protein binding; Molecular Function::GO:0016021; integral to membrane; Cellular Component::GO:0016192; vesicle-mediated transport; Biological Process	IPR001388; Synaptobrevin::IPR001680; WD40 repeat	lethal(2) giant larvae protein homolog SRO77-like; K08518 syntaxin-binding protein 5 (A)	Syntaxin-binding protein 5 OS=Mus musculus GN=Stxbp5 PE=1 SV=3
	Sa0F.898	Sa26F.180	GO:0015031; protein transport; Biological Process	IPR005024; Snf7	POPTRDRAFT_833929; SNF7 family protein; K12198 charged multivesicular body protein 5 (A)	Charged multivesicular body protein 5 OS=Rattus norvegicus GN=Chmp5 PE=2 SV=1
	Sa0F.898	Sa26F.280	GO:0005216; ion channel activity; Molecular Function::GO:0006811; ion transport; Biological Process::GO:0016020; membrane; Cellular Component::GO:0055085; transmembrane transport; Biological Process	IPR000595; Cyclic nucleotide-binding domain::IPR005821; Ion transport domain	cyclic nucleotide-gated ion channel 1-like; K05391 cyclic nucleotide gated channel, other eukaryote (A)	Cyclic nucleotide-gated ion channel 1 OS=Arabidopsis thaliana GN=CNGC1 PE=1 SV=1
	Sa0F.898	Sa27F.133	GO:0003700; sequence-specific DNA binding transcription factor activity; Molecular Function::GO:0006351; transcription, DNA-dependent; Biological Process::GO:0006355; regulation of transcription, DNA-dependent; Biological Process::GO:0043565; sequence-specific DNA binding; Molecular Function	IPR004827; Basic-leucine zipper domain::IPR025422; Transcription factor TGA like domain	BZIP transcription factor family protein isoform 1; K14431 transcription factor TGA (A)	Transcription factor TGA4 OS=Arabidopsis thaliana GN=TGA4 PE=1 SV=2
	Sa0F.898	Sa28F.159	GO:0003677; DNA binding; Molecular Function::GO:0003700; sequence-specific DNA binding transcription factor activity; Molecular Function::GO:0005634; nucleus; Cellular Component::GO:0006355; regulation of transcription, DNA-dependent; Biological Process::GO:0046983; protein dimerization activity; Molecular Function	IPR002100; Transcription factor, MADS-box::IPR002487; Transcription factor, K-box	MADS-box transcription factor 23-like; K09264 MADS-box transcription factor, plant (A)	MADS-box transcription factor 27 OS=Oryza sativa subsp. japonica GN=MADS27 PE=2 SV=2
	Sa0F.898	Sa28F.50	GO:0003677; DNA binding; Molecular Function::GO:0003700; sequence-specific DNA binding transcription factor activity; Molecular Function::GO:0006355; regulation of transcription, DNA-dependent; Biological Process::GO:0043565; sequence-specific DNA binding; Molecular Function	IPR001356; Homeobox domain::IPR006563; POX domain::IPR008422; Homeobox KN domain	homeobox protein BEL1 homolog; K16670 homeobox protein Meis2 (A)	BEL1-like homeodomain protein 7 OS=Arabidopsis thaliana GN=BLH7 PE=2 SV=1
	Sa0F.898	Sa28F.95	GO:0000976; transcription regulatory region sequence-specific DNA binding; Molecular Function::GO:0003677; DNA binding; Molecular Function::GO:0003700; sequence-specific DNA binding transcription factor activity; Molecular Function::GO:0005634; nucleus; Cellular Component::GO:0006355; regulation of transcription, DNA-dependent; Biological Process::GO:0043565; sequence-specific DNA binding; Molecu…	IPR000047; Helix-turn-helix motif::IPR001356; Homeobox domain::IPR003106; Leucine zipper, homeobox-associated::IPR006712; HD-ZIP protein, N-terminal	homeobox-leucine zipper family protein; K09338 homeobox-leucine zipper protein (A)	Homeobox-leucine zipper protein HAT4 OS=Arabidopsis thaliana GN=HAT4 PE=1 SV=1
	Sa0F.898	Sa29F.188.1	GO:0006629; lipid metabolic process; Biological Process::GO:0016788; hydrolase activity, acting on ester bonds; Molecular Function	IPR001087; Lipase, GDSL	hypothetical protein; K00679 phospholipid:diacylglycerol acyltransferase [EC:2.3.1.158] (A)	GDSL esterase/lipase APG OS=Arabidopsis thaliana GN=APG PE=1 SV=1
	Sa0F.898	Sa30F.189	GO:0003677; DNA binding; Molecular Function::GO:0003700; sequence-specific DNA binding transcription factor activity; Molecular Function::GO:0006352; DNA-dependent transcription, initiation; Biological Process::GO:0006355; regulation of transcription, DNA-dependent; Biological Process::GO:0016987; sigma factor activity; Molecular Function	IPR000943; RNA polymerase sigma-70::IPR007624; RNA polymerase sigma-70 region 3::IPR007627; RNA polymerase sigma-70 region 2::IPR007630; RNA polymerase sigma-70 region 4	hypothetical protein; K03093 RNA polymerase sigma factor (A)	RNA polymerase sigma factor sigC OS=Arabidopsis thaliana GN=SIGC PE=2 SV=1
	Sa0F.898	Sa33F.239	GO:0003677; DNA binding; Molecular Function::GO:0003700; sequence-specific DNA binding transcription factor activity; Molecular Function::GO:0005634; nucleus; Cellular Component::GO:0006355; regulation of transcription, DNA-dependent; Biological Process::GO:0046983; protein dimerization activity; Molecular Function	IPR002100; Transcription factor, MADS-box::IPR002487; Transcription factor, K-box::IPR020158; Protein of unknown function DUF2756	MADS-box transcription factor 23-like; K09264 MADS-box transcription factor, plant (A)	Agamous-like MADS-box protein AGL21 OS=Arabidopsis thaliana GN=AGL21 PE=1 SV=1
	Sa0F.898	Sa33F.28	GO:0006952; defense response; Biological Process::GO:0009607; response to biotic stimulus; Biological Process	IPR000916; Bet v I domain::IPR024948; Major latex protein domain::IPR024949; Bet v I type allergen	abscisic acid receptor PYL6-like; K14496 abscisic acid receptor PYR/PYL family (A)	MLP-like protein 423 OS=Arabidopsis thaliana GN=MLP423 PE=2 SV=1
	Sa0F.898	Sa34F.128	GO:0016020; membrane; Cellular Component::GO:0055085; transmembrane transport; Biological Process	IPR006685; Mechanosensitive ion channel MscS	NA	Mechanosensitive ion channel protein 10 OS=Arabidopsis thaliana GN=MSL10 PE=1 SV=1
	Sa0F.898	Sa34F.33	GO:0016021; integral to membrane; Cellular Component::GO:0016192; vesicle-mediated transport; Biological Process	IPR001388; Synaptobrevin::IPR010908; Longin domain	VAMP-like protein YKT61; K08516 synaptobrevin homolog YKT6 (A)	VAMP-like protein YKT61 OS=Arabidopsis thaliana GN=YKT61 PE=2 SV=1
	Sa0F.898	Sa35F.13	GO:0003924; GTPase activity; Molecular Function::GO:0005525; GTP binding; Molecular Function::GO:0005622; intracellular; Cellular Component::GO:0006184; GTP catabolic process; Biological Process::GO:0006886; intracellular protein transport; Biological Process::GO:0006913; nucleocytoplasmic transport; Biological Process::GO:0007165; signal transduction; Biological Process::GO:0007264; small GTPase…	IPR001806; Small GTPase superfamily::IPR002041; Ran GTPase::IPR003578; Small GTPase superfamily, Rho type::IPR003579; Small GTPase superfamily, Rab type::IPR020849; Small GTPase superfamily, Ras type	POPTRDRAFT_800974; Ras-related GTP-binding family protein; K07893 Ras-related protein Rab-6A (A)	Ras-related protein RABH1e OS=Arabidopsis thaliana GN=RABH1E PE=2 SV=1
	Sa0F.898	Sa38F.192	GO:0004221; ubiquitin thiolesterase activity; Molecular Function::GO:0006511; ubiquitin-dependent protein catabolic process; Biological Process	IPR001394; Ubiquitin carboxyl-terminal hydrolases family 2	ubiquitin carboxyl-terminal hydrolase 3; K11842 ubiquitin carboxyl-terminal hydrolase 12/46 [EC:3.4.19.12] (A)	Ubiquitin carboxyl-terminal hydrolase 4 OS=Arabidopsis thaliana GN=UBP4 PE=1 SV=2
	Sa0F.898	Sa38F.293	GO:0004221; ubiquitin thiolesterase activity; Molecular Function::GO:0005515; protein binding; Molecular Function::GO:0006511; ubiquitin-dependent protein catabolic process; Biological Process	IPR000626; Ubiquitin domain::IPR001394; Ubiquitin carboxyl-terminal hydrolases family 2::IPR019955; Ubiquitin supergroup	ubiquitin carboxyl-terminal hydrolase 6; K11843 ubiquitin carboxyl-terminal hydrolase 14 [EC:3.4.19.12] (A)	Ubiquitin carboxyl-terminal hydrolase 6 OS=Arabidopsis thaliana GN=UBP6 PE=1 SV=1
	Sa0F.898	Sa38F.75	GO:0003677; DNA binding; Molecular Function::GO:0003700; sequence-specific DNA binding transcription factor activity; Molecular Function::GO:0005634; nucleus; Cellular Component::GO:0006355; regulation of transcription, DNA-dependent; Biological Process::GO:0046983; protein dimerization activity; Molecular Function	IPR002100; Transcription factor, MADS-box::IPR002487; Transcription factor, K-box	agamous-like MADS-box protein AGL1; K09264 MADS-box transcription factor, plant (A)	MADS-box protein SVP OS=Arabidopsis thaliana GN=SVP PE=1 SV=1
	Sa0F.898	Sa40F.30	GO:0005750; mitochondrial respiratory chain complex III; Cellular Component::GO:0006122; mitochondrial electron transport, ubiquinol to cytochrome c; Biological Process	IPR003197; Cytochrome b-c1 complex subunit 7	cytochrome b-c1 complex subunit 7-2; K00417 ubiquinol-cytochrome c reductase subunit 7 (A)	Cytochrome b-c1 complex subunit 7-2 OS=Arabidopsis thaliana GN=QCR7-2 PE=1 SV=1
	Sa0F.898	Sa43F.91	GO:0006950; response to stress; Biological Process	IPR006015; Universal stress protein A::IPR006016; UspA	probable fructokinase-1; K00847 fructokinase [EC:2.7.1.4] (A)	Universal stress protein A-like protein OS=Arabidopsis thaliana GN=At3g01520 PE=1 SV=2
	Sa0F.898	Sa44F.163	GO:0003700; sequence-specific DNA binding transcription factor activity; Molecular Function::GO:0006351; transcription, DNA-dependent; Biological Process::GO:0006355; regulation of transcription, DNA-dependent; Biological Process::GO:0043565; sequence-specific DNA binding; Molecular Function	IPR004827; Basic-leucine zipper domain::IPR025422; Transcription factor TGA like domain	transcription factor HBP-1b(c38)-like; K14431 transcription factor TGA (A)	TGACG-sequence-specific DNA-binding protein TGA-2.1 OS=Nicotiana tabacum GN=TGA21 PE=1 SV=1
	Sa0F.898	Sa44F.212	GO:0003700; sequence-specific DNA binding transcription factor activity; Molecular Function::GO:0006355; regulation of transcription, DNA-dependent; Biological Process::GO:0043565; sequence-specific DNA binding; Molecular Function	IPR001356; Homeobox domain::IPR002913; START domain	homeobox-leucine zipper protein GLABRA 2-like; K09338 homeobox-leucine zipper protein (A)	Homeobox-leucine zipper protein GLABRA 2 OS=Arabidopsis thaliana GN=GL2 PE=2 SV=3
	Sa0F.898	Sa47F.35	GO:0016021; integral to membrane; Cellular Component::GO:0055085; transmembrane transport; Biological Process	IPR011701; Major facilitator superfamily::IPR020846; Major facilitator superfamily domain	high-affinity nitrate transporter 2.1-like; K02575 MFS transporter, NNP family, nitrate/nitrite transporter (A)	High-affinity nitrate transporter 2.1 OS=Arabidopsis thaliana GN=NRT2.1 PE=1 SV=1
	Sa0F.898	Sa49F.106	GO:0016301; kinase activity; Molecular Function::GO:0046474; glycerophospholipid biosynthetic process; Biological Process	IPR026712; Choline/Ethanolamine kinase	probable choline kinase 1; K14156 choline/ethanolamine kinase [EC:2.7.1.32 2.7.1.82] (A)	Probable choline kinase 2 OS=Arabidopsis thaliana GN=At1g74320 PE=2 SV=1
	Sa0F.898	Sa49F.56	GO:0003700; sequence-specific DNA binding transcription factor activity; Molecular Function::GO:0006355; regulation of transcription, DNA-dependent; Biological Process	IPR001471; AP2/ERF domain	ethylene-responsive transcription factor RAP2-4; K09286 EREBP-like factor (A)	Ethylene-responsive transcription factor RAP2-4 OS=Arabidopsis thaliana GN=RAP2-4 PE=1 SV=1
	Sa0F.898	Sa52F.65	GO:0003700; sequence-specific DNA binding transcription factor activity; Molecular Function::GO:0006355; regulation of transcription, DNA-dependent; Biological Process	IPR001471; AP2/ERF domain	ethylene-responsive transcription factor RAP2-7-like; K09284 AP2-like factor, euAP2 lineage (A)	Floral homeotic protein APETALA 2 OS=Arabidopsis thaliana GN=AP2 PE=1 SV=1
	Sa0F.898	Sa54F.56	GO:0016021; integral to membrane; Cellular Component::GO:0055085; transmembrane transport; Biological Process	IPR004776; Auxin efflux carrier	POPTRDRAFT_760338; auxin efflux carrier family protein; K07088 uncharacterized protein (A)	Uncharacterized transporter C5D6.04 OS=Schizosaccharomyces pombe (strain 972 / ATCC 24843) GN=SPAC5D6.04 PE=3 SV=1
	Sa0F.898	Sa55F.243	GO:0016021; integral to membrane; Cellular Component::GO:0055085; transmembrane transport; Biological Process	IPR004776; Auxin efflux carrier	probable auxin efflux carrier component 1b; K13947 auxin efflux carrier family (A)	Probable auxin efflux carrier component 1c OS=Oryza sativa subsp. japonica GN=PIN1C PE=2 SV=1
	Sa0F.898	Sa56F.37	GO:0016020; membrane; Cellular Component::GO:0048193; Golgi vesicle transport; Biological Process	IPR015260; Syntaxin 6, N-terminal	syntaxin-61; K08498 syntaxin 6 (A)	NA
	Sa0F.898	Sa59F.12	GO:0003677; DNA binding; Molecular Function::GO:0003700; sequence-specific DNA binding transcription factor activity; Molecular Function::GO:0005634; nucleus; Cellular Component::GO:0006355; regulation of transcription, DNA-dependent; Biological Process::GO:0046983; protein dimerization activity; Molecular Function	IPR002100; Transcription factor, MADS-box::IPR002487; Transcription factor, K-box	truncated transcription factor CAULIFLOWER A-like; K09264 MADS-box transcription factor, plant (A)	Agamous-like MADS-box protein AGL12 OS=Arabidopsis thaliana GN=AGL12 PE=2 SV=2
	Sa0F.898	Sa60F.130	GO:0005509; calcium ion binding; Molecular Function::GO:0055085; transmembrane transport; Biological Process	IPR002048; EF-hand domain::IPR002067; Mitochondrial carrier protein::IPR011992; EF-hand domain pair::IPR018108; Mitochondrial substrate/solute carrier	calcium-binding mitochondrial carrier protein SCaMC-1-like; K14684 solute carrier family 25 (mitochondrial phosphate transporter), member 23/24/25/41 (A)	Calcium-binding mitochondrial carrier protein SCaMC-3 OS=Homo sapiens GN=SLC25A23 PE=1 SV=2
	Sa0F.898	Sa60F.179	GO:0015079; potassium ion transmembrane transporter activity; Molecular Function::GO:0016020; membrane; Cellular Component::GO:0071805; potassium ion transmembrane transport; Biological Process	IPR003855; K+ potassium transporter	POPTRDRAFT_805055; potassium transporter 12 family protein; K03549 KUP system potassium uptake protein (A)	Putative potassium transporter 12 OS=Arabidopsis thaliana GN=POT12 PE=1 SV=2
	Sa0F.898	Sa65F.12	GO:0004190; aspartic-type endopeptidase activity; Molecular Function::GO:0006508; proteolysis; Biological Process::GO:0006629; lipid metabolic process; Biological Process	IPR001461; Peptidase A1::IPR007856; Saposin-like type B, 1::IPR008138; Saposin-like type B, 2::IPR008139; Saposin B	POPTRDRAFT_834438; aspartic proteinase 2; K08245 phytepsin [EC:3.4.23.40] (A)	Aspartic proteinase A1 OS=Arabidopsis thaliana GN=APA1 PE=1 SV=1
	Sa0F.898	Sa69F.139	GO:0016020; membrane; Cellular Component::GO:0055085; transmembrane transport; Biological Process	IPR006685; Mechanosensitive ion channel MscS	protein kinase, putative (EC:2.7.10.2); K17535 serine/threonine-protein kinase TNNI3K [EC:2.7.11.1] (A)	Mechanosensitive ion channel protein 10 OS=Arabidopsis thaliana GN=MSL10 PE=1 SV=1
	Sa0F.898	Sa70F.89	GO:0003924; GTPase activity; Molecular Function::GO:0005525; GTP binding; Molecular Function::GO:0005622; intracellular; Cellular Component::GO:0006184; GTP catabolic process; Biological Process::GO:0006886; intracellular protein transport; Biological Process::GO:0006913; nucleocytoplasmic transport; Biological Process::GO:0007165; signal transduction; Biological Process::GO:0007264; small GTPase…	IPR001806; Small GTPase superfamily::IPR002041; Ran GTPase::IPR003578; Small GTPase superfamily, Rho type::IPR003579; Small GTPase superfamily, Rab type::IPR020849; Small GTPase superfamily, Ras type	ras-related protein RABA1f; K07904 Ras-related protein Rab-11A (A)	Ras-related protein RABA1f OS=Arabidopsis thaliana GN=RABA1F PE=2 SV=1
	Sa0F.898	Sa72F.104	GO:0005525; GTP binding; Molecular Function::GO:0005622; intracellular; Cellular Component::GO:0006886; intracellular protein transport; Biological Process::GO:0007264; small GTPase mediated signal transduction; Biological Process::GO:0015031; protein transport; Biological Process	IPR003579; Small GTPase superfamily, Rab type::IPR006687; Small GTPase superfamily, SAR1-type::IPR006689; Small GTPase superfamily, ARF/SAR type::IPR024156; Small GTPase superfamily, ARF type	ADP-ribosylation factor-like protein 5; K07950 ADP-ribosylation factor-like protein 5B (A)	ADP-ribosylation factor-like protein 5 OS=Dictyostelium discoideum GN=arl5 PE=3 SV=1
	Sa0F.898	Sa76F.170	GO:0003700; sequence-specific DNA binding transcription factor activity; Molecular Function::GO:0006355; regulation of transcription, DNA-dependent; Biological Process	IPR001471; AP2/ERF domain	hypothetical protein; K09286 EREBP-like factor (A)	Ethylene-responsive transcription factor ERF012 OS=Arabidopsis thaliana GN=ERF012 PE=2 SV=1
	Sa0F.898	Sa76F.29	GO:0006855; drug transmembrane transport; Biological Process::GO:0015238; drug transmembrane transporter activity; Molecular Function::GO:0015297; antiporter activity; Molecular Function::GO:0016020; membrane; Cellular Component::GO:0055085; transmembrane transport; Biological Process	IPR002528; Multi antimicrobial extrusion protein	MATE efflux family protein 8-like; K03327 multidrug resistance protein, MATE family (A)	MATE efflux family protein 9 OS=Arabidopsis thaliana GN=DTXL5 PE=2 SV=1
	Sa0F.898	Sa79F.158	GO:0003677; DNA binding; Molecular Function::GO:0003700; sequence-specific DNA binding transcription factor activity; Molecular Function::GO:0006355; regulation of transcription, DNA-dependent; Biological Process::GO:0043565; sequence-specific DNA binding; Molecular Function	IPR001356; Homeobox domain::IPR006563; POX domain::IPR008422; Homeobox KN domain	homeobox protein BEL1 homolog; K16670 homeobox protein Meis2 (A)	BEL1-like homeodomain protein 7 OS=Arabidopsis thaliana GN=BLH7 PE=2 SV=1
	Sa0F.898	Sa81F.40	GO:0005750; mitochondrial respiratory chain complex III; Cellular Component::GO:0006122; mitochondrial electron transport, ubiquinol to cytochrome c; Biological Process	IPR003197; Cytochrome b-c1 complex subunit 7	POPTRDRAFT_813950; putative ubiquinol-cytochrome c reductase family protein; K00417 ubiquinol-cytochrome c reductase subunit 7 (A)	Cytochrome b-c1 complex subunit 7-2 OS=Arabidopsis thaliana GN=QCR7-2 PE=1 SV=1
	Sa0F.898	Sa83F.85	GO:0016020; membrane; Cellular Component::GO:0016021; integral to membrane; Cellular Component::GO:0022857; transmembrane transporter activity; Molecular Function::GO:0022891; substrate-specific transmembrane transporter activity; Molecular Function::GO:0055085; transmembrane transport; Biological Process	IPR003663; Sugar/inositol transporter::IPR005828; General substrate transporter	sugar porter (SP) family MFS transporter; K08150 MFS transporter, SP family, solute carrier family 2 (myo-inositol transporter), member 13 (A)	Monosaccharide-sensing protein 2 OS=Arabidopsis thaliana GN=MSSP2 PE=1 SV=2
	Sa0F.898	Sa88F.80	GO:0015031; protein transport; Biological Process::GO:0016021; integral to membrane; Cellular Component	IPR007273; SCAMP	hypothetical protein; K19995 secretory carrier-associated membrane protein (A)	Secretory carrier-associated membrane protein 3 OS=Arabidopsis thaliana GN=SCAMP3 PE=1 SV=1
	Sa0F.898	Sa89F.38	GO:0055085; transmembrane transport; Biological Process	IPR004813; Oligopeptide transporter, OPT superfamily	NA	Oligopeptide transporter 7 OS=Arabidopsis thaliana GN=OPT7 PE=2 SV=1
	Sa0F.898	Sa89F.39	GO:0055085; transmembrane transport; Biological Process	IPR004813; Oligopeptide transporter, OPT superfamily	NA	Oligopeptide transporter 7 OS=Arabidopsis thaliana GN=OPT7 PE=2 SV=1
	Sa0F.898	Sa92F.66	GO:0003700; sequence-specific DNA binding transcription factor activity; Molecular Function::GO:0006355; regulation of transcription, DNA-dependent; Biological Process::GO:0043565; sequence-specific DNA binding; Molecular Function	IPR003657; DNA-binding WRKY	probable WRKY transcription factor 26; K13424 WRKY transcription factor 33 (A)	Probable WRKY transcription factor 61 OS=Arabidopsis thaliana GN=WRKY61 PE=2 SV=1
	Sa0F.898	Sa95F.52	GO:0005783; endoplasmic reticulum; Cellular Component::GO:0006886; intracellular protein transport; Biological Process::GO:0016021; integral to membrane; Cellular Component	IPR008417; B-cell receptor-associated 31-like	hypothetical protein; K14009 B-cell receptor-associated protein 31 (A)	B-cell receptor-associated protein 31 OS=Homo sapiens GN=BCAP31 PE=1 SV=3
	Sa0F.898	Sa96F.10	GO:0006814; sodium ion transport; Biological Process::GO:0008508; bile acid:sodium symporter activity; Molecular Function::GO:0016020; membrane; Cellular Component	IPR002657; Bile acid:sodium symporter	hypothetical protein; K03453 bile acid:Na+ symporter, BASS family (A)	Sodium/pyruvate cotransporter BASS2, chloroplastic OS=Arabidopsis thaliana GN=BASS2 PE=2 SV=1
	Sa0F.898	Sa98F.40	GO:0000166; nucleotide binding; Molecular Function::GO:0006812; cation transport; Biological Process::GO:0016021; integral to membrane; Cellular Component::GO:0019829; cation-transporting ATPase activity; Molecular Function::GO:0030001; metal ion transport; Biological Process::GO:0046872; metal ion binding; Molecular Function	IPR001757; Cation-transporting P-type ATPase::IPR006121; Heavy metal-associated domain, HMA::IPR008250; P-type ATPase, A domain::IPR023214; HAD-like domain::IPR027265; Divalent cation-transporting P-type ATPase	hypothetical protein; K01534 Cd2+/Zn2+-exporting ATPase [EC:3.6.3.3 3.6.3.5] (A)	Cadmium/zinc-transporting ATPase HMA2 OS=Arabidopsis thaliana GN=HMA2 PE=2 SV=1
	Sa0F.898	Sa99F.123	GO:0003700; sequence-specific DNA binding transcription factor activity; Molecular Function::GO:0006355; regulation of transcription, DNA-dependent; Biological Process::GO:0043565; sequence-specific DNA binding; Molecular Function	IPR003657; DNA-binding WRKY	WRKY transcription factor 22; K13425 WRKY transcription factor 22 (A)	WRKY transcription factor 22 OS=Arabidopsis thaliana GN=WRKY22 PE=2 SV=1
	Sa0F.898	Sa99F.163	GO:0006952; defense response; Biological Process::GO:0016021; integral to membrane; Cellular Component	IPR004326; Mlo-related protein	MLO-like protein 6; K08472 mlo protein (A)	MLO-like protein 6 OS=Arabidopsis thaliana GN=MLO6 PE=2 SV=2
	Sa0F.898	Sa100F.89	GO:0003700; sequence-specific DNA binding transcription factor activity; Molecular Function::GO:0006355; regulation of transcription, DNA-dependent; Biological Process	IPR001471; AP2/ERF domain	ethylene-responsive transcription factor RAP2-4; K09286 EREBP-like factor (A)	Ethylene-responsive transcription factor RAP2-4 OS=Arabidopsis thaliana GN=RAP2-4 PE=1 SV=1
	Sa0F.898	Sa102F.24	GO:0006629; lipid metabolic process; Biological Process	IPR002641; Patatin/Phospholipase A2-related	patatin-like phospholipase domain-containing protein 2; K16816 patatin-like phospholipase domain-containing protein 2 [EC:3.1.1.3] (A)	Patatin-like phospholipase domain-containing protein 4 OS=Homo sapiens GN=PNPLA4 PE=2 SV=3
	Sa0F.898	Sa106F.105	GO:0004601; peroxidase activity; Molecular Function::GO:0006979; response to oxidative stress; Biological Process::GO:0020037; heme binding; Molecular Function::GO:0055114; oxidation-reduction process; Biological Process	IPR000823; Plant peroxidase::IPR002016; Haem peroxidase, plant/fungal/bacterial	peroxidase 11; K00430 peroxidase [EC:1.11.1.7] (A)	Peroxidase 11 OS=Arabidopsis thaliana GN=PER11 PE=1 SV=1
	Sa0F.898	Sa109F.26	GO:0016021; integral to membrane; Cellular Component::GO:0055085; transmembrane transport; Biological Process	IPR011701; Major facilitator superfamily::IPR020846; Major facilitator superfamily domain	hypothetical protein; K08193 MFS transporter, ACS family, solute carrier family 17 (sodium-dependent inorganic phosphate cotransporter), other (A)	Ascorbate transporter, chloroplastic OS=Arabidopsis thaliana GN=PHT4;4 PE=1 SV=1
	Sa0F.898	Sa110F.53	GO:0016020; membrane; Cellular Component::GO:0016021; integral to membrane; Cellular Component::GO:0022857; transmembrane transporter activity; Molecular Function::GO:0022891; substrate-specific transmembrane transporter activity; Molecular Function::GO:0055085; transmembrane transport; Biological Process	IPR003663; Sugar/inositol transporter::IPR005828; General substrate transporter::IPR020846; Major facilitator superfamily domain	Major facilitator superfamily protein isoform 1; K08145 MFS transporter, SP family, solute carrier family 2 (facilitated glucose transporter), member 8 (A)	Sugar transporter ERD6-like 7 OS=Arabidopsis thaliana GN=At2g48020 PE=2 SV=2
	Sa0F.898	Sa110F.59	GO:0016020; membrane; Cellular Component::GO:0016021; integral to membrane; Cellular Component::GO:0022857; transmembrane transporter activity; Molecular Function::GO:0022891; substrate-specific transmembrane transporter activity; Molecular Function::GO:0055085; transmembrane transport; Biological Process	IPR003663; Sugar/inositol transporter::IPR005828; General substrate transporter::IPR020846; Major facilitator superfamily domain	inositol transporter 1; K08150 MFS transporter, SP family, solute carrier family 2 (myo-inositol transporter), member 13 (A)	D-xylose-proton symporter-like 2 OS=Arabidopsis thaliana GN=At5g17010 PE=1 SV=1
	Sa0F.898	Sa112F.112	GO:0003700; sequence-specific DNA binding transcription factor activity; Molecular Function::GO:0006351; transcription, DNA-dependent; Biological Process::GO:0006355; regulation of transcription, DNA-dependent; Biological Process::GO:0043565; sequence-specific DNA binding; Molecular Function	IPR004827; Basic-leucine zipper domain::IPR025422; Transcription factor TGA like domain	BZIP transcription factor family protein isoform 1; K14431 transcription factor TGA (A)	Transcription factor TGA4 OS=Arabidopsis thaliana GN=TGA4 PE=1 SV=2
	Sa0F.898	Sa126F.124	GO:0003924; GTPase activity; Molecular Function::GO:0005525; GTP binding; Molecular Function::GO:0005622; intracellular; Cellular Component::GO:0006184; GTP catabolic process; Biological Process::GO:0006886; intracellular protein transport; Biological Process::GO:0006913; nucleocytoplasmic transport; Biological Process::GO:0007165; signal transduction; Biological Process::GO:0007264; small GTPase…	IPR001806; Small GTPase superfamily::IPR002041; Ran GTPase::IPR003578; Small GTPase superfamily, Rho type::IPR003579; Small GTPase superfamily, Rab type::IPR020849; Small GTPase superfamily, Ras type::IPR024156; Small GTPase superfamily, ARF type	ras-related protein Rab2BV; K07904 Ras-related protein Rab-11A (A)	Ras-related protein Rab2BV OS=Beta vulgaris GN=RAB2BV PE=2 SV=1
	Sa0F.898	Sa143F.62	GO:0015078; hydrogen ion transmembrane transporter activity; Molecular Function::GO:0015991; ATP hydrolysis coupled proton transport; Biological Process::GO:0033179; proton-transporting V-type ATPase, V0 domain; Cellular Component	IPR002490; ATPase, V0 complex, subunit 116kDa	hypothetical protein; K02154 V-type H+-transporting ATPase subunit a (A)	V-type proton ATPase subunit a3 OS=Arabidopsis thaliana GN=VHA-a3 PE=1 SV=1
	Sa0F.898	Sa148F.36	GO:0006812; cation transport; Biological Process::GO:0008324; cation transmembrane transporter activity; Molecular Function::GO:0016021; integral to membrane; Cellular Component::GO:0055085; transmembrane transport; Biological Process	IPR002524; Cation efflux protein	Metal tolerance protein B1, putative isoform 1; K14689 solute carrier family 30 (zinc transporter), member 2 (A)	Metal tolerance protein B OS=Arabidopsis thaliana GN=MTPB PE=2 SV=1
	Sa0F.898	Sa148F.6	GO:0008610; lipid biosynthetic process; Biological Process	IPR003333; Mycolic acid cyclopropane synthase	(S)-coclaurine N-methyltransferase; K13384 (S)-coclaurine N-methyltransferase [EC:2.1.1.140] (A)	(S)-coclaurine N-methyltransferase OS=Thalictrum flavum subsp. glaucum PE=1 SV=1
	Sa0F.898	Sa161F.43	GO:0005215; transporter activity; Molecular Function::GO:0006810; transport; Biological Process::GO:0016020; membrane; Cellular Component::GO:0055085; transmembrane transport; Biological Process	IPR006043; Xanthine/uracil/vitamin C permease	adenine/guanine permease AZG1-like; K06901 putative MFS transporter, AGZA family, xanthine/uracil permease (A)	Adenine/guanine permease AZG1 OS=Arabidopsis thaliana GN=AZG1 PE=2 SV=1
	Sa0F.898	Sa164F.45	GO:0000139; Golgi membrane; Cellular Component::GO:0005801; cis-Golgi network; Cellular Component::GO:0006888; ER to Golgi vesicle-mediated transport; Biological Process::GO:0016021; integral to membrane; Cellular Component	IPR023601; Golgi SNAP receptor complex, subunit 1	Golgi SNAP receptor complex member 1-1; K08495 golgi SNAP receptor complex member 1 (A)	Golgi SNAP receptor complex member 1-1 OS=Arabidopsis thaliana GN=GOS11 PE=2 SV=1
	Sa0F.898	Sa175F.32	GO:0005525; GTP binding; Molecular Function::GO:0005622; intracellular; Cellular Component::GO:0006886; intracellular protein transport; Biological Process::GO:0007264; small GTPase mediated signal transduction; Biological Process::GO:0015031; protein transport; Biological Process	IPR003579; Small GTPase superfamily, Rab type::IPR006687; Small GTPase superfamily, SAR1-type::IPR006689; Small GTPase superfamily, ARF/SAR type::IPR024156; Small GTPase superfamily, ARF type	ADP-ribosylation factor-like protein 5; K07950 ADP-ribosylation factor-like protein 5B (A)	ADP-ribosylation factor-like protein 5 OS=Dictyostelium discoideum GN=arl5 PE=3 SV=1
	Sa0F.898	Sa262F.7	GO:0006071; glycerol metabolic process; Biological Process::GO:0008889; glycerophosphodiester phosphodiesterase activity; Molecular Function	IPR004129; Glycerophosphoryl diester phosphodiesterase	POPTRDRAFT_753230; glycerophosphoryl diester phosphodiesterase family protein; K01126 glycerophosphoryl diester phosphodiesterase [EC:3.1.4.46] (A)	Glycerophosphodiester phosphodiesterase GDPDL3 OS=Arabidopsis thaliana GN=GDPDL3 PE=1 SV=3
	Sa3F.554	Sa3F.578	GO:0006869; lipid transport; Biological Process::GO:0008289; lipid binding; Molecular Function	IPR000528; Plant lipid transfer protein/Par allergen::IPR016140; Bifunctional inhibitor/plant lipid transfer protein/seed storage helical domain	NA	Non-specific lipid-transfer protein-like protein At2g13820 OS=Arabidopsis thaliana GN=At2g13820 PE=1 SV=1
	Sa3F.554	Sa3F.578	GO:0006869; lipid transport; Biological Process::GO:0008289; lipid binding; Molecular Function	IPR000528; Plant lipid transfer protein/Par allergen::IPR016140; Bifunctional inhibitor/plant lipid transfer protein/seed storage helical domain	NA	Non-specific lipid-transfer protein-like protein At2g13820 OS=Arabidopsis thaliana GN=At2g13820 PE=1 SV=1
	Sa3F.554	Sa4F.391	GO:0006914; autophagy; Biological Process::GO:0015031; protein transport; Biological Process::GO:0032258; CVT pathway; Biological Process	IPR004241; Autophagy-related protein Atg8 family::IPR027731; Autophagy-related protein 8	uncharacterized LOC100527884; K08341 GABA(A) receptor-associated protein (A)	Autophagy-related protein 8C OS=Oryza sativa subsp. japonica GN=ATG8C PE=2 SV=1
	Sa3F.554	Sa5F.218	GO:0030001; metal ion transport; Biological Process::GO:0046872; metal ion binding; Molecular Function	IPR006121; Heavy metal-associated domain, HMA	NA	NA
	Sa3F.554	Sa5F.24	GO:0016021; integral to membrane; Cellular Component::GO:0055085; transmembrane transport; Biological Process	IPR004837; Sodium/calcium exchanger membrane region	vacuolar cation/proton exchanger 3-like; K07300 Ca2+:H+ antiporter (A)	Vacuolar cation/proton exchanger 5 OS=Arabidopsis thaliana GN=CAX5 PE=2 SV=1
	Sa3F.554	Sa6F.145	GO:0006812; cation transport; Biological Process::GO:0015299; solute:hydrogen antiporter activity; Molecular Function::GO:0016021; integral to membrane; Cellular Component::GO:0055085; transmembrane transport; Biological Process	IPR006153; Cation/H+ exchanger	NA	Cation/H(+) antiporter 20 OS=Arabidopsis thaliana GN=CHX20 PE=2 SV=1
	Sa3F.554	Sa10F.349	GO:0005509; calcium ion binding; Molecular Function::GO:0055085; transmembrane transport; Biological Process	IPR002048; EF-hand domain::IPR002067; Mitochondrial carrier protein::IPR011992; EF-hand domain pair::IPR018108; Mitochondrial substrate/solute carrier	calcium-binding mitochondrial carrier protein SCaMC-1-like; K14684 solute carrier family 25 (mitochondrial phosphate transporter), member 23/24/25/41 (A)	Calcium-binding mitochondrial carrier protein SCaMC-1 OS=Xenopus tropicalis GN=slc25a24 PE=2 SV=1
	Sa3F.554	Sa19F.116	GO:0003677; DNA binding; Molecular Function::GO:0003700; sequence-specific DNA binding transcription factor activity; Molecular Function::GO:0005634; nucleus; Cellular Component::GO:0006355; regulation of transcription, DNA-dependent; Biological Process::GO:0046983; protein dimerization activity; Molecular Function	IPR002100; Transcription factor, MADS-box::IPR002487; Transcription factor, K-box	MADS-box transcription factor 23; K09264 MADS-box transcription factor, plant (A)	Agamous-like MADS-box protein AGL21 OS=Arabidopsis thaliana GN=AGL21 PE=1 SV=1
	Sa3F.554	Sa22F.121	GO:0005507; copper ion binding; Molecular Function::GO:0005758; mitochondrial intermembrane space; Cellular Component::GO:0006825; copper ion transport; Biological Process::GO:0016531; copper chaperone activity; Molecular Function	IPR007745; Cytochrome c oxidase copper chaperone	hypothetical protein; K02260 cytochrome c oxidase assembly protein subunit 17 (A)	Cytochrome c oxidase copper chaperone 1 OS=Arabidopsis thaliana GN=COX17-1 PE=2 SV=1
	Sa3F.554	Sa23F.88	GO:0004857; enzyme inhibitor activity; Molecular Function::GO:0005618; cell wall; Cellular Component::GO:0030599; pectinesterase activity; Molecular Function::GO:0042545; cell wall modification; Biological Process	IPR000070; Pectinesterase, catalytic::IPR006501; Pectinesterase inhibitor domain	putative pectinesterase/pectinesterase inhibitor 24; K01051 pectinesterase [EC:3.1.1.11] (A)	Probable pectinesterase/pectinesterase inhibitor 46 OS=Arabidopsis thaliana GN=PME46 PE=2 SV=1
	Sa3F.554	Sa23F.88	GO:0004857; enzyme inhibitor activity; Molecular Function::GO:0005618; cell wall; Cellular Component::GO:0030599; pectinesterase activity; Molecular Function::GO:0042545; cell wall modification; Biological Process	IPR000070; Pectinesterase, catalytic::IPR006501; Pectinesterase inhibitor domain	putative pectinesterase/pectinesterase inhibitor 24; K01051 pectinesterase [EC:3.1.1.11] (A)	Probable pectinesterase/pectinesterase inhibitor 46 OS=Arabidopsis thaliana GN=PME46 PE=2 SV=1
	Sa3F.554	Sa38F.75	GO:0003677; DNA binding; Molecular Function::GO:0003700; sequence-specific DNA binding transcription factor activity; Molecular Function::GO:0005634; nucleus; Cellular Component::GO:0006355; regulation of transcription, DNA-dependent; Biological Process::GO:0046983; protein dimerization activity; Molecular Function	IPR002100; Transcription factor, MADS-box::IPR002487; Transcription factor, K-box	agamous-like MADS-box protein AGL1; K09264 MADS-box transcription factor, plant (A)	MADS-box protein SVP OS=Arabidopsis thaliana GN=SVP PE=1 SV=1
	Sa3F.554	Sa70F.89	GO:0003924; GTPase activity; Molecular Function::GO:0005525; GTP binding; Molecular Function::GO:0005622; intracellular; Cellular Component::GO:0006184; GTP catabolic process; Biological Process::GO:0006886; intracellular protein transport; Biological Process::GO:0006913; nucleocytoplasmic transport; Biological Process::GO:0007165; signal transduction; Biological Process::GO:0007264; small GTPase…	IPR001806; Small GTPase superfamily::IPR002041; Ran GTPase::IPR003578; Small GTPase superfamily, Rho type::IPR003579; Small GTPase superfamily, Rab type::IPR020849; Small GTPase superfamily, Ras type	ras-related protein RABA1f; K07904 Ras-related protein Rab-11A (A)	Ras-related protein RABA1f OS=Arabidopsis thaliana GN=RABA1F PE=2 SV=1
	Sa3F.554	Sa88F.80	GO:0015031; protein transport; Biological Process::GO:0016021; integral to membrane; Cellular Component	IPR007273; SCAMP	hypothetical protein; K19995 secretory carrier-associated membrane protein (A)	Secretory carrier-associated membrane protein 3 OS=Arabidopsis thaliana GN=SCAMP3 PE=1 SV=1
	Sa3F.554	Sa95F.52	GO:0005783; endoplasmic reticulum; Cellular Component::GO:0006886; intracellular protein transport; Biological Process::GO:0016021; integral to membrane; Cellular Component	IPR008417; B-cell receptor-associated 31-like	hypothetical protein; K14009 B-cell receptor-associated protein 31 (A)	B-cell receptor-associated protein 31 OS=Homo sapiens GN=BCAP31 PE=1 SV=3
	Sa3F.554	Sa98F.40	GO:0000166; nucleotide binding; Molecular Function::GO:0006812; cation transport; Biological Process::GO:0016021; integral to membrane; Cellular Component::GO:0019829; cation-transporting ATPase activity; Molecular Function::GO:0030001; metal ion transport; Biological Process::GO:0046872; metal ion binding; Molecular Function	IPR001757; Cation-transporting P-type ATPase::IPR006121; Heavy metal-associated domain, HMA::IPR008250; P-type ATPase, A domain::IPR023214; HAD-like domain::IPR027265; Divalent cation-transporting P-type ATPase	hypothetical protein; K01534 Cd2+/Zn2+-exporting ATPase [EC:3.6.3.3 3.6.3.5] (A)	Cadmium/zinc-transporting ATPase HMA2 OS=Arabidopsis thaliana GN=HMA2 PE=2 SV=1
	Sa3F.554	Sa148F.36	GO:0006812; cation transport; Biological Process::GO:0008324; cation transmembrane transporter activity; Molecular Function::GO:0016021; integral to membrane; Cellular Component::GO:0055085; transmembrane transport; Biological Process	IPR002524; Cation efflux protein	Metal tolerance protein B1, putative isoform 1; K14689 solute carrier family 30 (zinc transporter), member 2 (A)	Metal tolerance protein B OS=Arabidopsis thaliana GN=MTPB PE=2 SV=1
	Sa3F.554	Sa148F.6	GO:0008610; lipid biosynthetic process; Biological Process	IPR003333; Mycolic acid cyclopropane synthase	(S)-coclaurine N-methyltransferase; K13384 (S)-coclaurine N-methyltransferase [EC:2.1.1.140] (A)	(S)-coclaurine N-methyltransferase OS=Thalictrum flavum subsp. glaucum PE=1 SV=1
	Sa3F.554	Sa161F.43	GO:0005215; transporter activity; Molecular Function::GO:0006810; transport; Biological Process::GO:0016020; membrane; Cellular Component::GO:0055085; transmembrane transport; Biological Process	IPR006043; Xanthine/uracil/vitamin C permease	adenine/guanine permease AZG1-like; K06901 putative MFS transporter, AGZA family, xanthine/uracil permease (A)	Adenine/guanine permease AZG1 OS=Arabidopsis thaliana GN=AZG1 PE=2 SV=1
	Sa3F.554	Sa192F.42	GO:0004435; phosphatidylinositol phospholipase C activity; Molecular Function::GO:0005515; protein binding; Molecular Function::GO:0006629; lipid metabolic process; Biological Process::GO:0007165; signal transduction; Biological Process::GO:0035556; intracellular signal transduction; Biological Process	IPR000008; C2 calcium-dependent membrane targeting::IPR000909; Phospholipase C, phosphatidylinositol-specific , X domain::IPR001192; Phosphoinositide phospholipase C::IPR001711; Phospholipase C, phosphatidylinositol-specific, Y domain::IPR015359; Phospholipase C, phosphoinositol-specific, EF-hand-like::IPR018029; C2 membrane targeting protein	phosphoinositide phospholipase C 2-like; K05857 phosphatidylinositol phospholipase C, delta [EC:3.1.4.11] (A)	Phosphoinositide phospholipase C 2 OS=Arabidopsis thaliana GN=PLC2 PE=1 SV=1
	Sa3F.554	Sa262F.7	GO:0006071; glycerol metabolic process; Biological Process::GO:0008889; glycerophosphodiester phosphodiesterase activity; Molecular Function	IPR004129; Glycerophosphoryl diester phosphodiesterase	POPTRDRAFT_753230; glycerophosphoryl diester phosphodiesterase family protein; K01126 glycerophosphoryl diester phosphodiesterase [EC:3.1.4.46] (A)	Glycerophosphodiester phosphodiesterase GDPDL3 OS=Arabidopsis thaliana GN=GDPDL3 PE=1 SV=3
	Sa5F.25	Sa5F.278	GO:0006633; fatty acid biosynthetic process; Biological Process::GO:0008610; lipid biosynthetic process; Biological Process::GO:0016020; membrane; Cellular Component::GO:0016747; transferase activity, transferring acyl groups other than amino-acyl groups; Molecular Function	IPR013601; FAE1/Type III polyketide synthase-like protein::IPR013747; 3-Oxoacyl-[acyl-carrier-protein (ACP)] synthase III C-terminal	3-ketoacyl-CoA synthase 1; K15397 3-ketoacyl-CoA synthase [EC:2.3.1.199] (A)	3-ketoacyl-CoA synthase 1 OS=Arabidopsis thaliana GN=KCS1 PE=2 SV=1
	Sa5F.25	Sa6F.145	GO:0006812; cation transport; Biological Process::GO:0015299; solute:hydrogen antiporter activity; Molecular Function::GO:0016021; integral to membrane; Cellular Component::GO:0055085; transmembrane transport; Biological Process	IPR006153; Cation/H+ exchanger	NA	Cation/H(+) antiporter 20 OS=Arabidopsis thaliana GN=CHX20 PE=2 SV=1
	Sa5F.25	Sa7F.163	GO:0003700; sequence-specific DNA binding transcription factor activity; Molecular Function::GO:0006355; regulation of transcription, DNA-dependent; Biological Process::GO:0043565; sequence-specific DNA binding; Molecular Function	IPR004827; Basic-leucine zipper domain::IPR020983; Basic leucine-zipper, C-terminal	Os02g0128200; K09060 plant G-box-binding factor (A)	Light-inducible protein CPRF2 OS=Petroselinum crispum GN=CPRF2 PE=2 SV=2
	Sa5F.25	Sa7F.597	GO:0004190; aspartic-type endopeptidase activity; Molecular Function::GO:0006508; proteolysis; Biological Process::GO:0006629; lipid metabolic process; Biological Process	IPR001461; Peptidase A1::IPR007856; Saposin-like type B, 1::IPR008138; Saposin-like type B, 2::IPR008139; Saposin B	Aspartic proteinase precursor, putative (EC:3.4.23.40); K08245 phytepsin [EC:3.4.23.40] (A)	Aspartic proteinase A1 OS=Arabidopsis thaliana GN=APA1 PE=1 SV=1
	Sa5F.25	Sa8F.426	GO:0005525; GTP binding; Molecular Function::GO:0005622; intracellular; Cellular Component::GO:0007264; small GTPase mediated signal transduction; Biological Process::GO:0015031; protein transport; Biological Process	IPR001806; Small GTPase superfamily::IPR003578; Small GTPase superfamily, Rho type::IPR003579; Small GTPase superfamily, Rab type::IPR013684; Mitochondrial Rho-like	septum-promoting GTP-binding protein 1-like; K07976 Rab family, other (A)	Septum-promoting GTP-binding protein 1 OS=Schizosaccharomyces pombe (strain 972 / ATCC 24843) GN=spg1 PE=1 SV=1
	Sa5F.25	Sa8F.88	GO:0003700; sequence-specific DNA binding transcription factor activity; Molecular Function::GO:0006355; regulation of transcription, DNA-dependent; Biological Process::GO:0043565; sequence-specific DNA binding; Molecular Function	IPR003657; DNA-binding WRKY	WRKY22; WRKY transcription factor 22; K13425 WRKY transcription factor 22 (A)	WRKY transcription factor 22 OS=Arabidopsis thaliana GN=WRKY22 PE=2 SV=1
	Sa5F.25	Sa10F.172	GO:0055085; transmembrane transport; Biological Process	IPR002067; Mitochondrial carrier protein::IPR018108; Mitochondrial substrate/solute carrier	solute carrier family 25 member 44; K15121 solute carrier family 25, member 44 (A)	Solute carrier family 25 member 44 OS=Pongo abelii GN=SLC25A44 PE=2 SV=2
	Sa5F.25	Sa10F.349	GO:0005509; calcium ion binding; Molecular Function::GO:0055085; transmembrane transport; Biological Process	IPR002048; EF-hand domain::IPR002067; Mitochondrial carrier protein::IPR011992; EF-hand domain pair::IPR018108; Mitochondrial substrate/solute carrier	calcium-binding mitochondrial carrier protein SCaMC-1-like; K14684 solute carrier family 25 (mitochondrial phosphate transporter), member 23/24/25/41 (A)	Calcium-binding mitochondrial carrier protein SCaMC-1 OS=Xenopus tropicalis GN=slc25a24 PE=2 SV=1
	Sa5F.25	Sa18F.164	GO:0015078; hydrogen ion transmembrane transporter activity; Molecular Function::GO:0015991; ATP hydrolysis coupled proton transport; Biological Process::GO:0033180; proton-transporting V-type ATPase, V1 domain; Cellular Component	IPR004907; ATPase, V1 complex, subunit C	V-type proton ATPase subunit C; K02148 V-type H+-transporting ATPase subunit C (A)	V-type proton ATPase subunit C OS=Arabidopsis thaliana GN=VHA-C PE=1 SV=1
	Sa5F.25	Sa19F.116	GO:0003677; DNA binding; Molecular Function::GO:0003700; sequence-specific DNA binding transcription factor activity; Molecular Function::GO:0005634; nucleus; Cellular Component::GO:0006355; regulation of transcription, DNA-dependent; Biological Process::GO:0046983; protein dimerization activity; Molecular Function	IPR002100; Transcription factor, MADS-box::IPR002487; Transcription factor, K-box	MADS-box transcription factor 23; K09264 MADS-box transcription factor, plant (A)	Agamous-like MADS-box protein AGL21 OS=Arabidopsis thaliana GN=AGL21 PE=1 SV=1
	Sa5F.25	Sa20F.50	GO:0003677; DNA binding; Molecular Function::GO:0003700; sequence-specific DNA binding transcription factor activity; Molecular Function::GO:0006355; regulation of transcription, DNA-dependent; Biological Process	IPR001471; AP2/ERF domain::IPR003340; B3 DNA binding domain	AP2/ERF and B3 domain-containing transcription factor RAV1-like; K09287 RAV-like factor (A)	AP2/ERF and B3 domain-containing transcription repressor TEM1 OS=Arabidopsis thaliana GN=TEM1 PE=1 SV=1
	Sa5F.25	Sa22F.121	GO:0005507; copper ion binding; Molecular Function::GO:0005758; mitochondrial intermembrane space; Cellular Component::GO:0006825; copper ion transport; Biological Process::GO:0016531; copper chaperone activity; Molecular Function	IPR007745; Cytochrome c oxidase copper chaperone	hypothetical protein; K02260 cytochrome c oxidase assembly protein subunit 17 (A)	Cytochrome c oxidase copper chaperone 1 OS=Arabidopsis thaliana GN=COX17-1 PE=2 SV=1
	Sa5F.25	Sa23F.279	GO:0005525; GTP binding; Molecular Function::GO:0005622; intracellular; Cellular Component::GO:0006886; intracellular protein transport; Biological Process::GO:0007264; small GTPase mediated signal transduction; Biological Process::GO:0015031; protein transport; Biological Process	IPR003579; Small GTPase superfamily, Rab type::IPR006687; Small GTPase superfamily, SAR1-type::IPR006689; Small GTPase superfamily, ARF/SAR type::IPR024156; Small GTPase superfamily, ARF type	hypothetical protein; K07977 Arf/Sar family, other (A)	ADP-ribosylation factor OS=Dugesia japonica PE=2 SV=3
	Sa5F.25	Sa23F.88	GO:0004857; enzyme inhibitor activity; Molecular Function::GO:0005618; cell wall; Cellular Component::GO:0030599; pectinesterase activity; Molecular Function::GO:0042545; cell wall modification; Biological Process	IPR000070; Pectinesterase, catalytic::IPR006501; Pectinesterase inhibitor domain	putative pectinesterase/pectinesterase inhibitor 24; K01051 pectinesterase [EC:3.1.1.11] (A)	Probable pectinesterase/pectinesterase inhibitor 46 OS=Arabidopsis thaliana GN=PME46 PE=2 SV=1
	Sa5F.25	Sa23F.88	GO:0004857; enzyme inhibitor activity; Molecular Function::GO:0005618; cell wall; Cellular Component::GO:0030599; pectinesterase activity; Molecular Function::GO:0042545; cell wall modification; Biological Process	IPR000070; Pectinesterase, catalytic::IPR006501; Pectinesterase inhibitor domain	putative pectinesterase/pectinesterase inhibitor 24; K01051 pectinesterase [EC:3.1.1.11] (A)	Probable pectinesterase/pectinesterase inhibitor 46 OS=Arabidopsis thaliana GN=PME46 PE=2 SV=1
	Sa5F.25	Sa26F.180	GO:0015031; protein transport; Biological Process	IPR005024; Snf7	POPTRDRAFT_833929; SNF7 family protein; K12198 charged multivesicular body protein 5 (A)	Charged multivesicular body protein 5 OS=Rattus norvegicus GN=Chmp5 PE=2 SV=1
	Sa5F.25	Sa26F.280	GO:0005216; ion channel activity; Molecular Function::GO:0006811; ion transport; Biological Process::GO:0016020; membrane; Cellular Component::GO:0055085; transmembrane transport; Biological Process	IPR000595; Cyclic nucleotide-binding domain::IPR005821; Ion transport domain	cyclic nucleotide-gated ion channel 1-like; K05391 cyclic nucleotide gated channel, other eukaryote (A)	Cyclic nucleotide-gated ion channel 1 OS=Arabidopsis thaliana GN=CNGC1 PE=1 SV=1
	Sa5F.25	Sa33F.239	GO:0003677; DNA binding; Molecular Function::GO:0003700; sequence-specific DNA binding transcription factor activity; Molecular Function::GO:0005634; nucleus; Cellular Component::GO:0006355; regulation of transcription, DNA-dependent; Biological Process::GO:0046983; protein dimerization activity; Molecular Function	IPR002100; Transcription factor, MADS-box::IPR002487; Transcription factor, K-box::IPR020158; Protein of unknown function DUF2756	MADS-box transcription factor 23-like; K09264 MADS-box transcription factor, plant (A)	Agamous-like MADS-box protein AGL21 OS=Arabidopsis thaliana GN=AGL21 PE=1 SV=1
	Sa5F.25	Sa37F.129	GO:0005737; cytoplasm; Cellular Component::GO:0017089; glycolipid transporter activity; Molecular Function::GO:0046836; glycolipid transport; Biological Process::GO:0051861; glycolipid binding; Molecular Function	IPR014830; Glycolipid transfer protein domain	pleckstrin homology domain-containing family A member 8; K08051 pleckstrin homology domain containing, family A (phosphoinositide binding specific) member 8 (A)	Glycolipid transfer protein 2 OS=Arabidopsis thaliana GN=GLTP2 PE=2 SV=1
	Sa5F.25	Sa37F.129	GO:0005737; cytoplasm; Cellular Component::GO:0017089; glycolipid transporter activity; Molecular Function::GO:0046836; glycolipid transport; Biological Process::GO:0051861; glycolipid binding; Molecular Function	IPR014830; Glycolipid transfer protein domain	pleckstrin homology domain-containing family A member 8; K08051 pleckstrin homology domain containing, family A (phosphoinositide binding specific) member 8 (A)	Glycolipid transfer protein 2 OS=Arabidopsis thaliana GN=GLTP2 PE=2 SV=1
	Sa5F.25	Sa37F.254	GO:0003700; sequence-specific DNA binding transcription factor activity; Molecular Function::GO:0006355; regulation of transcription, DNA-dependent; Biological Process::GO:0043565; sequence-specific DNA binding; Molecular Function	IPR003657; DNA-binding WRKY	cyclin-dependent kinase 12; K08819 cyclin-dependent kinase 12/13 [EC:2.7.11.22 2.7.11.23] (A)	Probable WRKY transcription factor 4 OS=Arabidopsis thaliana GN=WRKY4 PE=1 SV=2
	Sa5F.25	Sa44F.212	GO:0003700; sequence-specific DNA binding transcription factor activity; Molecular Function::GO:0006355; regulation of transcription, DNA-dependent; Biological Process::GO:0043565; sequence-specific DNA binding; Molecular Function	IPR001356; Homeobox domain::IPR002913; START domain	homeobox-leucine zipper protein GLABRA 2-like; K09338 homeobox-leucine zipper protein (A)	Homeobox-leucine zipper protein GLABRA 2 OS=Arabidopsis thaliana GN=GL2 PE=2 SV=3
	Sa5F.25	Sa49F.106	GO:0016301; kinase activity; Molecular Function::GO:0046474; glycerophospholipid biosynthetic process; Biological Process	IPR026712; Choline/Ethanolamine kinase	probable choline kinase 1; K14156 choline/ethanolamine kinase [EC:2.7.1.32 2.7.1.82] (A)	Probable choline kinase 2 OS=Arabidopsis thaliana GN=At1g74320 PE=2 SV=1
	Sa5F.25	Sa49F.56	GO:0003700; sequence-specific DNA binding transcription factor activity; Molecular Function::GO:0006355; regulation of transcription, DNA-dependent; Biological Process	IPR001471; AP2/ERF domain	ethylene-responsive transcription factor RAP2-4; K09286 EREBP-like factor (A)	Ethylene-responsive transcription factor RAP2-4 OS=Arabidopsis thaliana GN=RAP2-4 PE=1 SV=1
	Sa5F.25	Sa52F.65	GO:0003700; sequence-specific DNA binding transcription factor activity; Molecular Function::GO:0006355; regulation of transcription, DNA-dependent; Biological Process	IPR001471; AP2/ERF domain	ethylene-responsive transcription factor RAP2-7-like; K09284 AP2-like factor, euAP2 lineage (A)	Floral homeotic protein APETALA 2 OS=Arabidopsis thaliana GN=AP2 PE=1 SV=1
	Sa5F.25	Sa53F.153	GO:0005622; intracellular; Cellular Component::GO:0006886; intracellular protein transport; Biological Process	IPR004152; GAT	NA	TOM1-like protein 2 OS=Xenopus laevis GN=tom1l2 PE=2 SV=1
	Sa5F.25	Sa56F.37	GO:0016020; membrane; Cellular Component::GO:0048193; Golgi vesicle transport; Biological Process	IPR015260; Syntaxin 6, N-terminal	syntaxin-61; K08498 syntaxin 6 (A)	NA
	Sa5F.25	Sa70F.89	GO:0003924; GTPase activity; Molecular Function::GO:0005525; GTP binding; Molecular Function::GO:0005622; intracellular; Cellular Component::GO:0006184; GTP catabolic process; Biological Process::GO:0006886; intracellular protein transport; Biological Process::GO:0006913; nucleocytoplasmic transport; Biological Process::GO:0007165; signal transduction; Biological Process::GO:0007264; small GTPase…	IPR001806; Small GTPase superfamily::IPR002041; Ran GTPase::IPR003578; Small GTPase superfamily, Rho type::IPR003579; Small GTPase superfamily, Rab type::IPR020849; Small GTPase superfamily, Ras type	ras-related protein RABA1f; K07904 Ras-related protein Rab-11A (A)	Ras-related protein RABA1f OS=Arabidopsis thaliana GN=RABA1F PE=2 SV=1
	Sa5F.25	Sa76F.29	GO:0006855; drug transmembrane transport; Biological Process::GO:0015238; drug transmembrane transporter activity; Molecular Function::GO:0015297; antiporter activity; Molecular Function::GO:0016020; membrane; Cellular Component::GO:0055085; transmembrane transport; Biological Process	IPR002528; Multi antimicrobial extrusion protein	MATE efflux family protein 8-like; K03327 multidrug resistance protein, MATE family (A)	MATE efflux family protein 9 OS=Arabidopsis thaliana GN=DTXL5 PE=2 SV=1
	Sa5F.25	Sa79F.158	GO:0003677; DNA binding; Molecular Function::GO:0003700; sequence-specific DNA binding transcription factor activity; Molecular Function::GO:0006355; regulation of transcription, DNA-dependent; Biological Process::GO:0043565; sequence-specific DNA binding; Molecular Function	IPR001356; Homeobox domain::IPR006563; POX domain::IPR008422; Homeobox KN domain	homeobox protein BEL1 homolog; K16670 homeobox protein Meis2 (A)	BEL1-like homeodomain protein 7 OS=Arabidopsis thaliana GN=BLH7 PE=2 SV=1
	Sa5F.25	Sa79F.71	GO:0006855; drug transmembrane transport; Biological Process::GO:0015238; drug transmembrane transporter activity; Molecular Function::GO:0015297; antiporter activity; Molecular Function::GO:0016020; membrane; Cellular Component::GO:0055085; transmembrane transport; Biological Process	IPR002528; Multi antimicrobial extrusion protein	protein TRANSPARENT TESTA 12-like; K03327 multidrug resistance protein, MATE family (A)	Protein TRANSPARENT TESTA 12 OS=Arabidopsis thaliana GN=TT12 PE=2 SV=1
	Sa5F.25	Sa83F.84	GO:0016021; integral to membrane; Cellular Component::GO:0022857; transmembrane transporter activity; Molecular Function::GO:0055085; transmembrane transport; Biological Process	IPR005828; General substrate transporter::IPR020846; Major facilitator superfamily domain	probable inositol transporter 2; K08150 MFS transporter, SP family, solute carrier family 2 (myo-inositol transporter), member 13 (A)	Monosaccharide-sensing protein 2 OS=Arabidopsis thaliana GN=MSSP2 PE=1 SV=2
	Sa5F.25	Sa83F.85	GO:0016020; membrane; Cellular Component::GO:0016021; integral to membrane; Cellular Component::GO:0022857; transmembrane transporter activity; Molecular Function::GO:0022891; substrate-specific transmembrane transporter activity; Molecular Function::GO:0055085; transmembrane transport; Biological Process	IPR003663; Sugar/inositol transporter::IPR005828; General substrate transporter	sugar porter (SP) family MFS transporter; K08150 MFS transporter, SP family, solute carrier family 2 (myo-inositol transporter), member 13 (A)	Monosaccharide-sensing protein 2 OS=Arabidopsis thaliana GN=MSSP2 PE=1 SV=2
	Sa5F.25	Sa88F.80	GO:0015031; protein transport; Biological Process::GO:0016021; integral to membrane; Cellular Component	IPR007273; SCAMP	hypothetical protein; K19995 secretory carrier-associated membrane protein (A)	Secretory carrier-associated membrane protein 3 OS=Arabidopsis thaliana GN=SCAMP3 PE=1 SV=1
	Sa5F.25	Sa92F.66	GO:0003700; sequence-specific DNA binding transcription factor activity; Molecular Function::GO:0006355; regulation of transcription, DNA-dependent; Biological Process::GO:0043565; sequence-specific DNA binding; Molecular Function	IPR003657; DNA-binding WRKY	probable WRKY transcription factor 26; K13424 WRKY transcription factor 33 (A)	Probable WRKY transcription factor 61 OS=Arabidopsis thaliana GN=WRKY61 PE=2 SV=1
	Sa5F.25	Sa95F.52	GO:0005783; endoplasmic reticulum; Cellular Component::GO:0006886; intracellular protein transport; Biological Process::GO:0016021; integral to membrane; Cellular Component	IPR008417; B-cell receptor-associated 31-like	hypothetical protein; K14009 B-cell receptor-associated protein 31 (A)	B-cell receptor-associated protein 31 OS=Homo sapiens GN=BCAP31 PE=1 SV=3
	Sa5F.25	Sa98F.40	GO:0000166; nucleotide binding; Molecular Function::GO:0006812; cation transport; Biological Process::GO:0016021; integral to membrane; Cellular Component::GO:0019829; cation-transporting ATPase activity; Molecular Function::GO:0030001; metal ion transport; Biological Process::GO:0046872; metal ion binding; Molecular Function	IPR001757; Cation-transporting P-type ATPase::IPR006121; Heavy metal-associated domain, HMA::IPR008250; P-type ATPase, A domain::IPR023214; HAD-like domain::IPR027265; Divalent cation-transporting P-type ATPase	hypothetical protein; K01534 Cd2+/Zn2+-exporting ATPase [EC:3.6.3.3 3.6.3.5] (A)	Cadmium/zinc-transporting ATPase HMA2 OS=Arabidopsis thaliana GN=HMA2 PE=2 SV=1
	Sa5F.25	Sa99F.123	GO:0003700; sequence-specific DNA binding transcription factor activity; Molecular Function::GO:0006355; regulation of transcription, DNA-dependent; Biological Process::GO:0043565; sequence-specific DNA binding; Molecular Function	IPR003657; DNA-binding WRKY	WRKY transcription factor 22; K13425 WRKY transcription factor 22 (A)	WRKY transcription factor 22 OS=Arabidopsis thaliana GN=WRKY22 PE=2 SV=1
	Sa5F.25	Sa99F.163	GO:0006952; defense response; Biological Process::GO:0016021; integral to membrane; Cellular Component	IPR004326; Mlo-related protein	MLO-like protein 6; K08472 mlo protein (A)	MLO-like protein 6 OS=Arabidopsis thaliana GN=MLO6 PE=2 SV=2
	Sa5F.25	Sa102F.24	GO:0006629; lipid metabolic process; Biological Process	IPR002641; Patatin/Phospholipase A2-related	patatin-like phospholipase domain-containing protein 2; K16816 patatin-like phospholipase domain-containing protein 2 [EC:3.1.1.3] (A)	Patatin-like phospholipase domain-containing protein 4 OS=Homo sapiens GN=PNPLA4 PE=2 SV=3
	Sa5F.25	Sa110F.59	GO:0016020; membrane; Cellular Component::GO:0016021; integral to membrane; Cellular Component::GO:0022857; transmembrane transporter activity; Molecular Function::GO:0022891; substrate-specific transmembrane transporter activity; Molecular Function::GO:0055085; transmembrane transport; Biological Process	IPR003663; Sugar/inositol transporter::IPR005828; General substrate transporter::IPR020846; Major facilitator superfamily domain	inositol transporter 1; K08150 MFS transporter, SP family, solute carrier family 2 (myo-inositol transporter), member 13 (A)	D-xylose-proton symporter-like 2 OS=Arabidopsis thaliana GN=At5g17010 PE=1 SV=1
	Sa5F.25	Sa148F.36	GO:0006812; cation transport; Biological Process::GO:0008324; cation transmembrane transporter activity; Molecular Function::GO:0016021; integral to membrane; Cellular Component::GO:0055085; transmembrane transport; Biological Process	IPR002524; Cation efflux protein	Metal tolerance protein B1, putative isoform 1; K14689 solute carrier family 30 (zinc transporter), member 2 (A)	Metal tolerance protein B OS=Arabidopsis thaliana GN=MTPB PE=2 SV=1
	Sa5F.25	Sa148F.6	GO:0008610; lipid biosynthetic process; Biological Process	IPR003333; Mycolic acid cyclopropane synthase	(S)-coclaurine N-methyltransferase; K13384 (S)-coclaurine N-methyltransferase [EC:2.1.1.140] (A)	(S)-coclaurine N-methyltransferase OS=Thalictrum flavum subsp. glaucum PE=1 SV=1
	Sa5F.25	Sa161F.43	GO:0005215; transporter activity; Molecular Function::GO:0006810; transport; Biological Process::GO:0016020; membrane; Cellular Component::GO:0055085; transmembrane transport; Biological Process	IPR006043; Xanthine/uracil/vitamin C permease	adenine/guanine permease AZG1-like; K06901 putative MFS transporter, AGZA family, xanthine/uracil permease (A)	Adenine/guanine permease AZG1 OS=Arabidopsis thaliana GN=AZG1 PE=2 SV=1
	Sa6F.233	Sa7F.163	GO:0003700; sequence-specific DNA binding transcription factor activity; Molecular Function::GO:0006355; regulation of transcription, DNA-dependent; Biological Process::GO:0043565; sequence-specific DNA binding; Molecular Function	IPR004827; Basic-leucine zipper domain::IPR020983; Basic leucine-zipper, C-terminal	Os02g0128200; K09060 plant G-box-binding factor (A)	Light-inducible protein CPRF2 OS=Petroselinum crispum GN=CPRF2 PE=2 SV=2
	Sa6F.233	Sa8F.426	GO:0005525; GTP binding; Molecular Function::GO:0005622; intracellular; Cellular Component::GO:0007264; small GTPase mediated signal transduction; Biological Process::GO:0015031; protein transport; Biological Process	IPR001806; Small GTPase superfamily::IPR003578; Small GTPase superfamily, Rho type::IPR003579; Small GTPase superfamily, Rab type::IPR013684; Mitochondrial Rho-like	septum-promoting GTP-binding protein 1-like; K07976 Rab family, other (A)	Septum-promoting GTP-binding protein 1 OS=Schizosaccharomyces pombe (strain 972 / ATCC 24843) GN=spg1 PE=1 SV=1
	Sa6F.233	Sa8F.88	GO:0003700; sequence-specific DNA binding transcription factor activity; Molecular Function::GO:0006355; regulation of transcription, DNA-dependent; Biological Process::GO:0043565; sequence-specific DNA binding; Molecular Function	IPR003657; DNA-binding WRKY	WRKY22; WRKY transcription factor 22; K13425 WRKY transcription factor 22 (A)	WRKY transcription factor 22 OS=Arabidopsis thaliana GN=WRKY22 PE=2 SV=1
	Sa6F.233	Sa9F.367	GO:0003700; sequence-specific DNA binding transcription factor activity; Molecular Function::GO:0006355; regulation of transcription, DNA-dependent; Biological Process	IPR001471; AP2/ERF domain	ethylene-responsive transcription factor 1B-like; K14516 ethylene-responsive transcription factor 1 (A)	Ethylene-responsive transcription factor 1B OS=Arabidopsis thaliana GN=ERF1B PE=1 SV=2
	Sa6F.233	Sa10F.172	GO:0055085; transmembrane transport; Biological Process	IPR002067; Mitochondrial carrier protein::IPR018108; Mitochondrial substrate/solute carrier	solute carrier family 25 member 44; K15121 solute carrier family 25, member 44 (A)	Solute carrier family 25 member 44 OS=Pongo abelii GN=SLC25A44 PE=2 SV=2
	Sa6F.233	Sa10F.18	GO:0003700; sequence-specific DNA binding transcription factor activity; Molecular Function::GO:0006355; regulation of transcription, DNA-dependent; Biological Process::GO:0043565; sequence-specific DNA binding; Molecular Function	IPR003657; DNA-binding WRKY	WRKY family transcription factor; K01892 histidyl-tRNA synthetase [EC:6.1.1.21] (A)	WRKY transcription factor 6 OS=Arabidopsis thaliana GN=WRKY6 PE=1 SV=1
	Sa6F.233	Sa10F.450.1	GO:0005669; transcription factor TFIID complex; Cellular Component::GO:0006352; DNA-dependent transcription, initiation; Biological Process	IPR007900; Transcription initiation factor TFIID component TAF4	transcription initiation factor TFIID subunit 4b-like; K03129 transcription initiation factor TFIID subunit 4 (A)	Transcription initiation factor TFIID subunit 4b OS=Arabidopsis thaliana GN=TAF4B PE=1 SV=1
	Sa6F.233	Sa13F.105	GO:0005215; transporter activity; Molecular Function::GO:0006810; transport; Biological Process::GO:0016020; membrane; Cellular Component	IPR000425; Major intrinsic protein	aquaporin NIP1-1-like; K09874 aquaporin NIP (A)	Aquaporin NIP1-2 OS=Arabidopsis thaliana GN=NIP1-2 PE=2 SV=2
	Sa6F.233	Sa13F.108	GO:0003924; GTPase activity; Molecular Function::GO:0005525; GTP binding; Molecular Function::GO:0005622; intracellular; Cellular Component::GO:0006184; GTP catabolic process; Biological Process::GO:0006886; intracellular protein transport; Biological Process::GO:0006913; nucleocytoplasmic transport; Biological Process::GO:0007165; signal transduction; Biological Process::GO:0007264; small GTPase…	IPR001806; Small GTPase superfamily::IPR002041; Ran GTPase::IPR003578; Small GTPase superfamily, Rho type::IPR003579; Small GTPase superfamily, Rab type::IPR020849; Small GTPase superfamily, Ras type	RAB GTPase A1C; K07904 Ras-related protein Rab-11A (A)	Ras-related protein RABA1c OS=Arabidopsis thaliana GN=RABA1C PE=2 SV=1
	Sa6F.233	Sa15F.4	GO:0003700; sequence-specific DNA binding transcription factor activity; Molecular Function::GO:0006355; regulation of transcription, DNA-dependent; Biological Process	IPR001471; AP2/ERF domain	ethylene response factor; K09286 EREBP-like factor (A)	Ethylene-responsive transcription factor 7 OS=Arabidopsis thaliana GN=ERF7 PE=1 SV=1
	Sa6F.233	Sa23F.279	GO:0005525; GTP binding; Molecular Function::GO:0005622; intracellular; Cellular Component::GO:0006886; intracellular protein transport; Biological Process::GO:0007264; small GTPase mediated signal transduction; Biological Process::GO:0015031; protein transport; Biological Process	IPR003579; Small GTPase superfamily, Rab type::IPR006687; Small GTPase superfamily, SAR1-type::IPR006689; Small GTPase superfamily, ARF/SAR type::IPR024156; Small GTPase superfamily, ARF type	hypothetical protein; K07977 Arf/Sar family, other (A)	ADP-ribosylation factor OS=Dugesia japonica PE=2 SV=3
	Sa6F.233	Sa23F.88	GO:0004857; enzyme inhibitor activity; Molecular Function::GO:0005618; cell wall; Cellular Component::GO:0030599; pectinesterase activity; Molecular Function::GO:0042545; cell wall modification; Biological Process	IPR000070; Pectinesterase, catalytic::IPR006501; Pectinesterase inhibitor domain	putative pectinesterase/pectinesterase inhibitor 24; K01051 pectinesterase [EC:3.1.1.11] (A)	Probable pectinesterase/pectinesterase inhibitor 46 OS=Arabidopsis thaliana GN=PME46 PE=2 SV=1
	Sa6F.233	Sa23F.88	GO:0004857; enzyme inhibitor activity; Molecular Function::GO:0005618; cell wall; Cellular Component::GO:0030599; pectinesterase activity; Molecular Function::GO:0042545; cell wall modification; Biological Process	IPR000070; Pectinesterase, catalytic::IPR006501; Pectinesterase inhibitor domain	putative pectinesterase/pectinesterase inhibitor 24; K01051 pectinesterase [EC:3.1.1.11] (A)	Probable pectinesterase/pectinesterase inhibitor 46 OS=Arabidopsis thaliana GN=PME46 PE=2 SV=1
	Sa6F.233	Sa24F.238	GO:0005515; protein binding; Molecular Function::GO:0016021; integral to membrane; Cellular Component::GO:0016192; vesicle-mediated transport; Biological Process	IPR001388; Synaptobrevin::IPR001680; WD40 repeat	lethal(2) giant larvae protein homolog SRO77-like; K08518 syntaxin-binding protein 5 (A)	Syntaxin-binding protein 5 OS=Mus musculus GN=Stxbp5 PE=1 SV=3
	Sa6F.233	Sa26F.180	GO:0015031; protein transport; Biological Process	IPR005024; Snf7	POPTRDRAFT_833929; SNF7 family protein; K12198 charged multivesicular body protein 5 (A)	Charged multivesicular body protein 5 OS=Rattus norvegicus GN=Chmp5 PE=2 SV=1
	Sa6F.233	Sa26F.280	GO:0005216; ion channel activity; Molecular Function::GO:0006811; ion transport; Biological Process::GO:0016020; membrane; Cellular Component::GO:0055085; transmembrane transport; Biological Process	IPR000595; Cyclic nucleotide-binding domain::IPR005821; Ion transport domain	cyclic nucleotide-gated ion channel 1-like; K05391 cyclic nucleotide gated channel, other eukaryote (A)	Cyclic nucleotide-gated ion channel 1 OS=Arabidopsis thaliana GN=CNGC1 PE=1 SV=1
	Sa6F.233	Sa33F.239	GO:0003677; DNA binding; Molecular Function::GO:0003700; sequence-specific DNA binding transcription factor activity; Molecular Function::GO:0005634; nucleus; Cellular Component::GO:0006355; regulation of transcription, DNA-dependent; Biological Process::GO:0046983; protein dimerization activity; Molecular Function	IPR002100; Transcription factor, MADS-box::IPR002487; Transcription factor, K-box::IPR020158; Protein of unknown function DUF2756	MADS-box transcription factor 23-like; K09264 MADS-box transcription factor, plant (A)	Agamous-like MADS-box protein AGL21 OS=Arabidopsis thaliana GN=AGL21 PE=1 SV=1
	Sa6F.233	Sa40F.30	GO:0005750; mitochondrial respiratory chain complex III; Cellular Component::GO:0006122; mitochondrial electron transport, ubiquinol to cytochrome c; Biological Process	IPR003197; Cytochrome b-c1 complex subunit 7	cytochrome b-c1 complex subunit 7-2; K00417 ubiquinol-cytochrome c reductase subunit 7 (A)	Cytochrome b-c1 complex subunit 7-2 OS=Arabidopsis thaliana GN=QCR7-2 PE=1 SV=1
	Sa6F.233	Sa44F.108	GO:0005525; GTP binding; Molecular Function::GO:0005622; intracellular; Cellular Component::GO:0007264; small GTPase mediated signal transduction; Biological Process::GO:0015031; protein transport; Biological Process	IPR001806; Small GTPase superfamily::IPR003579; Small GTPase superfamily, Rab type::IPR013684; Mitochondrial Rho-like	septum-promoting GTP-binding protein 1-like; K07976 Rab family, other (A)	Septum-promoting GTP-binding protein 1 OS=Schizosaccharomyces pombe (strain 972 / ATCC 24843) GN=spg1 PE=1 SV=1
	Sa6F.233	Sa44F.163	GO:0003700; sequence-specific DNA binding transcription factor activity; Molecular Function::GO:0006351; transcription, DNA-dependent; Biological Process::GO:0006355; regulation of transcription, DNA-dependent; Biological Process::GO:0043565; sequence-specific DNA binding; Molecular Function	IPR004827; Basic-leucine zipper domain::IPR025422; Transcription factor TGA like domain	transcription factor HBP-1b(c38)-like; K14431 transcription factor TGA (A)	TGACG-sequence-specific DNA-binding protein TGA-2.1 OS=Nicotiana tabacum GN=TGA21 PE=1 SV=1
	Sa6F.233	Sa45F.71.2	GO:0015031; protein transport; Biological Process::GO:0016021; integral to membrane; Cellular Component	IPR007273; SCAMP	secretory carrier-associated membrane protein 3-like; K19995 secretory carrier-associated membrane protein (A)	Secretory carrier-associated membrane protein 3 OS=Arabidopsis thaliana GN=SCAMP3 PE=1 SV=1
	Sa6F.233	Sa46F.175	GO:0003924; GTPase activity; Molecular Function::GO:0005525; GTP binding; Molecular Function::GO:0005622; intracellular; Cellular Component::GO:0006184; GTP catabolic process; Biological Process::GO:0006886; intracellular protein transport; Biological Process::GO:0006913; nucleocytoplasmic transport; Biological Process::GO:0007165; signal transduction; Biological Process::GO:0007264; small GTPase…	IPR001806; Small GTPase superfamily::IPR002041; Ran GTPase::IPR003578; Small GTPase superfamily, Rho type::IPR003579; Small GTPase superfamily, Rab type::IPR020849; Small GTPase superfamily, Ras type::IPR024156; Small GTPase superfamily, ARF type	GTP-binding protein YPTM2-like; K07874 Ras-related protein Rab-1A (A)	Ras-related protein RABD2a OS=Arabidopsis thaliana GN=RABD2A PE=1 SV=3
	Sa6F.233	Sa49F.106	GO:0016301; kinase activity; Molecular Function::GO:0046474; glycerophospholipid biosynthetic process; Biological Process	IPR026712; Choline/Ethanolamine kinase	probable choline kinase 1; K14156 choline/ethanolamine kinase [EC:2.7.1.32 2.7.1.82] (A)	Probable choline kinase 2 OS=Arabidopsis thaliana GN=At1g74320 PE=2 SV=1
	Sa6F.233	Sa52F.65	GO:0003700; sequence-specific DNA binding transcription factor activity; Molecular Function::GO:0006355; regulation of transcription, DNA-dependent; Biological Process	IPR001471; AP2/ERF domain	ethylene-responsive transcription factor RAP2-7-like; K09284 AP2-like factor, euAP2 lineage (A)	Floral homeotic protein APETALA 2 OS=Arabidopsis thaliana GN=AP2 PE=1 SV=1
	Sa6F.233	Sa55F.243	GO:0016021; integral to membrane; Cellular Component::GO:0055085; transmembrane transport; Biological Process	IPR004776; Auxin efflux carrier	probable auxin efflux carrier component 1b; K13947 auxin efflux carrier family (A)	Probable auxin efflux carrier component 1c OS=Oryza sativa subsp. japonica GN=PIN1C PE=2 SV=1
	Sa6F.233	Sa55F.63	GO:0030001; metal ion transport; Biological Process::GO:0046872; metal ion binding; Molecular Function	IPR006121; Heavy metal-associated domain, HMA	copper transport protein CCH-like; K07213 copper chaperone (A)	Heavy metal-associated isoprenylated plant protein 26 OS=Arabidopsis thaliana GN=HIPP26 PE=1 SV=1
	Sa6F.233	Sa56F.37	GO:0016020; membrane; Cellular Component::GO:0048193; Golgi vesicle transport; Biological Process	IPR015260; Syntaxin 6, N-terminal	syntaxin-61; K08498 syntaxin 6 (A)	NA
	Sa6F.233	Sa58F.119	GO:0004601; peroxidase activity; Molecular Function::GO:0006979; response to oxidative stress; Biological Process::GO:0020037; heme binding; Molecular Function::GO:0055114; oxidation-reduction process; Biological Process	IPR000823; Plant peroxidase::IPR002016; Haem peroxidase, plant/fungal/bacterial	cationic peroxidase 1-like; K00430 peroxidase [EC:1.11.1.7] (A)	Cationic peroxidase 1 OS=Arachis hypogaea GN=PNC1 PE=1 SV=2
	Sa6F.233	Sa59F.78	GO:0004601; peroxidase activity; Molecular Function::GO:0006979; response to oxidative stress; Biological Process::GO:0020037; heme binding; Molecular Function::GO:0055114; oxidation-reduction process; Biological Process	IPR000823; Plant peroxidase::IPR002016; Haem peroxidase, plant/fungal/bacterial	peroxidase 4-like; K00430 peroxidase [EC:1.11.1.7] (A)	Peroxidase 52 OS=Arabidopsis thaliana GN=PER52 PE=2 SV=1
	Sa6F.233	Sa60F.42	GO:0006914; autophagy; Biological Process::GO:0015031; protein transport; Biological Process::GO:0032258; CVT pathway; Biological Process	IPR004241; Autophagy-related protein Atg8 family::IPR027732; Autophagy-related protein 8, Streptophyta	autophagy-related protein 8f; K08341 GABA(A) receptor-associated protein (A)	Autophagy-related protein 8e OS=Arabidopsis thaliana GN=ATG8E PE=2 SV=2
	Sa6F.233	Sa67F.151	GO:0000976; transcription regulatory region sequence-specific DNA binding; Molecular Function::GO:0003700; sequence-specific DNA binding transcription factor activity; Molecular Function::GO:0006355; regulation of transcription, DNA-dependent; Biological Process::GO:0043565; sequence-specific DNA binding; Molecular Function	IPR000047; Helix-turn-helix motif::IPR001356; Homeobox domain	homeobox-leucine zipper protein ATHB-40; K09338 homeobox-leucine zipper protein (A)	Homeobox-leucine zipper protein ATHB-40 OS=Arabidopsis thaliana GN=ATHB-40 PE=2 SV=3
	Sa6F.233	Sa76F.29	GO:0006855; drug transmembrane transport; Biological Process::GO:0015238; drug transmembrane transporter activity; Molecular Function::GO:0015297; antiporter activity; Molecular Function::GO:0016020; membrane; Cellular Component::GO:0055085; transmembrane transport; Biological Process	IPR002528; Multi antimicrobial extrusion protein	MATE efflux family protein 8-like; K03327 multidrug resistance protein, MATE family (A)	MATE efflux family protein 9 OS=Arabidopsis thaliana GN=DTXL5 PE=2 SV=1
	Sa6F.233	Sa78F.170	GO:0006839; mitochondrial transport; Biological Process::GO:0031966; mitochondrial membrane; Cellular Component	IPR002030; Mitochondrial brown fat uncoupling protein::IPR018108; Mitochondrial substrate/solute carrier	mitochondrial uncoupling protein 1-like; K15103 solute carrier family 25 (mitochondrial uncoupling protein), member 8/9 (A)	Mitochondrial uncoupling protein 1 OS=Arabidopsis thaliana GN=PUMP1 PE=1 SV=1
	Sa6F.233	Sa79F.138	GO:0004553; hydrolase activity, hydrolyzing O-glycosyl compounds; Molecular Function::GO:0005618; cell wall; Cellular Component::GO:0005975; carbohydrate metabolic process; Biological Process::GO:0006073; cellular glucan metabolic process; Biological Process::GO:0016762; xyloglucan:xyloglucosyl transferase activity; Molecular Function::GO:0048046; apoplast; Cellular Component	IPR000757; Glycoside hydrolase, family 16::IPR010713; Xyloglucan endo-transglycosylase, C-terminal	probable xyloglucan endotransglucosylase/hydrolase protein 23; K08235 xyloglucan:xyloglucosyl transferase [EC:2.4.1.207] (A)	Xyloglucan endotransglucosylase/hydrolase protein 22 OS=Arabidopsis thaliana GN=XTH22 PE=1 SV=1
	Sa6F.233	Sa79F.158	GO:0003677; DNA binding; Molecular Function::GO:0003700; sequence-specific DNA binding transcription factor activity; Molecular Function::GO:0006355; regulation of transcription, DNA-dependent; Biological Process::GO:0043565; sequence-specific DNA binding; Molecular Function	IPR001356; Homeobox domain::IPR006563; POX domain::IPR008422; Homeobox KN domain	homeobox protein BEL1 homolog; K16670 homeobox protein Meis2 (A)	BEL1-like homeodomain protein 7 OS=Arabidopsis thaliana GN=BLH7 PE=2 SV=1
	Sa6F.233	Sa83F.84	GO:0016021; integral to membrane; Cellular Component::GO:0022857; transmembrane transporter activity; Molecular Function::GO:0055085; transmembrane transport; Biological Process	IPR005828; General substrate transporter::IPR020846; Major facilitator superfamily domain	probable inositol transporter 2; K08150 MFS transporter, SP family, solute carrier family 2 (myo-inositol transporter), member 13 (A)	Monosaccharide-sensing protein 2 OS=Arabidopsis thaliana GN=MSSP2 PE=1 SV=2
	Sa6F.233	Sa83F.85	GO:0016020; membrane; Cellular Component::GO:0016021; integral to membrane; Cellular Component::GO:0022857; transmembrane transporter activity; Molecular Function::GO:0022891; substrate-specific transmembrane transporter activity; Molecular Function::GO:0055085; transmembrane transport; Biological Process	IPR003663; Sugar/inositol transporter::IPR005828; General substrate transporter	sugar porter (SP) family MFS transporter; K08150 MFS transporter, SP family, solute carrier family 2 (myo-inositol transporter), member 13 (A)	Monosaccharide-sensing protein 2 OS=Arabidopsis thaliana GN=MSSP2 PE=1 SV=2
	Sa6F.233	Sa85F.63	GO:0003700; sequence-specific DNA binding transcription factor activity; Molecular Function::GO:0006355; regulation of transcription, DNA-dependent; Biological Process::GO:0043565; sequence-specific DNA binding; Molecular Function	IPR004827; Basic-leucine zipper domain	transcription factor HBP-1a; K09060 plant G-box-binding factor (A)	Ocs element-binding factor 1 OS=Zea mays GN=OBF1 PE=2 SV=2
	Sa6F.233	Sa92F.66	GO:0003700; sequence-specific DNA binding transcription factor activity; Molecular Function::GO:0006355; regulation of transcription, DNA-dependent; Biological Process::GO:0043565; sequence-specific DNA binding; Molecular Function	IPR003657; DNA-binding WRKY	probable WRKY transcription factor 26; K13424 WRKY transcription factor 33 (A)	Probable WRKY transcription factor 61 OS=Arabidopsis thaliana GN=WRKY61 PE=2 SV=1
	Sa6F.233	Sa99F.123	GO:0003700; sequence-specific DNA binding transcription factor activity; Molecular Function::GO:0006355; regulation of transcription, DNA-dependent; Biological Process::GO:0043565; sequence-specific DNA binding; Molecular Function	IPR003657; DNA-binding WRKY	WRKY transcription factor 22; K13425 WRKY transcription factor 22 (A)	WRKY transcription factor 22 OS=Arabidopsis thaliana GN=WRKY22 PE=2 SV=1
	Sa6F.233	Sa99F.163	GO:0006952; defense response; Biological Process::GO:0016021; integral to membrane; Cellular Component	IPR004326; Mlo-related protein	MLO-like protein 6; K08472 mlo protein (A)	MLO-like protein 6 OS=Arabidopsis thaliana GN=MLO6 PE=2 SV=2
	Sa6F.233	Sa102F.24	GO:0006629; lipid metabolic process; Biological Process	IPR002641; Patatin/Phospholipase A2-related	patatin-like phospholipase domain-containing protein 2; K16816 patatin-like phospholipase domain-containing protein 2 [EC:3.1.1.3] (A)	Patatin-like phospholipase domain-containing protein 4 OS=Homo sapiens GN=PNPLA4 PE=2 SV=3
	Sa6F.233	Sa110F.59	GO:0016020; membrane; Cellular Component::GO:0016021; integral to membrane; Cellular Component::GO:0022857; transmembrane transporter activity; Molecular Function::GO:0022891; substrate-specific transmembrane transporter activity; Molecular Function::GO:0055085; transmembrane transport; Biological Process	IPR003663; Sugar/inositol transporter::IPR005828; General substrate transporter::IPR020846; Major facilitator superfamily domain	inositol transporter 1; K08150 MFS transporter, SP family, solute carrier family 2 (myo-inositol transporter), member 13 (A)	D-xylose-proton symporter-like 2 OS=Arabidopsis thaliana GN=At5g17010 PE=1 SV=1
	Sa6F.233	Sa148F.36	GO:0006812; cation transport; Biological Process::GO:0008324; cation transmembrane transporter activity; Molecular Function::GO:0016021; integral to membrane; Cellular Component::GO:0055085; transmembrane transport; Biological Process	IPR002524; Cation efflux protein	Metal tolerance protein B1, putative isoform 1; K14689 solute carrier family 30 (zinc transporter), member 2 (A)	Metal tolerance protein B OS=Arabidopsis thaliana GN=MTPB PE=2 SV=1
	Sa6F.233	Sa161F.43	GO:0005215; transporter activity; Molecular Function::GO:0006810; transport; Biological Process::GO:0016020; membrane; Cellular Component::GO:0055085; transmembrane transport; Biological Process	IPR006043; Xanthine/uracil/vitamin C permease	adenine/guanine permease AZG1-like; K06901 putative MFS transporter, AGZA family, xanthine/uracil permease (A)	Adenine/guanine permease AZG1 OS=Arabidopsis thaliana GN=AZG1 PE=2 SV=1
	Sa6F.233	Sa162F.35	GO:0005543; phospholipid binding; Molecular Function	IPR011417; AP180 N-terminal homology (ANTH) domain::IPR013809; Epsin-like, N-terminal	hypothetical protein; K20043 clathrin coat assembly protein AP180 (A)	Putative clathrin assembly protein At2g01600 OS=Arabidopsis thaliana GN=At2g01600 PE=2 SV=2
	Sa13F.102	Sa17F.100	GO:0005515; protein binding; Molecular Function::GO:0005543; phospholipid binding; Molecular Function	IPR001849; Pleckstrin homology domain	sbf1, wu:fj45d12, zgc:92634; SET binding factor 1; K18061 myotubularin-related protein 5/13 (A)	Differentially expressed in FDCP 6 homolog OS=Xenopus laevis GN=def6 PE=2 SV=1
	Sa13F.102	Sa17F.32	GO:0005622; intracellular; Cellular Component::GO:0006886; intracellular protein transport; Biological Process	IPR002014; VHS::IPR004152; GAT::IPR018205; VHS subgroup	hepatocyte growth factor-regulated tyrosine kinase substrate-like; K12182 hepatocyte growth factor-regulated tyrosine kinase substrate (A)	TOM1-like protein 2 OS=Mus musculus GN=Tom1l2 PE=2 SV=1
	Sa13F.102	Sa18F.164	GO:0015078; hydrogen ion transmembrane transporter activity; Molecular Function::GO:0015991; ATP hydrolysis coupled proton transport; Biological Process::GO:0033180; proton-transporting V-type ATPase, V1 domain; Cellular Component	IPR004907; ATPase, V1 complex, subunit C	V-type proton ATPase subunit C; K02148 V-type H+-transporting ATPase subunit C (A)	V-type proton ATPase subunit C OS=Arabidopsis thaliana GN=VHA-C PE=1 SV=1
	Sa13F.102	Sa19F.116	GO:0003677; DNA binding; Molecular Function::GO:0003700; sequence-specific DNA binding transcription factor activity; Molecular Function::GO:0005634; nucleus; Cellular Component::GO:0006355; regulation of transcription, DNA-dependent; Biological Process::GO:0046983; protein dimerization activity; Molecular Function	IPR002100; Transcription factor, MADS-box::IPR002487; Transcription factor, K-box	MADS-box transcription factor 23; K09264 MADS-box transcription factor, plant (A)	Agamous-like MADS-box protein AGL21 OS=Arabidopsis thaliana GN=AGL21 PE=1 SV=1
	Sa13F.102	Sa19F.48	GO:0006952; defense response; Biological Process::GO:0016021; integral to membrane; Cellular Component	IPR004326; Mlo-related protein	MLO protein homolog 1-like; K08472 mlo protein (A)	MLO protein homolog 1 OS=Hordeum vulgare GN=MLO-H1 PE=3 SV=1
	Sa13F.102	Sa22F.121	GO:0005507; copper ion binding; Molecular Function::GO:0005758; mitochondrial intermembrane space; Cellular Component::GO:0006825; copper ion transport; Biological Process::GO:0016531; copper chaperone activity; Molecular Function	IPR007745; Cytochrome c oxidase copper chaperone	hypothetical protein; K02260 cytochrome c oxidase assembly protein subunit 17 (A)	Cytochrome c oxidase copper chaperone 1 OS=Arabidopsis thaliana GN=COX17-1 PE=2 SV=1
	Sa13F.102	Sa22F.181	GO:0004857; enzyme inhibitor activity; Molecular Function::GO:0005618; cell wall; Cellular Component::GO:0030599; pectinesterase activity; Molecular Function::GO:0042545; cell wall modification; Biological Process	IPR000070; Pectinesterase, catalytic::IPR006501; Pectinesterase inhibitor domain	Pectinesterase/pectinesterase inhibitor PPE8B; K01051 pectinesterase [EC:3.1.1.11] (A)	Pectinesterase/pectinesterase inhibitor PPE8B OS=Prunus persica PE=2 SV=1
	Sa13F.102	Sa22F.181	GO:0004857; enzyme inhibitor activity; Molecular Function::GO:0005618; cell wall; Cellular Component::GO:0030599; pectinesterase activity; Molecular Function::GO:0042545; cell wall modification; Biological Process	IPR000070; Pectinesterase, catalytic::IPR006501; Pectinesterase inhibitor domain	Pectinesterase/pectinesterase inhibitor PPE8B; K01051 pectinesterase [EC:3.1.1.11] (A)	Pectinesterase/pectinesterase inhibitor PPE8B OS=Prunus persica PE=2 SV=1
	Sa13F.102	Sa23F.279	GO:0005525; GTP binding; Molecular Function::GO:0005622; intracellular; Cellular Component::GO:0006886; intracellular protein transport; Biological Process::GO:0007264; small GTPase mediated signal transduction; Biological Process::GO:0015031; protein transport; Biological Process	IPR003579; Small GTPase superfamily, Rab type::IPR006687; Small GTPase superfamily, SAR1-type::IPR006689; Small GTPase superfamily, ARF/SAR type::IPR024156; Small GTPase superfamily, ARF type	hypothetical protein; K07977 Arf/Sar family, other (A)	ADP-ribosylation factor OS=Dugesia japonica PE=2 SV=3
	Sa13F.102	Sa23F.88	GO:0004857; enzyme inhibitor activity; Molecular Function::GO:0005618; cell wall; Cellular Component::GO:0030599; pectinesterase activity; Molecular Function::GO:0042545; cell wall modification; Biological Process	IPR000070; Pectinesterase, catalytic::IPR006501; Pectinesterase inhibitor domain	putative pectinesterase/pectinesterase inhibitor 24; K01051 pectinesterase [EC:3.1.1.11] (A)	Probable pectinesterase/pectinesterase inhibitor 46 OS=Arabidopsis thaliana GN=PME46 PE=2 SV=1
	Sa13F.102	Sa23F.88	GO:0004857; enzyme inhibitor activity; Molecular Function::GO:0005618; cell wall; Cellular Component::GO:0030599; pectinesterase activity; Molecular Function::GO:0042545; cell wall modification; Biological Process	IPR000070; Pectinesterase, catalytic::IPR006501; Pectinesterase inhibitor domain	putative pectinesterase/pectinesterase inhibitor 24; K01051 pectinesterase [EC:3.1.1.11] (A)	Probable pectinesterase/pectinesterase inhibitor 46 OS=Arabidopsis thaliana GN=PME46 PE=2 SV=1
	Sa13F.102	Sa26F.180	GO:0015031; protein transport; Biological Process	IPR005024; Snf7	POPTRDRAFT_833929; SNF7 family protein; K12198 charged multivesicular body protein 5 (A)	Charged multivesicular body protein 5 OS=Rattus norvegicus GN=Chmp5 PE=2 SV=1
	Sa13F.102	Sa28F.159	GO:0003677; DNA binding; Molecular Function::GO:0003700; sequence-specific DNA binding transcription factor activity; Molecular Function::GO:0005634; nucleus; Cellular Component::GO:0006355; regulation of transcription, DNA-dependent; Biological Process::GO:0046983; protein dimerization activity; Molecular Function	IPR002100; Transcription factor, MADS-box::IPR002487; Transcription factor, K-box	MADS-box transcription factor 23-like; K09264 MADS-box transcription factor, plant (A)	MADS-box transcription factor 27 OS=Oryza sativa subsp. japonica GN=MADS27 PE=2 SV=2
	Sa13F.102	Sa31F.82	GO:0003677; DNA binding; Molecular Function::GO:0003700; sequence-specific DNA binding transcription factor activity; Molecular Function::GO:0005634; nucleus; Cellular Component::GO:0006355; regulation of transcription, DNA-dependent; Biological Process::GO:0046983; protein dimerization activity; Molecular Function	IPR002100; Transcription factor, MADS-box::IPR002487; Transcription factor, K-box	MADS-box transcription factor 23-like; K09264 MADS-box transcription factor, plant (A)	Agamous-like MADS-box protein AGL21 OS=Arabidopsis thaliana GN=AGL21 PE=1 SV=1
	Sa13F.102	Sa34F.33	GO:0016021; integral to membrane; Cellular Component::GO:0016192; vesicle-mediated transport; Biological Process	IPR001388; Synaptobrevin::IPR010908; Longin domain	VAMP-like protein YKT61; K08516 synaptobrevin homolog YKT6 (A)	VAMP-like protein YKT61 OS=Arabidopsis thaliana GN=YKT61 PE=2 SV=1
	Sa13F.102	Sa35F.13	GO:0003924; GTPase activity; Molecular Function::GO:0005525; GTP binding; Molecular Function::GO:0005622; intracellular; Cellular Component::GO:0006184; GTP catabolic process; Biological Process::GO:0006886; intracellular protein transport; Biological Process::GO:0006913; nucleocytoplasmic transport; Biological Process::GO:0007165; signal transduction; Biological Process::GO:0007264; small GTPase…	IPR001806; Small GTPase superfamily::IPR002041; Ran GTPase::IPR003578; Small GTPase superfamily, Rho type::IPR003579; Small GTPase superfamily, Rab type::IPR020849; Small GTPase superfamily, Ras type	POPTRDRAFT_800974; Ras-related GTP-binding family protein; K07893 Ras-related protein Rab-6A (A)	Ras-related protein RABH1e OS=Arabidopsis thaliana GN=RABH1E PE=2 SV=1
	Sa13F.102	Sa38F.192	GO:0004221; ubiquitin thiolesterase activity; Molecular Function::GO:0006511; ubiquitin-dependent protein catabolic process; Biological Process	IPR001394; Ubiquitin carboxyl-terminal hydrolases family 2	ubiquitin carboxyl-terminal hydrolase 3; K11842 ubiquitin carboxyl-terminal hydrolase 12/46 [EC:3.4.19.12] (A)	Ubiquitin carboxyl-terminal hydrolase 4 OS=Arabidopsis thaliana GN=UBP4 PE=1 SV=2
	Sa13F.102	Sa38F.293	GO:0004221; ubiquitin thiolesterase activity; Molecular Function::GO:0005515; protein binding; Molecular Function::GO:0006511; ubiquitin-dependent protein catabolic process; Biological Process	IPR000626; Ubiquitin domain::IPR001394; Ubiquitin carboxyl-terminal hydrolases family 2::IPR019955; Ubiquitin supergroup	ubiquitin carboxyl-terminal hydrolase 6; K11843 ubiquitin carboxyl-terminal hydrolase 14 [EC:3.4.19.12] (A)	Ubiquitin carboxyl-terminal hydrolase 6 OS=Arabidopsis thaliana GN=UBP6 PE=1 SV=1
	Sa13F.102	Sa38F.75	GO:0003677; DNA binding; Molecular Function::GO:0003700; sequence-specific DNA binding transcription factor activity; Molecular Function::GO:0005634; nucleus; Cellular Component::GO:0006355; regulation of transcription, DNA-dependent; Biological Process::GO:0046983; protein dimerization activity; Molecular Function	IPR002100; Transcription factor, MADS-box::IPR002487; Transcription factor, K-box	agamous-like MADS-box protein AGL1; K09264 MADS-box transcription factor, plant (A)	MADS-box protein SVP OS=Arabidopsis thaliana GN=SVP PE=1 SV=1
	Sa13F.102	Sa40F.30	GO:0005750; mitochondrial respiratory chain complex III; Cellular Component::GO:0006122; mitochondrial electron transport, ubiquinol to cytochrome c; Biological Process	IPR003197; Cytochrome b-c1 complex subunit 7	cytochrome b-c1 complex subunit 7-2; K00417 ubiquinol-cytochrome c reductase subunit 7 (A)	Cytochrome b-c1 complex subunit 7-2 OS=Arabidopsis thaliana GN=QCR7-2 PE=1 SV=1
	Sa13F.102	Sa44F.163	GO:0003700; sequence-specific DNA binding transcription factor activity; Molecular Function::GO:0006351; transcription, DNA-dependent; Biological Process::GO:0006355; regulation of transcription, DNA-dependent; Biological Process::GO:0043565; sequence-specific DNA binding; Molecular Function	IPR004827; Basic-leucine zipper domain::IPR025422; Transcription factor TGA like domain	transcription factor HBP-1b(c38)-like; K14431 transcription factor TGA (A)	TGACG-sequence-specific DNA-binding protein TGA-2.1 OS=Nicotiana tabacum GN=TGA21 PE=1 SV=1
	Sa13F.102	Sa45F.71.2	GO:0015031; protein transport; Biological Process::GO:0016021; integral to membrane; Cellular Component	IPR007273; SCAMP	secretory carrier-associated membrane protein 3-like; K19995 secretory carrier-associated membrane protein (A)	Secretory carrier-associated membrane protein 3 OS=Arabidopsis thaliana GN=SCAMP3 PE=1 SV=1
	Sa13F.102	Sa49F.56	GO:0003700; sequence-specific DNA binding transcription factor activity; Molecular Function::GO:0006355; regulation of transcription, DNA-dependent; Biological Process	IPR001471; AP2/ERF domain	ethylene-responsive transcription factor RAP2-4; K09286 EREBP-like factor (A)	Ethylene-responsive transcription factor RAP2-4 OS=Arabidopsis thaliana GN=RAP2-4 PE=1 SV=1
	Sa13F.102	Sa52F.65	GO:0003700; sequence-specific DNA binding transcription factor activity; Molecular Function::GO:0006355; regulation of transcription, DNA-dependent; Biological Process	IPR001471; AP2/ERF domain	ethylene-responsive transcription factor RAP2-7-like; K09284 AP2-like factor, euAP2 lineage (A)	Floral homeotic protein APETALA 2 OS=Arabidopsis thaliana GN=AP2 PE=1 SV=1
	Sa13F.102	Sa55F.243	GO:0016021; integral to membrane; Cellular Component::GO:0055085; transmembrane transport; Biological Process	IPR004776; Auxin efflux carrier	probable auxin efflux carrier component 1b; K13947 auxin efflux carrier family (A)	Probable auxin efflux carrier component 1c OS=Oryza sativa subsp. japonica GN=PIN1C PE=2 SV=1
	Sa13F.102	Sa56F.37	GO:0016020; membrane; Cellular Component::GO:0048193; Golgi vesicle transport; Biological Process	IPR015260; Syntaxin 6, N-terminal	syntaxin-61; K08498 syntaxin 6 (A)	NA
	Sa13F.102	Sa60F.130	GO:0005509; calcium ion binding; Molecular Function::GO:0055085; transmembrane transport; Biological Process	IPR002048; EF-hand domain::IPR002067; Mitochondrial carrier protein::IPR011992; EF-hand domain pair::IPR018108; Mitochondrial substrate/solute carrier	calcium-binding mitochondrial carrier protein SCaMC-1-like; K14684 solute carrier family 25 (mitochondrial phosphate transporter), member 23/24/25/41 (A)	Calcium-binding mitochondrial carrier protein SCaMC-3 OS=Homo sapiens GN=SLC25A23 PE=1 SV=2
	Sa13F.102	Sa70F.89	GO:0003924; GTPase activity; Molecular Function::GO:0005525; GTP binding; Molecular Function::GO:0005622; intracellular; Cellular Component::GO:0006184; GTP catabolic process; Biological Process::GO:0006886; intracellular protein transport; Biological Process::GO:0006913; nucleocytoplasmic transport; Biological Process::GO:0007165; signal transduction; Biological Process::GO:0007264; small GTPase…	IPR001806; Small GTPase superfamily::IPR002041; Ran GTPase::IPR003578; Small GTPase superfamily, Rho type::IPR003579; Small GTPase superfamily, Rab type::IPR020849; Small GTPase superfamily, Ras type	ras-related protein RABA1f; K07904 Ras-related protein Rab-11A (A)	Ras-related protein RABA1f OS=Arabidopsis thaliana GN=RABA1F PE=2 SV=1
	Sa13F.102	Sa72F.104	GO:0005525; GTP binding; Molecular Function::GO:0005622; intracellular; Cellular Component::GO:0006886; intracellular protein transport; Biological Process::GO:0007264; small GTPase mediated signal transduction; Biological Process::GO:0015031; protein transport; Biological Process	IPR003579; Small GTPase superfamily, Rab type::IPR006687; Small GTPase superfamily, SAR1-type::IPR006689; Small GTPase superfamily, ARF/SAR type::IPR024156; Small GTPase superfamily, ARF type	ADP-ribosylation factor-like protein 5; K07950 ADP-ribosylation factor-like protein 5B (A)	ADP-ribosylation factor-like protein 5 OS=Dictyostelium discoideum GN=arl5 PE=3 SV=1
	Sa13F.102	Sa76F.29	GO:0006855; drug transmembrane transport; Biological Process::GO:0015238; drug transmembrane transporter activity; Molecular Function::GO:0015297; antiporter activity; Molecular Function::GO:0016020; membrane; Cellular Component::GO:0055085; transmembrane transport; Biological Process	IPR002528; Multi antimicrobial extrusion protein	MATE efflux family protein 8-like; K03327 multidrug resistance protein, MATE family (A)	MATE efflux family protein 9 OS=Arabidopsis thaliana GN=DTXL5 PE=2 SV=1
	Sa13F.102	Sa79F.158	GO:0003677; DNA binding; Molecular Function::GO:0003700; sequence-specific DNA binding transcription factor activity; Molecular Function::GO:0006355; regulation of transcription, DNA-dependent; Biological Process::GO:0043565; sequence-specific DNA binding; Molecular Function	IPR001356; Homeobox domain::IPR006563; POX domain::IPR008422; Homeobox KN domain	homeobox protein BEL1 homolog; K16670 homeobox protein Meis2 (A)	BEL1-like homeodomain protein 7 OS=Arabidopsis thaliana GN=BLH7 PE=2 SV=1
	Sa13F.102	Sa83F.85	GO:0016020; membrane; Cellular Component::GO:0016021; integral to membrane; Cellular Component::GO:0022857; transmembrane transporter activity; Molecular Function::GO:0022891; substrate-specific transmembrane transporter activity; Molecular Function::GO:0055085; transmembrane transport; Biological Process	IPR003663; Sugar/inositol transporter::IPR005828; General substrate transporter	sugar porter (SP) family MFS transporter; K08150 MFS transporter, SP family, solute carrier family 2 (myo-inositol transporter), member 13 (A)	Monosaccharide-sensing protein 2 OS=Arabidopsis thaliana GN=MSSP2 PE=1 SV=2
	Sa13F.102	Sa88F.80	GO:0015031; protein transport; Biological Process::GO:0016021; integral to membrane; Cellular Component	IPR007273; SCAMP	hypothetical protein; K19995 secretory carrier-associated membrane protein (A)	Secretory carrier-associated membrane protein 3 OS=Arabidopsis thaliana GN=SCAMP3 PE=1 SV=1
	Sa13F.102	Sa89F.38	GO:0055085; transmembrane transport; Biological Process	IPR004813; Oligopeptide transporter, OPT superfamily	NA	Oligopeptide transporter 7 OS=Arabidopsis thaliana GN=OPT7 PE=2 SV=1
	Sa13F.102	Sa95F.52	GO:0005783; endoplasmic reticulum; Cellular Component::GO:0006886; intracellular protein transport; Biological Process::GO:0016021; integral to membrane; Cellular Component	IPR008417; B-cell receptor-associated 31-like	hypothetical protein; K14009 B-cell receptor-associated protein 31 (A)	B-cell receptor-associated protein 31 OS=Homo sapiens GN=BCAP31 PE=1 SV=3
	Sa13F.102	Sa99F.163	GO:0006952; defense response; Biological Process::GO:0016021; integral to membrane; Cellular Component	IPR004326; Mlo-related protein	MLO-like protein 6; K08472 mlo protein (A)	MLO-like protein 6 OS=Arabidopsis thaliana GN=MLO6 PE=2 SV=2
	Sa13F.102	Sa100F.89	GO:0003700; sequence-specific DNA binding transcription factor activity; Molecular Function::GO:0006355; regulation of transcription, DNA-dependent; Biological Process	IPR001471; AP2/ERF domain	ethylene-responsive transcription factor RAP2-4; K09286 EREBP-like factor (A)	Ethylene-responsive transcription factor RAP2-4 OS=Arabidopsis thaliana GN=RAP2-4 PE=1 SV=1
	Sa13F.102	Sa102F.24	GO:0006629; lipid metabolic process; Biological Process	IPR002641; Patatin/Phospholipase A2-related	patatin-like phospholipase domain-containing protein 2; K16816 patatin-like phospholipase domain-containing protein 2 [EC:3.1.1.3] (A)	Patatin-like phospholipase domain-containing protein 4 OS=Homo sapiens GN=PNPLA4 PE=2 SV=3
	Sa13F.102	Sa110F.59	GO:0016020; membrane; Cellular Component::GO:0016021; integral to membrane; Cellular Component::GO:0022857; transmembrane transporter activity; Molecular Function::GO:0022891; substrate-specific transmembrane transporter activity; Molecular Function::GO:0055085; transmembrane transport; Biological Process	IPR003663; Sugar/inositol transporter::IPR005828; General substrate transporter::IPR020846; Major facilitator superfamily domain	inositol transporter 1; K08150 MFS transporter, SP family, solute carrier family 2 (myo-inositol transporter), member 13 (A)	D-xylose-proton symporter-like 2 OS=Arabidopsis thaliana GN=At5g17010 PE=1 SV=1
	Sa13F.102	Sa112F.112	GO:0003700; sequence-specific DNA binding transcription factor activity; Molecular Function::GO:0006351; transcription, DNA-dependent; Biological Process::GO:0006355; regulation of transcription, DNA-dependent; Biological Process::GO:0043565; sequence-specific DNA binding; Molecular Function	IPR004827; Basic-leucine zipper domain::IPR025422; Transcription factor TGA like domain	BZIP transcription factor family protein isoform 1; K14431 transcription factor TGA (A)	Transcription factor TGA4 OS=Arabidopsis thaliana GN=TGA4 PE=1 SV=2
	Sa13F.102	Sa116F.65	GO:0006629; lipid metabolic process; Biological Process::GO:0016788; hydrolase activity, acting on ester bonds; Molecular Function	IPR001087; Lipase, GDSL	GDSL-like Lipase/Acylhydrolase superfamily protein; K01206 alpha-L-fucosidase [EC:3.2.1.51] (A)	Alpha-L-fucosidase 3 OS=Arabidopsis thaliana GN=FXG1 PE=2 SV=1
	Sa13F.102	Sa143F.62	GO:0015078; hydrogen ion transmembrane transporter activity; Molecular Function::GO:0015991; ATP hydrolysis coupled proton transport; Biological Process::GO:0033179; proton-transporting V-type ATPase, V0 domain; Cellular Component	IPR002490; ATPase, V0 complex, subunit 116kDa	hypothetical protein; K02154 V-type H+-transporting ATPase subunit a (A)	V-type proton ATPase subunit a3 OS=Arabidopsis thaliana GN=VHA-a3 PE=1 SV=1
	Sa13F.102	Sa148F.36	GO:0006812; cation transport; Biological Process::GO:0008324; cation transmembrane transporter activity; Molecular Function::GO:0016021; integral to membrane; Cellular Component::GO:0055085; transmembrane transport; Biological Process	IPR002524; Cation efflux protein	Metal tolerance protein B1, putative isoform 1; K14689 solute carrier family 30 (zinc transporter), member 2 (A)	Metal tolerance protein B OS=Arabidopsis thaliana GN=MTPB PE=2 SV=1
	Sa13F.102	Sa148F.6	GO:0008610; lipid biosynthetic process; Biological Process	IPR003333; Mycolic acid cyclopropane synthase	(S)-coclaurine N-methyltransferase; K13384 (S)-coclaurine N-methyltransferase [EC:2.1.1.140] (A)	(S)-coclaurine N-methyltransferase OS=Thalictrum flavum subsp. glaucum PE=1 SV=1
	Sa13F.102	Sa161F.43	GO:0005215; transporter activity; Molecular Function::GO:0006810; transport; Biological Process::GO:0016020; membrane; Cellular Component::GO:0055085; transmembrane transport; Biological Process	IPR006043; Xanthine/uracil/vitamin C permease	adenine/guanine permease AZG1-like; K06901 putative MFS transporter, AGZA family, xanthine/uracil permease (A)	Adenine/guanine permease AZG1 OS=Arabidopsis thaliana GN=AZG1 PE=2 SV=1
	Sa13F.102	Sa164F.45	GO:0000139; Golgi membrane; Cellular Component::GO:0005801; cis-Golgi network; Cellular Component::GO:0006888; ER to Golgi vesicle-mediated transport; Biological Process::GO:0016021; integral to membrane; Cellular Component	IPR023601; Golgi SNAP receptor complex, subunit 1	Golgi SNAP receptor complex member 1-1; K08495 golgi SNAP receptor complex member 1 (A)	Golgi SNAP receptor complex member 1-1 OS=Arabidopsis thaliana GN=GOS11 PE=2 SV=1
	Sa13F.102	Sa175F.32	GO:0005525; GTP binding; Molecular Function::GO:0005622; intracellular; Cellular Component::GO:0006886; intracellular protein transport; Biological Process::GO:0007264; small GTPase mediated signal transduction; Biological Process::GO:0015031; protein transport; Biological Process	IPR003579; Small GTPase superfamily, Rab type::IPR006687; Small GTPase superfamily, SAR1-type::IPR006689; Small GTPase superfamily, ARF/SAR type::IPR024156; Small GTPase superfamily, ARF type	ADP-ribosylation factor-like protein 5; K07950 ADP-ribosylation factor-like protein 5B (A)	ADP-ribosylation factor-like protein 5 OS=Dictyostelium discoideum GN=arl5 PE=3 SV=1
	Sa14F.252.1	Sa19F.116	GO:0003677; DNA binding; Molecular Function::GO:0003700; sequence-specific DNA binding transcription factor activity; Molecular Function::GO:0005634; nucleus; Cellular Component::GO:0006355; regulation of transcription, DNA-dependent; Biological Process::GO:0046983; protein dimerization activity; Molecular Function	IPR002100; Transcription factor, MADS-box::IPR002487; Transcription factor, K-box	MADS-box transcription factor 23; K09264 MADS-box transcription factor, plant (A)	Agamous-like MADS-box protein AGL21 OS=Arabidopsis thaliana GN=AGL21 PE=1 SV=1
	Sa14F.252.1	Sa20F.50	GO:0003677; DNA binding; Molecular Function::GO:0003700; sequence-specific DNA binding transcription factor activity; Molecular Function::GO:0006355; regulation of transcription, DNA-dependent; Biological Process	IPR001471; AP2/ERF domain::IPR003340; B3 DNA binding domain	AP2/ERF and B3 domain-containing transcription factor RAV1-like; K09287 RAV-like factor (A)	AP2/ERF and B3 domain-containing transcription repressor TEM1 OS=Arabidopsis thaliana GN=TEM1 PE=1 SV=1
	Sa14F.252.1	Sa22F.121	GO:0005507; copper ion binding; Molecular Function::GO:0005758; mitochondrial intermembrane space; Cellular Component::GO:0006825; copper ion transport; Biological Process::GO:0016531; copper chaperone activity; Molecular Function	IPR007745; Cytochrome c oxidase copper chaperone	hypothetical protein; K02260 cytochrome c oxidase assembly protein subunit 17 (A)	Cytochrome c oxidase copper chaperone 1 OS=Arabidopsis thaliana GN=COX17-1 PE=2 SV=1
	Sa14F.252.1	Sa23F.88	GO:0004857; enzyme inhibitor activity; Molecular Function::GO:0005618; cell wall; Cellular Component::GO:0030599; pectinesterase activity; Molecular Function::GO:0042545; cell wall modification; Biological Process	IPR000070; Pectinesterase, catalytic::IPR006501; Pectinesterase inhibitor domain	putative pectinesterase/pectinesterase inhibitor 24; K01051 pectinesterase [EC:3.1.1.11] (A)	Probable pectinesterase/pectinesterase inhibitor 46 OS=Arabidopsis thaliana GN=PME46 PE=2 SV=1
	Sa14F.252.1	Sa23F.88	GO:0004857; enzyme inhibitor activity; Molecular Function::GO:0005618; cell wall; Cellular Component::GO:0030599; pectinesterase activity; Molecular Function::GO:0042545; cell wall modification; Biological Process	IPR000070; Pectinesterase, catalytic::IPR006501; Pectinesterase inhibitor domain	putative pectinesterase/pectinesterase inhibitor 24; K01051 pectinesterase [EC:3.1.1.11] (A)	Probable pectinesterase/pectinesterase inhibitor 46 OS=Arabidopsis thaliana GN=PME46 PE=2 SV=1
	Sa14F.252.1	Sa37F.129	GO:0005737; cytoplasm; Cellular Component::GO:0017089; glycolipid transporter activity; Molecular Function::GO:0046836; glycolipid transport; Biological Process::GO:0051861; glycolipid binding; Molecular Function	IPR014830; Glycolipid transfer protein domain	pleckstrin homology domain-containing family A member 8; K08051 pleckstrin homology domain containing, family A (phosphoinositide binding specific) member 8 (A)	Glycolipid transfer protein 2 OS=Arabidopsis thaliana GN=GLTP2 PE=2 SV=1
	Sa14F.252.1	Sa37F.129	GO:0005737; cytoplasm; Cellular Component::GO:0017089; glycolipid transporter activity; Molecular Function::GO:0046836; glycolipid transport; Biological Process::GO:0051861; glycolipid binding; Molecular Function	IPR014830; Glycolipid transfer protein domain	pleckstrin homology domain-containing family A member 8; K08051 pleckstrin homology domain containing, family A (phosphoinositide binding specific) member 8 (A)	Glycolipid transfer protein 2 OS=Arabidopsis thaliana GN=GLTP2 PE=2 SV=1
	Sa14F.252.1	Sa52F.65	GO:0003700; sequence-specific DNA binding transcription factor activity; Molecular Function::GO:0006355; regulation of transcription, DNA-dependent; Biological Process	IPR001471; AP2/ERF domain	ethylene-responsive transcription factor RAP2-7-like; K09284 AP2-like factor, euAP2 lineage (A)	Floral homeotic protein APETALA 2 OS=Arabidopsis thaliana GN=AP2 PE=1 SV=1
	Sa14F.252.1	Sa53F.153	GO:0005622; intracellular; Cellular Component::GO:0006886; intracellular protein transport; Biological Process	IPR004152; GAT	NA	TOM1-like protein 2 OS=Xenopus laevis GN=tom1l2 PE=2 SV=1
	Sa14F.252.1	Sa70F.89	GO:0003924; GTPase activity; Molecular Function::GO:0005525; GTP binding; Molecular Function::GO:0005622; intracellular; Cellular Component::GO:0006184; GTP catabolic process; Biological Process::GO:0006886; intracellular protein transport; Biological Process::GO:0006913; nucleocytoplasmic transport; Biological Process::GO:0007165; signal transduction; Biological Process::GO:0007264; small GTPase…	IPR001806; Small GTPase superfamily::IPR002041; Ran GTPase::IPR003578; Small GTPase superfamily, Rho type::IPR003579; Small GTPase superfamily, Rab type::IPR020849; Small GTPase superfamily, Ras type	ras-related protein RABA1f; K07904 Ras-related protein Rab-11A (A)	Ras-related protein RABA1f OS=Arabidopsis thaliana GN=RABA1F PE=2 SV=1
	Sa14F.252.1	Sa76F.29	GO:0006855; drug transmembrane transport; Biological Process::GO:0015238; drug transmembrane transporter activity; Molecular Function::GO:0015297; antiporter activity; Molecular Function::GO:0016020; membrane; Cellular Component::GO:0055085; transmembrane transport; Biological Process	IPR002528; Multi antimicrobial extrusion protein	MATE efflux family protein 8-like; K03327 multidrug resistance protein, MATE family (A)	MATE efflux family protein 9 OS=Arabidopsis thaliana GN=DTXL5 PE=2 SV=1
	Sa14F.252.1	Sa79F.158	GO:0003677; DNA binding; Molecular Function::GO:0003700; sequence-specific DNA binding transcription factor activity; Molecular Function::GO:0006355; regulation of transcription, DNA-dependent; Biological Process::GO:0043565; sequence-specific DNA binding; Molecular Function	IPR001356; Homeobox domain::IPR006563; POX domain::IPR008422; Homeobox KN domain	homeobox protein BEL1 homolog; K16670 homeobox protein Meis2 (A)	BEL1-like homeodomain protein 7 OS=Arabidopsis thaliana GN=BLH7 PE=2 SV=1
	Sa14F.252.1	Sa79F.71	GO:0006855; drug transmembrane transport; Biological Process::GO:0015238; drug transmembrane transporter activity; Molecular Function::GO:0015297; antiporter activity; Molecular Function::GO:0016020; membrane; Cellular Component::GO:0055085; transmembrane transport; Biological Process	IPR002528; Multi antimicrobial extrusion protein	protein TRANSPARENT TESTA 12-like; K03327 multidrug resistance protein, MATE family (A)	Protein TRANSPARENT TESTA 12 OS=Arabidopsis thaliana GN=TT12 PE=2 SV=1
	Sa14F.252.1	Sa83F.85	GO:0016020; membrane; Cellular Component::GO:0016021; integral to membrane; Cellular Component::GO:0022857; transmembrane transporter activity; Molecular Function::GO:0022891; substrate-specific transmembrane transporter activity; Molecular Function::GO:0055085; transmembrane transport; Biological Process	IPR003663; Sugar/inositol transporter::IPR005828; General substrate transporter	sugar porter (SP) family MFS transporter; K08150 MFS transporter, SP family, solute carrier family 2 (myo-inositol transporter), member 13 (A)	Monosaccharide-sensing protein 2 OS=Arabidopsis thaliana GN=MSSP2 PE=1 SV=2
	Sa14F.252.1	Sa88F.80	GO:0015031; protein transport; Biological Process::GO:0016021; integral to membrane; Cellular Component	IPR007273; SCAMP	hypothetical protein; K19995 secretory carrier-associated membrane protein (A)	Secretory carrier-associated membrane protein 3 OS=Arabidopsis thaliana GN=SCAMP3 PE=1 SV=1
	Sa14F.252.1	Sa92F.66	GO:0003700; sequence-specific DNA binding transcription factor activity; Molecular Function::GO:0006355; regulation of transcription, DNA-dependent; Biological Process::GO:0043565; sequence-specific DNA binding; Molecular Function	IPR003657; DNA-binding WRKY	probable WRKY transcription factor 26; K13424 WRKY transcription factor 33 (A)	Probable WRKY transcription factor 61 OS=Arabidopsis thaliana GN=WRKY61 PE=2 SV=1
	Sa14F.252.1	Sa95F.52	GO:0005783; endoplasmic reticulum; Cellular Component::GO:0006886; intracellular protein transport; Biological Process::GO:0016021; integral to membrane; Cellular Component	IPR008417; B-cell receptor-associated 31-like	hypothetical protein; K14009 B-cell receptor-associated protein 31 (A)	B-cell receptor-associated protein 31 OS=Homo sapiens GN=BCAP31 PE=1 SV=3
	Sa14F.252.1	Sa98F.40	GO:0000166; nucleotide binding; Molecular Function::GO:0006812; cation transport; Biological Process::GO:0016021; integral to membrane; Cellular Component::GO:0019829; cation-transporting ATPase activity; Molecular Function::GO:0030001; metal ion transport; Biological Process::GO:0046872; metal ion binding; Molecular Function	IPR001757; Cation-transporting P-type ATPase::IPR006121; Heavy metal-associated domain, HMA::IPR008250; P-type ATPase, A domain::IPR023214; HAD-like domain::IPR027265; Divalent cation-transporting P-type ATPase	hypothetical protein; K01534 Cd2+/Zn2+-exporting ATPase [EC:3.6.3.3 3.6.3.5] (A)	Cadmium/zinc-transporting ATPase HMA2 OS=Arabidopsis thaliana GN=HMA2 PE=2 SV=1
	Sa14F.252.1	Sa99F.163	GO:0006952; defense response; Biological Process::GO:0016021; integral to membrane; Cellular Component	IPR004326; Mlo-related protein	MLO-like protein 6; K08472 mlo protein (A)	MLO-like protein 6 OS=Arabidopsis thaliana GN=MLO6 PE=2 SV=2
	Sa14F.252.1	Sa110F.59	GO:0016020; membrane; Cellular Component::GO:0016021; integral to membrane; Cellular Component::GO:0022857; transmembrane transporter activity; Molecular Function::GO:0022891; substrate-specific transmembrane transporter activity; Molecular Function::GO:0055085; transmembrane transport; Biological Process	IPR003663; Sugar/inositol transporter::IPR005828; General substrate transporter::IPR020846; Major facilitator superfamily domain	inositol transporter 1; K08150 MFS transporter, SP family, solute carrier family 2 (myo-inositol transporter), member 13 (A)	D-xylose-proton symporter-like 2 OS=Arabidopsis thaliana GN=At5g17010 PE=1 SV=1
	Sa14F.252.1	Sa148F.36	GO:0006812; cation transport; Biological Process::GO:0008324; cation transmembrane transporter activity; Molecular Function::GO:0016021; integral to membrane; Cellular Component::GO:0055085; transmembrane transport; Biological Process	IPR002524; Cation efflux protein	Metal tolerance protein B1, putative isoform 1; K14689 solute carrier family 30 (zinc transporter), member 2 (A)	Metal tolerance protein B OS=Arabidopsis thaliana GN=MTPB PE=2 SV=1
	Sa14F.252.1	Sa148F.6	GO:0008610; lipid biosynthetic process; Biological Process	IPR003333; Mycolic acid cyclopropane synthase	(S)-coclaurine N-methyltransferase; K13384 (S)-coclaurine N-methyltransferase [EC:2.1.1.140] (A)	(S)-coclaurine N-methyltransferase OS=Thalictrum flavum subsp. glaucum PE=1 SV=1
	Sa14F.252.1	Sa161F.43	GO:0005215; transporter activity; Molecular Function::GO:0006810; transport; Biological Process::GO:0016020; membrane; Cellular Component::GO:0055085; transmembrane transport; Biological Process	IPR006043; Xanthine/uracil/vitamin C permease	adenine/guanine permease AZG1-like; K06901 putative MFS transporter, AGZA family, xanthine/uracil permease (A)	Adenine/guanine permease AZG1 OS=Arabidopsis thaliana GN=AZG1 PE=2 SV=1
	Sa26F.146	Sa29F.234	GO:0005515; protein binding; Molecular Function::GO:0005622; intracellular; Cellular Component::GO:0006888; ER to Golgi vesicle-mediated transport; Biological Process	IPR004045; Glutathione S-transferase, N-terminal::IPR006722; Sedlin	glutathione S-transferase DHAR3, chloroplastic-like; K05022 chloride intracellular channel protein 2 (A)	Glutathione S-transferase DHAR3, chloroplastic OS=Arabidopsis thaliana GN=DHAR3 PE=1 SV=1
	Sa26F.146	Sa30F.189	GO:0003677; DNA binding; Molecular Function::GO:0003700; sequence-specific DNA binding transcription factor activity; Molecular Function::GO:0006352; DNA-dependent transcription, initiation; Biological Process::GO:0006355; regulation of transcription, DNA-dependent; Biological Process::GO:0016987; sigma factor activity; Molecular Function	IPR000943; RNA polymerase sigma-70::IPR007624; RNA polymerase sigma-70 region 3::IPR007627; RNA polymerase sigma-70 region 2::IPR007630; RNA polymerase sigma-70 region 4	hypothetical protein; K03093 RNA polymerase sigma factor (A)	RNA polymerase sigma factor sigC OS=Arabidopsis thaliana GN=SIGC PE=2 SV=1
	Sa26F.146	Sa33F.226	GO:0005215; transporter activity; Molecular Function::GO:0006810; transport; Biological Process::GO:0016020; membrane; Cellular Component	IPR000109; Proton-dependent oligopeptide transporter family	nitrate transporter 1.1-like; K14638 solute carrier family 15 (peptide/histidine transporter), member 3/4 (A)	Protein NRT1/ PTR FAMILY 6.3 OS=Arabidopsis thaliana GN=NPF6.3 PE=1 SV=1
	Sa26F.146	Sa38F.43	GO:0015078; hydrogen ion transmembrane transporter activity; Molecular Function::GO:0015991; ATP hydrolysis coupled proton transport; Biological Process::GO:0033177; proton-transporting two-sector ATPase complex, proton-transporting domain; Cellular Component::GO:0033179; proton-transporting V-type ATPase, V0 domain; Cellular Component	IPR000245; V-ATPase proteolipid subunit::IPR002379; V-ATPase proteolipid subunit C-like domain	V-type proton ATPase 16 kDa proteolipid subunit; K02155 V-type H+-transporting ATPase 16kDa proteolipid subunit (A)	V-type proton ATPase 16 kDa proteolipid subunit OS=Kalanchoe daigremontiana PE=2 SV=1
	Sa26F.146	Sa40F.114	GO:0016020; membrane; Cellular Component::GO:0016021; integral to membrane; Cellular Component::GO:0022857; transmembrane transporter activity; Molecular Function::GO:0022891; substrate-specific transmembrane transporter activity; Molecular Function::GO:0055085; transmembrane transport; Biological Process	IPR003663; Sugar/inositol transporter::IPR005828; General substrate transporter::IPR020846; Major facilitator superfamily domain	solute carrier family 2, facilitated glucose transporter member 8; K08145 MFS transporter, SP family, solute carrier family 2 (facilitated glucose transporter), member 8 (A)	D-xylose-proton symporter-like 3, chloroplastic OS=Arabidopsis thaliana GN=At5g59250 PE=2 SV=2
	Sa26F.146	Sa40F.115	GO:0016020; membrane; Cellular Component::GO:0016021; integral to membrane; Cellular Component::GO:0022857; transmembrane transporter activity; Molecular Function::GO:0022891; substrate-specific transmembrane transporter activity; Molecular Function::GO:0055085; transmembrane transport; Biological Process	IPR003663; Sugar/inositol transporter::IPR005828; General substrate transporter::IPR020846; Major facilitator superfamily domain	hypothetical protein; K08149 MFS transporter, SP family, solute carrier family 2 (facilitated glucose transporter), member 12 (A)	D-xylose-proton symporter-like 3, chloroplastic OS=Arabidopsis thaliana GN=At5g59250 PE=2 SV=2
	Sa26F.146	Sa41F.157	GO:0008565; protein transporter activity; Molecular Function::GO:0015031; protein transport; Biological Process	IPR003369; Sec-independent protein translocase protein TatA/B/E	sec-independent protein translocase protein TATA, chloroplastic-like; K03116 sec-independent protein translocase protein TatA (A)	Sec-independent protein translocase protein TATA, chloroplastic OS=Pisum sativum GN=TATA PE=1 SV=1
	Sa26F.146	Sa42F.117	GO:0016021; integral to membrane; Cellular Component::GO:0055085; transmembrane transport; Biological Process	IPR004776; Auxin efflux carrier	hypothetical protein; K01807 ribose 5-phosphate isomerase A [EC:5.3.1.6] (A)	Uncharacterized transporter C5D6.04 OS=Schizosaccharomyces pombe (strain 972 / ATCC 24843) GN=SPAC5D6.04 PE=3 SV=1
	Sa26F.146	Sa42F.131	GO:0003924; GTPase activity; Molecular Function::GO:0005525; GTP binding; Molecular Function::GO:0005622; intracellular; Cellular Component::GO:0006184; GTP catabolic process; Biological Process::GO:0006886; intracellular protein transport; Biological Process::GO:0006913; nucleocytoplasmic transport; Biological Process::GO:0007165; signal transduction; Biological Process::GO:0007264; small GTPase…	IPR001806; Small GTPase superfamily::IPR002041; Ran GTPase::IPR003578; Small GTPase superfamily, Rho type::IPR003579; Small GTPase superfamily, Rab type::IPR020849; Small GTPase superfamily, Ras type	ras-related protein RABC2a; K07910 Ras-related protein Rab-18 (A)	Ras-related protein RABC2a OS=Arabidopsis thaliana GN=RABC2A PE=1 SV=1
	Sa26F.146	Sa46F.261	GO:0008565; protein transporter activity; Molecular Function::GO:0009306; protein secretion; Biological Process::GO:0015031; protein transport; Biological Process::GO:0016020; membrane; Cellular Component	IPR003369; Sec-independent protein translocase protein TatA/B/E::IPR003998; Twin-arginine translocation protein TatB-like	sec-independent protein translocase protein TATA, chloroplastic; K03116 sec-independent protein translocase protein TatA (A)	Sec-independent protein translocase protein TATA, chloroplastic OS=Zea mays GN=TATA PE=1 SV=1
	Sa26F.146	Sa52F.108	GO:0016021; integral to membrane; Cellular Component::GO:0055085; transmembrane transport; Biological Process	IPR011701; Major facilitator superfamily::IPR020846; Major facilitator superfamily domain	sodium-dependent phosphate transport protein 1, chloroplastic-like; K08193 MFS transporter, ACS family, solute carrier family 17 (sodium-dependent inorganic phosphate cotransporter), other (A)	Sodium-dependent phosphate transport protein 1, chloroplastic OS=Arabidopsis thaliana GN=ANTR1 PE=1 SV=1
	Sa26F.146	Sa56F.106	GO:0006814; sodium ion transport; Biological Process::GO:0008508; bile acid:sodium symporter activity; Molecular Function::GO:0016020; membrane; Cellular Component	IPR002657; Bile acid:sodium symporter	sodium/pyruvate cotransporter BASS2, chloroplastic-like; K03453 bile acid:Na+ symporter, BASS family (A)	Sodium/pyruvate cotransporter BASS2, chloroplastic OS=Arabidopsis thaliana GN=BASS2 PE=2 SV=1
	Sa26F.146	Sa56F.141	GO:0006886; intracellular protein transport; Biological Process	IPR000744; NSF attachment protein	alpha-soluble NSF attachment protein-like; K15296 alpha-soluble NSF attachment protein (A)	Alpha-soluble NSF attachment protein OS=Vitis vinifera PE=2 SV=1
	Sa26F.146	Sa57F.51	GO:0006952; defense response; Biological Process::GO:0009607; response to biotic stimulus; Biological Process	IPR000916; Bet v I domain::IPR024948; Major latex protein domain	NA	MLP-like protein 43 OS=Arabidopsis thaliana GN=MLP43 PE=1 SV=1
	Sa26F.146	Sa66F.12	GO:0006605; protein targeting; Biological Process::GO:0006886; intracellular protein transport; Biological Process::GO:0016020; membrane; Cellular Component	IPR001901; Protein translocase complex, SecE/Sec61-gamma subunit	NA	Preprotein translocase subunit SECE1 OS=Arabidopsis thaliana GN=SECE1 PE=1 SV=1
	Sa26F.146	Sa71F.112	GO:0005247; voltage-gated chloride channel activity; Molecular Function::GO:0006821; chloride transport; Biological Process::GO:0016020; membrane; Cellular Component::GO:0030554; adenyl nucleotide binding; Molecular Function::GO:0055085; transmembrane transport; Biological Process	IPR000644; CBS domain::IPR001807; Chloride channel, voltage gated	DEHA2F11572p; K05012 chloride channel 3/4/5 (A)	Chloride channel protein CLC-e OS=Arabidopsis thaliana GN=CLC-E PE=2 SV=2
	Sa26F.146	Sa74F.23	GO:0000166; nucleotide binding; Molecular Function::GO:0005524; ATP binding; Molecular Function::GO:0006810; transport; Biological Process::GO:0016021; integral to membrane; Cellular Component::GO:0016887; ATPase activity; Molecular Function::GO:0017111; nucleoside-triphosphatase activity; Molecular Function::GO:0042626; ATPase activity, coupled to transmembrane movement of substances; Molecular …	IPR001140; ABC transporter, transmembrane domain::IPR003439; ABC transporter-like::IPR003593; AAA+ ATPase domain::IPR017940; ABC transporter, integral membrane type 1	ABC transporter B family member 28; K05655 ATP-binding cassette, subfamily B (MDR/TAP), member 8 (A)	ABC transporter B family member 28 OS=Arabidopsis thaliana GN=ABCB28 PE=2 SV=1
	Sa26F.146	Sa79F.141	GO:0006629; lipid metabolic process; Biological Process::GO:0016788; hydrolase activity, acting on ester bonds; Molecular Function	IPR001087; Lipase, GDSL	hypothetical protein; K00679 phospholipid:diacylglycerol acyltransferase [EC:2.3.1.158] (A)	GDSL esterase/lipase EXL1 OS=Arabidopsis thaliana GN=EXL1 PE=2 SV=1
	Sa26F.146	Sa79F.74	GO:0005315; inorganic phosphate transmembrane transporter activity; Molecular Function::GO:0006817; phosphate ion transport; Biological Process::GO:0016020; membrane; Cellular Component	IPR001204; Phosphate transporter	inorganic phosphate transporter 2-1, chloroplastic; K14640 solute carrier family 20 (sodium-dependent phosphate transporter) (A)	Inorganic phosphate transporter 2-1, chloroplastic OS=Arabidopsis thaliana GN=PHT2-1 PE=1 SV=1
	Sa26F.146	Sa80F.105	GO:0006605; protein targeting; Biological Process::GO:0006886; intracellular protein transport; Biological Process::GO:0016020; membrane; Cellular Component	IPR001901; Protein translocase complex, SecE/Sec61-gamma subunit	NA	Preprotein translocase subunit SECE1 OS=Arabidopsis thaliana GN=SECE1 PE=1 SV=1
	Sa26F.146	Sa80F.40	GO:0003700; sequence-specific DNA binding transcription factor activity; Molecular Function::GO:0006355; regulation of transcription, DNA-dependent; Biological Process::GO:0043565; sequence-specific DNA binding; Molecular Function	IPR001356; Homeobox domain::IPR002913; START domain	homeobox-leucine zipper protein MERISTEM L1; K09338 homeobox-leucine zipper protein (A)	Homeobox-leucine zipper protein MERISTEM L1 OS=Arabidopsis thaliana GN=ATML1 PE=2 SV=1
	Sa26F.146	Sa81F.167	GO:0003677; DNA binding; Molecular Function::GO:0003700; sequence-specific DNA binding transcription factor activity; Molecular Function::GO:0006352; DNA-dependent transcription, initiation; Biological Process::GO:0006355; regulation of transcription, DNA-dependent; Biological Process::GO:0016987; sigma factor activity; Molecular Function	IPR000943; RNA polymerase sigma-70::IPR007624; RNA polymerase sigma-70 region 3::IPR007630; RNA polymerase sigma-70 region 4	RNA polymerase sigma factor sigC-like; K03093 RNA polymerase sigma factor (A)	RNA polymerase sigma factor sigD, chloroplastic OS=Arabidopsis thaliana GN=SIGD PE=2 SV=1
	Sa26F.146	Sa82F.15	GO:0004190; aspartic-type endopeptidase activity; Molecular Function::GO:0006508; proteolysis; Biological Process::GO:0006629; lipid metabolic process; Biological Process	IPR001461; Peptidase A1::IPR007856; Saposin-like type B, 1::IPR008138; Saposin-like type B, 2::IPR008139; Saposin B	aspartic proteinase-like; K08245 phytepsin [EC:3.4.23.40] (A)	Aspartic proteinase A1 OS=Arabidopsis thaliana GN=APA1 PE=1 SV=1
	Sa26F.146	Sa86F.128	GO:0008565; protein transporter activity; Molecular Function::GO:0009306; protein secretion; Biological Process::GO:0015031; protein transport; Biological Process::GO:0016020; membrane; Cellular Component	IPR003369; Sec-independent protein translocase protein TatA/B/E::IPR003998; Twin-arginine translocation protein TatB-like	sec-independent protein translocase protein TATA, chloroplastic; K03116 sec-independent protein translocase protein TatA (A)	Sec-independent protein translocase protein TATA, chloroplastic OS=Zea mays GN=TATA PE=1 SV=1
	Sa26F.146	Sa92F.29	GO:0006457; protein folding; Biological Process::GO:0015031; protein transport; Biological Process	IPR008881; Trigger factor, ribosome-binding, bacterial	NA	Trigger factor OS=Thermosynechococcus elongatus (strain BP-1) GN=tig PE=3 SV=1
	Sa26F.146	Sa122F.62	GO:0015031; protein transport; Biological Process::GO:0016020; membrane; Cellular Component	IPR002208; SecY/SEC61-alpha family	protein translocase secy subunit, putative; K10956 protein transport protein SEC61 subunit alpha (A)	Preprotein translocase subunit SCY1, chloroplastic OS=Arabidopsis thaliana GN=SCY1 PE=1 SV=2
	Sa26F.146	Sa126F.92	GO:0000139; Golgi membrane; Cellular Component::GO:0005801; cis-Golgi network; Cellular Component::GO:0006888; ER to Golgi vesicle-mediated transport; Biological Process::GO:0016021; integral to membrane; Cellular Component	IPR023601; Golgi SNAP receptor complex, subunit 1	Golgi SNAP receptor complex member 1-1; K08495 golgi SNAP receptor complex member 1 (A)	Golgi SNAP receptor complex member 1-1 OS=Arabidopsis thaliana GN=GOS11 PE=2 SV=1
	Sa26F.146	Sa135F.11	GO:0003677; DNA binding; Molecular Function::GO:0003700; sequence-specific DNA binding transcription factor activity; Molecular Function::GO:0006352; DNA-dependent transcription, initiation; Biological Process::GO:0006355; regulation of transcription, DNA-dependent; Biological Process::GO:0016987; sigma factor activity; Molecular Function	IPR000943; RNA polymerase sigma-70::IPR007624; RNA polymerase sigma-70 region 3::IPR007627; RNA polymerase sigma-70 region 2::IPR007630; RNA polymerase sigma-70 region 4	hypothetical protein; K03086 RNA polymerase primary sigma factor (A)	RNA polymerase sigma factor sigF, chloroplastic OS=Arabidopsis thaliana GN=SIGF PE=1 SV=1
	Sa26F.146	Sa145F.42	GO:0000976; transcription regulatory region sequence-specific DNA binding; Molecular Function::GO:0003700; sequence-specific DNA binding transcription factor activity; Molecular Function::GO:0006355; regulation of transcription, DNA-dependent; Biological Process::GO:0043565; sequence-specific DNA binding; Molecular Function	IPR000047; Helix-turn-helix motif::IPR001356; Homeobox domain	homeobox-leucine zipper protein MERISTEM L1; K09338 homeobox-leucine zipper protein (A)	Homeobox-leucine zipper protein PROTODERMAL FACTOR 2 OS=Arabidopsis thaliana GN=PDF2 PE=2 SV=1
	Sa26F.146	Sa155F.68.1	GO:0008565; protein transporter activity; Molecular Function::GO:0009306; protein secretion; Biological Process::GO:0015031; protein transport; Biological Process::GO:0016020; membrane; Cellular Component	IPR003369; Sec-independent protein translocase protein TatA/B/E::IPR003998; Twin-arginine translocation protein TatB-like	hypothetical protein; K03116 sec-independent protein translocase protein TatA (A)	Sec-independent protein translocase protein TATB, chloroplastic OS=Pisum sativum GN=TATB PE=1 SV=1
	Sa26F.146	Sa156F.52	GO:0003333; amino acid transmembrane transport; Biological Process::GO:0015171; amino acid transmembrane transporter activity; Molecular Function::GO:0016020; membrane; Cellular Component	IPR002293; Amino acid/polyamine transporter I	An09g05010; choline transport protein; K19564 choline transport protein (A)	Amino-acid permease BAT1 homolog OS=Oryza sativa subsp. japonica GN=BAT1 PE=2 SV=1
	Sa26F.146	Sa161F.36	GO:0008519; ammonium transmembrane transporter activity; Molecular Function::GO:0015696; ammonium transport; Biological Process::GO:0016020; membrane; Cellular Component::GO:0072488; ammonium transmembrane transport; Biological Process	IPR001905; Ammonium transporter::IPR024041; Ammonium transporter AmtB-like domain	ammonium transporter 1 member 3-like; K03320 ammonium transporter, Amt family (A)	Ammonium transporter 1 member 3 OS=Solanum lycopersicum GN=AMT1-3 PE=2 SV=1
	Sa26F.146	Sa161F.41	GO:0005215; transporter activity; Molecular Function::GO:0006810; transport; Biological Process::GO:0016020; membrane; Cellular Component	IPR000109; Proton-dependent oligopeptide transporter family	oligopeptide transporter, putative; K14638 solute carrier family 15 (peptide/histidine transporter), member 3/4 (A)	Protein NRT1/ PTR FAMILY 5.1 OS=Arabidopsis thaliana GN=NPF5.1 PE=2 SV=2
	Sa26F.146	Sa193F.40	GO:0003700; sequence-specific DNA binding transcription factor activity; Molecular Function::GO:0006355; regulation of transcription, DNA-dependent; Biological Process::GO:0043565; sequence-specific DNA binding; Molecular Function	IPR001356; Homeobox domain::IPR002913; START domain	homeobox-leucine zipper protein HDG2-like; K09338 homeobox-leucine zipper protein (A)	Homeobox-leucine zipper protein HDG2 OS=Arabidopsis thaliana GN=HDG2 PE=2 SV=1
	Sa28F.36	Sa30F.189	GO:0003677; DNA binding; Molecular Function::GO:0003700; sequence-specific DNA binding transcription factor activity; Molecular Function::GO:0006352; DNA-dependent transcription, initiation; Biological Process::GO:0006355; regulation of transcription, DNA-dependent; Biological Process::GO:0016987; sigma factor activity; Molecular Function	IPR000943; RNA polymerase sigma-70::IPR007624; RNA polymerase sigma-70 region 3::IPR007627; RNA polymerase sigma-70 region 2::IPR007630; RNA polymerase sigma-70 region 4	hypothetical protein; K03093 RNA polymerase sigma factor (A)	RNA polymerase sigma factor sigC OS=Arabidopsis thaliana GN=SIGC PE=2 SV=1
	Sa28F.36	Sa33F.226	GO:0005215; transporter activity; Molecular Function::GO:0006810; transport; Biological Process::GO:0016020; membrane; Cellular Component	IPR000109; Proton-dependent oligopeptide transporter family	nitrate transporter 1.1-like; K14638 solute carrier family 15 (peptide/histidine transporter), member 3/4 (A)	Protein NRT1/ PTR FAMILY 6.3 OS=Arabidopsis thaliana GN=NPF6.3 PE=1 SV=1
	Sa28F.36	Sa40F.114	GO:0016020; membrane; Cellular Component::GO:0016021; integral to membrane; Cellular Component::GO:0022857; transmembrane transporter activity; Molecular Function::GO:0022891; substrate-specific transmembrane transporter activity; Molecular Function::GO:0055085; transmembrane transport; Biological Process	IPR003663; Sugar/inositol transporter::IPR005828; General substrate transporter::IPR020846; Major facilitator superfamily domain	solute carrier family 2, facilitated glucose transporter member 8; K08145 MFS transporter, SP family, solute carrier family 2 (facilitated glucose transporter), member 8 (A)	D-xylose-proton symporter-like 3, chloroplastic OS=Arabidopsis thaliana GN=At5g59250 PE=2 SV=2
	Sa28F.36	Sa40F.115	GO:0016020; membrane; Cellular Component::GO:0016021; integral to membrane; Cellular Component::GO:0022857; transmembrane transporter activity; Molecular Function::GO:0022891; substrate-specific transmembrane transporter activity; Molecular Function::GO:0055085; transmembrane transport; Biological Process	IPR003663; Sugar/inositol transporter::IPR005828; General substrate transporter::IPR020846; Major facilitator superfamily domain	hypothetical protein; K08149 MFS transporter, SP family, solute carrier family 2 (facilitated glucose transporter), member 12 (A)	D-xylose-proton symporter-like 3, chloroplastic OS=Arabidopsis thaliana GN=At5g59250 PE=2 SV=2
	Sa28F.36	Sa41F.157	GO:0008565; protein transporter activity; Molecular Function::GO:0015031; protein transport; Biological Process	IPR003369; Sec-independent protein translocase protein TatA/B/E	sec-independent protein translocase protein TATA, chloroplastic-like; K03116 sec-independent protein translocase protein TatA (A)	Sec-independent protein translocase protein TATA, chloroplastic OS=Pisum sativum GN=TATA PE=1 SV=1
	Sa28F.36	Sa46F.261	GO:0008565; protein transporter activity; Molecular Function::GO:0009306; protein secretion; Biological Process::GO:0015031; protein transport; Biological Process::GO:0016020; membrane; Cellular Component	IPR003369; Sec-independent protein translocase protein TatA/B/E::IPR003998; Twin-arginine translocation protein TatB-like	sec-independent protein translocase protein TATA, chloroplastic; K03116 sec-independent protein translocase protein TatA (A)	Sec-independent protein translocase protein TATA, chloroplastic OS=Zea mays GN=TATA PE=1 SV=1
	Sa28F.36	Sa52F.108	GO:0016021; integral to membrane; Cellular Component::GO:0055085; transmembrane transport; Biological Process	IPR011701; Major facilitator superfamily::IPR020846; Major facilitator superfamily domain	sodium-dependent phosphate transport protein 1, chloroplastic-like; K08193 MFS transporter, ACS family, solute carrier family 17 (sodium-dependent inorganic phosphate cotransporter), other (A)	Sodium-dependent phosphate transport protein 1, chloroplastic OS=Arabidopsis thaliana GN=ANTR1 PE=1 SV=1
	Sa28F.36	Sa56F.106	GO:0006814; sodium ion transport; Biological Process::GO:0008508; bile acid:sodium symporter activity; Molecular Function::GO:0016020; membrane; Cellular Component	IPR002657; Bile acid:sodium symporter	sodium/pyruvate cotransporter BASS2, chloroplastic-like; K03453 bile acid:Na+ symporter, BASS family (A)	Sodium/pyruvate cotransporter BASS2, chloroplastic OS=Arabidopsis thaliana GN=BASS2 PE=2 SV=1
	Sa28F.36	Sa57F.51	GO:0006952; defense response; Biological Process::GO:0009607; response to biotic stimulus; Biological Process	IPR000916; Bet v I domain::IPR024948; Major latex protein domain	NA	MLP-like protein 43 OS=Arabidopsis thaliana GN=MLP43 PE=1 SV=1
	Sa28F.36	Sa74F.23	GO:0000166; nucleotide binding; Molecular Function::GO:0005524; ATP binding; Molecular Function::GO:0006810; transport; Biological Process::GO:0016021; integral to membrane; Cellular Component::GO:0016887; ATPase activity; Molecular Function::GO:0017111; nucleoside-triphosphatase activity; Molecular Function::GO:0042626; ATPase activity, coupled to transmembrane movement of substances; Molecular …	IPR001140; ABC transporter, transmembrane domain::IPR003439; ABC transporter-like::IPR003593; AAA+ ATPase domain::IPR017940; ABC transporter, integral membrane type 1	ABC transporter B family member 28; K05655 ATP-binding cassette, subfamily B (MDR/TAP), member 8 (A)	ABC transporter B family member 28 OS=Arabidopsis thaliana GN=ABCB28 PE=2 SV=1
	Sa28F.36	Sa79F.141	GO:0006629; lipid metabolic process; Biological Process::GO:0016788; hydrolase activity, acting on ester bonds; Molecular Function	IPR001087; Lipase, GDSL	hypothetical protein; K00679 phospholipid:diacylglycerol acyltransferase [EC:2.3.1.158] (A)	GDSL esterase/lipase EXL1 OS=Arabidopsis thaliana GN=EXL1 PE=2 SV=1
	Sa28F.36	Sa80F.40	GO:0003700; sequence-specific DNA binding transcription factor activity; Molecular Function::GO:0006355; regulation of transcription, DNA-dependent; Biological Process::GO:0043565; sequence-specific DNA binding; Molecular Function	IPR001356; Homeobox domain::IPR002913; START domain	homeobox-leucine zipper protein MERISTEM L1; K09338 homeobox-leucine zipper protein (A)	Homeobox-leucine zipper protein MERISTEM L1 OS=Arabidopsis thaliana GN=ATML1 PE=2 SV=1
	Sa28F.36	Sa81F.167	GO:0003677; DNA binding; Molecular Function::GO:0003700; sequence-specific DNA binding transcription factor activity; Molecular Function::GO:0006352; DNA-dependent transcription, initiation; Biological Process::GO:0006355; regulation of transcription, DNA-dependent; Biological Process::GO:0016987; sigma factor activity; Molecular Function	IPR000943; RNA polymerase sigma-70::IPR007624; RNA polymerase sigma-70 region 3::IPR007630; RNA polymerase sigma-70 region 4	RNA polymerase sigma factor sigC-like; K03093 RNA polymerase sigma factor (A)	RNA polymerase sigma factor sigD, chloroplastic OS=Arabidopsis thaliana GN=SIGD PE=2 SV=1
	Sa28F.36	Sa82F.15	GO:0004190; aspartic-type endopeptidase activity; Molecular Function::GO:0006508; proteolysis; Biological Process::GO:0006629; lipid metabolic process; Biological Process	IPR001461; Peptidase A1::IPR007856; Saposin-like type B, 1::IPR008138; Saposin-like type B, 2::IPR008139; Saposin B	aspartic proteinase-like; K08245 phytepsin [EC:3.4.23.40] (A)	Aspartic proteinase A1 OS=Arabidopsis thaliana GN=APA1 PE=1 SV=1
	Sa28F.36	Sa86F.128	GO:0008565; protein transporter activity; Molecular Function::GO:0009306; protein secretion; Biological Process::GO:0015031; protein transport; Biological Process::GO:0016020; membrane; Cellular Component	IPR003369; Sec-independent protein translocase protein TatA/B/E::IPR003998; Twin-arginine translocation protein TatB-like	sec-independent protein translocase protein TATA, chloroplastic; K03116 sec-independent protein translocase protein TatA (A)	Sec-independent protein translocase protein TATA, chloroplastic OS=Zea mays GN=TATA PE=1 SV=1
	Sa28F.36	Sa89F.160	GO:0003677; DNA binding; Molecular Function::GO:0003700; sequence-specific DNA binding transcription factor activity; Molecular Function::GO:0006355; regulation of transcription, DNA-dependent; Biological Process::GO:0043565; sequence-specific DNA binding; Molecular Function	IPR001356; Homeobox domain::IPR006563; POX domain::IPR008422; Homeobox KN domain	homeobox protein BEL1 homolog; K16670 homeobox protein Meis2 (A)	Homeobox protein BEL1 homolog OS=Arabidopsis thaliana GN=BEL1 PE=1 SV=2
	Sa28F.36	Sa145F.42	GO:0000976; transcription regulatory region sequence-specific DNA binding; Molecular Function::GO:0003700; sequence-specific DNA binding transcription factor activity; Molecular Function::GO:0006355; regulation of transcription, DNA-dependent; Biological Process::GO:0043565; sequence-specific DNA binding; Molecular Function	IPR000047; Helix-turn-helix motif::IPR001356; Homeobox domain	homeobox-leucine zipper protein MERISTEM L1; K09338 homeobox-leucine zipper protein (A)	Homeobox-leucine zipper protein PROTODERMAL FACTOR 2 OS=Arabidopsis thaliana GN=PDF2 PE=2 SV=1
	Sa28F.36	Sa155F.68.1	GO:0008565; protein transporter activity; Molecular Function::GO:0009306; protein secretion; Biological Process::GO:0015031; protein transport; Biological Process::GO:0016020; membrane; Cellular Component	IPR003369; Sec-independent protein translocase protein TatA/B/E::IPR003998; Twin-arginine translocation protein TatB-like	hypothetical protein; K03116 sec-independent protein translocase protein TatA (A)	Sec-independent protein translocase protein TATB, chloroplastic OS=Pisum sativum GN=TATB PE=1 SV=1
	Sa28F.36	Sa156F.52	GO:0003333; amino acid transmembrane transport; Biological Process::GO:0015171; amino acid transmembrane transporter activity; Molecular Function::GO:0016020; membrane; Cellular Component	IPR002293; Amino acid/polyamine transporter I	An09g05010; choline transport protein; K19564 choline transport protein (A)	Amino-acid permease BAT1 homolog OS=Oryza sativa subsp. japonica GN=BAT1 PE=2 SV=1
	Sa28F.36	Sa161F.36	GO:0008519; ammonium transmembrane transporter activity; Molecular Function::GO:0015696; ammonium transport; Biological Process::GO:0016020; membrane; Cellular Component::GO:0072488; ammonium transmembrane transport; Biological Process	IPR001905; Ammonium transporter::IPR024041; Ammonium transporter AmtB-like domain	ammonium transporter 1 member 3-like; K03320 ammonium transporter, Amt family (A)	Ammonium transporter 1 member 3 OS=Solanum lycopersicum GN=AMT1-3 PE=2 SV=1
	Sa28F.36	Sa161F.41	GO:0005215; transporter activity; Molecular Function::GO:0006810; transport; Biological Process::GO:0016020; membrane; Cellular Component	IPR000109; Proton-dependent oligopeptide transporter family	oligopeptide transporter, putative; K14638 solute carrier family 15 (peptide/histidine transporter), member 3/4 (A)	Protein NRT1/ PTR FAMILY 5.1 OS=Arabidopsis thaliana GN=NPF5.1 PE=2 SV=2
	Sa28F.36	Sa193F.40	GO:0003700; sequence-specific DNA binding transcription factor activity; Molecular Function::GO:0006355; regulation of transcription, DNA-dependent; Biological Process::GO:0043565; sequence-specific DNA binding; Molecular Function	IPR001356; Homeobox domain::IPR002913; START domain	homeobox-leucine zipper protein HDG2-like; K09338 homeobox-leucine zipper protein (A)	Homeobox-leucine zipper protein HDG2 OS=Arabidopsis thaliana GN=HDG2 PE=2 SV=1
	Sa28F.38	Sa30F.189	GO:0003677; DNA binding; Molecular Function::GO:0003700; sequence-specific DNA binding transcription factor activity; Molecular Function::GO:0006352; DNA-dependent transcription, initiation; Biological Process::GO:0006355; regulation of transcription, DNA-dependent; Biological Process::GO:0016987; sigma factor activity; Molecular Function	IPR000943; RNA polymerase sigma-70::IPR007624; RNA polymerase sigma-70 region 3::IPR007627; RNA polymerase sigma-70 region 2::IPR007630; RNA polymerase sigma-70 region 4	hypothetical protein; K03093 RNA polymerase sigma factor (A)	RNA polymerase sigma factor sigC OS=Arabidopsis thaliana GN=SIGC PE=2 SV=1
	Sa28F.38	Sa40F.114	GO:0016020; membrane; Cellular Component::GO:0016021; integral to membrane; Cellular Component::GO:0022857; transmembrane transporter activity; Molecular Function::GO:0022891; substrate-specific transmembrane transporter activity; Molecular Function::GO:0055085; transmembrane transport; Biological Process	IPR003663; Sugar/inositol transporter::IPR005828; General substrate transporter::IPR020846; Major facilitator superfamily domain	solute carrier family 2, facilitated glucose transporter member 8; K08145 MFS transporter, SP family, solute carrier family 2 (facilitated glucose transporter), member 8 (A)	D-xylose-proton symporter-like 3, chloroplastic OS=Arabidopsis thaliana GN=At5g59250 PE=2 SV=2
	Sa28F.38	Sa40F.115	GO:0016020; membrane; Cellular Component::GO:0016021; integral to membrane; Cellular Component::GO:0022857; transmembrane transporter activity; Molecular Function::GO:0022891; substrate-specific transmembrane transporter activity; Molecular Function::GO:0055085; transmembrane transport; Biological Process	IPR003663; Sugar/inositol transporter::IPR005828; General substrate transporter::IPR020846; Major facilitator superfamily domain	hypothetical protein; K08149 MFS transporter, SP family, solute carrier family 2 (facilitated glucose transporter), member 12 (A)	D-xylose-proton symporter-like 3, chloroplastic OS=Arabidopsis thaliana GN=At5g59250 PE=2 SV=2
	Sa28F.38	Sa41F.157	GO:0008565; protein transporter activity; Molecular Function::GO:0015031; protein transport; Biological Process	IPR003369; Sec-independent protein translocase protein TatA/B/E	sec-independent protein translocase protein TATA, chloroplastic-like; K03116 sec-independent protein translocase protein TatA (A)	Sec-independent protein translocase protein TATA, chloroplastic OS=Pisum sativum GN=TATA PE=1 SV=1
	Sa28F.38	Sa46F.261	GO:0008565; protein transporter activity; Molecular Function::GO:0009306; protein secretion; Biological Process::GO:0015031; protein transport; Biological Process::GO:0016020; membrane; Cellular Component	IPR003369; Sec-independent protein translocase protein TatA/B/E::IPR003998; Twin-arginine translocation protein TatB-like	sec-independent protein translocase protein TATA, chloroplastic; K03116 sec-independent protein translocase protein TatA (A)	Sec-independent protein translocase protein TATA, chloroplastic OS=Zea mays GN=TATA PE=1 SV=1
	Sa28F.38	Sa52F.108	GO:0016021; integral to membrane; Cellular Component::GO:0055085; transmembrane transport; Biological Process	IPR011701; Major facilitator superfamily::IPR020846; Major facilitator superfamily domain	sodium-dependent phosphate transport protein 1, chloroplastic-like; K08193 MFS transporter, ACS family, solute carrier family 17 (sodium-dependent inorganic phosphate cotransporter), other (A)	Sodium-dependent phosphate transport protein 1, chloroplastic OS=Arabidopsis thaliana GN=ANTR1 PE=1 SV=1
	Sa28F.38	Sa56F.106	GO:0006814; sodium ion transport; Biological Process::GO:0008508; bile acid:sodium symporter activity; Molecular Function::GO:0016020; membrane; Cellular Component	IPR002657; Bile acid:sodium symporter	sodium/pyruvate cotransporter BASS2, chloroplastic-like; K03453 bile acid:Na+ symporter, BASS family (A)	Sodium/pyruvate cotransporter BASS2, chloroplastic OS=Arabidopsis thaliana GN=BASS2 PE=2 SV=1
	Sa28F.38	Sa79F.141	GO:0006629; lipid metabolic process; Biological Process::GO:0016788; hydrolase activity, acting on ester bonds; Molecular Function	IPR001087; Lipase, GDSL	hypothetical protein; K00679 phospholipid:diacylglycerol acyltransferase [EC:2.3.1.158] (A)	GDSL esterase/lipase EXL1 OS=Arabidopsis thaliana GN=EXL1 PE=2 SV=1
	Sa28F.38	Sa81F.167	GO:0003677; DNA binding; Molecular Function::GO:0003700; sequence-specific DNA binding transcription factor activity; Molecular Function::GO:0006352; DNA-dependent transcription, initiation; Biological Process::GO:0006355; regulation of transcription, DNA-dependent; Biological Process::GO:0016987; sigma factor activity; Molecular Function	IPR000943; RNA polymerase sigma-70::IPR007624; RNA polymerase sigma-70 region 3::IPR007630; RNA polymerase sigma-70 region 4	RNA polymerase sigma factor sigC-like; K03093 RNA polymerase sigma factor (A)	RNA polymerase sigma factor sigD, chloroplastic OS=Arabidopsis thaliana GN=SIGD PE=2 SV=1
	Sa28F.38	Sa89F.38	GO:0055085; transmembrane transport; Biological Process	IPR004813; Oligopeptide transporter, OPT superfamily	NA	Oligopeptide transporter 7 OS=Arabidopsis thaliana GN=OPT7 PE=2 SV=1
	Sa28F.38	Sa89F.39	GO:0055085; transmembrane transport; Biological Process	IPR004813; Oligopeptide transporter, OPT superfamily	NA	Oligopeptide transporter 7 OS=Arabidopsis thaliana GN=OPT7 PE=2 SV=1
	Sa28F.38	Sa145F.42	GO:0000976; transcription regulatory region sequence-specific DNA binding; Molecular Function::GO:0003700; sequence-specific DNA binding transcription factor activity; Molecular Function::GO:0006355; regulation of transcription, DNA-dependent; Biological Process::GO:0043565; sequence-specific DNA binding; Molecular Function	IPR000047; Helix-turn-helix motif::IPR001356; Homeobox domain	homeobox-leucine zipper protein MERISTEM L1; K09338 homeobox-leucine zipper protein (A)	Homeobox-leucine zipper protein PROTODERMAL FACTOR 2 OS=Arabidopsis thaliana GN=PDF2 PE=2 SV=1
	Sa28F.38	Sa156F.52	GO:0003333; amino acid transmembrane transport; Biological Process::GO:0015171; amino acid transmembrane transporter activity; Molecular Function::GO:0016020; membrane; Cellular Component	IPR002293; Amino acid/polyamine transporter I	An09g05010; choline transport protein; K19564 choline transport protein (A)	Amino-acid permease BAT1 homolog OS=Oryza sativa subsp. japonica GN=BAT1 PE=2 SV=1
	Sa29F.188.1	Sa33F.239	GO:0003677; DNA binding; Molecular Function::GO:0003700; sequence-specific DNA binding transcription factor activity; Molecular Function::GO:0005634; nucleus; Cellular Component::GO:0006355; regulation of transcription, DNA-dependent; Biological Process::GO:0046983; protein dimerization activity; Molecular Function	IPR002100; Transcription factor, MADS-box::IPR002487; Transcription factor, K-box::IPR020158; Protein of unknown function DUF2756	MADS-box transcription factor 23-like; K09264 MADS-box transcription factor, plant (A)	Agamous-like MADS-box protein AGL21 OS=Arabidopsis thaliana GN=AGL21 PE=1 SV=1
	Sa29F.188.1	Sa34F.33	GO:0016021; integral to membrane; Cellular Component::GO:0016192; vesicle-mediated transport; Biological Process	IPR001388; Synaptobrevin::IPR010908; Longin domain	VAMP-like protein YKT61; K08516 synaptobrevin homolog YKT6 (A)	VAMP-like protein YKT61 OS=Arabidopsis thaliana GN=YKT61 PE=2 SV=1
	Sa29F.188.1	Sa35F.13	GO:0003924; GTPase activity; Molecular Function::GO:0005525; GTP binding; Molecular Function::GO:0005622; intracellular; Cellular Component::GO:0006184; GTP catabolic process; Biological Process::GO:0006886; intracellular protein transport; Biological Process::GO:0006913; nucleocytoplasmic transport; Biological Process::GO:0007165; signal transduction; Biological Process::GO:0007264; small GTPase…	IPR001806; Small GTPase superfamily::IPR002041; Ran GTPase::IPR003578; Small GTPase superfamily, Rho type::IPR003579; Small GTPase superfamily, Rab type::IPR020849; Small GTPase superfamily, Ras type	POPTRDRAFT_800974; Ras-related GTP-binding family protein; K07893 Ras-related protein Rab-6A (A)	Ras-related protein RABH1e OS=Arabidopsis thaliana GN=RABH1E PE=2 SV=1
	Sa29F.188.1	Sa37F.129	GO:0005737; cytoplasm; Cellular Component::GO:0017089; glycolipid transporter activity; Molecular Function::GO:0046836; glycolipid transport; Biological Process::GO:0051861; glycolipid binding; Molecular Function	IPR014830; Glycolipid transfer protein domain	pleckstrin homology domain-containing family A member 8; K08051 pleckstrin homology domain containing, family A (phosphoinositide binding specific) member 8 (A)	Glycolipid transfer protein 2 OS=Arabidopsis thaliana GN=GLTP2 PE=2 SV=1
	Sa29F.188.1	Sa37F.129	GO:0005737; cytoplasm; Cellular Component::GO:0017089; glycolipid transporter activity; Molecular Function::GO:0046836; glycolipid transport; Biological Process::GO:0051861; glycolipid binding; Molecular Function	IPR014830; Glycolipid transfer protein domain	pleckstrin homology domain-containing family A member 8; K08051 pleckstrin homology domain containing, family A (phosphoinositide binding specific) member 8 (A)	Glycolipid transfer protein 2 OS=Arabidopsis thaliana GN=GLTP2 PE=2 SV=1
	Sa29F.188.1	Sa37F.254	GO:0003700; sequence-specific DNA binding transcription factor activity; Molecular Function::GO:0006355; regulation of transcription, DNA-dependent; Biological Process::GO:0043565; sequence-specific DNA binding; Molecular Function	IPR003657; DNA-binding WRKY	cyclin-dependent kinase 12; K08819 cyclin-dependent kinase 12/13 [EC:2.7.11.22 2.7.11.23] (A)	Probable WRKY transcription factor 4 OS=Arabidopsis thaliana GN=WRKY4 PE=1 SV=2
	Sa29F.188.1	Sa38F.75	GO:0003677; DNA binding; Molecular Function::GO:0003700; sequence-specific DNA binding transcription factor activity; Molecular Function::GO:0005634; nucleus; Cellular Component::GO:0006355; regulation of transcription, DNA-dependent; Biological Process::GO:0046983; protein dimerization activity; Molecular Function	IPR002100; Transcription factor, MADS-box::IPR002487; Transcription factor, K-box	agamous-like MADS-box protein AGL1; K09264 MADS-box transcription factor, plant (A)	MADS-box protein SVP OS=Arabidopsis thaliana GN=SVP PE=1 SV=1
	Sa29F.188.1	Sa40F.30	GO:0005750; mitochondrial respiratory chain complex III; Cellular Component::GO:0006122; mitochondrial electron transport, ubiquinol to cytochrome c; Biological Process	IPR003197; Cytochrome b-c1 complex subunit 7	cytochrome b-c1 complex subunit 7-2; K00417 ubiquinol-cytochrome c reductase subunit 7 (A)	Cytochrome b-c1 complex subunit 7-2 OS=Arabidopsis thaliana GN=QCR7-2 PE=1 SV=1
	Sa29F.188.1	Sa42F.92	GO:0030001; metal ion transport; Biological Process::GO:0046872; metal ion binding; Molecular Function	IPR006121; Heavy metal-associated domain, HMA	copper transport protein CCH-like; K07213 copper chaperone (A)	Copper transport protein ATX1 OS=Arabidopsis thaliana GN=ATX1 PE=1 SV=1
	Sa29F.188.1	Sa44F.163	GO:0003700; sequence-specific DNA binding transcription factor activity; Molecular Function::GO:0006351; transcription, DNA-dependent; Biological Process::GO:0006355; regulation of transcription, DNA-dependent; Biological Process::GO:0043565; sequence-specific DNA binding; Molecular Function	IPR004827; Basic-leucine zipper domain::IPR025422; Transcription factor TGA like domain	transcription factor HBP-1b(c38)-like; K14431 transcription factor TGA (A)	TGACG-sequence-specific DNA-binding protein TGA-2.1 OS=Nicotiana tabacum GN=TGA21 PE=1 SV=1
	Sa29F.188.1	Sa45F.71.2	GO:0015031; protein transport; Biological Process::GO:0016021; integral to membrane; Cellular Component	IPR007273; SCAMP	secretory carrier-associated membrane protein 3-like; K19995 secretory carrier-associated membrane protein (A)	Secretory carrier-associated membrane protein 3 OS=Arabidopsis thaliana GN=SCAMP3 PE=1 SV=1
	Sa29F.188.1	Sa49F.106	GO:0016301; kinase activity; Molecular Function::GO:0046474; glycerophospholipid biosynthetic process; Biological Process	IPR026712; Choline/Ethanolamine kinase	probable choline kinase 1; K14156 choline/ethanolamine kinase [EC:2.7.1.32 2.7.1.82] (A)	Probable choline kinase 2 OS=Arabidopsis thaliana GN=At1g74320 PE=2 SV=1
	Sa29F.188.1	Sa49F.56	GO:0003700; sequence-specific DNA binding transcription factor activity; Molecular Function::GO:0006355; regulation of transcription, DNA-dependent; Biological Process	IPR001471; AP2/ERF domain	ethylene-responsive transcription factor RAP2-4; K09286 EREBP-like factor (A)	Ethylene-responsive transcription factor RAP2-4 OS=Arabidopsis thaliana GN=RAP2-4 PE=1 SV=1
	Sa29F.188.1	Sa52F.65	GO:0003700; sequence-specific DNA binding transcription factor activity; Molecular Function::GO:0006355; regulation of transcription, DNA-dependent; Biological Process	IPR001471; AP2/ERF domain	ethylene-responsive transcription factor RAP2-7-like; K09284 AP2-like factor, euAP2 lineage (A)	Floral homeotic protein APETALA 2 OS=Arabidopsis thaliana GN=AP2 PE=1 SV=1
	Sa29F.188.1	Sa54F.56	GO:0016021; integral to membrane; Cellular Component::GO:0055085; transmembrane transport; Biological Process	IPR004776; Auxin efflux carrier	POPTRDRAFT_760338; auxin efflux carrier family protein; K07088 uncharacterized protein (A)	Uncharacterized transporter C5D6.04 OS=Schizosaccharomyces pombe (strain 972 / ATCC 24843) GN=SPAC5D6.04 PE=3 SV=1
	Sa29F.188.1	Sa55F.243	GO:0016021; integral to membrane; Cellular Component::GO:0055085; transmembrane transport; Biological Process	IPR004776; Auxin efflux carrier	probable auxin efflux carrier component 1b; K13947 auxin efflux carrier family (A)	Probable auxin efflux carrier component 1c OS=Oryza sativa subsp. japonica GN=PIN1C PE=2 SV=1
	Sa29F.188.1	Sa56F.37	GO:0016020; membrane; Cellular Component::GO:0048193; Golgi vesicle transport; Biological Process	IPR015260; Syntaxin 6, N-terminal	syntaxin-61; K08498 syntaxin 6 (A)	NA
	Sa29F.188.1	Sa60F.130	GO:0005509; calcium ion binding; Molecular Function::GO:0055085; transmembrane transport; Biological Process	IPR002048; EF-hand domain::IPR002067; Mitochondrial carrier protein::IPR011992; EF-hand domain pair::IPR018108; Mitochondrial substrate/solute carrier	calcium-binding mitochondrial carrier protein SCaMC-1-like; K14684 solute carrier family 25 (mitochondrial phosphate transporter), member 23/24/25/41 (A)	Calcium-binding mitochondrial carrier protein SCaMC-3 OS=Homo sapiens GN=SLC25A23 PE=1 SV=2
	Sa29F.188.1	Sa60F.42	GO:0006914; autophagy; Biological Process::GO:0015031; protein transport; Biological Process::GO:0032258; CVT pathway; Biological Process	IPR004241; Autophagy-related protein Atg8 family::IPR027732; Autophagy-related protein 8, Streptophyta	autophagy-related protein 8f; K08341 GABA(A) receptor-associated protein (A)	Autophagy-related protein 8e OS=Arabidopsis thaliana GN=ATG8E PE=2 SV=2
	Sa29F.188.1	Sa70F.89	GO:0003924; GTPase activity; Molecular Function::GO:0005525; GTP binding; Molecular Function::GO:0005622; intracellular; Cellular Component::GO:0006184; GTP catabolic process; Biological Process::GO:0006886; intracellular protein transport; Biological Process::GO:0006913; nucleocytoplasmic transport; Biological Process::GO:0007165; signal transduction; Biological Process::GO:0007264; small GTPase…	IPR001806; Small GTPase superfamily::IPR002041; Ran GTPase::IPR003578; Small GTPase superfamily, Rho type::IPR003579; Small GTPase superfamily, Rab type::IPR020849; Small GTPase superfamily, Ras type	ras-related protein RABA1f; K07904 Ras-related protein Rab-11A (A)	Ras-related protein RABA1f OS=Arabidopsis thaliana GN=RABA1F PE=2 SV=1
	Sa29F.188.1	Sa72F.104	GO:0005525; GTP binding; Molecular Function::GO:0005622; intracellular; Cellular Component::GO:0006886; intracellular protein transport; Biological Process::GO:0007264; small GTPase mediated signal transduction; Biological Process::GO:0015031; protein transport; Biological Process	IPR003579; Small GTPase superfamily, Rab type::IPR006687; Small GTPase superfamily, SAR1-type::IPR006689; Small GTPase superfamily, ARF/SAR type::IPR024156; Small GTPase superfamily, ARF type	ADP-ribosylation factor-like protein 5; K07950 ADP-ribosylation factor-like protein 5B (A)	ADP-ribosylation factor-like protein 5 OS=Dictyostelium discoideum GN=arl5 PE=3 SV=1
	Sa29F.188.1	Sa76F.29	GO:0006855; drug transmembrane transport; Biological Process::GO:0015238; drug transmembrane transporter activity; Molecular Function::GO:0015297; antiporter activity; Molecular Function::GO:0016020; membrane; Cellular Component::GO:0055085; transmembrane transport; Biological Process	IPR002528; Multi antimicrobial extrusion protein	MATE efflux family protein 8-like; K03327 multidrug resistance protein, MATE family (A)	MATE efflux family protein 9 OS=Arabidopsis thaliana GN=DTXL5 PE=2 SV=1
	Sa29F.188.1	Sa78F.170	GO:0006839; mitochondrial transport; Biological Process::GO:0031966; mitochondrial membrane; Cellular Component	IPR002030; Mitochondrial brown fat uncoupling protein::IPR018108; Mitochondrial substrate/solute carrier	mitochondrial uncoupling protein 1-like; K15103 solute carrier family 25 (mitochondrial uncoupling protein), member 8/9 (A)	Mitochondrial uncoupling protein 1 OS=Arabidopsis thaliana GN=PUMP1 PE=1 SV=1
	Sa29F.188.1	Sa79F.158	GO:0003677; DNA binding; Molecular Function::GO:0003700; sequence-specific DNA binding transcription factor activity; Molecular Function::GO:0006355; regulation of transcription, DNA-dependent; Biological Process::GO:0043565; sequence-specific DNA binding; Molecular Function	IPR001356; Homeobox domain::IPR006563; POX domain::IPR008422; Homeobox KN domain	homeobox protein BEL1 homolog; K16670 homeobox protein Meis2 (A)	BEL1-like homeodomain protein 7 OS=Arabidopsis thaliana GN=BLH7 PE=2 SV=1
	Sa29F.188.1	Sa83F.84	GO:0016021; integral to membrane; Cellular Component::GO:0022857; transmembrane transporter activity; Molecular Function::GO:0055085; transmembrane transport; Biological Process	IPR005828; General substrate transporter::IPR020846; Major facilitator superfamily domain	probable inositol transporter 2; K08150 MFS transporter, SP family, solute carrier family 2 (myo-inositol transporter), member 13 (A)	Monosaccharide-sensing protein 2 OS=Arabidopsis thaliana GN=MSSP2 PE=1 SV=2
	Sa29F.188.1	Sa83F.85	GO:0016020; membrane; Cellular Component::GO:0016021; integral to membrane; Cellular Component::GO:0022857; transmembrane transporter activity; Molecular Function::GO:0022891; substrate-specific transmembrane transporter activity; Molecular Function::GO:0055085; transmembrane transport; Biological Process	IPR003663; Sugar/inositol transporter::IPR005828; General substrate transporter	sugar porter (SP) family MFS transporter; K08150 MFS transporter, SP family, solute carrier family 2 (myo-inositol transporter), member 13 (A)	Monosaccharide-sensing protein 2 OS=Arabidopsis thaliana GN=MSSP2 PE=1 SV=2
	Sa29F.188.1	Sa85F.63	GO:0003700; sequence-specific DNA binding transcription factor activity; Molecular Function::GO:0006355; regulation of transcription, DNA-dependent; Biological Process::GO:0043565; sequence-specific DNA binding; Molecular Function	IPR004827; Basic-leucine zipper domain	transcription factor HBP-1a; K09060 plant G-box-binding factor (A)	Ocs element-binding factor 1 OS=Zea mays GN=OBF1 PE=2 SV=2
	Sa29F.188.1	Sa88F.80	GO:0015031; protein transport; Biological Process::GO:0016021; integral to membrane; Cellular Component	IPR007273; SCAMP	hypothetical protein; K19995 secretory carrier-associated membrane protein (A)	Secretory carrier-associated membrane protein 3 OS=Arabidopsis thaliana GN=SCAMP3 PE=1 SV=1
	Sa29F.188.1	Sa92F.66	GO:0003700; sequence-specific DNA binding transcription factor activity; Molecular Function::GO:0006355; regulation of transcription, DNA-dependent; Biological Process::GO:0043565; sequence-specific DNA binding; Molecular Function	IPR003657; DNA-binding WRKY	probable WRKY transcription factor 26; K13424 WRKY transcription factor 33 (A)	Probable WRKY transcription factor 61 OS=Arabidopsis thaliana GN=WRKY61 PE=2 SV=1
	Sa29F.188.1	Sa95F.52	GO:0005783; endoplasmic reticulum; Cellular Component::GO:0006886; intracellular protein transport; Biological Process::GO:0016021; integral to membrane; Cellular Component	IPR008417; B-cell receptor-associated 31-like	hypothetical protein; K14009 B-cell receptor-associated protein 31 (A)	B-cell receptor-associated protein 31 OS=Homo sapiens GN=BCAP31 PE=1 SV=3
	Sa29F.188.1	Sa99F.123	GO:0003700; sequence-specific DNA binding transcription factor activity; Molecular Function::GO:0006355; regulation of transcription, DNA-dependent; Biological Process::GO:0043565; sequence-specific DNA binding; Molecular Function	IPR003657; DNA-binding WRKY	WRKY transcription factor 22; K13425 WRKY transcription factor 22 (A)	WRKY transcription factor 22 OS=Arabidopsis thaliana GN=WRKY22 PE=2 SV=1
	Sa29F.188.1	Sa99F.163	GO:0006952; defense response; Biological Process::GO:0016021; integral to membrane; Cellular Component	IPR004326; Mlo-related protein	MLO-like protein 6; K08472 mlo protein (A)	MLO-like protein 6 OS=Arabidopsis thaliana GN=MLO6 PE=2 SV=2
	Sa29F.188.1	Sa102F.24	GO:0006629; lipid metabolic process; Biological Process	IPR002641; Patatin/Phospholipase A2-related	patatin-like phospholipase domain-containing protein 2; K16816 patatin-like phospholipase domain-containing protein 2 [EC:3.1.1.3] (A)	Patatin-like phospholipase domain-containing protein 4 OS=Homo sapiens GN=PNPLA4 PE=2 SV=3
	Sa29F.188.1	Sa110F.59	GO:0016020; membrane; Cellular Component::GO:0016021; integral to membrane; Cellular Component::GO:0022857; transmembrane transporter activity; Molecular Function::GO:0022891; substrate-specific transmembrane transporter activity; Molecular Function::GO:0055085; transmembrane transport; Biological Process	IPR003663; Sugar/inositol transporter::IPR005828; General substrate transporter::IPR020846; Major facilitator superfamily domain	inositol transporter 1; K08150 MFS transporter, SP family, solute carrier family 2 (myo-inositol transporter), member 13 (A)	D-xylose-proton symporter-like 2 OS=Arabidopsis thaliana GN=At5g17010 PE=1 SV=1
	Sa29F.188.1	Sa112F.112	GO:0003700; sequence-specific DNA binding transcription factor activity; Molecular Function::GO:0006351; transcription, DNA-dependent; Biological Process::GO:0006355; regulation of transcription, DNA-dependent; Biological Process::GO:0043565; sequence-specific DNA binding; Molecular Function	IPR004827; Basic-leucine zipper domain::IPR025422; Transcription factor TGA like domain	BZIP transcription factor family protein isoform 1; K14431 transcription factor TGA (A)	Transcription factor TGA4 OS=Arabidopsis thaliana GN=TGA4 PE=1 SV=2
	Sa29F.188.1	Sa143F.62	GO:0015078; hydrogen ion transmembrane transporter activity; Molecular Function::GO:0015991; ATP hydrolysis coupled proton transport; Biological Process::GO:0033179; proton-transporting V-type ATPase, V0 domain; Cellular Component	IPR002490; ATPase, V0 complex, subunit 116kDa	hypothetical protein; K02154 V-type H+-transporting ATPase subunit a (A)	V-type proton ATPase subunit a3 OS=Arabidopsis thaliana GN=VHA-a3 PE=1 SV=1
	Sa29F.188.1	Sa148F.36	GO:0006812; cation transport; Biological Process::GO:0008324; cation transmembrane transporter activity; Molecular Function::GO:0016021; integral to membrane; Cellular Component::GO:0055085; transmembrane transport; Biological Process	IPR002524; Cation efflux protein	Metal tolerance protein B1, putative isoform 1; K14689 solute carrier family 30 (zinc transporter), member 2 (A)	Metal tolerance protein B OS=Arabidopsis thaliana GN=MTPB PE=2 SV=1
	Sa29F.188.1	Sa148F.6	GO:0008610; lipid biosynthetic process; Biological Process	IPR003333; Mycolic acid cyclopropane synthase	(S)-coclaurine N-methyltransferase; K13384 (S)-coclaurine N-methyltransferase [EC:2.1.1.140] (A)	(S)-coclaurine N-methyltransferase OS=Thalictrum flavum subsp. glaucum PE=1 SV=1
	Sa29F.188.1	Sa161F.43	GO:0005215; transporter activity; Molecular Function::GO:0006810; transport; Biological Process::GO:0016020; membrane; Cellular Component::GO:0055085; transmembrane transport; Biological Process	IPR006043; Xanthine/uracil/vitamin C permease	adenine/guanine permease AZG1-like; K06901 putative MFS transporter, AGZA family, xanthine/uracil permease (A)	Adenine/guanine permease AZG1 OS=Arabidopsis thaliana GN=AZG1 PE=2 SV=1
	Sa29F.188.1	Sa164F.45	GO:0000139; Golgi membrane; Cellular Component::GO:0005801; cis-Golgi network; Cellular Component::GO:0006888; ER to Golgi vesicle-mediated transport; Biological Process::GO:0016021; integral to membrane; Cellular Component	IPR023601; Golgi SNAP receptor complex, subunit 1	Golgi SNAP receptor complex member 1-1; K08495 golgi SNAP receptor complex member 1 (A)	Golgi SNAP receptor complex member 1-1 OS=Arabidopsis thaliana GN=GOS11 PE=2 SV=1
	Sa29F.188.1	Sa175F.32	GO:0005525; GTP binding; Molecular Function::GO:0005622; intracellular; Cellular Component::GO:0006886; intracellular protein transport; Biological Process::GO:0007264; small GTPase mediated signal transduction; Biological Process::GO:0015031; protein transport; Biological Process	IPR003579; Small GTPase superfamily, Rab type::IPR006687; Small GTPase superfamily, SAR1-type::IPR006689; Small GTPase superfamily, ARF/SAR type::IPR024156; Small GTPase superfamily, ARF type	ADP-ribosylation factor-like protein 5; K07950 ADP-ribosylation factor-like protein 5B (A)	ADP-ribosylation factor-like protein 5 OS=Dictyostelium discoideum GN=arl5 PE=3 SV=1
	Sa79F.141	Sa79F.154	GO:0004096; catalase activity; Molecular Function::GO:0006979; response to oxidative stress; Biological Process::GO:0020037; heme binding; Molecular Function::GO:0055114; oxidation-reduction process; Biological Process	IPR010582; Catalase immune-responsive domain::IPR011614; Catalase core domain::IPR018028; Catalase, mono-functional, haem-containing	catalase isozyme 1; K03781 catalase [EC:1.11.1.6] (A)	Catalase isozyme 1 OS=Gossypium hirsutum GN=CAT1 PE=2 SV=2
	Sa79F.141	Sa79F.74	GO:0005315; inorganic phosphate transmembrane transporter activity; Molecular Function::GO:0006817; phosphate ion transport; Biological Process::GO:0016020; membrane; Cellular Component	IPR001204; Phosphate transporter	inorganic phosphate transporter 2-1, chloroplastic; K14640 solute carrier family 20 (sodium-dependent phosphate transporter) (A)	Inorganic phosphate transporter 2-1, chloroplastic OS=Arabidopsis thaliana GN=PHT2-1 PE=1 SV=1
	Sa79F.141	Sa79F.75	GO:0005315; inorganic phosphate transmembrane transporter activity; Molecular Function::GO:0006817; phosphate ion transport; Biological Process::GO:0016020; membrane; Cellular Component	IPR001204; Phosphate transporter	inorganic phosphate transporter 2-1, chloroplastic-like; K14640 solute carrier family 20 (sodium-dependent phosphate transporter) (A)	Inorganic phosphate transporter 2-1, chloroplastic OS=Arabidopsis thaliana GN=PHT2-1 PE=1 SV=1
	Sa79F.141	Sa80F.105	GO:0006605; protein targeting; Biological Process::GO:0006886; intracellular protein transport; Biological Process::GO:0016020; membrane; Cellular Component	IPR001901; Protein translocase complex, SecE/Sec61-gamma subunit	NA	Preprotein translocase subunit SECE1 OS=Arabidopsis thaliana GN=SECE1 PE=1 SV=1
	Sa79F.141	Sa80F.40	GO:0003700; sequence-specific DNA binding transcription factor activity; Molecular Function::GO:0006355; regulation of transcription, DNA-dependent; Biological Process::GO:0043565; sequence-specific DNA binding; Molecular Function	IPR001356; Homeobox domain::IPR002913; START domain	homeobox-leucine zipper protein MERISTEM L1; K09338 homeobox-leucine zipper protein (A)	Homeobox-leucine zipper protein MERISTEM L1 OS=Arabidopsis thaliana GN=ATML1 PE=2 SV=1
	Sa79F.141	Sa81F.167	GO:0003677; DNA binding; Molecular Function::GO:0003700; sequence-specific DNA binding transcription factor activity; Molecular Function::GO:0006352; DNA-dependent transcription, initiation; Biological Process::GO:0006355; regulation of transcription, DNA-dependent; Biological Process::GO:0016987; sigma factor activity; Molecular Function	IPR000943; RNA polymerase sigma-70::IPR007624; RNA polymerase sigma-70 region 3::IPR007630; RNA polymerase sigma-70 region 4	RNA polymerase sigma factor sigC-like; K03093 RNA polymerase sigma factor (A)	RNA polymerase sigma factor sigD, chloroplastic OS=Arabidopsis thaliana GN=SIGD PE=2 SV=1
	Sa79F.141	Sa81F.63	GO:0004348; glucosylceramidase activity; Molecular Function::GO:0006665; sphingolipid metabolic process; Biological Process::GO:0016021; integral to membrane; Cellular Component	IPR006775; Glucosylceramidase::IPR024462; Beta-glucosidase, GBA2 type, N-terminal	Non-lysosomal glucosylceramidase; K17108 non-lysosomal glucosylceramidase [EC:3.2.1.45] (A)	Non-lysosomal glucosylceramidase OS=Mus musculus GN=Gba2 PE=1 SV=2
	Sa79F.141	Sa82F.15	GO:0004190; aspartic-type endopeptidase activity; Molecular Function::GO:0006508; proteolysis; Biological Process::GO:0006629; lipid metabolic process; Biological Process	IPR001461; Peptidase A1::IPR007856; Saposin-like type B, 1::IPR008138; Saposin-like type B, 2::IPR008139; Saposin B	aspartic proteinase-like; K08245 phytepsin [EC:3.4.23.40] (A)	Aspartic proteinase A1 OS=Arabidopsis thaliana GN=APA1 PE=1 SV=1
	Sa79F.141	Sa86F.128	GO:0008565; protein transporter activity; Molecular Function::GO:0009306; protein secretion; Biological Process::GO:0015031; protein transport; Biological Process::GO:0016020; membrane; Cellular Component	IPR003369; Sec-independent protein translocase protein TatA/B/E::IPR003998; Twin-arginine translocation protein TatB-like	sec-independent protein translocase protein TATA, chloroplastic; K03116 sec-independent protein translocase protein TatA (A)	Sec-independent protein translocase protein TATA, chloroplastic OS=Zea mays GN=TATA PE=1 SV=1
	Sa79F.141	Sa89F.160	GO:0003677; DNA binding; Molecular Function::GO:0003700; sequence-specific DNA binding transcription factor activity; Molecular Function::GO:0006355; regulation of transcription, DNA-dependent; Biological Process::GO:0043565; sequence-specific DNA binding; Molecular Function	IPR001356; Homeobox domain::IPR006563; POX domain::IPR008422; Homeobox KN domain	homeobox protein BEL1 homolog; K16670 homeobox protein Meis2 (A)	Homeobox protein BEL1 homolog OS=Arabidopsis thaliana GN=BEL1 PE=1 SV=2
	Sa79F.141	Sa92F.29	GO:0006457; protein folding; Biological Process::GO:0015031; protein transport; Biological Process	IPR008881; Trigger factor, ribosome-binding, bacterial	NA	Trigger factor OS=Thermosynechococcus elongatus (strain BP-1) GN=tig PE=3 SV=1
	Sa79F.141	Sa98F.100	GO:0005525; GTP binding; Molecular Function::GO:0005622; intracellular; Cellular Component::GO:0006886; intracellular protein transport; Biological Process::GO:0007264; small GTPase mediated signal transduction; Biological Process	IPR006687; Small GTPase superfamily, SAR1-type::IPR006689; Small GTPase superfamily, ARF/SAR type::IPR024156; Small GTPase superfamily, ARF type	GTP-binding protein SAR1A; K07953 GTP-binding protein SAR1 [EC:3.6.5.-] (A)	GTP-binding protein SAR1A OS=Arabidopsis thaliana GN=SAR1A PE=2 SV=1
	Sa79F.141	Sa105F.31	GO:0006629; lipid metabolic process; Biological Process::GO:0016788; hydrolase activity, acting on ester bonds; Molecular Function	IPR001087; Lipase, GDSL	hypothetical protein; K00679 phospholipid:diacylglycerol acyltransferase [EC:2.3.1.158] (A)	GDSL esterase/lipase 4 OS=Arabidopsis thaliana GN=GLIP4 PE=2 SV=2
	Sa79F.141	Sa119F.39	GO:0005524; ATP binding; Molecular Function::GO:0006810; transport; Biological Process::GO:0016021; integral to membrane; Cellular Component::GO:0016887; ATPase activity; Molecular Function::GO:0042626; ATPase activity, coupled to transmembrane movement of substances; Molecular Function::GO:0055085; transmembrane transport; Biological Process	IPR001140; ABC transporter, transmembrane domain::IPR003439; ABC transporter-like::IPR017940; ABC transporter, integral membrane type 1	ABC transporter B family member 2-like; K05658 ATP-binding cassette, subfamily B (MDR/TAP), member 1 [EC:3.6.3.44] (A)	ABC transporter B family member 2 OS=Arabidopsis thaliana GN=ABCB2 PE=1 SV=3
	Sa79F.141	Sa119F.40	GO:0000166; nucleotide binding; Molecular Function::GO:0005524; ATP binding; Molecular Function::GO:0006810; transport; Biological Process::GO:0016021; integral to membrane; Cellular Component::GO:0016887; ATPase activity; Molecular Function::GO:0017111; nucleoside-triphosphatase activity; Molecular Function::GO:0042626; ATPase activity, coupled to transmembrane movement of substances; Molecular …	IPR001140; ABC transporter, transmembrane domain::IPR003439; ABC transporter-like::IPR003593; AAA+ ATPase domain::IPR017940; ABC transporter, integral membrane type 1	POPTRDRAFT_757195; P-glycoprotein; K05658 ATP-binding cassette, subfamily B (MDR/TAP), member 1 [EC:3.6.3.44] (A)	ABC transporter B family member 10 OS=Arabidopsis thaliana GN=ABCB10 PE=1 SV=2
	Sa79F.141	Sa122F.62	GO:0015031; protein transport; Biological Process::GO:0016020; membrane; Cellular Component	IPR002208; SecY/SEC61-alpha family	protein translocase secy subunit, putative; K10956 protein transport protein SEC61 subunit alpha (A)	Preprotein translocase subunit SCY1, chloroplastic OS=Arabidopsis thaliana GN=SCY1 PE=1 SV=2
	Sa79F.141	Sa126F.92	GO:0000139; Golgi membrane; Cellular Component::GO:0005801; cis-Golgi network; Cellular Component::GO:0006888; ER to Golgi vesicle-mediated transport; Biological Process::GO:0016021; integral to membrane; Cellular Component	IPR023601; Golgi SNAP receptor complex, subunit 1	Golgi SNAP receptor complex member 1-1; K08495 golgi SNAP receptor complex member 1 (A)	Golgi SNAP receptor complex member 1-1 OS=Arabidopsis thaliana GN=GOS11 PE=2 SV=1
	Sa79F.141	Sa127F.63	GO:0030001; metal ion transport; Biological Process::GO:0046872; metal ion binding; Molecular Function	IPR006121; Heavy metal-associated domain, HMA	trimethylguanosine synthase; K14292 trimethylguanosine synthase [EC:2.1.1.-] (A)	Copper transport protein ATX1 OS=Arabidopsis thaliana GN=ATX1 PE=1 SV=1
	Sa79F.141	Sa135F.11	GO:0003677; DNA binding; Molecular Function::GO:0003700; sequence-specific DNA binding transcription factor activity; Molecular Function::GO:0006352; DNA-dependent transcription, initiation; Biological Process::GO:0006355; regulation of transcription, DNA-dependent; Biological Process::GO:0016987; sigma factor activity; Molecular Function	IPR000943; RNA polymerase sigma-70::IPR007624; RNA polymerase sigma-70 region 3::IPR007627; RNA polymerase sigma-70 region 2::IPR007630; RNA polymerase sigma-70 region 4	hypothetical protein; K03086 RNA polymerase primary sigma factor (A)	RNA polymerase sigma factor sigF, chloroplastic OS=Arabidopsis thaliana GN=SIGF PE=1 SV=1
	Sa79F.141	Sa140F.41.1	GO:0055085; transmembrane transport; Biological Process	IPR002067; Mitochondrial carrier protein::IPR018108; Mitochondrial substrate/solute carrier	hypothetical protein; K14684 solute carrier family 25 (mitochondrial phosphate transporter), member 23/24/25/41 (A)	Mitochondrial substrate carrier family protein B OS=Dictyostelium discoideum GN=mcfB PE=3 SV=1
	Sa79F.141	Sa145F.42	GO:0000976; transcription regulatory region sequence-specific DNA binding; Molecular Function::GO:0003700; sequence-specific DNA binding transcription factor activity; Molecular Function::GO:0006355; regulation of transcription, DNA-dependent; Biological Process::GO:0043565; sequence-specific DNA binding; Molecular Function	IPR000047; Helix-turn-helix motif::IPR001356; Homeobox domain	homeobox-leucine zipper protein MERISTEM L1; K09338 homeobox-leucine zipper protein (A)	Homeobox-leucine zipper protein PROTODERMAL FACTOR 2 OS=Arabidopsis thaliana GN=PDF2 PE=2 SV=1
	Sa79F.141	Sa155F.68.1	GO:0008565; protein transporter activity; Molecular Function::GO:0009306; protein secretion; Biological Process::GO:0015031; protein transport; Biological Process::GO:0016020; membrane; Cellular Component	IPR003369; Sec-independent protein translocase protein TatA/B/E::IPR003998; Twin-arginine translocation protein TatB-like	hypothetical protein; K03116 sec-independent protein translocase protein TatA (A)	Sec-independent protein translocase protein TATB, chloroplastic OS=Pisum sativum GN=TATB PE=1 SV=1
	Sa79F.141	Sa156F.52	GO:0003333; amino acid transmembrane transport; Biological Process::GO:0015171; amino acid transmembrane transporter activity; Molecular Function::GO:0016020; membrane; Cellular Component	IPR002293; Amino acid/polyamine transporter I	An09g05010; choline transport protein; K19564 choline transport protein (A)	Amino-acid permease BAT1 homolog OS=Oryza sativa subsp. japonica GN=BAT1 PE=2 SV=1
	Sa79F.141	Sa161F.36	GO:0008519; ammonium transmembrane transporter activity; Molecular Function::GO:0015696; ammonium transport; Biological Process::GO:0016020; membrane; Cellular Component::GO:0072488; ammonium transmembrane transport; Biological Process	IPR001905; Ammonium transporter::IPR024041; Ammonium transporter AmtB-like domain	ammonium transporter 1 member 3-like; K03320 ammonium transporter, Amt family (A)	Ammonium transporter 1 member 3 OS=Solanum lycopersicum GN=AMT1-3 PE=2 SV=1
	Sa79F.141	Sa161F.41	GO:0005215; transporter activity; Molecular Function::GO:0006810; transport; Biological Process::GO:0016020; membrane; Cellular Component	IPR000109; Proton-dependent oligopeptide transporter family	oligopeptide transporter, putative; K14638 solute carrier family 15 (peptide/histidine transporter), member 3/4 (A)	Protein NRT1/ PTR FAMILY 5.1 OS=Arabidopsis thaliana GN=NPF5.1 PE=2 SV=2
	Sa79F.141	Sa184F.35	GO:0003700; sequence-specific DNA binding transcription factor activity; Molecular Function::GO:0006355; regulation of transcription, DNA-dependent; Biological Process	IPR001471; AP2/ERF domain	ERF3; ethylene response factor 3; K09286 EREBP-like factor (A)	Ethylene-responsive transcription factor 9 OS=Arabidopsis thaliana GN=ERF9 PE=2 SV=1
	Sa79F.141	Sa187F.13	GO:0003700; sequence-specific DNA binding transcription factor activity; Molecular Function::GO:0005622; intracellular; Cellular Component::GO:0006355; regulation of transcription, DNA-dependent; Biological Process::GO:0016602; CCAAT-binding factor complex; Cellular Component::GO:0043565; sequence-specific DNA binding; Molecular Function	IPR003958; Transcription factor CBF/NF-Y/archaeal histone::IPR027170; Transcriptional activator NFYC/HAP5 subunit	hypothetical protein; K08066 nuclear transcription factor Y, gamma (A)	Nuclear transcription factor Y subunit C-9 OS=Arabidopsis thaliana GN=NFYC9 PE=2 SV=1
	Sa79F.141	Sa193F.40	GO:0003700; sequence-specific DNA binding transcription factor activity; Molecular Function::GO:0006355; regulation of transcription, DNA-dependent; Biological Process::GO:0043565; sequence-specific DNA binding; Molecular Function	IPR001356; Homeobox domain::IPR002913; START domain	homeobox-leucine zipper protein HDG2-like; K09338 homeobox-leucine zipper protein (A)	Homeobox-leucine zipper protein HDG2 OS=Arabidopsis thaliana GN=HDG2 PE=2 SV=1
	Sa79F.141	Sa217F.43	GO:0006629; lipid metabolic process; Biological Process::GO:0016788; hydrolase activity, acting on ester bonds; Molecular Function	IPR001087; Lipase, GDSL	hypothetical protein; K00679 phospholipid:diacylglycerol acyltransferase [EC:2.3.1.158] (A)	GDSL esterase/lipase At1g29670 OS=Arabidopsis thaliana GN=At1g29670 PE=2 SV=1
	Sa79F.141	Sa221F.28	GO:0004553; hydrolase activity, hydrolyzing O-glycosyl compounds; Molecular Function::GO:0005618; cell wall; Cellular Component::GO:0005975; carbohydrate metabolic process; Biological Process::GO:0006073; cellular glucan metabolic process; Biological Process::GO:0016762; xyloglucan:xyloglucosyl transferase activity; Molecular Function::GO:0048046; apoplast; Cellular Component	IPR000757; Glycoside hydrolase, family 16::IPR008264; Beta-glucanase::IPR010713; Xyloglucan endo-transglycosylase, C-terminal	probable xyloglucan endotransglucosylase/hydrolase protein 6; K08235 xyloglucan:xyloglucosyl transferase [EC:2.4.1.207] (A)	Probable xyloglucan endotransglucosylase/hydrolase protein 7 OS=Arabidopsis thaliana GN=XTH7 PE=2 SV=2
	Sa95F.131	Sa112F.112	GO:0003700; sequence-specific DNA binding transcription factor activity; Molecular Function::GO:0006351; transcription, DNA-dependent; Biological Process::GO:0006355; regulation of transcription, DNA-dependent; Biological Process::GO:0043565; sequence-specific DNA binding; Molecular Function	IPR004827; Basic-leucine zipper domain::IPR025422; Transcription factor TGA like domain	BZIP transcription factor family protein isoform 1; K14431 transcription factor TGA (A)	Transcription factor TGA4 OS=Arabidopsis thaliana GN=TGA4 PE=1 SV=2
	Sa95F.131	Sa122F.62	GO:0015031; protein transport; Biological Process::GO:0016020; membrane; Cellular Component	IPR002208; SecY/SEC61-alpha family	protein translocase secy subunit, putative; K10956 protein transport protein SEC61 subunit alpha (A)	Preprotein translocase subunit SCY1, chloroplastic OS=Arabidopsis thaliana GN=SCY1 PE=1 SV=2
	Sa95F.131	Sa135F.11	GO:0003677; DNA binding; Molecular Function::GO:0003700; sequence-specific DNA binding transcription factor activity; Molecular Function::GO:0006352; DNA-dependent transcription, initiation; Biological Process::GO:0006355; regulation of transcription, DNA-dependent; Biological Process::GO:0016987; sigma factor activity; Molecular Function	IPR000943; RNA polymerase sigma-70::IPR007624; RNA polymerase sigma-70 region 3::IPR007627; RNA polymerase sigma-70 region 2::IPR007630; RNA polymerase sigma-70 region 4	hypothetical protein; K03086 RNA polymerase primary sigma factor (A)	RNA polymerase sigma factor sigF, chloroplastic OS=Arabidopsis thaliana GN=SIGF PE=1 SV=1
	Sa95F.131	Sa155F.68.1	GO:0008565; protein transporter activity; Molecular Function::GO:0009306; protein secretion; Biological Process::GO:0015031; protein transport; Biological Process::GO:0016020; membrane; Cellular Component	IPR003369; Sec-independent protein translocase protein TatA/B/E::IPR003998; Twin-arginine translocation protein TatB-like	hypothetical protein; K03116 sec-independent protein translocase protein TatA (A)	Sec-independent protein translocase protein TATB, chloroplastic OS=Pisum sativum GN=TATB PE=1 SV=1
	Sa95F.131	Sa161F.41	GO:0005215; transporter activity; Molecular Function::GO:0006810; transport; Biological Process::GO:0016020; membrane; Cellular Component	IPR000109; Proton-dependent oligopeptide transporter family	oligopeptide transporter, putative; K14638 solute carrier family 15 (peptide/histidine transporter), member 3/4 (A)	Protein NRT1/ PTR FAMILY 5.1 OS=Arabidopsis thaliana GN=NPF5.1 PE=2 SV=2
	Sa95F.131	Sa217F.43	GO:0006629; lipid metabolic process; Biological Process::GO:0016788; hydrolase activity, acting on ester bonds; Molecular Function	IPR001087; Lipase, GDSL	hypothetical protein; K00679 phospholipid:diacylglycerol acyltransferase [EC:2.3.1.158] (A)	GDSL esterase/lipase At1g29670 OS=Arabidopsis thaliana GN=At1g29670 PE=2 SV=1
	Sa95F.131	Sa248F.34	GO:0006629; lipid metabolic process; Biological Process::GO:0016788; hydrolase activity, acting on ester bonds; Molecular Function	IPR001087; Lipase, GDSL	hypothetical protein; K00679 phospholipid:diacylglycerol acyltransferase [EC:2.3.1.158] (A)	GDSL esterase/lipase APG OS=Arabidopsis thaliana GN=APG PE=1 SV=1
