# Supplementary material for: Identification and expression analysis of the GDSL esterase/lipase family genes, and the characterization of SaGLIP8 in Sedum alfredii Hance under cadmium stress
Source: PeerJ. 2019 Apr 16;7:e6741. doi: 10.7717/peerj.6741 (PMC6474334; doi:10.7717/peerj.6741)
Supplement: Table S7 — The direction of promoter sequences is from 5′to 3′. Sa, Sedum alfredii. [file peerj-07-6741-s008.xlsx]

## Sheet: Sheet1
Table S8 The promoter sequences of SaGELPs
No.	Name	Sequence
1	Sa0F.11	TTCGCGAAGTAAGATATGCATATTTCTGGTTGAACAATAGCACATTTTGCATATGAAATAACCTTGCCTGTTTGTTGTGTAAAATTATTGTTTTGCATACTTTTGTGAAGTCTGATTGTTGTCGTTCGTGTTGTGTATTCAGGGAGGTAATGGAGAAACAAAAATCTCGTGAACGGTTCCTGAGGCTGCAAGAGCAAGGAAAGACGGAACAAAGCAAGAAAGACTTAGGTAAATCAACCTTGTTAATCCCTTTACAATAAACAGTTCTCATGACTAGGCTGCACGAGATAACATTGTTTCATTGTTACAGACCGTCTGGCACTCATCCGTCAGCAACGAGCAGAAGCTGCCAAGCAGCGTGAACAAGCAAAAGCTGGTATATCATCACCATTCACTCAT…
2	Sa0F.223	CAAAACTATGTGCGATGCAACGAACAATTTAAAAGCTAATGAATTAAAACCTTCGGTGGCTTAAATGGGTAGTCCGGAGGAAAATGAATGGCGACCATAAATACTCCGCCGGCATAGGGACTGTCAGGAGGACCCATAATTGTAGCCTGCCAATGAAACATATCTTCTCCAACAGGTCCTGCGGCACCACTCAATAGTCAATACACACACAGACGTGAACTCAACTATTTCCAACAAATCCATAACTAATTGATTAACAACAACAACATCAAAAAGAAGCCCTAACTTAGCTTTCAACAAACACAGTTACACAACACAAGCAAATTGATTGTAACTAATGGATTCAACAATAAGAATTAAACGCCAGAAATTAAATATGAAAGTAAAATTAGGTTATGG…
3	Sa0F.262	CATAACCCTCCTATAGCAGTCCTGACATACAAGCGGCGGAACTTCCACACTCAACCTCACCTGTCACACAAAGACGCACTCGCATAATGTACACCAAATTAAAATGAATCACACAACAGAAAACATTAAATAACTAAGGTTGAACGAGTATTAAACCCTAGAATTCGGCTCGGCAATTTGCAACACGGTCAACTCATCCGGAAGCACGTCTGGTGCGCTGGACTCAACGGAAGTAGCGGGAGATGCTGCGGCCGTACATCGGAAAGGATTGCGTCGAGTTAGAGACGAGAGCGGAGAGACTGTTAAGGCGAGAGAAGAATGATGAGCAGATGGAGGAGGAGCTTTGATGGTGGTGGTGGTAGATGGAGTGACTGAGCGGATATGGTGGCGGTGGGAGGA…
4	Sa0F.41	AACACCTTATCATCAGGTCCTTTGAAACTATCTGTAAAATGGAAGAAGAAGCAAGACAAAGTGCATAAAATGAGGAGTAGATTCATCATTAGTTTAGTAACATGGGAGCATTCGCCTGTTCGGTAGATTGTTGGAAGGACCATTTCGAATGCGAGGAGGGTTCCGGTTGGGAGGAAGTTTCCAAGTAATGATGTTTTTGAGAGTGTTTTTTGGACACCATTTGCTACCATTTTGCGTTTGAGTCCTTGGTTTTTGTCTAGGCGAACGAGGCCGGGTTTGGTGGTGGGGGTTGTGGTGATGGTGGTGGTGGTGGAGGGTTCGGGTTTGGTTGGTTTGGGTGGTGGGGTGGTGGAGGGATTGTAGACTCTGACTCCATTGCCTTCCTCCATTTGTTGCTCC…
5	Sa0F.898	GGGAATTTCCGGGAAAACACCACTATGTTTAGGGTGTTTCCCACTAAGTTTTTTTTTTCTCTTAAAACACCACTATGTTTTCGCAATCACTCATTAGCACCACTTTTTGTAATTTATGGAAATTATATAAACATAATGGTGTTTTAATGGAAATTATATAACATATAGTGGTGCTTTTGTGGAAATTATATAAACTTAGTGGTGTTTTCATGAGATTTTTTAGGTCAAGTTAATAGTAAAAACCTAAAAGTGGTGCTACTGAGCGAACTTACAAACATAGTGGTGTTTTATGAGAAAAATTTAGTGGTGTTTTCCCGGAAAAACCCCATGTTTTAAATTATATGTTCACTTTCTTTTAATATGGATTTTATTTAAAAAAATCTATGTACAAAATTATCC…
6	Sa105F.31	TTTGAAGCTTTTGTGAAAAATCGGTGGTGAGCAGCTTTCGTGTAAATACCTGCAAAATTTACATGGACAAATTAAGCTTAAGAAGATAGAGGAACATTGATCTATTCAACTACCATAAAATGTAAGTAAGTTGATAAGACTCACTCAAGAGCGCGAGCAGTTCCCAAAAAGCAACCTTGACACGGGTATTCCATGTTAACGGTGATGTAATGTACTCATCTGAAAGATGCAGGAAATCATGGAGCGAACCATTCTTGTGAAATTTAAATACCAGCAGGTGCTGACCATGCTCTGAACAATAGCCAACTGGCTCGGCTATGTTTGGGTGACGCAGCTTTGAAATGGTTGAAACCATCTCAAAAATATTAAATACTTTCTAACTCTTCTTTGATCTTCTCA…
7	Sa10F.217	AGAAGAAAAAAAAACAAAATAATAATACACAAGTCTTTATGCTTTTAAGTAGAAGTTTAATGTACTGTCAATGAAAAAAGAAAGTGCATTGAGTAGTAGTAAAGGTAATACAGCACTGTACATATGTATGTTGTTCATAATTAGGTCTACAAGTTGGTATTGATGCTCAATTCCCAGCCAGGAGCAGACACACTAAAATTTACGAGTAGAGATCTTGAAATGACCTTATGTCTAAATTCATTGAATCTGGTCACCTTATTGAGCTGTGTTTTTCTCCTTTATAAACTCCTTGTTGCCCCCTTTGTTAAACCTCTTGCAACATAAACCAATCGCATGTGTTGCTAGCTAAATAAGGTATTTTTGTTCTTGTTCTATTCATCATCTTCCCCACACCACTCT…
8	Sa10F.441	TTTAGTTGTCTTTGAACACTGTCCTGCAGCCAAAAGTTTCATCTGCCATTGTTGATCTCGCGGGAGAGACAGCAGCAATATGGCCAATAGCTAATGCTAAGGAAGAGGCAGAATGGAGGAAACTATTAGGCCACGCAATCGCCGCTCATTTGACGAACTGTGGCTTTCAGTCTAGCTTTCGAGGTTAGCTTTCTTCAGAAGACAAAACTTGTAAAGATTTAGTAGAGAGTGGAGTTCATTATATGATCGATTACATTGTGTTTCTGTTGTGACATGCCTTTACTCTGATAGTCTGATTAACCATCTTTAAATTCAGCACATTAGCATATCAGCAGTCAATTTTACAGTAAATTCAACCCCAATTTGTTTTGCAAACCAATTATAGATAAAAATTGTAGG…
9	Sa110F.22	GTCGCCCCGAATTTTTTGAGTTTGTCACCCCCACATAATTCCATGTCACCTAACTCAAAAAATTGGCGTAGTGATAAGAAGAAACAAAAATAATAATAATGGAATATATGTTCTGTAATTCCAAGGTTTATTGTGTTGGAATAAATTGTCAAATTTAATCACTAAATTAATAATTGAAAGTAAATGATAATTAATCATGTTGTGTAGTTATGAATTAATCGAGAAGTTCAACAGTACCAATCAAAATATAATAAATGCGTATCAAATAGTAACCGCATTTACCATAACATGACTCTCTTTTAAACCTGATTAATTCCTAATGAATAACAAGTCTAGCATCTTAAACTTAAATATAATAAACATGTTATGAACACAAACAGATAAATCAGTTTTGTATTA…
10	Sa116F.110	TATAGGTTTTTCCATCCATAAATGGAACTTCATATTTGAAGGAAGCATTACAAAAGATGGCAGCTATCCTAGCCGAAGAAACATCGGTAAAAATATCAAAACCAAACTCCGATCACTCTACTATATATATATTTTTTCCGTATAGTTATATTCTGGTGACTGACATTGCACTCTTGATTACAGGCTGTTGAGGTTTTTTGTACCTCTCAGAATGAGAATGACATGAAGTGGGAACAAAAGCTTATGAAAGATTTTCCCTCATTGAGGCCATTATAACTTATAAGTCTGTTAACTCTCTACATTATAGTCTATCGAGCATCTTAGCTTCAACGAGCATCAGTCAATTCGAAGATCTTTAAAACTATAAGTGCGACCTGACTTATTTAAAAGTGCAATTCT…
11	Sa116F.65	TGTAAATTTGTAATGACACTGCTTTCTCACTAGGTAGCTAAAGTTACTTAGATTGCTGCGTAGCTCCTTATTCAATGATTTTGCGCTGGTAGAACTCAACATTTATTTGGAATCTGCAAAGAAAAGGTTGATGTAATTGTATGCCCAATCTCAACATTTATTTAGAATCTGCTGAGTTACCTAGCTAAAACTAAATGGCCCAATCTTAAATTATTAGCTTAGCTGTTTTATGTCTATTTCTGACCAAGTGTATTTTCCCAGGATGTGGATATCGAAGAAAAGGTCGATGTAATTGTATCAGAGTGGATGGTTTAAATGCTTTTATATGAGGTATCTTGCTGATTCTAAGTACATACTAAATTTTCCTGTTAGCTGATATATCCTTGTCTATAAACATAG…
12	Sa121F.27	AATCATGACTGACTCCCCAACCAATGAACCACCACTCCATTGACGAAAATGCATTTTAGTTATTATTAGTATTATTTGTTTATTTTTTGAAAATTTAGTGGTTCATGTTGTAATTTGATAATTAGTTGTTCTTAAAAAAACAATAAGATTTTATACACTCGTTTAACGGGATTTACATATACACGTAGAAACTAAAATGTGTTGTGTAGCTTTCTTTTGATGGGAAATTGAGAGATGTACCTGATTAAGTACTAATTATGGTTTAATTTTATTAAGCATTAATTTACATGGATGTGTTGGAGAGTTAACATTGGAGAAAGTTTCAACAAGTATGGACCATCCTTTAAACTTTAAAGCATCAAATTAGGACATAGCCATTTGTGCGCATCTCTTGCTTGT…
13	Sa129F.2	TTTGGTAAGACTATCAAATTTTGTTACTTACACAAATTTACATTCATGATGTGAAAGAATATTTATTTAACATAACTTACTTCACATATCAATAAGCTTTATGCACCTTGTTCATCTTTCCAAAACTCTAATATTTCAACTTTTATTGGTAAAGTCTATATATAAATTACACAACTAGACGATATATATAAATAGCTGTGTTTTAGTAGGATATTAATAATTTGAGTATGTATTAACAAAATTTTAATATATGTGCATTTATTAGAAATTGTAATATAAGAGGAAGGTTCAGAGAGGACAGATAAATATTTACAGGACAAAAGGACGCAATCTCGTGCGTCCATTTAAAATCAATCAACAATCAAGATTAAAACAGAACCAAATCCCAACTACCCCGTG…
14	Sa12F.49	GAGCAAGCTTTAAATTTTGACTTTAGTAGCAACGTAGCGTTATTATTCGAGTATTGTAGTTGGTTTATTAAAACAGCATTGTTTCTAAACTTACGCAGGGATGAAGAATACGACCGTGGGAAGCGGAAGAAAATGAAATCAGCAAAGTACTCATATGACGGAACAAATCCATTCCAAGAAATCGCTACCAGCAAAGCGTCATCAATAAAATCGAAAAATGATCAATCAAGTTCCGCAAATCGCCCATATAGGATATTCTGAGTGAGCTCTGTGGTCATTCTGGTAAGCTCATCAACTAACTTATCTGGAAACCGAAGATGTCCTTAAAAAGTAATTGGGCGATCTTCAGTTAATAGGTGTTTTGTTCTATCGCCCTTTTTTTTGAAACATGTTGTGCTG…
15	Sa136F.34	GACCGGACCGGACCGAATTGATTCGGTTCGGTCCGGTCTTCGGTTCGTAGTTTCTCAATATTTCGGTCCGGTCCGGACCGAATGTGCATCCCTAATTATAAATTTCATTTTGCACTCATTGAAGGGGTCCATTTTTAAATGCATTTAAAATATATAGTTTGCTATAGTAAGCCTTTATAACTTTATTGTATGCACATAAAGTTTATAACTTTATTATAATAATATTATTTTATTTAAGCCTTTATGGTTTTCATTTCAATAGATGGGACCTTTTTACATAAAAAATTAGGCCATTTTGATATAAAGTAATCCATAAAAAAAATTTGGGGCCTAAAGCCATGATTTTAATAGCCTCAGGCTAGAGTTGGGTCTGATTATAACAACTCATTTTCACTCATA…
16	Sa13F.102	TGACGATAAATTGAGATGTACCTGATAAAGTACTAATTATGGTTAGTATTTATCGAGCATTAGTACACATGGGTGTGTTGGATAGAATGGAGAAAGTTTCAACTTCCGGGGTGGAGGAAGGATATCACCTCCTCCTTCCTCAGCCCCAATGAACCTTTTCCTTTGCGCATAATAAATCAACTCTCAGATCTGGAACTGTAGAGTGGCGGTTCATCCCAATGAAGCTCAGATTTACTTCCGAACCTTCGTGAGAAGCTCAGATTTGGATCTGCGTTGAAGAAGGAAAGCGGCGACATCTTCAGATTTGGATATGTGTTGAAGTAGGAATGCGGCGGCCTCTCCGACGCGTTCATGTTTATTTTTACTTTCCCACCCTTGTGGTGGTTTTATCCACCTTTA…
17	Sa13F.118	GTGTGGCCGATGAGCCCCTGATCTCCAACAGTTTCTTTTACTCCGTTGTACTGTTAGTGTTACTGTATCACATAAGATGGTTTAAAAAGTTTTAAAAATATATGAGTATATATATTTTATCAAAATAATACGTATGGTTTAAAAAAGTGTAGTAGGCAGTGACGTTCACGCAGTACAACTGTAGAGAAGTCTAACTTGCTGGAAATAGAAGAGCCGCCACGCGTCACCCAGTAGCCGGCAGGAAAGAGACTCTGAAGGAGACAAACAGATTGAGGCTGCGCGGCCGCCATGGAAGCAACAAGCAACGAACGAAGCAGTTGCTGACTGCCATGGAGGGGTACCACCAGTGATACTGATATTCTCATATTCACATGCATTACTAATTCTCGTATCCTGGAA…
18	Sa14F.252.1	TGGATGGATTTGAAGTCTCCTTTGCCGTTTATGTCGACTTTTATGGTACGGTTTGTGCCGATTTTTTGAGTTAGTAAGGGTGAGTCGATGACGGTGTTGGCGGAGAGGGCGGAGGCGATGTGGAATGCGGATGATATGAGGATGAAGAAGATGAGGAGGGTTGGGTTCAGGGAAGGTGAAGTCATGGTTGCATGAAAGGTGTTTGATGAAATGCCTGAATGAAGTAGAGTTGAATTTGAGGTTGAAGATATCAAATGGTGCTGCAATTTTAGTTATTTTGAGGAGGCCGGAAGGGTGTCCAGTGGTTGATTTCTGTGGTCGAAGGAAACTACGGACAGCCTCAAATTTGGATTACTGTTTTTAGTGAATTTCGAACACTGCGTTATAATACTGCTTGAG…
19	Sa184F.22	ATACCAGTGTAAATGGAAGTACATGCACTTTAACGGGGAAAGAGTTAGAGTCAGAAGAAATTCACTGTTCGAATGAAGTGGTGCGGCTTGAAAGGTAAAACACACCAGCTTATAAATGTTACCCTCGGATATTATTCCAATAATCTTACATGTCTATTTAACAATTTAGTTGATATGAGTTATGACTCTATTAGGTACTTGTATTTACACAAGAGTGACGAGGCCATGATCATATCACAAGAGCTGTATCTGAAAGAGACCTCTTATGAATCTAATACAGATAAGACACCATAAATGCATCATGTGTTAGGTGATCGAATTGAGCATACGAAATCTCAAATCCCAAAAGTGGAGTCATATAATATATATCACAAAGCTGATTTGGGTCATTGTCTTCTA…
20	Sa18F.151	TTTTGACTGTTGATTTAGCTCAGCCTAGCGGTAAACCTAGATTGATACCAATTCGTGATATTAGATTGACTTTTCGTAGTAATTAAGCCTAGCGGTGGAGGTATTGCGATTCGTAGGTCTAATAACCATTACATTTACTTGAGACTCTAGCGGGTAATAGTAGATAGAACCCTAAATTAGGCTTTCCTCTAGCGAGACTGTCTGATTAGAACAGGTAGCATATTACTCTAGCGAGTGTATGTAGGTTGTATCTCTAGCGGGAACGACTGTTTTATTTTACTGATTTATTATATGTTGGTCGATGATAACTAGTTGCAGTGCGATTCCCTGAACTGATCTTTCTCATATTTGACACATCTTTTATTTACATTCTTGCATTACAAAACCAAAATCATTACA…
21	Sa1F.117	ATAATTAAAGTGTAAAAAACGTTTAGGGGTGTAATTGAAACGATAAAGATAGTTTAGGGGGGCAGTTGACACAATGCTTAGTTTAGGGGGGGTAATTGACACGATAGAAAGTTTAGGGGTGTAATTGACACGATGCAGATAGTTCAGGGGGCAAATTGAGAATAAGCCATATTTTTTTGGCTAATTCTCAATTTGCCCCCTAAACTATCTAGATCGTTTCAATTACATCCCTAAAGGTTTTTTACACTTTAATTATCAAATAAACAAGAGTCTTTTGATCGTTTAAAATTTGATACTAAATTTTAAATTTAAATATTCTTTTAAAACTCATATACACCTATACATTTATATTTAAAATAATCTTAAATTTAATTTCAAAGCTCTTAAAGTATCCGTTTT…
22	Sa207F.22	ATTCATGTCGTTGAGGATGGTTTGATCGAAGTGATATTTCTATTGAGGTTGGAAACTATTTGAATTTTTTGTGTGACTGTGACTTAAATAGGTAAAATTGAAAATCTGTTAACGATTAGATATTTGTATTTTTTGATAATGATAACGATTAAGAGTTTTAAAAGTCGGTTTGTTTTAGATAAGATTTTGGGCTTCATCAATAACCGCTAATTACTCCTTTGCAAATTAAATATAGTTTGGTGTGGAATGCTAGCATACATTGACTTACACCCTCATTCAATTCAAAAAGCTTCAGCCCATGAGTTGTGGTGGTGTAACTCAATATATGCTTAACACTTTTCTTTAATCTTAGCGATGTGGGATAGACAACTCTCTCAAGTGCACATATATCTCAACACT…
23	Sa20F.120	AGAGACTCCTCCAGGATTTTCTACGAGACACTCTATCAACAAGTACCCACAAGCGAGATGGCTCAAATCTGGTAAACTATCTTGTTTTCAGCGTTTTTCTTAAAGTAATGCGATTGAGTCAAAACTGTCTTAAACTGGTGTTCACAAATTAGATTAGGATAAGTCATTGGAATTTTGATGATTTGTGTAAAACTTTTTTTACAATGTATTGTAATACATGTCTAAAACCTTTGGTCACCCTGACTATGTCTTGCCCTGATCAAAATAGTTTCTATGGAGCTTTAAGGCCGTGTCTTGAGTTTGTACAATCTTTGTCATACTAGCTCAAATTGTCCTAATAGAAAGGGTTAAGTGTCTAAATCATGGAATATGAATTGCTCAAAATGTACCTAGTTAACT…
24	Sa217F.43	TTCACGGGCATTCAAAAATATGGGTCAGAAAGAAAAACAAAAGCTAGTTCTCGAAAGATATCAATGCAAATGGAAGTACATGCACTTTAATGGCGAAAGAGTTAGAGTGAGAAGAAAGTCACCGTTCGAATGAAGTTGTGCACGCACAAGGTAAGAATCACCAGCTTATATGTTAACCTCCAGATATTTATTCCAGTACTCTTAAAAGTGGATATAACAATAAAGTTGATCTGACTCTATTAGGTATTTATATTTACACAAGACAAGAGTGACGAGGCCATGATCATATCACAAGAGCTGTATTTGAAAGAGACTTCTTTTGATCATTTGAGCATACAAAATTTCAAATCCCAAAAGTGTAGTTTTATATCACAAAGCTTATTTTAAATTTTTAATCAT…
25	Sa248F.34	GCTATAGCCATGCTTCAGGTCTCCATTTCTCCCGGCAAGCGTAAACATCATGCATTTAAAGAACCATTGCATGTCTTTAGCCAATCTCTCAATCTACACTACTCATTTTATAGACACTATTATCTACACTTCTCCTACATAGTTGACAACATCTATTTATATCTAGTCAAAACGATGCCGTTTTGATGTGTTTTACTGTTAAACTACATAATATTACTGAATTCATTGTCTAAAACGACGCCGTTTTGATTGATGGCTGCTATGGATCGGATTTGGATCTCAGGCAGCGAACAGCCAAATCCAGCCAATTTAAAACGACATAGTTTTGAAGATTCAAAGTACTAAACTACGTAGTTTTACGACGGGTTCAGCAAGCCCACCTTGTTTAATAGTATAATA…
26	Sa24F.223	TAACCCCAAGGACTCATCGTTGACTGGCTACAACCTTAAAACCTGTCGATTTCGAACCATCAGAATCCAATGGCTTCAGCTATTTCTGCAGATTCATCAAACTTTGCTTCTCATATCCCAATCGATCTCTTTGTATCCAAGAAACATCCAGGCCTTCCACCTGGAACAATCGGCTTCACAGACGCCACCGGCAACATAGTTTACACCGTTCAACCTCATTCATCTCAGTCCTATAAACCCCGCTTCTTCCGCCACCGTGTCCGAGACTTTTCCTTGCTCGACACTGATGGCCATCCTCTCATGACTCTAATCCGAAAAGAGGTCAGTAATTCACTAAATTCTTGTCCTCATCGAAATTGTTGTCTACTTTTGTTGACGATCATGATTCGGTTTTTTTGA…
27	Sa24F.262	ACTTAGGCGGTTGTTTTAGAGACAACATCCATGTTGTCTAATTTTGCTGTCTAAGTGTTGTCTAAAAAAGTAAATTTAGACAACATTTATACATTTATCTAACAATTTTTTCGTTGTCTACAAATTCTTGAAAATTTGTAGTGATTTCATAAGAATAAGCGTCAAGACTTGTCGCAAACTTGACTATAAGATTACAAGTGTATATCAAACATAGTAAAGCCAAGTAATAAACATTCAAAGGATCACGGATCCGCCTTACACCGAACAGCCATTTACAGTCATATAAATTATTATTTTTATAAATCGCAATTCTCTGCACCAAATCTTAATCTGCATGACAATACTGATACACAAAAATTTACTAAAAAATACTAAAATCAAGAAACAATTGATAGTTAC…
28	Sa258F.41	ATAAGTATATCACATATAATGGGGTGATGGCCCATTGTTTGAGGAGCCGATCAAGTTTCCTCATGGTCAGGGGTTCGAATCTTGACCTTCACCATTTAATTGTTATTTTCTTGTTTTAGGTGTTTGCTTTACTTTCCTCCCGTTTCCAGGCGAGGAGGCCCTTTCTTCCTCCCGCGAGGAGGCCCTTCCTTCCATCATGGTTGTTTGTATCGAGATGACTCGAGCTAAAATGATGCGCTGCTTGAATGTCGTGTCAAGAGTATTGGTAGAGTTGTCAGAGATTGTCTGAGCTTTAAAATGAAGATAGTGTACTAGATATAATCTACATATGCTTTAAACATACTCTTGTACTACATGTATCCACCCATCGGGAAAAAAAAGTACATCAAATATTTTGAC…
29	Sa26F.146	AAAATTAAGTACTTATTGAAATTGTCTCATTTTATTTGGTTAAATGAGGAATAAAATAGTTATTAAGACATTACAAATTCAGACTCATCAATGTAGGCTTTTGTGTCGTATATAAAGTGTAATCATAAGGCCAGCCCCATTAGGGCCCAATTAGGAATGTGTCTTGAGACCAAGATGTGCAACTATAAAGTTACAAGAAGCCTAAGCTACTACGATGTTATGTATTTTATACTGATATTATCCATTTTTCGAGACAAAAAAATCTTATTTAAATTAATAGATCTTTGATATTAATGCTTGAATATGTTTTTACAACACATATTTGGAAACCAAATTTTAGTTTGCTGTCCATATTATATGGCTTGTATTTTTGATTTGGAGTCAAATAGAGTAATATTT…
30	Sa26F.158	GTAAAGCATTCGAAAAGAATTCATAGTTTTGTATGACTTTTGTGTTGCATTGATTCCAAGTAGTGTGTGTCCGTAAGAACATGAAATTTTAGATGTTTTATGCTTGTCACGAGTAGTCTAACCGTTGTGCTACTTACTCTATGTAATTCCAGGAGCACATATCAACTCTTAAGGCCTGCGTTTGAAATTTGAAGTAGAATGATCTGCCGCTGAATAGTGAATACATGTCAGTCACCTTAACTCCCTCTTGTGTTAGGTAACCGAATTTCGCACACTAAACCTTAAAACCCCATAACTGGAGTCCCTGTATCGCAAAACATATGCACACACATTATTGTTTTTTTCTATGTGTTTTTGGTTATTCAACTTCAACTACACAGCTTTAACTCTCCGCCTTCC…
31	Sa27F.42	CCTTGATACAGTGATTGGTAAGCTCATCCTCCCTAGTCCTTATCCAAAATTTCAGGTTGGCGAAGCTGTTGTAATTGTCAATATTTGTTGATGATGCCACCTTAATCGTATATTTTTAATCGGACATGATAATGATATATATACAATTTCGAAACAAAATCATGGATGTATGGTAGATAAGAAAGACTATATAGTAAAAAAATTACGGATACTGATGAAACAATTTATCAGATATCGATGAAAGTAACCGTCAAAACTTAAATTATGGAGAAGAACCGACGATAATGTTTGAGAGCACTAGCCAATTCTTATTAGATTAGATACAATTATGTTATAATAAAGTGTAAATGGTAGAAAAATAATATTATATAAAAGTCATTTTATATATAATTTATAAAA…
32	Sa28F.36	TGCATGTTTCTGTGCATATTAAATTTTTCGAGTTCCCTTAAACTTTACTGTTGTTTTCTGCAATGTGTCAAACAAACAATAAAATATTTTGATTAGAAATCTTAAACTGTTTTCTGGGAAAACTCCGAATACAGTTATTGTACCACCAGCGAAACCAATCTATACTCTCAGTTCAATTACTGAGAGTCATGCTTGTTTTTTTATTATCAGCTAGCTAGATTATTGTGTTATGTTATTATTGAAATTAGCTCAATACGCCTGTGATGCAAGTGCGGAGTGAATCCCGCTAATCCACATATAAACGCTTTTCTGTGCACATGCAGGTATCATAACTTTACATTCTCAACAAATCACGTGGAGCTTGCTAGCTAGTGATTGTTGCAACTGAAACTTGAGCAG…
33	Sa28F.37	CCTCATAGGAATGGTAAGTCATTTTTCAATTATTATTACCGACAAAATCGTCACCAGTTAATATACTAGTTGTGCATGAATTTGGATCTGGTGCAGCCAACTCCGTTTTCCAACCAAATTATAAAATAAACTTTTAATATCTCGTCCTATTATATATAATGCCTATATTAAAGGTCTTAGACTACCCAAACTATTTTATAAGTTAAGATAAATCTGAAAAATTATTTGGCTGTATGAGTGTTCGCTGCACGGGATGCGAATCCGTTGTACATGTGATAGATCTTATGTTTACTAAAAAAAATTTCATTTTGGATTTTTTTGAAGGATTTGAGGTGGTGGATAAAGGGTGTTGTGGCACTGGAGAAATAGAGGTTACTATCTTGTGTAGCGACTATGTTC…
34	Sa28F.38	TATTGTTATCTCACTAGAAAATTGCTAATGTTGGTTAATTTGTGTACAATAATCCAAGTTTACACGTTTTCAAACTATCATACTCCTTAGAATCTATGAATCATTTGTAAAGTACATATTAAAAGTAGCGCCGAAGACTAAACCCTAAATCATAATCCCAAAACTAATCATTGATATGAATTAATGTTTACAGGGTTTGATGTGGCGGACAAAGGATGCTGTGGCACTGGAAATATTGAGGTCACCTTTCTGTGCTCTGAATACAACACACTACAACCCTTAAAGACATGTTCGGACCCAACAAAGTATGTATTCTGGGATAGCTTTCATCCCACACAAGCAACTTACAAGCTTATTCTCTCTGCAAAGATTTATGCAGAATACTTTTGAACATTTTTG…
35	Sa28F.39	TTTAGTCTAACAGTTACACTCTTGATAACGTTCAAATGACCTGATTTATTTGAGTGACACAGCTAGTGAACTATCGATCAAAGAGTACTTACCGGCGTATCATGATCCAAGTTTGCAACCTGATGATCTCCTCACCGGCGTCAGTTTCGCATCCGGCGGCTCTGGTTACGATCCCATCGCATCTTTCGCAGCGGTAAATAAAAAAATAATGTATTCTTATAACTTATTTAAACAATTACAAATATGAATAAATATCAGAGTATATTTTAACCTGGTCGCGTTGCTGTAGATTTCGATCACGTTACGTCAGCAATTAGATCACTTCAAGGAGTACAAAACCAAACTCTATACCTTCGTAGGCGAAAACCAGACCAACAACGTTATATCTCGAGCCCTGTT…
36	Sa29F.188.1	AAACAAAAATTCAACTAAACGTCCTGAATCTGAAATCCAAACAATGCAGAAATTATCTTTATATCCTTTTTCATTTTTTTTACTTTTACTGATTGAGCTAGGTTTATAACTAAGTATTACACCCAAAGTAGGATACATCTCGATAACGGAGAGTGACCTTTTCCTCGAAGCATCGACGACCTACAAAAGTTTATAACTACTACCACCTTCCATAAGGAGTTGATGAAAAGAAGGCACACACACATCTTTACTTTGTAGAAGAAGTACAGCTAAATCTAAATGGCATTGACTTGTAGACTTGTAGTGCCCATATCCATTGTTTTTTTTTTTGGAAGAAAAAAACTTATTCGCTATTCTTCGAACACTCACTAGGTAATTTGACAGCCTAACTAATTTGAC…
37	Sa29F.343	TTTCATCAGCAATCAAATTCAAACCAAAACCACTAGGAAAAAATGCACTAAATTCAACAACATCCAAGGCCTAAGAATAAGAGCCAAACACCATCACAAAATAACACAAAAATCACCAAATGACACCAAAGTACAAACTTTCTTCCAAAACCATATTCCATATTTTATAATATCAAAACCGAACAATCTCATTTTCCTCAAAATCTTAAATAATCCAAACTTAAAACAAAAGGATGGTTCCAAACATGCAAACCCTAAAAATGAAACAATGACAAATAACAGCAAAACATCGATCCGAGCCAGATGCCAATGATGTGTTGCAAATAACAAATTCAAAAGCGGAAATGAACGAAAGATATACCTATAGCATAAAAAAGAGGGATCAGGAAATGGAGCCGA…
38	Sa2F.358	TATCATATATTTATACATCTGTACATACTGCGGAATGTTAGCATACATCGACTTACACCCTCATCCAATTCAAAAAGCTTTATTGGCCCATGAGTTGTGGTGATGTAACCTAATATATGTTTAACACTCTTCTTGAGTCTTAGCGATATGAGATGGAGTTGTGGCGATGTAACCTAATATATGTTTAACACTCTTCTTGAGTCTTAGCGATATGAGATAGAGTACAACTTCATCAAGTGCACATGTATCTCAACACATATCTTCATGCTTGCAAGTAACAAATTTGTAGATATTTTTTTATATTTAAATAGTTTGCTATATTAACTAATATAAAAATGCTGCTGAAATTACTATAGTTGATGACAAATTGTTTGTTCAATTGAGATGGGCTGGATGAAT…
39	Sa314F.6	AGCGTCTTTTCATCATGCAAATAGTTATATGTTCTCCATGAACATTCCTGCGAATAACGTGGTATCTAATTGTTGTTGACTATTTTTACGTCTACGTTAATAAGAAAATATTTTTAAAACAGAGCTTGGATATCACCGAGTCAACGCGAGTAACAAAAGCGCTGACATTGAAACAGTTGCAAGGAAAGTCATCGTATGTCGACCAATGCGTCTGCGGTGGACTTTTTATATATATGCATCGAAGCCACGCATACAATGTCTTATTAAGTCGTATTAGTTGTGATACACAATCAGTAAGTAATAATTAGTTGGAAGTAGACATCCTCATATTCAACGTCATACCATTTTTAGCTGTGCATGGGAAAACCATTAATTAGGGTTACTTTATTATATTTAATA…
40	Sa32F.165	AACCGACATCGATAATGTACTTTGCCACTGCCATCGAGTGACACTGAATTTTTTTTTTAAATCCCATGAGACAAGATTGCATCCAAGAAAGTTAATCACTCCAAAGGTAGACTTTCTATCGACTTTGTTACTTATAATCGATTAAGTCTAAATTTAAAAACTCTACTAGATCACTTGCCAATGAATGATTTGTCAAATGACAAGGTAACAAAAGCAGCTGAACTCAGGTCGCTCATATCTGGTTATCAGTATAAAGCACAAGTCCATTATTGTAGGTATCATATTACTATCAGCAAAAAAAAGGACATGCTGAATAAAAGCTATTAATTGAACATACAACTTGGTACCTCCAACATTGATGTAACAAATACCAAATTTCTACTATGAACAAATCATAAG…
41	Sa33F.119	GATGTAGAATTTGCTAGAAGCAATCACGTTAGTTCCATTTTAAGGCTCTTTTTTTTAAAAAAAATTCAAAATTAAGATAATCATATAAGACGTGGATCAGTGGAGATAACATCTTTTAGTAGTACAGAAGAACTTAATTAGAATTGTTGATTTTGATTAATTCGACGGTTGTGATTAAATTAATATTTTTGATAATAATATTATTTTAATTAAAATAATACTTGAATTTGTACAAAACACGGGGTGATTTAGATTATGTTCAGATTTAATCTTAATCGTTGAATAACTTTAAATGAACGCATAAGGTTGCGTTCTTTTTTCCTGTAAATATTTATCTGTCCTTTCTGAACCTTCGTCAATCATATAATATTTGTATCTATTACGATAAAACTATCCACA…
42	Sa36F.86	AACACAGTGGTGATCGTGATCGACCCAGCACTGGACCAGCTAAGGGTCTAGATGAGTCTGAACTCATGAATGTAGCATCAGTCAATGAGATCTCGTTAGACTCCATTCCAATCAAGAACGACGAAAGGATTGATAATTTTATCAACAATGGATTCGCTCTCTCCAGTGTGTGGACCTGATAACACATAACACAACACACCGATTCTTCGAATCGCATCCTTGCCATTATTCGTGTAGATATTTCTGTCTTTAAGGGGTTTGCTGGTTTTTTTGAGTTCAGCCCTGTTGGTTGCGGAGTCGGTCATTATTTTTACTTGCTGGAAATTGTTGTCAGTTGATTCGGATGAAGGTATGGATCGAATTTGTATTGGATAGATCTCTTCTTGCATTTGAGGTATA…
43	Sa39F.196	TAATATTATTATATTAATTTATATATGATTGATGAATCATTTGTAAGACTATGCATTTAATAATTTTATATATTAAAATTACATCGTTTAGTTACGATTAACTGTTCGCATAATTTTCCGCAACATTGGACTCTAGCACAATACACACCAACATTGAGGATTGATTAAGCCAAAGAAAACGCGTAAGACTTAATGAGTACAAGTTCGAATTCCGGATGCTCATAAAGCTTACCATTTTAACATTTGAAAGCTACAAGTAGTAAAATGGTAAGGTTTATGAGCATCCGGAATTTCGAATGTTAAAATGGTAATTGGAGTCGATAAATTTGAAAGCTACAAGACTTAATGACTGTTGGCGACTCTTTAAAAAAATGATTGAACTTTGGATACTACTTGGAT…
44	Sa39F.291	CTCTTCCGGCACATTCTTCTCCTCCCCATTCCCTTCCCTCAATCCGATCACCGTCGAACTTTCATTGCTCAAACACCTGATCACGGACCGAAACCCGGTACTAATTTTTTCCGCAGGACAAGAAAAGAAGACAAAGTTTTGTAGCTTCGCGACGGTGCGAAAAGGGGACGAGGAGAGATTGAATTGGTTTAAGCGGCCAGGGAAGCAGTTGTTTGGATCAGATATGTAGAGTTGTTGGTAGATGTAGTTGATGGATTGGACGGTGAAGTTTCCGGCGCGTGGGAGGTGGAGATTTGGTGAGTGTTGGGGAGTGGTGCATGAGAGGTTAAAGGAGGGTGGATATGTGCAGTTTGTTGGGATTTGTTGATTGGTTTGGGATTGGTTTGTGATGGTGAATGG…
45	Sa3F.277	TGGTGAATCAAGTGGATCTTAGATTCTTGGCTGCGGAGAGGAGAGGGATGATTGAGTATAGGAACGCTGGGATTAAGATTCTGGCTAGGGATTTGCTTGGGAAGGAGATTGTGAAGCCTAAGAGAGTTTCGATGAGTCGATGGGATACCGAATGGCTGACTAATGCGCAGGTACAATATGCTTGTTTGGATGCGTTTTTGTCTTATGAGATTGGGAGGGTTTTGAATGCATCTGTCCAAACTTGATAGCCATGGACTTGTGATTGTGAACTGTTGATGGTAAACTCTAAACTGAGCTTGATTTGAGAAACCATTGCGCTAAGATTATGATGTTCTTGTTGAAGTCTTTGGCTTTGGCTTGTTATGTATGGTGTGGATTTCAAATTTCAATAAGATTTTT…
46	Sa3F.554	AATTCCAAAACTTGGAGAGAGAAAAAAAATCATAAAAATTTAATGTTAAAAAGTAGTAATAGACATTACTTCACAGCGTGTTGTTTAGTGTCAAAGTATATACCGTGTCAAATGTGAAAGCAATTCTGAGATATCTAACAAAGTCGATATGATTTCAGAGCATAAGGCCGACCAAGACAAAGTAAATGGCAGTGAGACGTGTCTAATTAAGGACGCGCCATGGCTATGGAAACACACGTTTCACGACAGTCAGTACGTGACAGATCCCACGGATAAGAGCTGTGCTTAGAATATGCGTCCATACGAAGTGTGTGTTGTTGTTCTACGTACGTACATGAAGTTTAATTTAGATTATTATTTTTCTTTCAATTAGGTTGGATTTCGTAATTTGATTTCCAA…
47	Sa42F.134	TTTTTTGTTGTAGGCTGAGTCGACAAGTGCAACAAACGAATCAGTTCTAAAGGTTGCACTGGACCACGGTAAAGCCTCGGGAGTTATAAAATCACATGATCGAGTTGTTGTCTGTCAGAAAGTCGGCGATGCGTCAGTTGTGAAGATCATAGAGCTTGAAGATTAACTAGCGTCACTCATCTGCATTTCATCTAATGTTTCTTGTATGTGTAATAAGGCGAGCATGTCGTGCTCTAAACCAGAACTGTGAATCCATGTAGAGTGAGTAACCCAAACCAGAGCAGCATGGATTGAGTTCAGATTGTTGCGGGGCAAGACCTCATGCGCATGTTCTTGACTCTCTTTTTTTAACATCTTCCGAGCTTGAAAATAAATTGACTTTTTGCTGTTTACTCGACA…
48	Sa45F.55	AATTGTAGAACCTCTTTGGCCACAGCAGGCTCAGAATCCACCTTTGGAGAGGATGTATTATATACATCCACACTTGGTGCTGTCACATGTTGGAATCGCTGAATTTTGAGAAACATAAATTGAGTAACAGATCATGAAAATGCACTCATGGATTAATTCAATTAAATAACAAATCAAGAAGAAGCAGAAAAAAGTACCTTGTTGATGTCCCTCAAAAGCTGATAACTAACTATGCACAATTCAAGGTTCCACCCCTCCTTCAATATCTGTAAAATAGCCTCGCACATCTTGCTGTTCCCACAAATCGCACAACCGCAAGTTAAAACAATTTACCATTTCACATAGTTTTCAAGGAACTAAATGGAGGCACGGCAAGTCGGCAGATGGCAACCACCTGGT…
49	Sa46F.118	TACTCATTTCCATGATTGCCTAACAAAGCTGGCAATCAATCAACACTGATGTCTTGGAATCTTTAAGCTACTCTTAAGAACAAGACAACATTAAACCTAGCTAGGTTTTACAAAAAATGGGTACTAAAAACATGGGATGTCGTTTACCGAAATCAAGAAGACCCAGATCTTGAATACTGGGAATAATAAGGTTAAAGAAAAGTGATAATGGGTGGGTAGATCGGTGAGATTGATATTCCCAAATGCAAAGAATTTCAAAACTGGATCTTGAAATTTGGGTGTTGATTCTGAAGAACAGATCCAAAACTGGGAGGGTTTGTGAATGTGAATGAATGAAATGTATATATTATTTCATTTTTTGAATTTTGTTAGAATATTATTTTGATGCCATGGTTGTGG…
50	Sa46F.20	TTCGCGAAGTAAGATATGCATATTTCTGGTTGAACAATAGCACATTTTGCATATGAAATAACCTTGCCTGTTTGTTGTGTAAAATTATTGTTTTGCATACTTTTGTGAAGTCTGATTGTTGTCGTTCGTGTTGTGTATTCAGGGAGGTAATGGAGAAACAAAAATCTCGTGAACGGTTCCTGAGGCTGCAAGAGCAAGGAAAGACGGAACAAAGCAAGAAAGACTTAGGTAAATCAACCTTGTTAATCCCTTTACAATAAACAGTTCTCATGACTAGGCTGCACGAGATAACATTGTTTCATTGTTACAGACCGTCTGGCACTCATCCGTCAGCAACGAGCAGAAGCTGCCAAGCAGCGTGAACAAGCAAAAGCTGGTATATCATCACCATTCACTCAT…
51	Sa46F.270	GTTCAACTGGTGCATAAATCATTTGTGATCAGAAGAAGTGTTAGAAGTGAAAGTACTCGTTGCGCAGATAGCTATGATTCCTTCATGTTTCAGCAATCCAAATTCTATAGTATCCAGCAGCAACAGCAGTTCACAAAATCCACAACAAAATCTGACAACTTGTACTTACCAAGCTCAGTTCTTCAGCTCATTAACATCTCCAGGTTATGTTACACTTACTTGGTCAAAGTCTCAATCCTCACATTCATTGACCATTTATGTTCCTGACAAACTCACCATCGCCATTTCATTACTTCAACCCGCCTTGTCGTCTATTTTCAAGTCCAGGCCAGGATCTGGCTCCAAATCGATTTTTAACAATGGCCTCAAGTTTAAGGTAATTTGGGACTTTTGTGAGGC…
52	Sa46F.31	TGTGTGTACTGATGATGGAAAATGGTTAAACAGGTCCAGGATTTGATCTGCCTGCTCATTTCTCACCAATATACTTCCCCATGGGTAATGCTGCTACTGGATTCTTTGTAACTTTTTCTTTGATTGCTGGAGTTGTTCGCATTGCTTCGGTAACTGCTGGTTTTGGTTATGTTCGTCTACGGAGCCATGACAGCCTTCCCAGTGCCACTTCTGCTGCTACCATAGCTTGGAGTCTCACCCTCCTCGCCATGGGGTAATAATACTTCTAATCCACATTGTCACAAAAAAAAAATCTCTTCCAACCGAAATATTAAAGCATGTGTTTTCTTGAACAGGTTTGCCTGCAAAGAGATTCAGCTTGAGGTCAGGAATGCTCGCCTGGTAAGCAAAATTCATACC…
53	Sa47F.286	TCAATCTCTGTCCCATCTCACAATGTCCAGCCACTCCACTTATGAAATAATATGCTCTCTTGCTTCTAAGCTTGTACACTGTGTTGCCATTGTTTGAGTAGAAAAGTGGGTGTGTTGAATTACATGTCTTATAGTCTCCTTCCCTTACCTCCATCACTGCATCCTTCTTGTACTTAAAATCTGCATCAGCCATACAGACACAGTTCATCAAAAATGCTTAGATTGCATAAAGTTTGAATCTTTATTGAAAAAAGTTTATCTTTGGAAACAGTATCAAACGACGTTGTTTTGATTCTTTTTATATAAAACTACGCTGTACCACTAAACTATTTGTCTCAAAACACTGTGTTTTTATTCAAAACGATATTGTTTTGTACTGTACAACAAATGTATGTGCAT…
54	Sa55F.146	AATCTCACGAAATGAGATGCAGACTTGGAAGCTCCTACGACTACCAAAAACTAATAATCAATCTCAAAAAGTATCAGGGTTGATATGTAAATATCAATTGTTGGATGCCTATTTTTAGCTATTTTTTTGATGACCTGAAAATAATGAACATGCATGCTCGACTGTCGCCCACAAGCCACAACTTGAATCTTACTGCTTTCAGTTTTATGCTTTTACGTCACATTGCAAAAAGAGAGTTGTGTTAAATGCTACGTAATACTAGTAGTTATATAAACTCTTTCCGTTCATGCACTATAAAATGATTTATATTTACTCTAATAATATATGACATTTTGGTGATACTAAAATCATCATTTTCATACACAATAAATAAATTAAAAACAGAATTGAAGAATGAAA…
55	Sa56F.143	CTCAATATATACGGTTAGTTGTTTTTTTATAATACTATACAATTGTGTCATCATAAAAGTGTCAAAATATAAACATTGATAGTAGAGAGGCTGAGCAGATTGGAGCTGGCCAGGTTGGTCTTTGGTGGTTGAAAATGGTTAAGACTAGAAAGCTAATGTGAAAGAAACTCCATTGAAAGACGCTGCAACAGATTCTCGTTTTGAGAAGACCCAACCACAAATCTAAACATGACACTCAACGCACATGCTAACGTTTGTTTCTTTTTAAGGCTCTTTGTTCCCTCTACACTCTTTTGTCTGATCACCCACTTTGAATATCACTACAACGTGTTCATCAGACTTTCCGTCAACATTTTTTTGGTCCATTTTGCCCCTCCGAAAACCTATTCGAGCAACCAC…
56	Sa57F.156	ATAGACCCACAAAACACAGCTGTCTGCAAGAAGCCAAAAAAACCAACGTTAGAGAAGGTAAAAACAGTTTTCAAACTGACTTGCAAGAAGATACAAAAAAAAATTATAAGTTGATGCAATGACATTATAGTCAATTACCACTTCAAAAAATTCTGACTTTTCTAGAGTGGATCGAATTTTCATAGGGTAATTTTATATATAAAAAACAGTTTTAACCTGAAAATAGTAAAGATTATATGGTTAGGAAGATGAAGGCATTTAATTCTCATTGAACACTACATATGGTAAACTGTCATTTTCCAAACAAGAATAAAGGTGAAAATGACAAAAATTAAATTAAGATGAATAATCTCTTTTAGAGATATGATGATGAATATCAAATTCACAAACAAAGATGAA…
57	Sa5F.25	AACAATTTCTTATGTCTAACCGTTTGATTCAAGTCTTCAATTCAAGGACCTGCTAGGAGAAGAAAAAAAAGTGAACATAAGTCAACTCAGAGTGTGATAAATTTTATGCATAGACGTTCGCGACCGGTTATTAAATTTGCAGAAAAAAATTGGTGAGGATATTAATGTGAGTGGCAATCGGTGCATCTGAGAAATACCTCTCTTTTTTTTCATCAGGAAAAATGACTTGTTAAATGCGCGGTAATTAGCCAGACACTGGCGCTTTCGGAGGGACCAGTCAGTGTGTGCATTTTTTGCAACGAAGTGATGATGAGTAGTGTGCCGTGCTAATGTTGGAAGAGTTTGAAGTTGCAGAACAAGCATAAGCATGTTGCCGGGCGCAAGGGGCTGCTTCATATG…
58	Sa5F.658	ACAATTACTAAATACATTTAAAAAAACCAACTGTAGATTTCTAAACATAATAGTATGAGCTAGAACATCGTCTAACTAGGGCACAATCATATATTTTTTTTATATAGAAGTCACGAACCATTGATTAACTGAATCCTTCTTCCTTTCACTTGCCCCAGCTACTATGTGGCAGTAAAGACAGTTTCTGTATATAGAAAGCATTAAGGTAAAAAAGCAATTATTACATAAATGTGATTTAAAAAAAAAAAATTACACGAGTTGGAAATTTGTACCTGATGACAAAATTCAACAGCCGCTTATATTAGATGAAATATTGAATGGTAACAATAATGACCCAGCTAGCTAGATAGTGGTCAATACCCATTTTGGGGTGTACTTGAATGATAACTTTTTCTTGGT…
59	Sa64F.90	TTCCAAATCTTCAACTCTATAGAAACACACTTTGAGAATAATTAACATCACATGCCAAAAATCAGCTAAAGACCTCAAGCTAAAACTAAAGTCAGCATACACACACATTTATCCTTAAATACTACAAAGGAATGGAATGGATTTTGTAAAAATGAACAAATAAGTTATAAAGTATAAAAAAATTCTAACCGTTAATTTTAAAAATTCAATGGCTCAGATGTGGAGAGAGAGAAATTTTTAATATTTTATTTATTTATTATTAATTAATCCTGAGCGTCCACGTGTTTTTGATCAACGGTCAATAAAACTTTATATTTTATATCTTTTTATCTGATGCTCTCTCCTAATACAATCCTTAAATAATCTAACAAACATATGTTATCCAAATCCTCAAAATTA…
60	Sa66F.83	GCAGCGGAAATTAATGAAGGATAAAGTAAAGCCATACATACCGGATTTCAAGCTAGCGTTCGAGCATTTCTGCATCCACGCCGGCGGACGGGCGGTACTCGACGAAGTACAGAAGAATTTACAACTAAGCGATTGGCAAATGGAGTCGTCGAGAATGACGTTACATAGATTTGGGAATACGTCAAGTAGTTCGTTGTGGTATGAATTGAGTTATGCTGAAGCGATGGGTCGGGTCGGGAAAGGGAACAGGATTTGGCAAATTGCGTTCGGGTCGGGTTTTAAATGTAATAGTGCGGTTTGGAAAGCGTTGAGAAATGTGGAGAAAGGTGGTGGAGTTGGTAATCCATGGAATGATTCGATTGAGAGGTATCCGGTTAAGGTTGTACAAGGGAAGTGTTG…
61	Sa6F.163.1	CAGTAGCTACTTGGAAGTTTATTAATGAAGTGATGATCTAAATTGAACTGATTCTTTTGCTCTGCTGTTTTTTTGTTGTTTAGGAAAATCTCAAATCTGAAAGAGCATTTTTGTGGAGGGAAATGGAATAGCATCAACGAATAGGGCGGTGACACGTCTGCGGCGTGTGGATAACCTAATCCCATTCTTCATTCTTTCATGTCTTTGTGAGTCCCATTTTGCATTCTACACCACTGAACTTCATTACCTCTTTTCTTCTGTTTTAGCCTTCCATATCACTAGATTAAGGTAAAAGGGTAGTTAACACATTGTAGAAATCTAGGAGAATGTGGGGACAACATTTAATGGCCAACATACCATCCTGCACCCAGTTTCAACTTTCAACACTATAAGATTATT…
62	Sa6F.233	AAATCATGCTTAAACTCATGTTTACAGTTAAATTTACGTATAAAGAATTTTTATTTATAAGTACATATTGATTTTCCAAATTTAATAATACATCCATTTTATTATATAAATAAACGCATGTATAAAATAAATTTATATTTAAACCCACATTAGTTCATATATAATACACATATTTTTTTCATATATATTTTTCATATATTTGAAATTATAACTCATAATTAATGTGAGATATTGAGTTTTGTAGAAGTATTACTCTTTTCGTACCAAATTATATGTTCACGTGTGCTTTTCACGCATATTAAAAAAAATTATGTATATACAAAAGTACCTTTTAAGTGTATTAGAGTGTAGTCGTACGTTTTTCGAGAAAAGCTTTCTCTCTCCTTTCCAAAACTCTCT…
63	Sa72F.20	AGATCAGTTGCAATGTGAACACATATTTAACTGAATATTAAACATGTGAAGGTTGCTTGCAAGTAGAGATGAATTATTATCATATGGGCTTATCATACATCTATGAACAAAATGCTTGAGAAGAATTAGTTTTTCTTCATTTGTGGGAATGAGAGCCAGGACTGCCAAACTAAAAATGTGAATTGAAATAAGGTTTCACCTGATCTGGGTTTGAAGGTGGTTTTGTTTCCGATTTGTTAGGTTTATCCGTTTATGATGGTATGAGAACAGCGTAGCTTTGGTAATACATGTTCTAAAGGTAACGTTGACCTCAATATAGATGTTTATAATAGGTTCGCCTCCTGGGTTCCAAATTCTGTTCTGTGTTCACGAGGCTATGGGTTGTTTGAATTTGCAAAT…
64	Sa79F.141	ATGAACAAATGGACATACTGGCATCTGTATTTTTGAAACTGTAGATCACGTGTCTCTAATTGTATTTGTATTTTACAGGAGGAAATGGAAAGGAACAGCAAGGGTGCATCTGGTAACATATTCTTGTTATCTGTTTAATTGGAAATCTCTTCAGTTATGATTATTAGGGCTAAATTTTTATCGTTCTCTCAGGTTCAAAATCTGAAGGATCAGGGAAAGTAATGAAAGAGGTTGCCTGTCCAACTTGCACAGTGCATTTACAGGTACGGTCAACATCTTTATCAAATACTCTACTAAGTTCTGCTGATGCAGCCAACTAGCAACAAGTTAATCTGAAAGGTAGATGACGAATGATTTTGGTATATCAAAATTGCAGGTCGAGGTTCCAAGGTCAGGTTC…
65	Sa79F.142	CGTCATTTATTTTTAAAAATATTATCTGTAAATCATCTATATATGTGTATAATTAATGTTTGTTTTTTTGAATATTTTTTTTTGAAGGATTTGAAGTGGTGGATAGAGGGTGTTGTGGAACTGGAACAATAGAGGTGACAATATTGTGCAGCGAGTATGTTCATGTAAAGACATGTTCTGATCCGACAAAATATGTTTTTTGGGATTCTTTCCATCCTACAGAAACTGCATACAAGATTGTTGTTTCAAAGATTCTGGAACCAGCTATTCCTAAACTTTACTTATAATATAAAGCTAGCTAGAACCATAAATATATATATTGATCACAATCTTGTTACACCTGCTACTGGGATGCCAAATATAATAAAAATATGTTTGTATGATTTTATTTGTTAACTA…
66	Sa79F.143	CTTTTTTGTGACTTTCAGAGCCTAATTTTAGGGCAGCTATATTGCAAAGCCCTTGAATGCATGCGTACGTAGCCAACTTTCTGGATATACATCATCGTCGTTAGGTCCGGACTAATTAATAATTTTTTAATAGCTCTGATTGATTAAATAATTTTATTAGGGTTTTTATAAGTAACGGCACGCTGGTGCGTGATATTGCTGGCATGTTTGAAAATATGTATACGTCGTTAATAATCAAACTTTTTGCTTCACAAATCGACTCGTCCATACATACATATATCAATAAATTAACCCCCTCTTCATTAATTCAAGGATTAGGATCCCTCCATACATACATATGTCGTTTTAATGTAAAGTGTTGTAGTTTTGCAAAGGATTTCGTGGTCAAACTTTGGTTAG…
67	Sa7F.179	TGCGTTCAATGATGATTACTGTCTAGGGTTTCCTGCTGCTTTTGGTCCATAATTTCTGATTTTTTATCTGTTTTTGTTGGAGGGTTAATTCGGCTCATTATATGTCCGTTTTTTATATGAGCTTGTTAGGTATATGTATGCGAGAAATTCTTACTTATGTCTAAGGTTTCTGATGTTTTATGAATATCATAATGCATTACACGGTCTTTTGACTGAGATTGCACATGATGCTGTTTTAGACTTAGAGACTTTCATTTATTAAACCCACATTTCAATGTTGAATTTGTCTGATGTAAAATGTATCTGATTCTTATTTTTCTAATGTTTTATTAAGCGTAAATGTGATTTTGTATTATTGTAGCAAAACTGGCGTAGACCTAAGGGTATTGACTCTAGGGT…
68	Sa7F.184	AAGTAAAGAAAGTGAATTGATCAAGATGCGTGCAAACTCCCCGCTTACGTGAGCATGACGACGTCGTATTAAGCTTACTAAGTTGCGTGGGTCAACGTCATGCATTGCGAGTGCATTGATATAAAAATCCAACAAGTCAATTAATTTGATTTATTAGTGTGGAGTGGATTGGACTTGATAGCTATTTGCCGAAATTGACTTGTTAAACGACGCCGTATTTCAAAGTTAACAGGTTCACCGAACTTCAAGTCGCCGAACGTTCTGATTGCTGAATACGGATGGCTGACGTAGCTTCCAAAGCTCATGATTAATATGGGCCTGCGGTTATATGGTTTGGGCCGTTCACCAGGGCCACTCAAAACATGGTCTAACAACCTGCTGCTAAGATGTTTAAATTTC…
69	Sa7F.458	AGAAGTTTTAGCTGGACATAGGGTCTGGAAATCCATTAAAACAGGCTCTCAAATATTGCAAGAAATAATATGATGAGGTTTGAACCCAATCCATATAACCTTGCCTAACTTTGTTGCTTCATGGATACGATGTGGTATTACTTATGAGAATATATAGACAGAATCACAGAATGAAAAGAGAACATGGCTTGACCGAATCTCTTTGACTCAAATTTTAAAGTCTCTGCTATAAGTTGTTGTGGGAGTAGTAGCTATTATGAATTCAGGCCTGAACATCATTTCTTTGTATGAGATCATTAAGGCTAAATCTCTCAAATATTGCAGAAGCTAAAATGTTTGATGTTGCCAATTGGCATTGATGATGCTTAAGTTGATTTTTGTTTCTTTCTTTCCAGCATT…
70	Sa7F.504	CCTACAAACATTTCAAGACCATGAAGCCAAAGCCAATGAACTCAACTCCAAACGCGAAGCTATATGGAAACGCTTGGAAGACATCGCGGAAGCCAATACCATCAAAAACAACAACTAGAGACCAACCACCAACCAACAACATTTCTTAAAACCTGTTACAATGTGAGTCCCAAAGTCTCGTCCAGCAGCAGCCAAAACTTGCTCTGTAATTGCTAGGACATGGATTAGGTTGATCTCAGGGTCTACCGGAGTTGTTCATTTCAAGAATATGACGACGACGAGGTTGTTTGGTATTTGTGTAAGCAGTGTAAATATAAGGAGTCATTGGCGAAGAGGAGAATGAGACATAGCTTGGTTTGTTGTCATAGAAGCTGTTTGAACTTAGAACCTCAATTTGGT…
71	Sa81F.175	ACGACAGAACAGGTATTTTACCAATCCTTGGTTGTTTTCCAGACGTTTTGCTTACTCAAATTTATAAAATAACTGTCGATTTTCTGGTGCTTCCGTAAGGTTTTATGTGATTTAGTAGTTTCTGCCACACTTATTTCCTATAAGACCGATCAAACACGAGTCTCTAATATTGTTTTGATTTTCTGTGAATATTTCTACAACTGTGGCTAATAGTTGAATTTTACTCAGGTTAACGCATCGGGGAACATGTGTGCTATTTGCCAAGAGAAAATTCATACCCCGATTTTACTCCGCTGTAAACATATATTCTGCGAGGACTGCGTCTCAGAATGGTAAATCCTCATAACTTTTATCCTTGTATCATTAGCAACTAAAATTAATCGCAAAGCGTATGGCACA…
72	Sa82F.57	ACATGCTTTCTGGTTTCTGTTATAAAGTACTCATTCCTCCTAACTAAACGCCATTGCGGTTGCAGCAGGTCTCTTAATCTCTAACACCGTTGAAAGTTTCTTTGGTTAGAAATGGCTGGAGAGCAAATGAAATCTGCAGCCACACTCCTACTCCTGCTCAACTTCTGCATGTATGCTATCATTTTAGGCATTGGTGCATGGTCTATCAACAAAGCAATCGATCATGGCTTCGTCATTGGTATCATTTCATCACTCATTCAAACCGATTTTGGACTTTTAGCTAGTGTGTTTCACAGTTGATTTTTTTTTCTGACAGGTCCGGGATTTGATCTCCCTGCACATTTCTCACCAATATACTTCCCGATGGGAAATGCTGCCACCGGATTCTTTGTCACATTT…
73	Sa84F.200	ACGGTATAGTTAAATGCACGTAAAACCGGACGTTGATGTATTTTATTATTAAATTATATCTGAAGTCCAAAACGATGTAGTTTTAATCTGAACCCTAAACCCTAAACCCTAAACCCTAAATCACTTTGATTAGTTAAATTTTTATAATTGGACGAAAATGCCCTTGAATTTAATAGTTCAGGTGTCAATTTGAAACAAAAGGTGTCTATTTGAAAAGATAAAAAGTTTAGGTGCTAATTTGAAAAGATGTTAGTACTTCAGGTGGTTATTTGAAATTAAGCCTTATTTAAATGGTTGCAAAACACTTTTGGATTCAATCCCAGCGACTCCAATCCCCTAGCACGCCAGCACATACAGAATCCCAGCCGTCCATCTCGATCTAAATCTCACATGTCACAC…
74	Sa86F.120	CTGGTGCATAAATCATTTGTGATCAGAAGAAGTGTTAGAAGTGAAAGTACTCGTTGCGCAGATAGCTATGATTCCTTCATGTTTCAGCAATCCAAATTCTATAGTATCCAGCAGCAACAGCAGTTCACAAAATCCACAACAAAATCTGACAACTTGTACTTACCAAGCTCAGTTCTTCAGCTCATTAACATCTCCAGGTTATGTTACACTTACTTGGTCAAAGTCTCAATCCTCACATTCATTGACCATTTATGTTCCTGACAAACTCACCATCGCCATTTCATTACTTCAACCCGCCTTGTCGTCTATTTTCAAGTCCAGGCCAGGATCTGGCTCCAAATCGATTTTTAACAATGGCCTCAAGTTTAAGGTAATTTGGGACTTTTGTGAGGCTAAGTT…
75	Sa92F.24	TTTAAAACTTTATTCACGTTTAAATATGATTTAATAAGTATATCACATATAATGGGGTGATGGCCCATTGTTTGAGGAGCCGATCAAGTTTCCTCATGGTCAGGGGTTCGAATCTTGACCTTCACCATTTAATTGTTATTTTCTTGTTTTAGGTGTTTGCTTTACTTTCCTCCCGTTTCCAGGCGAGGAGGCCCTTTCTTCCTCCCGCGAGGAGGCCCTTCCTTCCATCATGGTTGTTTGTATCGAGATGACTCGAGCTAAAATGATGCGCTGCTTGAATGTCGTGTCAAGAGTATTGGTAGAGTTGTCAGAGATTGTCTGAGCTTTAAAATGAAGATAGTGTACTAGATATAATCTACATATGCTTTAAACATACTCTTGTACTACATGTATCCACCC…
76	Sa95F.131	GTAAGATTGATATTTCCTTTGTCACATTTTAAGCGCGTTTTGTCCTTAGAAATGACCATTTCTCTTTTGTAAAAAGTCGTTTACAACTTTTTTATGATCGGATGATATTATTAATAAAAGCTGATGACACCCATCAAATTTTTTTAAAAAAAGACTTTATCAAGATTGAGATTTCATACAGTCAAAAACCAATTACTTTCATTTAAAACTACGCAGTTTTGATACTAAAGGTATAATTTTGCAAAGGATTTAATAAGAAACCCTAATCACATTATCCTTATTACTTAAAAATAAATTTCCAAAATGCAAATTTTGTCACAAAAACTGAAATGTTAGAGAGAGAAATGTGCATTTATTCAACTTCATTTAGGGTTACAAACCGACAGAAATACAGCACAG…
77	Sa99F.11	TTTTAAAATCACCAACCATTCACCAAACTTTGTCCTGGCGCATTAGAAATCTCTAATGCGATAGTGGTACTAATTTTTAACATTACTTGACTTATCAAAACAGAAAACATGTAGTATATATGTAGCAATTTACTTACTTTGTTAAGTAATCACTAAAGAGTAGATTTTTATAATTTTTTCAAAATCTAATTTTCTACCATCAAGTTATTCACCTGACATATATGTCTCTATGAAATATCAATATATAATTGTTTGTCAATCGATCTTAAAAAAATAAACAGTATAGCAGAGCAGCAATGTGGTCATTGTCTTAAGATAATTATCAAAGTTTTTGTGACTCACTGACTGTTGAAGGTAGCATAATACCATGAAAGAAAGAAAAAGTTGTGTACCATGGAA…
78	Sa9F.272	AATTGATGAGCTTGAAGATGCTTCGGCGGATTCACATGCAGAAAAAAAATTGAATAAAAGAGGAGTCTTGATTTGGTATAGGCTGTTGTTGGGAAGGAGACGACTAACAATGAAGCCGAAGACGTTACGATTAAGGTGAACGCGTTGCACTGGATCATTACTTCGTGGAACGATGAAGTGAAACACGGACTAGCTAATTTTTTTTTTTTTTTCGATTGCGTGGTTTACAAGTAGTACAAGACTCTTACATAAGTACATTATCAAACTATTAAAGCACAGGCCAAATAGCACCTCCACCAAAACTCCATTCATCGACAAGCTTCGAAGCAACACGCCAACTTCACACGGAAGACATACGAACCCTGGACCTAAAGGTCCCATGACGGAACCTTTTACCAA…
79	Sa9F.31	CTTTGAAGCTCAACTTGTTGTATTGATGTGTGGAGTGAATTTGAATAAGATACTTACGATTGTCAGTTTTCAGGAATCTGATTCCTGCCCTCTTTCAGGAGCTGTTTCCCTCTGCAATCCATTTAACTTGGTGATAGCAGATGAAGACTTCCGCAAGGGATTTAACAACATATACGACAAATCTCTTGCAAATGCTCTTGTCAAGATATTTAAGAAGTAATTCCATTAATATTCTCACTCATCCTTGTTATGTAGATGATTTTTTACATATATTTCCCTAGTTCCATTTTTGTAATTGAACTCAAATCCCATTTTCTTACGCCTATTATGTTTTGCAGTCACGCTCTCCTATTCACTGATATGCCAGGGGAGTACAATATTCAACTTGCAGCTAATGCA…
80	Sa9F.81	AAATGATACCAGGATGTAATCTAGAGGCTCGAGCGAAGTAAGGATCTGTGCTATAACAAAAGAATTCGTCAGGCACAAGTAAAGCTCAGTTTCAAGAACATGAAAAACTAATGTCTGGAAAATGACAGAATCCGAAATGTTCCAACAGTAGCCGATATGTACGAAGAAAAGGTAGTCGACTATGATGAACTGAGAACGTATATGAAAAGAACTGCGAGGAAAAGAAAAGAAAAATTCATTTTACCCGCTGATTGGCAGCTTGACTCGACTCTTCATAATCCGGCCATAATTTCAGTAGTACAAATCGGCAAGATGATACTATGACTACTAACCCAGCAGTAACTTCAAGATGCCAAATCTCAAAACTAACTGCAGGTGACAAGGTATATATCAGTTTTG…
